# Supplementary material for: Integrated transcriptomics and untargeted metabolomics reveal bone development and metabolism of newly weaned mice in response to dietary calcium and boron levels
Source: Royal Society of Chemistry journal article supplement (doi:10.1039/d4fo03657c), 2024-01-01
Supplement: d4fo03657c1.zip [file d4fo03657c1.zip]

## Sheet: +Ca+B VS -Ca+B
ID	meanControl	meanTreat	foldChange	log2FoldChange	pvalue	FDR	+Ca+B 1	+Ca+B 2	+Ca+B 3	+Ca+B 4	+Ca+B 5	+Ca+B 6	-Ca+B 1	-Ca+B 2	-Ca+B 3	-Ca+B 4	-Ca+B 5	-Ca+B 6	vip	Name	mz	rt	exact_mass	ppm	formula	precursor_type	class	sub_class	KEGG	KEGG_Pathway	CAS	hmdb	Regulation
M102T42_2.pos	1.84629e+07	1.74984e+07	0.94776	-0.0774066	0.813037	0.972289	1.70857e+07	2.56092e+07	8.15954e+06	2.91814e+07	5.82862e+06	2.4913e+07	2.59053e+07	3.16987e+07	1.0979e+07	5.53415e+06	7.01972e+06	2.38536e+07	0.196947	2-Ketobutyric acid	102.034	42	102.032	2.58889	C4H6O3	[M]+	Keto acids and derivatives	Short-chain keto acids and derivatives	C00109	Carbohydrate metabolism; Amino acid metabolism	600-18-0	HMDB0000005	Nodiff
M102T46.neg	7.33373e+06	5.31516e+06	0.724755	-0.464434	0.935114	0.985477	7.34832e+06	1.5516e+06	2.17753e+07	9.81583e+06	1.96344e+06	1.5479e+06	1.35536e+06	1.66951e+06	9.76643e+06	6.65495e+06	7.1464e+06	5.2983e+06	0.0684013	Dimethylglycine	102.056	45.8	103.063	2.70439	C4H9NO2	[M-H]-	Carboxylic acids and derivatives	Amino acids, peptides, and analogues	C01026	Amino acid metabolism	1118-68-9	HMDB0000092	Nodiff
M102T51.pos	1.04688e+08	9.73817e+07	0.930206	-0.104378	0.765527	0.962667	1.6435e+08	8.32712e+07	1.1768e+08	1.42835e+08	6.74947e+07	5.24986e+07	1.56206e+08	4.38394e+07	6.84533e+07	7.2432e+07	1.11625e+08	1.31735e+08	0.247603	1-Aminocyclopropanecarboxylic acid	102.055	50.6	101.048	0.979863	C4H7NO2	[M+H]+	Carboxylic acids and derivatives	Amino acids, peptides, and analogues	C01234	Amino acid metabolism	22059-21-8	HMDB0036458	Nodiff
M102T689.pos	5.75489e+07	1.12961e+08	1.96287	0.972965	0.640306	0.929963	3.62782e+07	7.30509e+07	7.4619e+07	5.3989e+07	5.45264e+07	5.28299e+07	1.38512e+07	6.67576e+07	1.58236e+08	4.84797e+07	4.99825e+07	3.40459e+08	0.502639	Triethylamine	102.128	688.7	101.12	0.00529945	C6H15N	[M+H]+	Amines	Tertiary amines	C14691		121-44-8	HMDB0032539	Nodiff
M103T49.neg	1.26768e+07	1.17087e+07	0.923631	-0.114611	0.993128	0.999068	2.48745e+07	1.00517e+07	1.07412e+07	9.00062e+06	1.45643e+07	6.82852e+06	1.33701e+07	1.15972e+07	1.19713e+07	1.2412e+07	8.5066e+06	1.23951e+07	0.0327265	(R)-3-Hydroxybutyric acid	103.04	49.3	104.047	2.67856	C4H8O3	[M-H]-	Hydroxy acids and derivatives	Beta hydroxy acids and derivatives	C01089	Carbohydrate metabolism; Signal transduction	625-72-9 / 300-85-6	HMDB0000011	Nodiff
M104T50.neg	5.95212e+07	4.17857e+07	0.702031	-0.510393	0.634275	0.892859	1.89446e+08	3.09252e+07	4.38214e+07	4.12263e+07	2.81324e+07	2.35755e+07	9.06431e+07	1.71209e+07	2.29259e+07	3.54869e+07	3.78987e+07	4.66389e+07	0.398861	L-Serine	104.036	49.5	105.043	2.65294	C3H7NO3	[M-H]-	Carboxylic acids and derivatives	Amino acids, peptides, and analogues	C00065	Cancer: overview; Membrane transport; Signal transduction; Digestive system; Lipid metabolism; Carbohydrate metabolism; Translation; Amino acid metabolism; Energy metabolism	56-45-1	HMDB0000187	Nodiff
M104T575.pos	2.70075e+07	2.14396e+07	0.793838	-0.333083	0.798627	0.970085	9.19028e+07	3.03065e+06	1.20448e+07	2.1231e+07	1.76299e+07	1.62056e+07	9.27962e+06	3.64295e+07	2.42331e+07	3.2715e+07	1.24793e+07	1.35008e+07	0.259746	Choline	104.107	574.5	104.108	0.960551	C5H14NO	[M+H]+	Organonitrogen compounds	Quaternary ammonium salts	C00114	Cancer: overview; Membrane transport; Nervous system; Digestive system; Lipid metabolism; Amino acid metabolism	62-49-7	HMDB0000097	Nodiff
M104T622.pos	2.29944e+07	2.74503e+07	1.19378	0.255537	0.376504	0.808108	1.71824e+07	4.19255e+07	7.20314e+06	1.80067e+07	2.67279e+07	2.69209e+07	2.74009e+07	2.51876e+07	1.34476e+07	3.22146e+07	3.4504e+07	3.1947e+07	0.799015	gamma-Aminobutyric acid	104.107	621.9	103.063	3.6859	C4H9NO2	[M+H]+	Carboxylic acids and derivatives	Amino acids, peptides, and analogues	C00334	Metabolism of cofactors and vitamins; Metabolism of other amino acids; Signal transduction; Nervous system; Sensory system; Endocrine system; Carbohydrate metabolism; Signaling molecules and interaction; Amino acid metabolism; Substance dependence	1956-12-02	HMDB0000112	Nodiff
M105T47.neg	2.8113e+07	1.81938e+07	0.647166	-0.627793	0.605599	0.882709	9.55853e+07	1.25031e+07	1.89473e+07	1.95094e+07	1.23655e+07	9.76728e+06	4.05437e+07	6.98463e+06	9.50888e+06	1.64405e+07	1.57474e+07	1.99374e+07	0.425753	Glyceric acid	105.02	46.5	106.027	2.62808	C3H6O4	[M-H]-	Organooxygen compounds	Carbohydrates and carbohydrate conjugates	C00258	Carbohydrate metabolism; Amino acid metabolism; Lipid metabolism	473-81-4	HMDB0000139	Nodiff
M107T99.pos	8.1527e+06	8.11679e+06	0.995596	-0.00636795	0.53284	0.889452	1.81934e+07	6.09613e+06	7.79887e+06	6.95952e+06	8.74472e+06	1.1236e+06	9.05697e+06	7.74535e+06	7.96992e+06	6.69911e+06	9.86007e+06	7.36933e+06	0.537684	Benzaldehyde	107.049	99	106.042	0.00100233	C7H6O	[M+H]+	Benzene and substituted derivatives	Benzoyl derivatives	C00261		100-52-7	HMDB0006115	Nodiff
M109T33.pos	3.98838e+06	4.577e+06	1.14758	0.1986	0.413734	0.828815	6.29483e+06	2.82902e+06	2.94079e+06	3.27277e+06	4.57262e+06	4.02026e+06	6.39866e+06	4.11041e+06	4.21904e+06	2.91495e+06	5.81552e+06	4.00344e+06	0.691002	m-Cresol	109.022	33.1	108.058	2.51839	C7H8O	[M+H]+	Phenols	Cresols	C01467		108-39-4	HMDB0002048	Nodiff
M110T331.pos	8.35961e+07	7.84111e+07	0.937975	-0.092379	0.536761	0.891203	1.00991e+08	8.96471e+07	8.31426e+07	6.83014e+07	6.92245e+07	9.02705e+07	7.28051e+07	7.37045e+07	8.76621e+07	2.44571e+07	1.14571e+08	9.7267e+07	0.554485	Catechol	110.019	330.8	110.037	12.4815	C6H6O2	[M]+			C00090		120-80-9 / 12385-08-9		Nodiff
M110T642.pos	5.35075e+08	5.16499e+08	0.965283	-0.0509757	0.948146	0.991814	1.0202e+09	3.33785e+08	4.81421e+08	5.81595e+08	2.54203e+08	5.39247e+08	1.87636e+08	5.44389e+08	4.31205e+08	7.28125e+08	5.9001e+08	6.17631e+08	0.0150271	Hydroquinone	110.021	641.8	110.037	1.89295	C6H6O2	[M]+	Phenols	Benzenediols	C00530	Amino acid metabolism	123-31-9	HMDB0002434	Nodiff
M111T41.neg	6.46401e+06	5.79989e+06	0.897258	-0.156405	0.234263	0.744093	5.41427e+06	5.62854e+06	8.22064e+06	7.30923e+06	5.65161e+06	6.55979e+06	6.17047e+06	5.90573e+06	5.79823e+06	5.41548e+06	5.09481e+06	6.41461e+06	1.10043	2-Furoate	111.009	40.6	112.016	2.48628	C5H4O3	[M-H]-	Furans	Furoic acid and derivatives	C01546		88-14-2	HMDB0000617	Nodiff
M111T61.neg	3.17438e+08	1.55599e+08	0.490171	-1.02864	0.390987	0.816638	1.12089e+09	1.40675e+08	1.77471e+08	2.09836e+08	1.65892e+08	8.9873e+07	2.14584e+08	7.85758e+07	1.28506e+08	1.60956e+08	1.55364e+08	1.95609e+08	0.725267	Uracil	111.02	61.4	112.027	1.80148	C4H4N2O2	[M-H]-	Diazines	Pyrimidines and pyrimidine derivatives	C00106	Metabolism of cofactors and vitamins; Metabolism of other amino acids; Nucleotide metabolism	66-22-8	HMDB0000300	Nodiff
M112T509.pos	4.06168e+07	7.17126e+07	1.76559	0.820149	0.075919	0.500549	4.20604e+07	2.11185e+07	3.0106e+07	5.17583e+07	3.80345e+07	6.06235e+07	3.4669e+07	5.24688e+07	4.96008e+07	1.13491e+08	1.24953e+08	5.50927e+07	1.53312	Pyrrole-2-carboxylic acid	111.521	508.8	111.032	14.6606	C5H5NO2	[M+H]+	Pyrroles	Pyrrole carboxylic acids and derivatives	C05942	Amino acid metabolism	634-97-9	HMDB0004230	Nodiff
M112T51.pos	5.07175e+08	5.61905e+08	1.10791	0.147843	0.567103	0.901788	3.39282e+08	8.77602e+08	4.38451e+08	4.11171e+08	4.40538e+08	5.36006e+08	3.25687e+08	5.8209e+08	4.27543e+08	6.88582e+08	5.62755e+08	7.84776e+08	0.532594	Cytosine	112.051	51.2	111.043	0.214189	C4H5N3O	[M+H]+	Diazines	Pyrimidines and pyrimidine derivatives	C00380	Nucleotide metabolism	71-30-7	HMDB0000630	Nodiff
M113T54.pos	2.17912e+06	4.53029e+06	2.07896	1.05586	0.0512832	0.439917	1.98472e+06	2.77687e+06	2.72148e+06	1.84908e+06	2.36189e+06	1.38065e+06	1.11341e+07	2.71307e+06	3.33773e+06	4.73526e+06	2.48793e+06	2.77369e+06	1.55453	Heptanoic acid	113	54.3	130.099	3.92321	C7H14O2	[M+H-H2O]+	Fatty Acyls	Fatty acids and conjugates	C17714		111-14-8	HMDB0000666	Nodiff
M114T185.pos	3.53448e+07	3.62101e+07	1.02448	0.0348933	0.74587	0.957864	4.45277e+07	2.78637e+07	3.15916e+07	4.78354e+07	3.58548e+07	2.43957e+07	6.19744e+07	6.63153e+07	2.35825e+07	2.10417e+07	2.49804e+07	1.93662e+07	0.361556	2-Heptanone	113.962	184.6	114.105	16.511	C7H14O	[M]+	Organooxygen compounds	Carbonyl compounds	C08380		110-43-0	HMDB0003671	Nodiff
M114T50.pos	6.12641e+07	6.20022e+07	1.01205	0.017276	0.904144	0.987922	4.62376e+07	5.38125e+07	4.11543e+07	1.2122e+08	5.18527e+07	5.33072e+07	5.15844e+07	2.81693e+07	6.7923e+07	6.93407e+07	8.66551e+07	6.83405e+07	0.234072	Creatinine	114.066	50.2	113.059	0	C4H7N3O	[M+H]+	Carboxylic acids and derivatives	Amino acids, peptides, and analogues	C00791	Amino acid metabolism	60-27-5	HMDB0000562	Nodiff
M114T606.pos	3.28131e+07	3.08994e+07	0.941679	-0.0866928	0.823458	0.974479	2.56239e+07	2.59366e+07	2.99481e+07	5.18157e+07	2.67203e+07	3.68338e+07	2.89928e+07	3.13763e+07	3.2487e+07	2.8579e+07	3.27374e+07	3.12237e+07	0.0996083	Epsilon-caprolactam	114.091	605.6	113.084	0.00641237	C6H11NO	[M+H]+	Lactams	Caprolactams	C06593		105-60-2	HMDB0062769	Nodiff
M115T100.pos	6.34976e+06	9.60412e+06	1.51252	0.59695	0.160885	0.634936	1.47213e+06	7.08213e+06	1.11942e+07	5.74582e+06	7.18913e+06	5.41517e+06	7.32443e+06	1.39263e+07	7.75168e+06	1.55292e+07	6.76248e+06	6.33062e+06	1.16374	Dihydrouracil	115.039	100.1	114.043	1.47177	C4H6N2O2	[M+H]+	Diazines	Pyrimidines and pyrimidine derivatives	C00429	Metabolism of cofactors and vitamins; Metabolism of other amino acids; Nucleotide metabolism	504-07-4	HMDB0000076	Nodiff
M115T44.neg	7.50385e+06	1.34426e+07	1.79142	0.841104	0.10994	0.688021	2.36609e+07	2.0231e+06	5.41612e+06	6.42185e+06	1.96207e+06	5.53905e+06	1.30739e+07	2.36444e+07	5.19821e+06	5.84397e+06	2.15393e+07	1.13555e+07	1.41503	Fumaric acid	115.004	44	116.011	1.53038	C4H4O4	[M-H]-	Carboxylic acids and derivatives	Dicarboxylic acids and derivatives	C00122	Cancer: overview; Metabolism of cofactors and vitamins; Endocrine system; Carbohydrate metabolism; Cancer: specific types; Amino acid metabolism; Energy metabolism	110-17-8	HMDB0000134	Nodiff
M115T686.neg	7.00332e+08	2.89664e+08	0.41361	-1.27366	0.278916	0.764209	2.59173e+09	2.23902e+08	9.08787e+08	1.58201e+08	1.56553e+08	1.62816e+08	4.24872e+08	7.1728e+07	2.70369e+08	8.23942e+08	2.93971e+06	1.44135e+08	1.0155	Caproic acid	114.933	686.3	116.084	3.09367	C6H12O2	[M-H]-	Fatty Acyls	Fatty acids and conjugates	C01585		142-62-1 / 151-33-7	HMDB0000535	Nodiff
M116T122.pos	1.94119e+07	1.35044e+07	0.695674	-0.523516	0.797505	0.970085	6.08045e+07	7.21177e+06	2.66598e+07	1.59751e+07	3.40985e+06	2.41069e+06	1.60343e+06	3.60121e+06	1.31557e+07	3.18661e+07	1.07886e+07	2.00113e+07	0.173505	L-Proline	116.072	121.8	115.063	2.97624	C5H9NO2	[M+H]+	Carboxylic acids and derivatives	Amino acids, peptides, and analogues	C00148	Cancer: overview; Membrane transport; Digestive system; Translation; Amino acid metabolism	147-85-3	HMDB0000162	Nodiff
M117T43_2.neg	3.17122e+06	7.07757e+06	2.23181	1.15822	0.0276204	0.631958	2.69368e+06	6.73226e+06	2.47719e+06	2.45737e+06	2.40473e+06	2.26208e+06	3.23254e+06	6.85591e+06	1.21189e+07	9.43001e+06	2.92655e+06	7.90158e+06	1.77084	Succinic acid	117.02	42.7	118.027	2.35858	C4H6O4	[M-H]-	Carboxylic acids and derivatives	Dicarboxylic acids and derivatives	C00042	Cancer: overview; Metabolism of cofactors and vitamins; Nervous system; Signal transduction; Endocrine system; Carbohydrate metabolism; Amino acid metabolism; Energy metabolism	110-15-6	HMDB0000254	Up
M117T459.neg	3.23874e+07	2.98566e+07	0.921858	-0.117383	0.510095	0.851259	2.82941e+07	3.15899e+07	4.45322e+07	2.59682e+07	2.80219e+07	3.59181e+07	2.05733e+07	4.18298e+07	2.68461e+07	3.65279e+07	3.26605e+07	2.0702e+07	0.618916	Guanidoacetic acid	116.927	459.2	117.054	0.0913984	C3H7N3O2	[M]-	Carboxylic acids and derivatives	Amino acids, peptides, and analogues	C00581	Amino acid metabolism	352-97-6	HMDB0000128	Nodiff
M117T527.neg	5.77318e+07	4.0862e+07	0.70779	-0.498607	0.350598	0.801767	3.29577e+07	5.50691e+07	5.97164e+07	4.67598e+07	1.33364e+08	1.85237e+07	1.64181e+07	9.82127e+06	5.06059e+07	2.30617e+07	8.43621e+07	6.09027e+07	0.751817	Methylmalonic acid	116.928	527.2	118.027	2.85327	C4H6O4	[M-H]-	Carboxylic acids and derivatives	Dicarboxylic acids and derivatives	C02170	Carbohydrate metabolism; Amino acid metabolism; Nucleotide metabolism	516-05-2	HMDB0000202	Nodiff
M117T686.neg	7.69748e+09	4.94134e+09	0.641942	-0.639486	0.409136	0.821247	2.18063e+10	5.56404e+09	6.19527e+09	5.15212e+09	3.71615e+09	3.75107e+09	7.94902e+09	3.73411e+09	4.29032e+09	3.83323e+09	4.1659e+09	5.67543e+09	0.777416	Betaine	116.927	686.1	117.079	0.319204	C5H11NO2	[M]-	Carboxylic acids and derivatives	Amino acids, peptides, and analogues	C00719	Amino acid metabolism; Membrane transport	107-43-7 / 590-46-5	HMDB0000043	Nodiff
M118T190.pos	2.15074e+07	2.08353e+07	0.968751	-0.0458025	0.453048	0.849707	2.39886e+07	1.88157e+07	2.23139e+07	2.12967e+07	2.1943e+07	2.06866e+07	2.15701e+07	2.14817e+07	1.92924e+07	2.08066e+07	2.03758e+07	2.14852e+07	0.695007	Indole	118.065	190.3	117.058	1.89726	C8H7N	[M+H]+	Indoles and derivatives	Indoles	C00463	Amino acid metabolism; Digestive system	120-72-9	HMDB0000738	Nodiff
M118T219.pos	1.91523e+07	2.58659e+07	1.35054	0.433533	0.338526	0.782568	9.45622e+06	1.73257e+07	2.86731e+07	2.50338e+07	6.67636e+06	2.77487e+07	2.02602e+07	2.84547e+07	1.24665e+07	1.70655e+07	2.32542e+07	5.36943e+07	0.857256	5-Aminopentanoic acid	118.085	219	117.079	7.6928	C5H11NO2	[M+H]+	Carboxylic acids and derivatives	Amino acids, peptides, and analogues	C00431	Amino acid metabolism	660-88-8	HMDB0003355	Nodiff
M118T58.pos	4.53214e+09	4.66107e+09	1.02845	0.0404705	0.731523	0.955145	8.55694e+08	8.79525e+09	2.37176e+09	5.33937e+09	2.54711e+09	7.28363e+09	7.66521e+09	2.45942e+09	7.70022e+09	2.06696e+09	2.76796e+09	5.30666e+09	0.335154	L-Valine	118.086	57.7	117.079	0.846838	C5H11NO2	[M+H]+	Carboxylic acids and derivatives	Amino acids, peptides, and analogues	C00183	Cancer: overview; Metabolism of cofactors and vitamins; Membrane transport; Digestive system; Translation; Amino acid metabolism	72-18-4	HMDB0000883	Nodiff
M118T686.neg	8.99555e+08	8.58268e+08	0.954103	-0.0677832	0.617012	0.886459	6.46447e+08	9.77428e+08	9.04328e+08	9.03272e+08	9.34655e+08	1.0312e+09	8.4768e+08	9.18878e+08	7.36018e+08	9.00908e+08	8.95529e+08	8.50598e+08	0.512657	L-Homoserine	117.928	686.4	119.058	7.51624	C4H9NO3	[M-H]-	Carboxylic acids and derivatives	Amino acids, peptides, and analogues	C00263	Energy metabolism; Amino acid metabolism	672-15-1 / 1927-25-9	HMDB0000719	Nodiff
M119T190.pos	1.34481e+07	1.00608e+07	0.748124	-0.41865	0.0915923	0.52892	1.13033e+07	9.257e+06	1.18716e+07	1.66069e+07	1.75337e+07	1.41159e+07	9.63253e+06	1.50641e+07	1.07213e+07	1.0629e+07	8.52789e+06	5.79012e+06	1.41241	5-Hydroxypentanoic acid	119.073	190.4	118.063	24.5563	C5H10O3	[M+H]+	Fatty Acyls	Fatty acids and conjugates	C02804		13392-69-3	HMDB0061927	Nodiff
M119T467.pos	7.59223e+06	8.5308e+06	1.12362	0.168157	0.531488	0.888802	3.35352e+06	1.06619e+07	3.66379e+06	8.25527e+06	1.58214e+07	3.79751e+06	4.16937e+06	1.19049e+07	1.07987e+07	1.1246e+07	8.47572e+06	4.59005e+06	0.571255	L-2,4-diaminobutyric acid	119.085	466.5	118.074	26.2335	C4H10N2O2	[M+H]+	Carboxylic acids and derivatives	Amino acids, peptides, and analogues	C03283	Amino acid metabolism	1758-80-1	HMDB0006284	Nodiff
M119T52.neg	6.69711e+07	3.23176e+07	0.482561	-1.05122	0.188586	0.724699	1.06649e+07	4.62977e+07	1.14284e+08	8.25187e+07	5.13786e+07	9.66831e+07	1.03082e+07	4.05735e+07	4.11282e+07	2.77312e+07	3.51089e+07	3.90558e+07	1.17856	L-Erythrulose	119.035	51.8	120.042	2.31864	C4H8O4	[M-H]-	Organooxygen compounds	Carbohydrates and carbohydrate conjugates	C02045		533-50-6/496-55-9	HMDB0006293	Nodiff
M119T575.neg	3.25269e+07	4.11893e+07	1.26632	0.340636	0.6084	0.883415	4.27802e+06	6.46687e+07	2.96867e+07	4.42828e+07	1.0415e+07	4.18302e+07	6.40161e+07	1.14178e+07	3.39073e+07	1.12885e+07	3.59928e+07	9.05135e+07	0.394138	3-Methylthiopropionic acid	118.927	574.9	120.025	17.7605	C4H8O2S	[M-H]-	Fatty Acyls	Fatty acids and conjugates	C08276	Energy metabolism; Amino acid metabolism	646-01-5	HMDB0001527	Nodiff
M120T50.pos	8.21064e+08	1.72066e+08	0.209565	-2.25453	0.298072	0.758241	4.14783e+09	8.74602e+07	2.7982e+08	6.47957e+07	2.70704e+08	7.57806e+07	5.69558e+08	5.97783e+07	4.29087e+07	2.33869e+07	7.51328e+07	2.61634e+08	0.950077	L-Threonine	120.066	50.5	119.058	0.199891	C4H9NO3	[M+H]+	Carboxylic acids and derivatives	Amino acids, peptides, and analogues	C00188	Metabolism of cofactors and vitamins; Membrane transport; Digestive system; Translation; Amino acid metabolism	72-19-5	HMDB0000167	Nodiff
M121T270.neg	2.69236e+07	3.1668e+07	1.17622	0.234154	0.199883	0.731951	2.55426e+07	1.51957e+07	3.19692e+07	2.90721e+07	2.7279e+07	3.24831e+07	2.92401e+07	3.28888e+07	2.91653e+07	2.73122e+07	4.124e+07	3.01617e+07	1.25023	Phenylethylamine	121.029	269.8	121.089	5.2182	C8H11N	[M]-	Benzene and substituted derivatives	Phenethylamines	C05332	Amino acid metabolism	64-04-0	HMDB0012275	Nodiff
M123T278.pos	781432	931107	1.19154	0.252826	0.590414	0.912473	1.05438e+06	435038	698830	1.31076e+06	604564	585017	1.15948e+06	286765	961410	933846	1.05142e+06	1.19372e+06	0.556354	3-Hydroxybenzaldehyde	123.044	277.7	122.037	0.690747	C7H6O2	[M+H]+			C03067		100-83-4		Nodiff
M123T480.pos	4.32301e+06	3.46785e+06	0.802184	-0.317994	0.747037	0.957983	1.15093e+07	3.13138e+06	4.00922e+06	4.45798e+06	835318	1.99481e+06	5.09491e+06	347394	2.75269e+06	3.89038e+06	4.22222e+06	4.49949e+06	0.249038	Niacinamide	123.092	479.6	122.048	2.70179	C6H6N2O	[M+H]+	Pyridines and derivatives	Pyridinecarboxylic acids and derivatives	C00153	Metabolism of cofactors and vitamins; Digestive system	98-92-0	HMDB0001406	Nodiff
M123T66.pos	4.13682e+07	6.71083e+07	1.62222	0.69797	0.180575	0.659423	1.05844e+08	1.28401e+07	4.06718e+07	5.2996e+07	1.45423e+07	2.13149e+07	1.23185e+08	3.3145e+07	2.36356e+07	7.43026e+07	9.67442e+07	5.16376e+07	1.13683	4-Hydroxybenzaldehyde	123.044	66.3	122.037	1.82048	C7H6O2	[M+H]+	Organooxygen compounds	Carbonyl compounds	C00633		123-08-0	HMDB0011718	Nodiff
M124T537.pos	3.65581e+08	3.95845e+08	1.08278	0.114743	0.367704	0.801223	1.01697e+09	1.91832e+08	2.52712e+08	2.34928e+08	2.70559e+08	2.26485e+08	4.8886e+08	4.94294e+08	2.85932e+08	4.17732e+08	3.89216e+08	2.99034e+08	0.761902	3-Hydroxybenzyl alcohol glucoside	124.086	536.6	124.052	5.02801	C7H8O2	[M]+	Organooxygen compounds	Carbohydrates and carbohydrate conjugates	C03351		143995-98-6 / 620-24-6	HMDB0038331	Nodiff
M124T62.pos	2.72299e+06	6.12806e+06	2.25049	1.17024	0.0319686	0.378954	780596	1.97095e+06	2.26729e+06	2.9047e+06	3.72626e+06	4.68812e+06	2.41027e+06	7.14604e+06	3.69805e+06	8.41945e+06	9.81541e+06	5.2791e+06	1.73366	Nicotinic acid	124.04	61.9	123.032	0.00083812	C6H5NO2	[M+H]+	Pyridines and derivatives	Pyridinecarboxylic acids and derivatives	C00253	Metabolism of cofactors and vitamins; Infectious disease: bacterial	59-67-6	HMDB0001488	Up
M124T678.pos	1.96848e+09	2.50497e+09	1.27254	0.347712	0.0958635	0.53886	2.25342e+09	1.39849e+09	1.50267e+09	1.8279e+09	2.00722e+09	2.82118e+09	3.04734e+09	3.26538e+09	2.49115e+09	2.15214e+09	2.002e+09	2.07181e+09	1.36453	Picolinic acid	124.086	678.2	123.032	0.710349	C6H5NO2	[M+H]+	Pyridines and derivatives	Pyridinecarboxylic acids and derivatives	C10164	Amino acid metabolism	98-98-6 / 14639-25-9	HMDB0002243	Nodiff
M126T51.pos	3.90744e+08	5.85927e+08	1.49952	0.5845	0.0364563	0.394298	2.742e+08	3.55583e+08	3.2289e+08	3.34261e+08	4.64844e+08	5.92683e+08	3.9168e+08	8.9152e+08	5.11261e+08	6.66727e+08	6.06908e+08	4.47468e+08	1.66141	Taurine	126.022	51.4	125.015	0.983954	C2H7NO3S	[M+H]+	Organic sulfonic acids and derivatives	Organosulfonic acids and derivatives	C00245	Membrane transport; Metabolism of other amino acids; Lipid metabolism; Signaling molecules and interaction; Energy metabolism	107-35-7	HMDB0000251	Up
M126T73.pos	6.54597e+06	1.65554e+07	2.52909	1.33862	0.0735274	0.495739	2.134e+07	1.45294e+06	1.63537e+06	3.44273e+06	6.57766e+06	4.82717e+06	1.71809e+07	5.19793e+07	8.03588e+06	7.41761e+06	7.40335e+06	7.31526e+06	1.44401	Ciliatine	125.986	72.9	125.024	1.00399	C2H8NO3P	[M+H]+	Organic phosphonic acids and derivatives	Organic phosphonic acids	C03557	Membrane transport; Metabolism of other amino acids	2041-14-7	HMDB0011747	Nodiff
M127T88.pos	3.1687e+06	3.04678e+06	0.961523	-0.0566068	0.827009	0.975058	1.76564e+06	4.45094e+06	1.88399e+06	4.90976e+06	1.83127e+06	4.17063e+06	3.17506e+06	5.22217e+06	2.70937e+06	2.09972e+06	917495	4.15687e+06	0.168731	Thymine	127.05	87.9	126.043	0.78709	C5H6N2O2	[M+H]+	Diazines	Pyrimidines and pyrimidine derivatives	C00178	Nucleotide metabolism	65-71-4	HMDB0000262	Nodiff
M128T47.neg	2.44171e+08	3.32691e+08	1.36253	0.44629	0.229395	0.74153	2.65925e+08	2.97247e+08	1.60443e+08	2.46159e+08	2.6813e+08	2.27124e+08	2.95422e+08	3.65058e+08	2.47763e+08	4.96225e+08	4.38818e+08	1.52859e+08	1.16945	Pyroglutamic acid	128.035	47.4	129.043	1.70233	C5H7NO3	[M-H]-	Carboxylic acids and derivatives	Amino acids, peptides, and analogues	C01879	Metabolism of other amino acids	98-79-3	HMDB0000267	Nodiff
M128T584.neg	2.91537e+07	3.17966e+07	1.09065	0.125192	0.738352	0.928001	5.20906e+07	8.27877e+06	1.08495e+07	8.18278e+06	3.97442e+07	5.57767e+07	9.95131e+06	5.64562e+07	3.28004e+07	1.88393e+07	1.11386e+07	6.15937e+07	0.23977	Cyanuric acid	128.01	583.5	129.017	1.74986	C3H3N3O3	[M-H]-	Triazines	1,3,5-triazines	C06554		108-80-5/504-19-8	HMDB0041861	Nodiff
M129T44.pos	2.48147e+07	3.51833e+07	1.41784	0.503693	0.27757	0.740107	4.12365e+06	2.61847e+07	4.47859e+07	2.73589e+07	1.72443e+07	2.91909e+07	1.45461e+07	2.81351e+07	4.62612e+07	6.10788e+07	3.46075e+07	2.64711e+07	0.96963	1,1-Dimethylbiguanide	129.102	44.3	129.101	0.0520042	C4H11N5	[M]+	Organonitrogen compounds	Guanidines	C07151	Signal transduction; Aging; Digestive system	1115-70-4 / 657-24-9	HMDB0001921	Nodiff
M129T46.neg	8.17206e+06	1.09315e+07	1.33767	0.419717	0.32808	0.792743	1.8856e+07	8.93772e+06	6.83004e+06	3.24724e+06	1.01829e+07	978472	1.32395e+07	1.48942e+07	1.57241e+07	9.49247e+06	9.24694e+06	2.99168e+06	0.923874	Itaconate	129.019	45.9	130.027	1.36413	C5H6O4	[M-H]-	Fatty Acyls	Fatty acids and conjugates	C00490		c("97-65-4", "2964-00-3")	HMDB0002092	Nodiff
M129T479.pos	9.4664e+06	1.00729e+07	1.06406	0.089585	0.0625143	0.467878	1.00802e+07	8.69213e+06	9.88482e+06	9.78504e+06	8.89465e+06	9.46158e+06	9.87505e+06	1.06941e+07	9.79316e+06	9.5737e+06	1.02168e+07	1.02842e+07	1.53995	Oxoglutaric acid	129.127	478.7	146.022	2.02777	C5H6O5	[M+H-H2O]+	Keto acids and derivatives	Gamma-keto acids and derivatives	C00026	Metabolism of other amino acids; Signal transduction; Nervous system; Endocrine system; Excretory system; Carbohydrate metabolism; Amino acid metabolism	328-50-7 / 64-15-3	HMDB0000208	Nodiff
M130T184.pos	9.75552e+06	1.01045e+07	1.03577	0.0507027	0.869829	0.982356	1.45466e+07	1.60944e+07	7.30167e+06	6.60441e+06	6.66018e+06	7.32586e+06	6.4811e+06	1.01885e+07	1.94208e+07	7.39619e+06	8.15022e+06	8.99009e+06	0.153645	Isoquinoline	130.065	183.7	129.058	2.49105	C9H7N	[M+H]+	Isoquinolines and derivatives		C06323		119-65-3	HMDB0034244	Nodiff
M130T44.pos	6.04247e+08	5.468e+08	0.904927	-0.144127	0.618743	0.922597	1.3672e+07	7.68877e+08	7.01011e+08	5.89604e+08	7.24382e+08	8.27939e+08	3.26197e+08	6.38849e+08	7.62809e+08	5.49376e+08	5.29289e+08	4.74279e+08	0.460397	Pipecolic acid	130.087	44.4	129.079	0.00788478	C6H11NO2	[M+H]+	Carboxylic acids and derivatives	Amino acids, peptides, and analogues	C00408	Amino acid metabolism	535-75-1 / 3105-95-1	HMDB0000070	Nodiff
M130T58.pos	3.74397e+07	2.01806e+07	0.539016	-0.891599	0.0874715	0.521394	8.03565e+07	3.34198e+07	3.95677e+07	3.14205e+07	2.59053e+07	1.39687e+07	3.33546e+07	1.27953e+07	1.33276e+07	1.14731e+07	2.34992e+07	2.6634e+07	1.44088	(2E)-Decenoyl-ACP	130.086	58	129.079	0.76872	C6H11NO2	[M+H]+	Carboxylic acids and derivatives	Amino acids, peptides, and analogues	C03969		52-52-8	HMDB0062225	Nodiff
M130T678.pos	7.5008e+06	6.52849e+06	0.870372	-0.200295	0.528403	0.887577	1.21826e+07	5.89514e+06	3.11197e+06	4.47148e+06	1.37805e+07	5.5631e+06	6.37396e+06	3.40299e+06	3.37268e+06	1.84623e+07	2.82541e+06	4.73362e+06	0.558772	Quinoline	130.159	678.5	129.058	1.26348	C9H7N	[M+H]+	Quinolines and derivatives		C06413		91-22-5	HMDB0033731	Nodiff
M131T107.pos	4.6418e+07	5.57943e+07	1.202	0.265434	0.533324	0.889548	4.49567e+07	5.29467e+07	3.38175e+07	6.61822e+07	3.7392e+07	4.32127e+07	5.64989e+07	4.05039e+07	8.99892e+07	3.14881e+07	3.6639e+07	7.96465e+07	0.635078	cis-4-Hydroxy-L-proline	130.967	107.3	131.058	0.244389	C5H9NO3	[M]+			C01015		618-27-9 / 51-35-4 / 30724-02-8		Nodiff
M131T309.pos	1.72539e+06	1.33645e+06	0.774576	-0.368521	0.678426	0.942335	4.49017e+06	941817	1.55968e+06	1.83343e+06	805677	721584	1.88896e+06	328765	1.10698e+06	1.47592e+06	1.53584e+06	1.68221e+06	0.334462	Ketoleucine	131.086	309.1	130.063	27.7678	C6H10O3	[M+H]+	Keto acids and derivatives	Short-chain keto acids and derivatives	C00233	Amino acid metabolism	816-66-0	HMDB0000695	Nodiff
M131T49.neg	1.80301e+07	4.01836e+07	2.22869	1.1562	0.0449444	0.643426	2.62662e+07	7.79675e+06	4.63838e+06	1.83368e+07	1.63081e+07	3.48346e+07	2.87085e+07	5.76572e+07	1.57561e+07	6.18712e+07	5.27648e+07	2.43435e+07	1.73991	L-Asparagine	131.046	49.2	132.054	1.34304	C4H8N2O3	[M-H]-	Carboxylic acids and derivatives	Amino acids, peptides, and analogues	C00152	Cancer: overview; Amino acid metabolism; Digestive system; Translation	2058-58-4	HMDB0033780	Up
M131T51_1.neg	1.89109e+07	1.75625e+07	0.928695	-0.106723	0.686734	0.908522	6.0182e+07	9.51851e+06	8.73894e+06	1.81198e+07	8.9259e+06	7.98023e+06	1.1043e+07	1.82771e+07	1.0545e+07	2.86885e+07	2.66632e+07	1.0158e+07	0.49333	Glutaric acid	131.035	50.6	132.042	1.34315	C5H8O4	[M-H]-	Carboxylic acids and derivatives	Dicarboxylic acids and derivatives	C00489	Lipid metabolism; Amino acid metabolism	110-94-1	HMDB0000661	Nodiff
M131T79.pos	8.4487e+07	9.75648e+07	1.15479	0.207631	0.351927	0.789043	6.29563e+07	7.12537e+07	1.16962e+08	7.39711e+07	8.92831e+07	9.24956e+07	5.86025e+07	8.40602e+07	1.06247e+08	1.08592e+08	1.21509e+08	1.06378e+08	0.84518	Leucine	130.967	78.9	131.095	0.0406383	C6H13NO2	[M]+	Carboxylic acids and derivatives	Amino acids, peptides, and analogues	C16439		328-39-2	HMDB0062203	Nodiff
M132T171.pos	5.95453e+07	3.2722e+07	0.549531	-0.863726	0.539125	0.892149	2.11664e+08	2.71358e+07	4.05063e+07	3.92143e+07	2.73535e+07	1.13977e+07	5.68148e+07	6.98898e+06	2.43941e+07	2.83413e+07	3.44088e+07	4.53843e+07	0.532997	L-Isoleucine	132.1	171.1	131.095	11.4301	C6H13NO2	[M+H]+	Carboxylic acids and derivatives	Amino acids, peptides, and analogues	C00407	Cancer: overview; Membrane transport; Digestive system; Translation; Amino acid metabolism	73-32-5	HMDB0000172	Nodiff
M132T250.pos	3.80123e+07	2.65315e+07	0.697972	-0.518759	0.804634	0.970085	1.03293e+08	2.75249e+07	3.98337e+07	5.14086e+06	3.25432e+07	1.97376e+07	3.16884e+07	8.75735e+06	2.92103e+07	2.83375e+07	4.21507e+07	1.90447e+07	0.282593	L-Leucine	132.1	249.6	131.095	14.9584	C6H13NO2	[M+H]+	Carboxylic acids and derivatives	Amino acids, peptides, and analogues	C00123	Cancer: overview; Membrane transport; Signal transduction; Digestive system; Translation; Amino acid metabolism	61-90-5	HMDB0000687	Nodiff
M132T364.pos	5.56955e+07	6.25252e+07	1.12263	0.166877	0.406335	0.823416	9.20771e+07	1.57966e+07	8.27884e+07	6.39442e+07	6.65392e+07	1.30274e+07	5.14832e+07	4.91724e+07	8.89842e+07	8.30267e+07	5.24147e+07	5.007e+07	0.749414	N,N-Diethylglycine	132.1	364.4	131.095	14.9584	C6H13NO2	[M+H]+			C16647				Nodiff
M132T46.neg	1.20182e+08	1.07591e+08	0.895231	-0.159668	0.94969	0.989652	3.45162e+08	2.55508e+07	6.13527e+07	7.30466e+07	1.08883e+08	1.07098e+08	1.38247e+08	3.29863e+07	4.06815e+07	1.22322e+08	1.58407e+08	1.52902e+08	0.153955	L-Aspartic acid	132.031	46.1	133.037	3.60522	C4H7NO4	[M-H]-	Carboxylic acids and derivatives	Amino acids, peptides, and analogues	C00049	Cancer: overview; Metabolism of cofactors and vitamins; Metabolism of other amino acids; Membrane transport; Digestive system; Signaling molecules and interaction; Translation; Amino acid metabolism	56-84-8	HMDB0000191	Nodiff
M132T51_2.pos	5.92995e+09	2.25612e+09	0.380462	-1.39417	0.0302011	0.373234	1.00615e+10	5.55186e+09	6.65321e+09	3.45108e+09	5.37771e+09	4.48434e+09	9.01767e+08	4.47045e+08	3.21524e+08	4.29106e+09	5.73504e+09	1.84029e+09	1.82356	Creatine	132.077	51.1	131.07	0.181712	C4H9N3O2	[M+H]+	Carboxylic acids and derivatives	Amino acids, peptides, and analogues	C00300	Amino acid metabolism	57-00-1	HMDB0000064	Down
M132T511.pos	1.59066e+07	6.06256e+06	0.381135	-1.39162	0.052756	0.444682	3.87229e+07	1.14512e+07	3.72125e+06	1.60111e+07	9.50847e+06	1.60246e+07	8.771e+06	6.60486e+06	3.12752e+06	1.10846e+07	3.29421e+06	3.49318e+06	1.57025	(R)-Pantolactone	131.534	511.1	130.063	0.00111366	C6H10O3	[M+H]+			C01012		599-04-2		Nodiff
M132T532.pos	4.00439e+07	2.4714e+07	0.617172	-0.696256	0.300255	0.760274	5.52758e+07	5.22813e+07	1.58809e+07	1.00193e+07	4.87333e+07	5.8073e+07	3.5749e+06	1.7487e+07	4.00431e+07	2.06341e+07	2.79953e+07	3.85495e+07	0.848091	N-Carbamoylputrescine	132.1	532.2	131.106	13.768	C5H13N3O	[M+H]+	Carboximidic acids and derivatives	Carboximidic acids	C00436	Amino acid metabolism	6851-51-0	HMDB0033458	Nodiff
M132T78.pos	4.70455e+07	4.51171e+07	0.95901	-0.0603823	0.80273	0.970085	3.92848e+07	5.44153e+07	2.00907e+07	2.50608e+07	1.06069e+08	3.73524e+07	1.03325e+08	1.61794e+07	3.62067e+07	1.68943e+07	5.79558e+07	4.01409e+07	0.244138	cis-4-Hydroxy-D-proline	131.974	78.3	131.058	0.379046	C5H9NO3	[M+H]+	Carboxylic acids and derivatives	Amino acids, peptides, and analogues	C03440	Amino acid metabolism	2584-71-6	HMDB0060460	Nodiff
M133T43.neg	3.61682e+07	2.12064e+07	0.586327	-0.770224	0.603917	0.882631	1.29291e+08	1.11839e+07	2.44881e+07	3.422e+07	8.7702e+06	9.05644e+06	4.92028e+07	3.58403e+06	9.07316e+06	1.72107e+07	2.7866e+07	2.03016e+07	0.388895	L-Malic acid	133.014	42.6	134.022	2.07496	C4H6O5	[M-H]-	Hydroxy acids and derivatives	Beta hydroxy acids and derivatives	C00149	Cancer: overview; Sensory system; Excretory system; Endocrine system; Carbohydrate metabolism; Cancer: specific types	97-67-6 / 6915-15-7	HMDB0000156	Nodiff
M133T44.pos	3.45089e+07	8.24145e+07	2.38821	1.25593	0.0188038	0.342087	5.33693e+07	1.96295e+07	1.24361e+07	2.16676e+07	3.55239e+07	6.4427e+07	7.64269e+07	1.09163e+08	3.18888e+07	1.23627e+08	9.84653e+07	5.49152e+07	1.82191	Ornithine	133.097	44.4	132.09	0.931649	C5H12N2O2	[M+H]+	Carboxylic acids and derivatives	Amino acids, peptides, and analogues	C00077	Amino acid metabolism; Membrane transport; Metabolism of other amino acids	3184-13-2/70-26-8	HMDB0000214	Up
M133T64_1.pos	4.06218e+08	3.62754e+08	0.893005	-0.16326	0.94144	0.991561	9.2314e+08	1.71433e+08	4.60783e+08	4.3855e+08	2.00314e+08	2.43086e+08	4.31412e+08	3.63207e+08	4.19169e+08	3.78331e+08	1.7508e+08	4.09328e+08	0.0698698	5,6-Dihydro-5-fluorouracil	133.032	63.7	132.034	0.00680574	C4H5FN2O2	[M+H]+	Diazines	Pyrimidines and pyrimidine derivatives	C16630	Xenobiotics biodegradation and metabolism	696-06-0	HMDB0060402	Nodiff
M134T67.neg	776593	746104	0.96074	-0.0577818	0.680145	0.906356	580603	757793	708789	893487	878187	840701	768943	609661	862826	659661	828892	746642	0.329538	Adenine	134.048	67	135.054	2.80497	C5H5N5	[M-H]-	Imidazopyrimidines	Purines and purine derivatives	C00147	Nucleotide metabolism	73-24-5	HMDB0000034	Nodiff
M135T291.neg	8.93524e+06	2.05662e+07	2.3017	1.2027	0.257952	0.752928	6.66934e+06	5.56146e+06	6.13414e+06	2.29896e+07	6.42151e+06	5.83537e+06	4.37984e+06	5.5801e+07	5.71858e+06	1.96675e+07	7.42712e+06	3.04033e+07	1.0637	o-Toluate	135.045	291.1	136.052	2.04376	C8H8O2	[M-H]-	Benzene and substituted derivatives	Benzoic acids and derivatives	C07215		118-90-1	HMDB0002340	Nodiff
M135T47_1.neg	1.78185e+08	1.26619e+08	0.710604	-0.492883	0.687979	0.908839	2.87637e+08	2.06626e+08	2.20429e+08	1.80201e+07	2.10246e+08	1.26151e+08	1.82969e+08	2.0414e+08	5.19956e+07	1.15646e+08	1.49052e+08	5.59111e+07	0.469927	Phenyl acetate	134.893	47.3	136.052	1.51758	C8H8O2	[M-H]-			C00548		122-79-2		Nodiff
M135T561.pos	1.109e+07	1.09896e+07	0.99094	-0.0131301	0.699993	0.946593	2.29332e+07	9.13448e+06	8.95246e+06	9.2459e+06	9.43888e+06	6.83531e+06	1.2333e+07	1.11342e+07	9.39866e+06	1.15409e+07	1.17236e+07	9.80703e+06	0.319719	Chavicol	135.081	561.5	134.073	0.00360996	C9H10O	[M+H]+	Phenols	1-hydroxy-2-unsubstituted benzenoids	C16930		501-92-8	HMDB0034107	Nodiff
M135T662.neg	1.51424e+07	6.80163e+06	0.449178	-1.15464	0.42131	0.825752	4.46768e+07	2.70248e+07	5.16358e+06	5.39911e+06	4.53763e+06	4.05249e+06	8.84521e+06	4.2311e+06	4.60479e+06	6.07958e+06	4.25203e+06	1.27971e+07	0.814917	N,N-Dimethyl-1,4-phenylenediamine	134.895	662.1	136.1	11.8334	C8H12N2	[M-H]-			C04203		99-98-9		Nodiff
M135T82.neg	1.99917e+06	1.93398e+06	0.967388	-0.0478337	0.920803	0.982792	750166	782278	601891	4.08546e+06	3.64798e+06	2.12727e+06	3.13488e+06	676351	2.20236e+06	500069	2.80616e+06	2.28404e+06	0.153465	Threonate	135.031	82	136.037	10.1902	C4H8O5	[M-H]-	Organooxygen compounds	Carbohydrates and carbohydrate conjugates	C01620	Carbohydrate metabolism	c("7306-96-9", "3909-12-4", "70753-61-6")	HMDB0000943	Nodiff
M136T265.pos	1.50805e+06	1.41709e+06	0.939683	-0.0897537	0.943692	0.991561	380758	549870	1.53841e+06	3.5346e+06	1.87987e+06	1.16479e+06	495791	1.42283e+06	1.52296e+06	550941	2.22553e+06	2.28448e+06	0.147483	2-Phenylacetamide	136.076	265.3	135.068	1.54393	C8H9NO	[M+H]+	Benzene and substituted derivatives	Phenylacetamides	C02505	Amino acid metabolism	103-81-1	HMDB0010715	Nodiff
M136T664.pos	3.33936e+06	3.70896e+06	1.11068	0.151444	0.60514	0.91775	896684	3.73287e+06	5.16761e+06	2.1979e+06	3.70082e+06	4.34026e+06	5.67296e+06	4.67847e+06	2.34862e+06	1.9204e+06	4.51144e+06	3.12188e+06	0.383511	L-Homocysteine	136.048	664.5	135.035	2.52443	C4H9NO2S	[M+H]+			C00155	Energy metabolism; Amino acid metabolism; Immune system	6027-13-0		Nodiff
M136T685_1.neg	5.70199e+07	6.56075e+07	1.15061	0.202396	0.447847	0.838962	3.071e+07	1.00354e+07	3.11532e+07	5.63702e+07	8.07438e+07	1.33107e+08	9.66932e+07	8.59176e+07	5.59432e+07	7.48886e+07	2.22946e+07	5.7908e+07	0.709264	Phenylacetic acid	135.971	684.9	136.052	10.9987	C8H8O2	[M]-	Benzene and substituted derivatives		C07086	Amino acid metabolism	103-82-2	HMDB0000209	Nodiff
M137T60.neg	1.07758e+07	5.59339e+06	0.519069	-0.946001	0.102861	0.67874	6.72146e+06	5.62092e+06	6.30388e+06	5.73673e+06	2.08016e+07	1.94702e+07	5.41637e+06	9.83331e+06	5.94221e+06	4.61889e+06	3.27305e+06	4.4765e+06	1.50219	Urocanic acid	137.036	59.7	138.043	0.729736	C6H6N2O2	[M-H]-	Azoles	Imidazoles	C00785	Amino acid metabolism	104-98-3	HMDB0000301	Nodiff
M137T61.pos	2.16572e+08	2.60114e+08	1.20105	0.264297	0.306383	0.765976	7.17362e+07	2.82591e+08	6.71564e+07	1.96302e+08	3.72234e+08	3.09413e+08	2.65161e+08	3.26205e+08	1.5785e+08	2.68115e+08	2.72339e+08	2.71016e+08	0.93413	Hypoxanthine	137.046	61.4	136.038	0.0966976	C5H4N4O	[M+H]+	Imidazopyrimidines	Purines and purine derivatives	C00262	Nucleotide metabolism	68-94-0	HMDB0000157	Nodiff
M137T83.pos	7.6274e+06	2.09057e+07	2.74087	1.45463	0.21551	0.688889	1.16499e+06	1.68339e+06	862202	2.17953e+06	1.12018e+07	2.86724e+07	1.81024e+07	2.96826e+07	4.37037e+07	1.34212e+06	1.2617e+06	3.13416e+07	1.07523	allopurinol	137.046	83.1	136.039	0.000164142	C5H4N4O	[M+H]+			C06816		315-30-0		Nodiff
M138T334.neg	1.38207e+07	7.85186e+06	0.568123	-0.815726	0.368777	0.81182	2.90622e+07	6.60612e+06	2.87393e+07	4.89082e+06	6.41359e+06	7.21224e+06	1.01503e+07	2.82256e+06	7.63887e+06	1.20762e+07	7.0703e+06	7.35297e+06	0.791752	4-Nitrophenol	138.02	334	139.027	1.44907	C6H5NO3	[M-H]-	Phenols	Nitrophenols	C00870		100-02-7	HMDB0001232	Nodiff
M138T343.neg	7.91857e+06	5.00088e+06	0.631539	-0.663057	0.488437	0.847539	2.48671e+06	2.6527e+06	2.46261e+06	1.74692e+07	1.22645e+07	1.01757e+07	2.86957e+06	2.72689e+06	1.04527e+07	8.72904e+06	2.79579e+06	2.4313e+06	0.521735	6-Hydroxynicotinic acid	138.02	343.4	139.027	1.68802	C6H5NO3	[M-H]-	Pyridines and derivatives	Pyridinecarboxylic acids and derivatives	C01020	Metabolism of cofactors and vitamins	5006-66-6	HMDB0002658	Nodiff
M139T394.pos	4.40223e+06	2.46842e+06	0.560721	-0.834644	0.819658	0.973536	1.64335e+07	1.85447e+06	947655	3.31456e+06	2.59256e+06	1.27066e+06	3.32308e+06	2.40646e+06	1.39544e+06	2.01473e+06	2.11992e+06	3.5509e+06	0.183737	Isophorone	139.112	394.4	138.105	0.891369	C9H14O	[M+H]+	Carbonyl compounds	Ketones	C14743		78-59-1	HMDB0031195	Nodiff
M140T80.pos	1.7416e+07	5.05375e+06	0.290179	-1.78498	0.160941	0.634936	6.29463e+06	3.54505e+07	3.48355e+06	1.56017e+06	3.16472e+07	2.60597e+07	2.4298e+06	3.85071e+06	1.7772e+06	2.69617e+06	1.45321e+07	5.03647e+06	1.22667	Acetylphosphate	139.982	79.8	139.988	0.0154351	C2H5O5P	[M]+	Organic phosphoric acids and derivatives	Phosphate esters	C00227	Carbohydrate metabolism; Metabolism of other amino acids	590-54-5	HMDB0001494	Nodiff
M142T215.pos	4.01377e+07	6.48814e+07	1.61647	0.692846	0.0186941	0.342087	7.02309e+07	2.16506e+07	3.19667e+07	3.62582e+07	3.91472e+07	4.15728e+07	5.26481e+07	7.08538e+07	5.24602e+07	7.66636e+07	8.11565e+07	5.55062e+07	1.8966	O-Phosphoethanolamine	141.957	214.8	141.019	13.9423	C2H8NO4P	[M+H]+	Organic phosphoric acids and derivatives	Phosphate esters	C00346	Lipid metabolism; Signal transduction	1071-23-4	HMDB0000224	Up
M144T183.pos	4.07798e+06	4.47812e+06	1.09812	0.135037	0.377383	0.808979	2.99272e+06	4.75275e+06	4.9904e+06	5.18588e+06	3.0369e+06	3.50925e+06	4.27752e+06	5.25763e+06	4.96074e+06	4.29601e+06	3.47517e+06	4.60164e+06	0.780664	Tryptophanol	144.081	183.2	161.084	29.3863	C10H11NO	[M+H-H2O]+	Indoles and derivatives	Indoles	C00955	Amino acid metabolism	526-55-6	HMDB0003447	Nodiff
M144T95.neg	3.55687e+07	2.68204e+07	0.754045	-0.407278	0.756761	0.932659	3.828e+06	4.24753e+07	1.25783e+07	2.36763e+07	5.21334e+07	7.87211e+07	7.4184e+06	8.36753e+06	6.05369e+07	3.25813e+07	1.44415e+07	3.75768e+07	0.30761	Spermidine	143.916	94.6	145.158	8.29365	C7H19N3	[M-H]-	Organonitrogen compounds	Amines	C00315	Amino acid metabolism; Membrane transport; Metabolism of other amino acids; Digestive system	124-20-9	HMDB0001257	Nodiff
M145T55.neg	3.46402e+07	1.87109e+07	0.540151	-0.888566	0.658556	0.90083	1.86019e+08	2.38409e+06	2.59424e+06	1.35175e+07	1.61367e+06	1.71298e+06	5.81292e+07	1.67035e+06	2.88905e+07	1.79244e+06	1.13306e+07	1.04524e+07	0.445627	L-Lysine	145.099	54.7	146.106	1.90216	C6H14N2O2	[M-H]-	Carboxylic acids and derivatives	Amino acids, peptides, and analogues	C00047	Metabolism of cofactors and vitamins; Membrane transport; Digestive system; Translation; Amino acid metabolism	56-87-1	HMDB0000182	Nodiff
M145T641.pos	5.00544e+08	4.43213e+08	0.885463	-0.175496	0.340714	0.783594	7.09328e+08	5.20051e+08	4.54671e+08	3.9469e+08	4.87124e+08	4.374e+08	4.2712e+08	3.40874e+08	3.61893e+08	3.77196e+08	5.09086e+08	6.43112e+08	0.812798	3-Hydroxymethylglutaric acid	144.982	641.5	162.053	0.477901	C6H10O5	[M+H-H2O]+	Fatty Acyls	Fatty acids and conjugates	C03761		503-49-1	HMDB0000355	Nodiff
M146T168.pos	1.14667e+07	1.30063e+07	1.13426	0.181756	0.824319	0.974531	2.3392e+07	7.93242e+06	5.94264e+06	1.06675e+07	1.93593e+07	1.50639e+06	810898	2.1333e+06	6.57082e+06	2.15315e+07	2.82688e+07	1.87222e+07	0.123073	2-Dehydropantoate	146.06	167.6	146.058	0.0338082	C6H10O4	[M]+			C00966	Metabolism of cofactors and vitamins	470-30-4		Nodiff
M146T203.pos	5.22285e+06	7.1581e+06	1.37054	0.45474	0.292448	0.753149	525172	5.66354e+06	9.39002e+06	5.49236e+06	3.92695e+06	6.33905e+06	3.4061e+06	6.22736e+06	9.15302e+06	1.17638e+07	6.99333e+06	5.40503e+06	0.944671	Quinolin-2-ol	146.06	203.3	145.053	1.53361	C9H7NO	[M+H]+			C06338		c("70254-42-1", "59-31-4")		Nodiff
M146T310.neg	1.21763e+08	4.67626e+07	0.384048	-1.38064	0.762108	0.93487	4.80515e+07	3.67607e+06	6.09698e+06	6.25679e+08	3.4315e+07	1.27571e+07	8.17655e+06	3.86064e+07	2.43832e+06	1.04057e+08	1.22785e+08	4.51216e+06	0.0917689	N-Methyl-D-aspartic acid	146	310.3	147.053	7.10683	C5H9NO4	[M-H]-	Carboxylic acids and derivatives	Amino acids, peptides, and analogues	C12269		6384-92-5	HMDB0002393	Nodiff
M146T44.pos	1.80769e+07	1.93635e+07	1.07117	0.0991942	0.78178	0.96722	7.65978e+06	1.97668e+07	3.01294e+07	1.3728e+07	1.82992e+07	1.88785e+07	9.80534e+06	1.2111e+07	3.00034e+07	2.64334e+07	1.99599e+07	1.78683e+07	0.265921	L-Glutamine	146.081	44.1	146.069	0.0658478	C5H10N2O3	[M]+	Carboxylic acids and derivatives	Amino acids, peptides, and analogues	C00064	Cancer: overview; Metabolism of cofactors and vitamins; Membrane transport; Nervous system; Excretory system; Digestive system; Carbohydrate metabolism; Nucleotide metabolism; Translation; Amino acid metabolism; Energy metabolism	5959-95-5	HMDB0003423	Nodiff
M146T46.neg	2.67253e+08	1.91109e+08	0.715087	-0.483809	0.238569	0.746773	1.16101e+08	2.80126e+08	1.59061e+08	2.78477e+08	4.26178e+08	3.43574e+08	1.44643e+08	9.12123e+07	1.76993e+08	2.50554e+08	4.02187e+08	8.1064e+07	0.96364	L-Glutamic acid	146.046	46.4	147.053	2.57453	C5H9NO4	[M-H]-	Carboxylic acids and derivatives	Amino acids, peptides, and analogues	C00025	Neurodegenerative disease; Biosynthesis of other secondary metabolites; Translation; Substance dependence; Cellular community - eukaryotes; Energy metabolism; Metabolism of other amino acids; Excretory system; Carbohydrate metabolism; Cancer: overview; Membrane transport; Cell growth and death; Signal transduction; Nervous system; Digestive system; Environmental adaptation; Amino acid metabolism;…	56-86-0	HMDB0000148	Nodiff
M146T53.pos	4.74467e+06	5.90758e+06	1.2451	0.31626	0.274205	0.737309	5.79165e+06	3.1772e+06	4.50944e+06	7.34912e+06	4.10061e+06	3.53999e+06	6.63559e+06	2.91839e+06	5.63066e+06	6.24357e+06	6.20355e+06	7.81374e+06	1.02314	(S)-5-Amino-3-oxohexanoate	146.081	52.6	145.074	0.848843	C6H11NO3	[M+H]+	Carboxylic acids and derivatives	Amines	C03656	Amino acid metabolism	19355-90-9	HMDB0012131	Nodiff
M146T55_2.pos	3.86269e+07	4.61219e+07	1.19403	0.255843	0.537634	0.891709	1.18211e+07	4.63051e+07	5.58107e+07	3.82587e+07	3.61546e+07	4.34115e+07	2.39364e+07	7.0396e+07	6.8398e+07	4.71016e+07	4.17296e+07	2.51696e+07	0.53099	Acetylcholine	146.118	55	146.118	0.68438	C7H16NO2	[M+H]+	Organonitrogen compounds	Quaternary ammonium salts	C01996	Nervous system; Signal transduction; Sensory system; Endocrine system; Digestive system; Lipid metabolism; Neurodegenerative disease; Signaling molecules and interaction; Substance dependence; Cell motility	51-84-3	HMDB0000895	Nodiff
M146T56.pos	1.7848e+07	1.51042e+07	0.846268	-0.240813	0.698453	0.9464	3.4849e+07	1.06702e+07	2.3798e+07	1.56671e+07	1.03701e+07	1.17337e+07	2.07304e+07	1.64871e+07	1.21574e+07	1.18416e+07	1.01279e+07	1.92808e+07	0.383408	4-Guanidinobutanoic acid	146.093	55.7	145.085	0.848777	C5H11N3O2	[M+H]+	Carboxylic acids and derivatives	Amino acids, peptides, and analogues	C01035	Amino acid metabolism	463-00-3	HMDB0003464	Nodiff
M148T290.pos	1.24512e+06	1.81086e+06	1.45437	0.540396	0.07189	0.492006	1.84179e+06	872777	1.0427e+06	819875	1.58867e+06	1.30489e+06	1.28461e+06	2.73573e+06	1.50133e+06	2.41982e+06	1.5947e+06	1.329e+06	1.43862	3-Methyloxindole	148.076	289.9	147.068	0.837409	C9H9NO	[M+H]+			C02366		1504-06-9		Nodiff
M148T50_2.pos	2.32335e+07	2.31434e+07	0.996124	-0.0056026	0.926762	0.990557	3.42543e+07	1.67035e+07	2.55316e+07	4.3038e+07	9.35847e+06	1.05149e+07	3.96547e+07	9.92092e+06	1.46859e+07	1.4297e+07	3.13261e+07	2.89758e+07	0.10833	(R) 2,3-Dihydroxy-3-methylvalerate	148.08	50.3	148.074	0.708944	C6H12O4	[M]+	Fatty Acyls	Fatty acids and conjugates	C06007	Amino acid metabolism	562-43-6	HMDB0012140	Nodiff
M148T61.neg	1.03277e+08	6.66708e+07	0.645552	-0.631396	0.794557	0.94401	3.48706e+08	4.38737e+07	7.13568e+07	9.54049e+07	3.84619e+07	2.18597e+07	1.23637e+08	2.80035e+07	3.62521e+07	5.7768e+07	8.86498e+07	6.57144e+07	0.150102	L-Methionine	148.044	61	149.051	0.675475	C5H11NO2S	[M-H]-	Carboxylic acids and derivatives	Amino acids, peptides, and analogues	C00073	Cancer: overview; Amino acid metabolism; Digestive system; Translation	63-68-3	HMDB0000696	Nodiff
M149T128.neg	1.10203e+06	1.12039e+06	1.01666	0.0238327	0.649635	0.896172	1.59634e+06	733382	1.5284e+06	736478	1.68022e+06	337358	77047.8	2.405e+06	1.35944e+06	1.26585e+06	364683	1.2503e+06	0.390787	(R)-4-Hydroxymandelate	149.025	127.6	168.042	5.30116	C8H8O4	[M-H2O-H]-	Benzene and substituted derivatives	1-hydroxy-2-unsubstituted benzenoids	C05343				Nodiff
M149T33.pos	2.40513e+08	1.89048e+08	0.786021	-0.34736	0.61388	0.920457	3.62067e+07	2.25165e+08	3.34569e+08	3.11183e+08	3.19167e+08	2.16785e+08	2.53621e+08	3.07147e+08	2.29094e+08	1.36542e+08	1.79366e+08	2.85181e+07	0.499472	L-2-Hydroxyglutaric acid	148.976	33.3	148.037	5.60843	C5H8O5	[M+H]+	Fatty Acyls	Fatty acids and conjugates	C03196	Amino acid metabolism	13095-48-2	HMDB0000694	Nodiff
M149T70.pos	6.8648e+07	8.27971e+07	1.20611	0.270362	0.39092	0.815362	4.26814e+07	4.83109e+07	6.29448e+07	6.61659e+07	1.28631e+08	6.31543e+07	1.16041e+08	6.11424e+07	7.27791e+07	4.30102e+07	9.29719e+07	1.10838e+08	0.750424	(S)-2-Methylmalate	149.06	70.2	148.037	15.5761	C5H8O5	[M+H]+			C02614		6236-09-05		Nodiff
M149T99.pos	5.27312e+07	7.32841e+07	1.38977	0.474843	0.125732	0.591566	4.24808e+07	6.05148e+07	5.44042e+07	4.64204e+07	4.65759e+07	6.59913e+07	5.53381e+07	1.14001e+08	5.19808e+07	4.67612e+07	9.86285e+07	7.29947e+07	1.29377	trans-Cinnamate	149.06	99	148.052	0.161009	C9H8O2	[M+H]+	Benzene and substituted derivatives	Carbonyl compounds	C00423	Amino acid metabolism; Metabolism of cofactors and vitamins	140-10-3		Nodiff
M150T682.neg	8.48716e+09	1.34152e+10	1.58064	0.660513	0.227743	0.741527	1.09551e+10	1.24258e+10	9.17393e+08	9.90788e+09	8.17968e+09	8.5371e+09	4.2136e+09	1.81684e+10	1.44711e+10	1.83903e+10	1.10394e+10	1.42083e+10	1.1032	L-Arabinose	149.993	681.7	150.053	1.36953	C5H10O5	[M]-	Organooxygen compounds	Carbohydrates and carbohydrate conjugates	C00259	Carbohydrate metabolism; Membrane transport	5328-37-0 / 147-81-9 / 87-72-9	HMDB0000646	Nodiff
M151T251.neg	444893	1.09488e+06	2.46099	1.29924	0.0336039	0.631958	918547	80624	411141	540558	472035	246453	2.01403e+06	488968	1.24823e+06	1.19904e+06	1.03452e+06	584464	1.91153	2',4'-Dihydroxyacetophenone	151.041	251.4	152.047	3.52146	C8H8O3	[M-H]-	Benzene and substituted derivatives	Acetophenones	C03663		89-84-9	HMDB0029659	Up
M151T288.neg	2.25067e+06	1.82435e+06	0.810583	-0.302969	0.0759734	0.65105	2.16657e+06	1.75524e+06	2.48544e+06	2.00769e+06	2.90473e+06	2.18433e+06	2.35565e+06	1.78663e+06	1.98581e+06	1.62606e+06	1.88267e+06	1.3093e+06	1.48563	3-Hydroxyphenylacetic acid	151.04	288	152.047	0.873172	C8H8O3	[M-H]-	Phenols	1-hydroxy-4-unsubstituted benzenoids	C05593	Amino acid metabolism	621-37-4	HMDB0000440	Nodiff
M151T66.neg	2.30633e+07	2.28617e+07	0.99126	-0.0126647	0.61792	0.887364	1.68907e+06	3.27066e+07	1.98465e+07	2.04569e+07	2.2757e+07	4.09239e+07	2.24601e+07	2.62437e+07	2.82014e+07	9.42209e+06	2.64398e+07	2.44034e+07	0.387634	Mandelic acid	151.04	66.4	152.047	0.503178	C8H8O3	[M-H]-	Benzene and substituted derivatives		C01984		90-64-2 / 17199-29-0	HMDB0000703	Nodiff
M151T73.neg	9.05626e+06	8.11489e+06	0.896053	-0.158345	0.649163	0.895878	3.77531e+06	1.54671e+07	1.07242e+07	1.01964e+07	9.58237e+06	4.59224e+06	6.3186e+06	5.33398e+06	1.91402e+07	4.32792e+06	9.03966e+06	4.52896e+06	0.410638	Xanthine	151.026	72.6	152.033	1.8275	C5H4N4O2	[M-H]-	Imidazopyrimidines	Purines and purine derivatives	C00385	Biosynthesis of other secondary metabolites; Nucleotide metabolism	69-89-6	HMDB0000292	Nodiff
M151T81.pos	7.01531e+06	9.38984e+06	1.33848	0.420592	0.285978	0.747695	1.69218e+06	7.34928e+06	1.21776e+07	8.05585e+06	4.92866e+06	7.88829e+06	4.54754e+06	7.89952e+06	1.18178e+07	1.55392e+07	9.00228e+06	7.53264e+06	0.953597	Acetaminophen	151.062	81.1	151.063	0.189414	C8H9NO2	[M]+	Phenols	1-hydroxy-2-unsubstituted benzenoids	C06804	Digestive system	103-90-2	HMDB0001859	Nodiff
M152T382.neg	6.49823e+06	6.07769e+06	0.935283	-0.0965249	0.00644334	0.615984	6.2e+06	6.43647e+06	6.54103e+06	6.67318e+06	6.6856e+06	6.45309e+06	5.75895e+06	6.36045e+06	6.18842e+06	6.25938e+06	5.91957e+06	5.97935e+06	2.08907	3-Hydroxyanthranilic acid	152.036	382.3	153.043	2.4731	C7H7NO3	[M-H]-	Benzene and substituted derivatives	Benzoic acids and derivatives	C00632	Amino acid metabolism	548-93-6	HMDB0001476	Down
M153T202.pos	2.42289e+06	3.30316e+06	1.36331	0.447118	0.27638	0.739347	520662	2.53034e+06	4.2572e+06	2.81711e+06	1.66762e+06	2.74438e+06	1.56166e+06	2.77684e+06	4.09769e+06	5.61306e+06	3.13134e+06	2.63833e+06	0.97242	3,4-Dihydroxyphenylacetaldehyde	153.055	202.3	152.047	0.810168	C8H8O3	[M+H]+	Benzene and substituted derivatives	Phenylacetaldehydes	C04043	Amino acid metabolism; Neurodegenerative disease	5707-55-1	HMDB0003791	Nodiff
M153T235.neg	425250	436868	1.02732	0.0388866	0.871721	0.97015	945739	203921	344040	446902	476360	134537	749846	274557	131630	585704	573325	306145	0.283681	Protocatechuic acid	153.02	234.8	154.027	2.40053	C7H6O4	[M-H]-	Benzene and substituted derivatives	Benzoic acids and derivatives	C00230		99-50-3	HMDB0001856	Nodiff
M153T296.pos	1.09107e+06	1.28594e+06	1.17861	0.237086	0.414555	0.829827	4.83469e+06	157303	229114	1.0202e+06	149941	155159	1.32113e+06	172594	127707	1.58912e+06	2.1045e+06	2.40061e+06	0.753566	4-Hydroxy-3-methoxy-benzaldehyde	153.055	295.6	152.047	0.810168	C8H8O3	[M+H]+	Phenols	Methoxyphenols	C00755		121-33-5	HMDB0012308	Nodiff
M153T561.pos	2.30714e+07	1.21966e+07	0.528643	-0.919635	0.912936	0.988188	9.34879e+07	1.14717e+07	1.38035e+07	1.42026e+07	4.11605e+06	1.3468e+06	2.18478e+07	5.07062e+06	1.06432e+07	8.78114e+06	1.04575e+07	1.6379e+07	0.0910262	Perillyl alcohol	153.091	561.4	152.12	0.243816	C10H16O	[M+H]+	Prenol lipids	Monoterpenoids	C02452		536-59-4 / 18457-55-1	HMDB0003634	Nodiff
M154T190.pos	4.96503e+08	4.09539e+08	0.824848	-0.2778	0.130854	0.598453	4.47799e+08	4.36151e+08	6.15248e+08	4.54017e+08	5.4499e+08	4.8081e+08	5.33027e+08	4.56562e+08	4.28456e+08	3.16271e+08	4.67965e+08	2.54955e+08	1.39064	2-Pyrocatechuic acid	154.042	190.2	154.027	0.887384	C7H6O4	[M]+	Benzene and substituted derivatives	Benzoic acids and derivatives	C00196		303-38-8	HMDB0000397	Nodiff
M154T559.pos	2.80982e+07	3.96808e+07	1.41222	0.497965	0.279256	0.741931	3.45912e+07	2.41593e+07	3.48977e+07	9.50382e+06	4.09529e+07	2.44841e+07	5.64692e+07	6.70948e+07	2.42011e+07	3.08224e+07	1.83115e+07	4.11859e+07	0.820337	psi-Pelletierine	154.123	559.3	153.115	1.45339	C9H15NO	[M+H]+	Piperidines	Piperidinones	C10865		552-70-5	HMDB0034580	Nodiff
M155T381.pos	1.82579e+07	1.82279e+07	0.998355	-0.00237532	0.917135	0.988675	2.16353e+07	2.84951e+07	1.00422e+07	2.66866e+07	1.00726e+07	1.26158e+07	2.25354e+07	9.6872e+06	2.19531e+07	2.10715e+07	1.03216e+07	2.37985e+07	0.157318	2,3-Butanediol	155.107	381.4	154.012	0.614339	C4H10O2S2	[M+H]+	Organooxygen compounds	Alcohols and polyols	C00265		513-85-9 / 3483-12-3	HMDB0003156	Nodiff
M155T49.pos	2.1566e+07	2.10627e+07	0.976665	-0.0340647	0.773573	0.965633	1.67045e+07	2.38654e+07	2.37038e+07	2.13665e+07	1.52148e+07	2.85408e+07	2.33885e+07	1.34088e+07	2.92986e+07	1.93619e+07	2.80792e+07	1.28393e+07	0.254653	Imidazol-5-yl-pyruvate	155.043	49.2	154.038	0.0486571	C6H6N2O3	[M+H]+			C03277	Amino acid metabolism			Nodiff
M156T45.pos	2.38856e+08	1.59895e+08	0.66942	-0.579016	0.147039	0.617915	4.75356e+08	2.47833e+08	1.98047e+08	1.22545e+08	2.06766e+08	1.82587e+08	3.09386e+08	1.31386e+08	1.24025e+08	1.55929e+08	1.45203e+08	9.34387e+07	1.31026	L-Histidine	156.077	45	155.07	0.489336	C6H9N3O2	[M+H]+	Carboxylic acids and derivatives	Amino acids, peptides, and analogues	C00135	Cancer: overview; Membrane transport; Metabolism of other amino acids; Digestive system; Translation; Amino acid metabolism	71-00-1	HMDB0000177	Nodiff
M157T360.pos	884425	467567	0.528667	-0.919568	0.665122	0.938311	3.40576e+06	234017	552540	637905	253271	223058	994474	188884	234859	370584	521878	494721	0.390327	3-Indoleacetonitrile	157.123	359.6	156.069	0.0155382	C10H8N2	[M+H]+	Indoles and derivatives	Indoles	C02938	Amino acid metabolism	771-51-7	HMDB0006524	Nodiff
M157T80.pos	3.87272e+07	9.29658e+07	2.40053	1.26335	0.0117437	0.318455	2.59165e+07	1.38156e+07	3.33689e+07	2.17772e+07	4.35628e+07	9.39222e+07	7.06726e+07	7.35133e+07	7.98179e+07	1.63138e+08	1.12908e+08	5.77453e+07	1.96816	Uracil 5-carboxylate	156.966	79.7	156.017	1.29578	C5H4N2O4	[M+H]+			C03030		23945-44-0		Up
M158T428.pos	2.73948e+07	2.16724e+07	0.791114	-0.338042	0.925111	0.990175	8.40516e+07	2.20886e+07	2.95666e+07	6.09022e+06	1.82571e+07	4.31472e+06	1.28695e+07	1.59827e+07	9.78988e+06	1.82011e+07	1.72328e+07	5.59587e+07	0.0492622	4,5-Dihydroorotic acid	158.154	428.3	158.033	1.69266	C5H6N2O4	[M]+	Carboxylic acids and derivatives	Amino acids, peptides, and analogues	C00337	Nucleotide metabolism	155-54-4 / 5988-19-2	HMDB0000528	Nodiff
M158T61.pos	3.42722e+07	5.15957e+07	1.50547	0.59021	0.234209	0.707926	2.7975e+07	1.3674e+07	2.59013e+07	1.79624e+07	5.25385e+07	6.75821e+07	5.47597e+07	6.66365e+07	4.44003e+07	2.30722e+07	2.35538e+07	9.71516e+07	1.01546	Pelargonic acid	158.154	60.7	158.131	2.65665	C9H18O2	[M]+	Fatty Acyls	Fatty acids and conjugates	C01601		112-05-0	HMDB0000847	Nodiff
M159T62.pos	3.88725e+06	3.96459e+06	1.0199	0.0284217	0.790836	0.969637	5.57005e+06	3.77676e+06	4.12552e+06	4.38862e+06	3.05604e+06	2.40649e+06	4.98457e+06	4.04472e+06	4.69396e+06	3.00285e+06	3.49247e+06	3.56894e+06	0.207456	2-Hydroxy-3-oxoadipate	159.028	61.6	176.032	20.3361	C6H8O6	[M+H-H2O]+			C03217	Carbohydrate metabolism			Nodiff
M160T170.pos	4.39905e+07	2.34547e+07	0.533175	-0.907318	0.802098	0.970085	1.8962e+08	1.05472e+07	1.49434e+07	2.55023e+07	1.51077e+07	8.22256e+06	2.54758e+07	5.95463e+06	1.16721e+07	1.67736e+07	2.32198e+07	5.7632e+07	0.184388	Pimelic acid	159.971	169.7	160.074	11.6804	C7H12O4	[M]+	Fatty Acyls	Fatty acids and conjugates	C02656	Metabolism of cofactors and vitamins	111-16-0	HMDB0000857	Nodiff
M160T272.pos	1.56745e+06	1.39692e+06	0.891208	-0.166165	0.585093	0.909437	2.19345e+06	1.91163e+06	1.18275e+06	1.78326e+06	1.49826e+06	835349	1.50361e+06	1.21776e+06	1.83855e+06	882893	953472	1.98526e+06	0.450783	D-Alanyl-D-alanine	160.097	271.6	160.085	0.24262	C6H12N2O3	[M]+	Carboxylic acids and derivatives	Amino acids, peptides, and analogues	C00993		923-16-0	HMDB0003459	Nodiff
M161T527.neg	4.26178e+07	1.82338e+07	0.427845	-1.22484	0.0753345	0.650955	1.77584e+07	4.82655e+07	2.82447e+07	1.37034e+07	8.76108e+07	6.01238e+07	1.78459e+07	2.1883e+07	4.96865e+06	3.24482e+07	1.99767e+07	1.22804e+07	1.55805	Nicotine	160.936	527.2	162.116	9.39376	C10H14N2	[M-H]-	Pyridines and derivatives	Pyrrolidinylpyridines	C00745	Environmental adaptation; Xenobiotics biodegradation and metabolism; Substance dependence	1954-11-05	HMDB0001934	Nodiff
M162T316.pos	1.09172e+06	1.35653e+06	1.24257	0.313323	0.449218	0.848303	449632	2.45118e+06	979549	1.22399e+06	356758	1.0892e+06	1.23846e+06	1.69548e+06	1.79324e+06	1.16985e+06	374972	1.86718e+06	0.671853	Indole-3-carboxylic acid	162.055	316.1	161.048	0.0110536	C9H7NO2	[M+H]+	Indoles and derivatives	Indolecarboxylic acids and derivatives	C19837		771-50-6	HMDB0003320	Nodiff
M162T364.pos	2.09254e+06	1.18508e+06	0.566334	-0.820275	0.817083	0.973536	1.05148e+07	43868	20996	1.79549e+06	144630	35511	3.33269e+06	1.11996e+06	20288.2	25941.2	130451	2.48113e+06	0.218026	Phenacetin	162.092	363.8	179.095	27.3549	C10H13NO2	[M+H-H2O]+			C07591		62-44-2		Nodiff
M163T175.neg	294505	329376	1.11841	0.161444	0.217676	0.741527	239298	262332	293321	312047	359698	300335	281686	308042	331125	431107	327181	297116	1.23082	Phenylpyruvic acid	163.04	174.8	164.047	1.07949	C9H8O3	[M-H]-	Benzene and substituted derivatives	Phenylpyruvic acid derivatives	C00166	Amino acid metabolism	156-06-9	HMDB0000205	Nodiff
M163T185.neg	396418	451825	1.13977	0.188742	0.294906	0.7752	373321	398460	342721	424083	491094	348826	570347	384993	398269	596106	409051	352180	1.04969	Enol-phenylpyruvate	163.04	184.5	164.047	1.07949	C9H8O3	[M-H]-	Benzene and substituted derivatives	Carbonyl compounds	C02763	Amino acid metabolism	5801-57-0	HMDB0012225	Nodiff
M163T298.pos	1.37096e+06	3.80347e+06	2.77432	1.47213	0.101304	0.54984	2.35576e+06	825428	732460	623448	737957	2.95068e+06	918834	4.87599e+06	720631	3.70942e+06	8.66437e+06	3.93158e+06	1.38693	Anabasine	163.039	297.6	162.116	0.0428267	C10H14N2	[M+H]+			C06180		13078-04-1 / 494-52-0	HMDB0004350	Nodiff
M163T414.pos	7.79856e+07	6.42511e+07	0.823884	-0.279486	0.0685963	0.482789	5.95666e+07	7.66893e+07	7.37349e+07	9.33865e+07	9.72407e+07	6.72958e+07	5.65476e+07	5.85033e+07	6.67263e+07	6.54511e+07	6.83794e+07	6.9899e+07	1.47488	2-Deoxystreptamine	163.112	414.1	162.1	0.0037162	C6H14N2O3	[M+H]+			C02627	Biosynthesis of other secondary metabolites	2037-48-1		Nodiff
M163T55.neg	7.3762e+06	4.16825e+06	0.565094	-0.823436	0.432518	0.830202	2.22172e+07	3.10055e+06	6.68321e+06	6.70505e+06	2.65086e+06	2.90034e+06	7.2601e+06	3.81283e+06	3.42059e+06	4.01935e+06	3.4729e+06	3.02375e+06	0.681572	Mannitol	163.061	55.1	182.079	4.8448	C6H14O6	[M-H2O-H]-	Organooxygen compounds	Carbohydrates and carbohydrate conjugates	C00392	Carbohydrate metabolism; Membrane transport	69-65-8	HMDB0000765	Nodiff
M163T62.neg	2.59791e+06	4.17145e+06	1.6057	0.683199	0.194491	0.728438	7.24798e+06	1.01265e+06	2.18186e+06	1.92503e+06	2.22854e+06	991397	7.64646e+06	1.45511e+06	2.60525e+06	2.16212e+06	6.34374e+06	4.81604e+06	1.22802	4-Hydroxycinnamic acid	163.04	62.4	164.047	1.07949	C9H8O3	[M-H]-	Cinnamic acids and derivatives	Hydroxycinnamic acids and derivatives	C00811	Amino acid metabolism; Metabolism of cofactors and vitamins	7400-08-0 / 7400-08-0 501-98-4 / 501-98-4	HMDB0002035	Nodiff
M164T34.pos	6.66502e+06	7.57866e+06	1.13708	0.185333	0.133357	0.60388	4.66395e+06	6.61937e+06	7.41752e+06	7.02926e+06	6.72925e+06	7.53077e+06	7.43633e+06	8.11556e+06	8.76067e+06	7.24602e+06	6.9558e+06	6.95756e+06	1.28346	Acetylcysteine	163.94	33.8	163.03	2.76561	C5H9NO3S	[M+H]+	Carboxylic acids and derivatives	Amino acids, peptides, and analogues	C06809		616-91-1	HMDB0001890	Nodiff
M164T91.neg	4.86905e+08	1.83735e+08	0.377352	-1.40602	0.438961	0.833446	2.08562e+09	1.49166e+08	2.31089e+08	2.27834e+08	1.59125e+08	6.85958e+07	3.2082e+08	3.03274e+07	1.17006e+08	1.79792e+08	2.11284e+08	2.43179e+08	0.628645	D-Phenylalanine	164.072	90.8	165.079	2.90116	C9H11NO2	[M-H]-			C02265	Amino acid metabolism; Sensory system	673-06-3		Nodiff
M165T330.pos	1.88587e+06	2.07197e+06	1.09868	0.135769	0.756704	0.95984	2.20921e+06	1.6024e+06	1.5903e+06	2.61934e+06	1.10445e+06	2.18955e+06	3.11375e+06	1.13205e+06	2.54148e+06	1.47651e+06	1.51605e+06	2.65198e+06	0.335285	Eugenol	165.091	330.2	164.084	0.0123312	C10H12O2	[M+H]+	Phenols	Methoxyphenols	C10453		97-53-0	HMDB0005809	Nodiff
M165T378.neg	6.65325e+06	6.4542e+06	0.970083	-0.0438196	0.389566	0.816638	6.34071e+06	7.64213e+06	6.36353e+06	6.55436e+06	6.50665e+06	6.5121e+06	6.62072e+06	6.29568e+06	6.28379e+06	6.60713e+06	6.65571e+06	6.26218e+06	0.859459	4-Hydroxyphenylglyoxylate	165.02	378.4	166.027	6.52045	C8H6O4	[M-H]-	Benzene and substituted derivatives	1-hydroxy-2-unsubstituted benzenoids	C03590		15573-67-8		Nodiff
M165T547_2.neg	4.18845e+08	5.37045e+08	1.2822	0.358627	0.738165	0.928001	1.56148e+08	2.86328e+08	2.35834e+08	1.30285e+09	2.79193e+08	2.52716e+08	1.50712e+08	1.89814e+08	1.88643e+08	1.59492e+09	5.60096e+08	5.38088e+08	0.470654	Desaminotyrosine	165.041	547.1	166.063	6.61323	C9H10O3	[M-H]-	Phenylpropanoic acids		C01744		501-97-3	HMDB0002199	Nodiff
M165T592.neg	3.61141e+07	5.17447e+07	1.43281	0.51885	0.266488	0.757326	6.94234e+07	2.65913e+07	2.00739e+07	6.0351e+07	2.08025e+07	1.94424e+07	2.51402e+07	9.05998e+07	6.06589e+07	2.11532e+07	5.59422e+07	5.69742e+07	1.02351	Phthalic acid	165.041	592.1	166.027	7.77482	C8H6O4	[M-H]-	Benzene and substituted derivatives	Benzoic acids and derivatives	C01606	Membrane transport	88-99-3 / 3198-29-6	HMDB0002107	Nodiff
M165T90.neg	4.93124e+06	4.96427e+06	1.0067	0.00963325	0.317331	0.788605	1.80069e+07	2.64039e+06	1.91023e+06	3.2015e+06	2.69851e+06	1.12992e+06	6.56601e+06	6.67208e+06	3.33115e+06	3.67889e+06	4.89656e+06	4.64094e+06	0.966843	Phenyllactate	165.056	90.3	166.063	2.27801	C9H10O3	[M-H]-	Phenylpropanoic acids		C05607	Amino acid metabolism	7326-19-4	HMDB0000563	Nodiff
M166T374.neg	8.95833e+06	1.03383e+07	1.15404	0.206694	0.377175	0.814116	3.05448e+07	4.5687e+06	4.60998e+06	4.46688e+06	5.14974e+06	4.40983e+06	1.30549e+07	2.16196e+07	7.04442e+06	6.96913e+06	4.63005e+06	8.71154e+06	0.756291	6-Methylmercaptopurine	166.016	373.9	166.031	26.5505	C6H6N4S	[M]-	Imidazopyrimidines	Purines and purine derivatives	C16614	Xenobiotics biodegradation and metabolism	50-66-8	HMDB0060412	Nodiff
M166T407.neg	5.373e+06	3.17723e+06	0.591332	-0.75796	0.038918	0.643426	6.56e+06	4.83574e+06	6.25277e+06	4.28607e+06	4.44575e+06	5.85768e+06	1.63153e+06	5.1434e+06	1.78469e+06	4.14901e+06	4.76014e+06	1.59459e+06	1.80007	3-Methylxanthine	166.052	407.1	166.049	14.4533	C6H6N4O2	[M]-	Imidazopyrimidines	Purines and purine derivatives	C16357	Biosynthesis of other secondary metabolites	1076-22-8	HMDB0001886	Down
M166T51.pos	4.67177e+08	4.59353e+08	0.983253	-0.0243656	0.850298	0.979268	3.76502e+08	5.31377e+08	3.83511e+08	4.56065e+08	5.56365e+08	4.99244e+08	4.64912e+08	5.5748e+08	3.75758e+08	3.47388e+08	4.97276e+08	5.13306e+08	0.176076	L-Methionine S-oxide	166.053	50.8	165.046	0.144532	C5H11NO3S	[M+H]+	Endogenous Metabolites		C02989	Amino acid metabolism	3226-65-1		Nodiff
M166T58.pos	1.18765e+07	1.17592e+07	0.990121	-0.0143237	0.874334	0.982642	3.22446e+07	7.79101e+06	1.00108e+07	9.1025e+06	9.0855e+06	3.0245e+06	1.56089e+07	3.11159e+06	5.5642e+06	1.28433e+07	1.43016e+07	1.91253e+07	0.148781	7-Methylguanine	166.072	57.7	165.065	0.00504575	C6H7N5O	[M+H]+	Imidazopyrimidines	Purines and purine derivatives	C02242		578-76-7	HMDB0000897	Nodiff
M166T99.pos	4.11578e+09	3.89927e+09	0.947394	-0.0779634	0.701052	0.946971	5.5878e+09	3.50537e+09	5.01666e+09	4.67833e+09	3.54814e+09	2.35841e+09	5.94715e+09	1.63691e+09	3.5855e+09	3.89783e+09	3.32614e+09	5.0021e+09	0.329922	L-Phenylalanine	166.086	99	165.079	0.0267317	C9H11NO2	[M+H]+			C00079	Cancer: overview; Membrane transport; Digestive system; Translation; Amino acid metabolism	673-06-3		Nodiff
M167T302.pos	1.29791e+06	1.35008e+06	1.04019	0.0568475	0.679539	0.942335	1.49702e+06	548713	1.3156e+06	983689	1.15585e+06	2.28661e+06	1.44328e+06	778659	1.3605e+06	1.36914e+06	1.29067e+06	1.85822e+06	0.408596	3,4-Dihydroxymandelic acid	167.03	302	184.037	4.39441	C8H8O5	[M+H-H2O]+	Phenols	Benzenediols	C05580	Amino acid metabolism	775-01-9	HMDB0001866	Nodiff
M167T408.pos	7.80684e+06	8.23679e+06	1.05507	0.0773426	0.526397	0.886839	7.2742e+06	6.94467e+06	8.13339e+06	6.32542e+06	7.08866e+06	1.10747e+07	8.11438e+06	9.41976e+06	7.11823e+06	6.90668e+06	9.28831e+06	8.57336e+06	0.526744	Cyromazine	167.107	408	166.097	16.8994	C6H10N6	[M+H]+	Triazines	Aminotriazines	C14147		66215-27-8	HMDB0029862	Nodiff
M167T48.neg	4.47788e+08	5.31093e+08	1.18604	0.246148	0.253299	0.752767	2.73822e+08	5.79112e+08	5.91704e+08	3.08919e+08	4.57878e+08	4.75292e+08	4.0832e+08	6.68169e+08	5.32999e+08	4.49314e+08	6.70947e+08	4.56808e+08	0.947533	Uric acid	167.021	47.7	168.028	0.143695	C5H4N4O3	[M-H]-	Imidazopyrimidines	Purines and purine derivatives	C00366	Digestive system; Nucleotide metabolism	69-93-2	HMDB0000289	Nodiff
M168T99.pos	1.55265e+07	1.52138e+07	0.979861	-0.0293509	0.91528	0.988188	2.64358e+07	1.33764e+07	1.51992e+07	1.24758e+07	1.17953e+07	1.38766e+07	1.88726e+07	9.61195e+06	1.02424e+07	1.71245e+07	1.51641e+07	2.02674e+07	0.0989457	D-synephrine	168.091	99	167.095	2.86475	C9H13NO2	[M+H]+	Benzene and substituted derivatives	Phenols	C01869		614-35-7	HMDB0062811	Nodiff
M169T277_1.neg	5.3675e+06	5.61021e+06	1.04522	0.0638048	0.520818	0.853924	4.70209e+06	5.76292e+06	5.27453e+06	5.56766e+06	5.06165e+06	5.83614e+06	4.59638e+06	5.90335e+06	5.23702e+06	5.3171e+06	6.30985e+06	6.29756e+06	0.562808	Gallic acid	169.016	276.6	170.022	8.73292	C7H6O5	[M-H]-	Benzene and substituted derivatives	Benzoic acids and derivatives	C01424		149-91-7	HMDB0005807	Nodiff
M169T42.pos	8.01106e+06	6.2364e+06	0.778474	-0.36128	0.752115	0.95893	6.38442e+06	2.14806e+07	8.50234e+06	1.91867e+06	4.86267e+06	4.91764e+06	8.16394e+06	5.56873e+06	2.60857e+06	1.08598e+07	7.86342e+06	2.35387e+06	0.39208	(S)-4-Hydroxymandelate	169.046	41.9	168.042	0.691062	C8H8O4	[M+H]+			C03198				Nodiff
M170T45.pos	4.22702e+07	4.54467e+07	1.07515	0.104535	0.367646	0.801223	5.6646e+07	3.6164e+07	4.03426e+07	4.09465e+07	4.51729e+07	3.43492e+07	4.16523e+07	4.9748e+07	4.14204e+07	5.14988e+07	4.82458e+07	4.0115e+07	0.772185	1-Methylhistidine	170.094	44.5	169.085	9.99447	C7H11N3O2	[M+H]+	Carboxylic acids and derivatives	Amino acids, peptides, and analogues	C01152	Amino acid metabolism	332-80-9/368-16-1	HMDB0000001	Nodiff
M170T49.pos	1.41947e+07	1.42046e+07	1.00069	0.00100232	0.963635	0.992765	1.35868e+07	1.47076e+07	1.3809e+07	1.45786e+07	1.41432e+07	1.43428e+07	1.42381e+07	1.33412e+07	1.33688e+07	1.3703e+07	1.40501e+07	1.6526e+07	0.0264994	Pyridoxine	169.986	49.4	169.074	3.9949	C8H11NO3	[M+H]+	Pyridines and derivatives	Pyridoxines	C00314	Metabolism of cofactors and vitamins	65-23-6	HMDB0000239	Nodiff
M170T561.pos	3.28643e+07	3.44736e+07	1.04897	0.0689678	0.50937	0.880523	2.48742e+07	3.56297e+07	3.23288e+07	3.73222e+07	3.39277e+07	3.31034e+07	2.93573e+07	3.8725e+07	3.3662e+07	3.49301e+07	3.141e+07	3.8757e+07	0.633416	8-Amino-7-oxononanoate	170.117	561.5	187.121	23.1252	C9H17NO3	[M+H-H2O]+			C01092	Metabolism of cofactors and vitamins	4707-58-8		Nodiff
M170T670.pos	3.17385e+07	3.24584e+07	1.02268	0.0323573	0.803129	0.970085	2.84428e+07	3.06998e+07	3.3933e+07	3.13619e+07	2.96858e+07	3.63078e+07	4.13033e+07	3.36737e+07	2.99095e+07	3.00871e+07	3.21214e+07	2.76554e+07	0.134203	Diphenylamine	170.097	669.5	169.089	0.00200855	C12H11N	[M+H]+	Benzene and substituted derivatives	Anilines	C11016		122-39-4	HMDB0032562	Nodiff
M170T73.pos	4.26223e+07	2.49321e+07	0.584954	-0.773604	0.608693	0.920187	1.14378e+08	3.13229e+07	3.09643e+07	4.7372e+07	3.09425e+07	753628	4.86213e+07	273321	2.55383e+07	1.50233e+07	2.18729e+07	3.82634e+07	0.426995	Norepinephrine	169.977	73.2	169.074	0.14004	C8H11NO3	[M+H]+	Phenols	Benzenediols	C00547	Circulatory system; Nervous system; Signal transduction; Sensory system; Endocrine system; Digestive system; Environmental adaptation; Signaling molecules and interaction; Amino acid metabolism; Cellular community - eukaryotes	51-41-2	HMDB0000216	Nodiff
M171T242.pos	1.25343e+06	1.31305e+06	1.04757	0.067044	0.5672	0.901788	1.87643e+06	1.05698e+06	1.19703e+06	1.25538e+06	1.14894e+06	985808	1.38501e+06	1.39404e+06	1.15731e+06	1.49802e+06	1.36413e+06	1.0798e+06	0.476126	N-Butyryl-L-homoserine lactone	171.092	242	171.089	14.0275	C8H13NO3	[M]+			C11837		67605-85-0		Nodiff
M172T291.pos	8.49079e+07	8.24835e+07	0.971446	-0.0417938	0.870673	0.982356	6.72322e+07	9.37153e+07	6.26987e+07	8.00387e+07	9.80507e+07	1.07712e+08	8.81359e+07	1.03205e+08	7.17998e+07	8.00805e+07	7.68765e+07	7.48032e+07	0.16486	Gabapentin	172.133	290.8	171.126	0.083681	C9H17NO2	[M+H]+			C07018		60142-96-3		Nodiff
M172T33.pos	2.74239e+07	1.85007e+07	0.674621	-0.567851	0.968675	0.993885	8.51605e+06	4.69281e+07	3.24682e+07	3.10141e+07	4.50833e+07	533417	3.62666e+07	1.15991e+07	3.51787e+07	1.0885e+07	7.83987e+06	9.23493e+06	0.0024482	3-Dehydroshikimate	171.992	33.2	172.037	8.30932	C7H8O5	[M]+			C02637	Amino acid metabolism	2922-42-1		Nodiff
M172T42.neg	1.27394e+07	6.03107e+06	0.47342	-1.07881	0.0936495	0.668202	2.92394e+07	9.45315e+06	1.11704e+07	1.16786e+07	8.64483e+06	6.24985e+06	6.84171e+06	619002	4.75374e+06	4.24484e+06	9.59915e+06	1.0128e+07	1.41724	4-Quinolinecarboxylic acid	171.912	42.4	173.048	14.2767	C10H7NO2	[M-H]-			C06414		486-74-8		Nodiff
M173T176.neg	5.11475e+07	2.13022e+07	0.416486	-1.26366	0.170683	0.716551	6.14079e+07	5.19488e+07	1.23431e+07	4.55648e+07	1.26036e+08	9.58513e+06	1.96589e+07	1.18011e+07	1.29439e+07	5.66352e+07	1.24635e+07	1.43106e+07	1.12867	Shikimic acid	172.992	176.1	174.053	29.2887	C7H10O5	[M-H]-	Organooxygen compounds	Alcohols and polyols	C00493	Amino acid metabolism	138-59-0	HMDB0003070	Nodiff
M173T390.pos	2.33212e+06	3.42033e+06	1.46662	0.552491	0.205285	0.680731	644502	2.52991e+06	2.26716e+06	3.80376e+06	2.3974e+06	2.35001e+06	2.16458e+06	5.76112e+06	2.49243e+06	2.25918e+06	5.24198e+06	2.60269e+06	1.10116	Quinaldic acid	173.165	390.4	173.048	0.535269	C10H7NO2	[M]+	Quinolines and derivatives	Quinoline carboxylic acids	C06325		1993-10-07	HMDB0000842	Nodiff
M173T41.neg	6.08207e+06	6.69375e+06	1.10057	0.138252	0.530097	0.859521	3.58888e+06	8.5839e+06	1.23989e+07	1.75518e+06	5.11892e+06	5.04661e+06	5.32273e+06	8.94833e+06	7.828e+06	9.60199e+06	3.40943e+06	5.05199e+06	0.462573	Isocitrate	173.009	41.2	192.027	4.56623	C6H8O7	[M-H2O-H]-	Carboxylic acids and derivatives	Tricarboxylic acids and derivatives	C00311	Carbohydrate metabolism; Cancer: overview; Endocrine system	320-77-4	HMDB0000193	Nodiff
M173T52.pos	1.34412e+07	1.05127e+07	0.782125	-0.354529	0.56284	0.900344	1.89154e+07	1.57903e+07	2.00614e+07	1.23429e+07	9.09322e+06	4.44407e+06	1.37079e+07	1.15499e+07	1.00584e+07	8.21098e+06	1.15358e+07	8.0132e+06	0.592151	Iminoarginine	173.092	51.7	172.096	0.322414	C6H12N4O2	[M+H]+			C21026				Nodiff
M174T281.pos	3.55624e+06	3.42371e+06	0.962734	-0.0547913	0.575422	0.905521	9.76633e+06	2.55357e+06	2.37027e+06	2.63447e+06	3.45386e+06	558938	2.56361e+06	2.20193e+06	2.56495e+06	4.23825e+06	4.73717e+06	4.23637e+06	0.510755	N-Acetylleucine	174.113	280.9	173.105	0.574341	C8H15NO3	[M+H]+	Carboxylic acids and derivatives	Amino acids, peptides, and analogues	C02710		1188-21-2	HMDB0011756	Nodiff
M174T301.neg	3.03177e+07	1.48381e+07	0.489419	-1.03086	0.0781909	0.65105	3.67609e+07	3.5645e+07	4.15634e+07	2.13486e+07	3.94448e+07	7.14375e+06	3.67848e+07	4.49321e+06	1.53184e+07	9.12809e+06	9.85628e+06	1.34477e+07	1.49045	1H-Indole-3-acetamide	174.056	300.6	174.079	7.29646	C10H10N2O	[M]-	Indoles and derivatives	Indoles	C02693	Amino acid metabolism	879-37-8	HMDB0029739	Nodiff
M174T45.neg	1.59024e+06	3.38532e+06	2.12882	1.09005	0.186274	0.724699	828301	3.01219e+06	2.43768e+06	302267	2.48536e+06	475614	1.81448e+06	7.36359e+06	4.77569e+06	3.58351e+06	477019	2.29763e+06	1.0763	N-Acetyl-L-aspartic acid	174.041	45.2	175.048	2.16041	C6H9NO5	[M-H]-	Carboxylic acids and derivatives	Amino acids, peptides, and analogues	C01042	Amino acid metabolism	997-55-7	HMDB0000812	Nodiff
M174T50.neg	3.81252e+07	1.0372e+07	0.272049	-1.87806	0.613218	0.884999	1.88315e+08	5.84732e+06	1.93898e+07	3.07077e+06	8.02339e+06	4.10502e+06	2.20417e+07	3.08476e+06	6.21891e+06	1.47615e+07	2.71096e+06	1.3414e+07	0.471686	Citrulline	174.089	49.8	175.096	0.43656	C6H13N3O3	[M-H]-	Carboxylic acids and derivatives	Amino acids, peptides, and analogues	C00327	Amino acid metabolism	372-75-8	HMDB0000904	Nodiff
M174T55_2.pos	1.23527e+06	1.06116e+06	0.859052	-0.219182	0.497131	0.874482	722431	1.03238e+06	1.82334e+06	1.13232e+06	1.68882e+06	1.01234e+06	1.08222e+06	907992	1.19516e+06	1.0724e+06	1.20696e+06	902265	0.646204	2-Oxoarginine	174.088	55.4	173.08	1.28671	C6H11N3O3	[M+H]+	Carboxylic acids and derivatives	Alpha-keto acids and derivatives	C03771	Amino acid metabolism	3715-10-04	HMDB0004225	Nodiff
M174T77.neg	8.21829e+06	6.18994e+06	0.753191	-0.408912	0.623649	0.889406	2.19945e+07	3.98626e+06	5.51072e+06	8.74652e+06	1.58241e+06	7.48933e+06	2.67099e+06	7.69449e+06	8.73532e+06	8.57371e+06	8.77816e+06	686993	0.389132	Dehydroascorbate	173.962	77	174.016	11.2081	C6H6O6	[M]-			C05422	Carbohydrate metabolism; Metabolism of other amino acids	490-83-5		Nodiff
M175T281.pos	667211	771916	1.15693	0.210301	0.611218	0.920443	29862.2	1.01822e+06	175628	181876	1.35742e+06	1.24026e+06	213375	1.2882e+06	183594	1.10894e+06	1.64398e+06	193397	0.432098	Demethylated antipyrine	175.087	280.6	174.079	0.508045	C10H10N2O	[M+H]+	Azoles	Pyrazoles	C13008		89-25-8	HMDB0006240	Nodiff
M175T325.neg	4.3213e+06	2.5326e+06	0.586073	-0.770847	0.119761	0.695622	9.0379e+06	3.6126e+06	5.15561e+06	3.5458e+06	2.6881e+06	1.88779e+06	2.96945e+06	1.67045e+06	2.41875e+06	2.89739e+06	2.88069e+06	2.35886e+06	1.3428	Guanidinosuccinic acid	174.953	324.8	175.059	8.50632	C5H9N3O4	[M]-	Carboxylic acids and derivatives	Amino acids, peptides, and analogues	C03139		6133-30-8	HMDB0003157	Nodiff
M175T47.pos	2.40049e+07	5.57312e+07	2.32166	1.21516	0.0498221	0.436872	1.36857e+07	2.57709e+07	2.36983e+07	2.50612e+07	2.34956e+07	3.23178e+07	1.00841e+08	2.40802e+07	2.60372e+07	7.27557e+07	8.30991e+07	2.75743e+07	1.62283	L-Arginine	174.938	47	174.112	0.233621	C6H14N4O2	[M+H]+	Carboxylic acids and derivatives	Amino acids, peptides, and analogues	C00062	Cancer: overview; Membrane transport; Signal transduction; Digestive system; Neurodegenerative disease; Translation; Amino acid metabolism; Infectious disease: parasitic	74-79-3	HMDB0000517	Up
M175T51.pos	1.27702e+07	1.63451e+07	1.27994	0.35608	0.0393192	0.402669	1.41176e+07	1.13087e+07	1.27094e+07	9.87905e+06	1.58557e+07	1.27509e+07	1.49761e+07	2.242e+07	1.42812e+07	1.8044e+07	1.38084e+07	1.45412e+07	1.58171	N-Acetylornithine	175.108	51.4	174.1	0.0291394	C7H14N2O3	[M+H]+	Carboxylic acids and derivatives	Amino acids, peptides, and analogues	C00437	Amino acid metabolism	6205-08-9 / 2185-16-2	HMDB0003357	Up
M176T334.pos	2.33939e+06	1.13844e+06	0.486639	-1.03908	0.98355	0.996264	1.17792e+07	268804	874660	77132.6	706950	329589	151882	182521	332246	2.15074e+06	3.33914e+06	674082	0.0262416	2-Isopropylmalic acid	176.071	334.2	176.069	0.0776216	C7H12O5	[M]+	Fatty Acyls	Fatty acids and conjugates	C02504	Carbohydrate metabolism; Amino acid metabolism	3237-44-3	HMDB0000402	Nodiff
M177T171.pos	1.53106e+07	1.75486e+07	1.14618	0.19683	0.366628	0.800541	1.58049e+07	1.15202e+07	2.20976e+07	1.47016e+07	9.72351e+06	1.80157e+07	2.50264e+07	1.7845e+07	1.42637e+07	1.39688e+07	1.4019e+07	2.01689e+07	0.739752	N-Formyl-L-methionine	176.97	170.5	177.046	10.1334	C6H11NO3S	[M]+	Carboxylic acids and derivatives	Amino acids, peptides, and analogues	C03145	Amino acid metabolism	4289-98-9	HMDB0001015	Nodiff
M177T44.neg	1.79128e+06	2.20014e+06	1.22825	0.296604	0.599115	0.881254	907329	2.01065e+06	992019	3.12782e+06	892114	2.81772e+06	2.32138e+06	804359	2.83971e+06	4.51723e+06	1.30451e+06	1.41362e+06	0.52457	Pyrophosphate	176.935	44.3	177.943	2.26071	H4P2O7	[M-H]-	Non-metal oxoanionic compounds	Non-metal pyrophosphates	C00013	Energy metabolism; Neurodegenerative disease	14000-31-8/2466-09-3	HMDB0000250	Nodiff
M178T67.neg	1.68711e+08	5.07819e+07	0.300999	-1.73217	0.0506397	0.643426	4.74084e+08	1.15435e+08	1.13666e+08	1.2383e+08	1.02627e+08	8.26242e+07	1.20199e+07	2.10457e+06	1.99752e+06	1.04496e+08	8.663e+07	9.74427e+07	1.66701	Hippuric acid	178.05	67.3	179.058	0.700318	C9H9NO3	[M-H]-	Benzene and substituted derivatives	Benzoic acids and derivatives	C01586	Amino acid metabolism	495-69-2	HMDB0000714	Nodiff
M179T51.neg	1.18981e+08	8.09796e+07	0.680608	-0.555103	0.631828	0.892648	3.44786e+08	6.2558e+07	8.48443e+07	8.19388e+07	1.02001e+08	3.77583e+07	1.22434e+08	4.61256e+07	7.2892e+07	8.34997e+07	6.42762e+07	9.66495e+07	0.377527	D-Fructose	179.056	51.2	180.063	0.134036	C6H12O6	[M-H]-			C00095	Endocrine and metabolic disease; Membrane transport; Sensory system; Digestive system; Carbohydrate metabolism	57-48-7		Nodiff
M180T62.neg	2.64228e+08	3.23348e+08	1.22375	0.291303	0.966915	0.992771	3.23848e+08	4.71243e+07	7.25243e+07	7.70724e+07	1.04277e+09	2.20313e+07	1.43383e+09	1.82703e+07	2.25081e+07	1.87571e+08	2.10686e+08	6.72203e+07	0.0585021	L-Tyrosine	180.066	62.4	181.074	1.24399	C9H11NO3	[M-H]-	Carboxylic acids and derivatives	Amino acids, peptides, and analogues	C00082	Cancer: overview; Metabolism of cofactors and vitamins; Nervous system; Digestive system; Endocrine system; Neurodegenerative disease; Translation; Amino acid metabolism; Substance dependence	60-18-4	HMDB0000158	Nodiff
M180T689.neg	1.15093e+07	1.58027e+07	1.37304	0.457378	0.173503	0.717475	1.53415e+07	1.69968e+07	8.30318e+06	5.17227e+06	5.44117e+06	1.78006e+07	1.3446e+07	1.50608e+07	1.92052e+07	9.87157e+06	1.2773e+07	2.44598e+07	1.0524	Theobromine	179.989	688.6	180.065	7.81731	C7H8N4O2	[M]-	Imidazopyrimidines	Purines and purine derivatives	C07480	Biosynthesis of other secondary metabolites	83-67-0	HMDB0002825	Nodiff
M180T83.neg	5.96819e+06	1.12634e+07	1.88724	0.916277	0.0370725	0.633465	3.59037e+06	2.18316e+06	7.17789e+06	2.44748e+06	6.12651e+06	1.42837e+07	1.25644e+07	8.14639e+06	7.09373e+06	1.36687e+07	1.17856e+07	1.43216e+07	1.79914	Beta-Tyrosine	180.067	82.7	181.074	0.133284	C9H11NO3	[M-H]-	Benzene and substituted derivatives	1-hydroxy-2-unsubstituted benzenoids	C04368	Amino acid metabolism		HMDB0003831	Up
M181T64.pos	7.28165e+06	6.92407e+06	0.950893	-0.0726448	0.430714	0.840561	1.86662e+07	6.51433e+06	1.12919e+06	8.58847e+06	8.37015e+06	421609	6.31495e+06	5.32095e+06	4.57859e+06	7.99752e+06	7.10359e+06	1.02288e+07	0.743362	Dulcin	181.097	63.8	180.09	1.10438	C9H12N2O2	[M+H]+	Benzene and substituted derivatives	N-phenylureas	C19415		150-69-6	HMDB0032565	Nodiff
M183T184.pos	1.06434e+08	1.23483e+08	1.16019	0.21436	0.189576	0.66941	1.02193e+08	8.37365e+07	1.43441e+08	1.12791e+08	9.40107e+07	1.02431e+08	1.28319e+08	1.4416e+08	1.0625e+08	1.38618e+08	8.94607e+07	1.34093e+08	1.08063	2-Hydroxy-3-(4-hydroxyphenyl)propanoic acid	182.983	183.6	182.058	10.8166	C9H10O4	[M+H]+			C03672		6482-98-0	HMDB0000755	Nodiff
M183T252.neg	6.69472e+06	7.28331e+06	1.08792	0.12157	0.783912	0.939777	6.08579e+06	7.55846e+06	8.38914e+06	6.48404e+06	5.12422e+06	6.52669e+06	6.63086e+06	6.75791e+06	1.30529e+07	6.09752e+06	6.37467e+06	4.78599e+06	0.217687	2,4-Dinitrophenol	183.005	252.3	184.012	3.14745	C6H4N2O5	[M-H]-	Textile Chemicals/Auxiliary/Dyes; Pesticides/Herbicides; Industrial Chemicals; Endogenous Metabolites		C02496		51-28-5		Nodiff
M183T290.pos	2.96114e+07	3.06442e+07	1.03488	0.0494592	0.63328	0.927389	1.46207e+07	3.15634e+07	3.74785e+07	3.00626e+07	3.29532e+07	3.09902e+07	3.35118e+07	3.01124e+07	3.04514e+07	3.21286e+07	3.1467e+07	2.61939e+07	0.395974	Sorbitol	182.982	289.8	182.079	16.7063	C6H14O6	[M+H]+	Organooxygen compounds	Carbohydrates and carbohydrate conjugates	C00794	Carbohydrate metabolism; Membrane transport	50-70-4	HMDB0000247	Nodiff
M183T329.pos	1.2863e+07	2.04402e+07	1.58907	0.668179	0.121867	0.583951	1.28984e+07	1.29716e+07	1.14257e+07	1.30088e+07	1.09543e+07	1.59194e+07	1.69155e+07	1.44476e+07	1.66769e+07	1.17836e+07	4.55979e+07	1.72199e+07	1.38898	Se-Methylselenocysteine	182.982	329.3	182.98	14.209	C4H9NO2Se	[M]+	Carboxylic acids and derivatives	Amino acids, peptides, and analogues	C05689	Metabolism of other amino acids	26046-90-2 / 2574-71-2 / NA	HMDB0004113	Nodiff
M183T687.pos	4.67962e+07	5.39001e+07	1.1518	0.203896	0.727694	0.953295	2.60329e+07	6.38796e+07	5.3216e+07	5.9055e+07	5.21141e+07	2.64797e+07	3.4415e+07	2.96819e+07	9.84971e+07	6.41527e+07	2.94488e+07	6.72052e+07	0.364922	Homovanillic acid	182.983	687	182.058	11.1629	C9H10O4	[M+H]+	Phenols	Methoxyphenols	C05582	Amino acid metabolism; Nervous system	306-08-1	HMDB0000118	Nodiff
M184T51.pos	6.0756e+07	5.57867e+07	0.918209	-0.123106	0.544678	0.893971	6.80262e+07	7.4977e+07	5.08931e+07	4.16637e+07	7.43832e+07	5.45926e+07	5.21728e+07	6.012e+07	5.77657e+07	5.1242e+07	5.59107e+07	5.75089e+07	0.598712	Phosphorylcholine	184.073	50.5	184.074	0.82723	C5H15NO4P	[M+H]+	Organonitrogen compounds	Quaternary ammonium salts	C00588	Lipid metabolism; Cancer: overview	3616-04-4 / 107-73-3	HMDB0001565	Nodiff
M187T333.pos	1.06832e+07	1.44163e+07	1.34943	0.432351	0.272871	0.736682	1.94671e+07	8.57521e+06	6.74784e+06	1.19523e+07	6.82747e+06	1.05295e+07	9.8859e+06	9.35509e+06	1.41114e+07	2.32239e+07	2.17924e+07	8.12908e+06	0.994463	Undecanoic acid	186.953	333.1	186.162	15.6043	C11H22O2	[M+H]+	Fatty Acyls	Fatty acids and conjugates	C17715		112-37-8	HMDB0000947	Nodiff
M187T52.neg	1.31052e+07	1.14739e+07	0.875521	-0.191787	0.242209	0.748377	1.06916e+07	1.71999e+07	1.36379e+07	1.18636e+07	1.21708e+07	1.30673e+07	1.20512e+07	1.0221e+07	1.35981e+07	7.89521e+06	1.03029e+07	1.47748e+07	1.19837	Azelaic acid	187.098	52.1	188.105	2.00964	C9H16O4	[M-H]-	Fatty Acyls	Fatty acids and conjugates	C08261		123-99-9	HMDB0000784	Nodiff
M187T60.pos	2.32681e+07	4.39979e+07	1.89091	0.919079	0.131395	0.600032	2.54879e+07	1.32772e+07	1.26651e+07	4.57453e+07	3.17654e+07	1.06678e+07	7.55895e+07	7.74e+07	3.33132e+07	2.88271e+07	1.23024e+07	3.65552e+07	1.25972	5-Guanidino-3-methyl-2-oxopentanoate	187.108	59.7	187.096	0.0228995	C7H13N3O3	[M]+			C20234				Nodiff
M188T168.pos	3.89226e+08	4.85698e+08	1.24786	0.319452	0.280386	0.742226	2.0707e+08	5.03883e+08	8.76613e+07	4.64575e+08	4.57886e+08	6.14279e+08	6.78654e+08	3.60461e+08	5.53515e+08	4.6832e+08	4.5794e+08	3.95297e+08	1.0173	3-Indoleacrylate	188.071	168	187.063	0.00395492	C11H9NO2	[M+H]+			C21283				Nodiff
M188T184.pos	7.51549e+08	9.5801e+08	1.27471	0.350174	0.173214	0.649435	8.02204e+08	8.18054e+08	6.48268e+08	8.64905e+08	6.05425e+08	7.70436e+08	1.5167e+09	6.75903e+08	7.6286e+08	8.16286e+08	1.17196e+09	8.04349e+08	1.17231	N-Alpha-acetyllysine	188.071	183.5	188.116	0.352819	C8H16N2O3	[M]+	Carboxylic acids and derivatives	Amino acids, peptides, and analogues	C12989		1946-82-3	HMDB0000446	Nodiff
M188T50.pos	2.18878e+07	2.73318e+07	1.24872	0.320454	0.151306	0.624159	1.76989e+07	2.65135e+07	2.10706e+07	2.02308e+07	2.53648e+07	2.04479e+07	2.24453e+07	4.31243e+07	2.55776e+07	2.3133e+07	2.91453e+07	2.05651e+07	1.17748	(Z)-But-1-ene-1,2,4-tricarboxylate	188.035	50.3	188.032	16.4863	C7H8O6	[M]+	Carboxylic acids and derivatives	Tricarboxylic acids and derivatives	C04002			HMDB0060320	Nodiff
M189T45.pos	2.32259e+08	1.77333e+08	0.763512	-0.389277	0.826889	0.975058	6.71914e+08	1.98843e+08	2.2118e+08	6.33508e+07	1.51888e+08	8.63788e+07	1.78536e+08	1.49626e+08	3.45803e+08	9.56103e+07	7.17098e+07	2.2271e+08	0.23902	N6,N6,N6-Trimethyl-L-lysine	189.16	45.2	188.153	1.18418	C9H20N2O2	[M+H]+	Carboxylic acids and derivatives	Amino acids, peptides, and analogues	C03793	Amino acid metabolism	c("19253-88-4", "55528-53-5")	HMDB0001325	Nodiff
M189T56_2.pos	9.5223e+07	4.61281e+07	0.484421	-1.04567	0.0851113	0.515836	2.05792e+08	6.72582e+07	4.60685e+07	4.76279e+07	5.38004e+07	1.50791e+08	2.39657e+07	9.03871e+07	5.93514e+07	2.28444e+07	1.91669e+07	6.10528e+07	1.40427	N6-Acetyl-L-lysine	189.123	56.3	188.116	0.000387763	C8H16N2O3	[M+H]+	Carboxylic acids and derivatives	Amino acids, peptides, and analogues	C02727	Amino acid metabolism	692-04-6	HMDB0000206	Nodiff
M189T88.pos	1.56993e+07	1.13561e+07	0.723351	-0.467232	0.514335	0.882195	3.95292e+07	1.02545e+07	1.28315e+07	1.60901e+07	9.39872e+06	6.09156e+06	1.71278e+07	3.96412e+06	1.01207e+07	1.03219e+07	1.1586e+07	1.50158e+07	0.550471	Glycylleucine	189.124	88	188.116	0.655656	C8H16N2O3	[M+H]+	Carboxylic acids and derivatives	Amino acids, peptides, and analogues	C02155		869-19-2	HMDB0000759	Nodiff
M190T61.pos	4.27262e+06	3.05151e+06	0.714201	-0.485597	0.331229	0.779676	9.06145e+06	3.14595e+06	6.2648e+06	3.22671e+06	2.01853e+06	1.91827e+06	7.69427e+06	496951	2.72823e+06	2.12161e+06	2.00685e+06	3.26115e+06	0.862188	Homocitrulline	190.108	61.3	189.111	0.0986939	C7H15N3O3	[M+H]+	Carboxylic acids and derivatives	Amino acids, peptides, and analogues	C02427		1190-49-4	HMDB0000679	Nodiff
M191T41.neg	1.48927e+08	9.64355e+07	0.647537	-0.626965	0.182776	0.723431	2.25008e+08	7.75313e+07	7.13809e+07	2.41884e+08	1.92723e+08	8.50322e+07	2.09416e+08	2.56699e+07	2.69717e+07	3.99764e+07	8.81952e+07	1.88384e+08	1.14086	Citric acid	191.02	40.6	192.027	0.125641	C6H8O7	[M-H]-	Carboxylic acids and derivatives	Tricarboxylic acids and derivatives	C00158	Cancer: overview; Sensory system; Endocrine system; Carbohydrate metabolism; Amino acid metabolism	77-92-9 / 126-44-3	HMDB0000094	Nodiff
M191T47.neg	1.68006e+08	7.63648e+07	0.454536	-1.13753	0.4937	0.848768	6.57495e+08	1.74522e+07	1.96766e+08	4.21418e+07	4.98476e+07	4.43333e+07	1.67808e+08	8.91477e+06	5.55229e+07	1.07347e+08	8.39792e+06	1.10198e+08	0.603908	Quinate	191.056	46.6	192.063	0.649024	C7H12O6	[M-H]-			C00296	Amino acid metabolism	77-95-2		Nodiff
M191T49.pos	1.40816e+07	1.46138e+07	1.03779	0.0535198	0.269906	0.735514	1.25029e+07	1.45852e+07	1.38156e+07	1.39182e+07	1.44672e+07	1.52006e+07	1.48716e+07	1.45514e+07	1.52361e+07	1.44888e+07	1.50185e+07	1.35165e+07	0.943565	Diaminopimelic acid	191.04	48.7	190.095	25.5229	C7H14N2O4	[M+H]+	Carboxylic acids and derivatives	Amino acids, peptides, and analogues	C00666		583-93-7 / 14289-34-0 / NA	HMDB0001370	Nodiff
M192T141.neg	2.47006e+06	4.83845e+06	1.95884	0.969998	0.330992	0.793415	2.59345e+06	3.22606e+06	6.30865e+06	174822	297255	2.22012e+06	8.60331e+06	5.73597e+06	3.40342e+06	681216	615951	9.99082e+06	0.687276	Phenylacetylglycine	192.067	140.6	193.074	3.5196	C10H11NO3	[M-H]-	Carboxylic acids and derivatives	Amino acids, peptides, and analogues	C05598	Amino acid metabolism	500-98-1	HMDB0000821	Nodiff
M192T417.pos	7.27233e+06	8.85254e+06	1.21729	0.283673	0.362631	0.795988	1.22751e+06	8.43932e+06	9.25808e+06	8.26594e+06	7.4597e+06	8.98345e+06	5.81092e+06	1.13446e+07	1.13258e+07	9.64892e+06	8.30066e+06	6.68437e+06	0.819369	N,N-Diethyl-m-toluamide	192.138	417.5	191.131	0.0270969	C12H17NO	[M+H]+			C10935		134-62-3		Nodiff
M193T487.pos	9.24915e+06	1.03137e+07	1.1151	0.157169	0.442333	0.845767	8.61631e+06	1.18295e+07	1.57025e+07	3.17706e+06	1.26033e+07	3.56611e+06	1.39335e+07	1.11161e+07	1.04142e+07	7.09241e+06	1.21491e+07	7.17691e+06	0.563478	Jasmonic acid	193.123	487.4	210.126	22.4417	C12H18O3	[M+H-H2O]+	Fatty Acyls	Lineolic acids and derivatives	C08491	Lipid metabolism	59366-47-1/6894-38-8	HMDB0032797	Nodiff
M194T275.pos	9.63488e+06	4.92242e+06	0.510895	-0.9689	0.709327	0.950279	4.10649e+07	9.45052e+06	2.50292e+06	315811	4.43559e+06	39518.9	8.50073e+06	332295	5.96741e+06	1.00049e+06	6.09072e+06	7.64284e+06	0.299742	Sequoyitol	194.081	275.3	194.079	0.622927	C7H14O6	[M]+	Alcohols and polyols	Cyclic alcohols and derivatives	C03365		523-92-2	HMDB0031449	Nodiff
M194T291.pos	2.8982e+07	3.02725e+07	1.04452	0.0628468	0.123253	0.586306	2.61627e+07	3.08033e+07	2.80149e+07	2.98802e+07	2.9117e+07	2.99142e+07	2.97084e+07	3.00261e+07	3.08855e+07	2.98794e+07	3.06584e+07	3.04771e+07	1.40668	3,4-Methylenedioxyamphetamine	194.116	290.9	193.11	0.41206	C11H15NO2	[M+H]+	Benzodioxoles		C07577		4764-17-4 / 42542-10-9	HMDB0041931	Nodiff
M195T100.pos	5.80563e+07	2.77782e+07	0.47847	-1.0635	0.676352	0.942135	2.96034e+08	2.58219e+06	2.53402e+07	2.7382e+06	2.09998e+07	643712	5.93284e+06	2.01029e+06	1.54699e+07	1.53273e+07	4.8446e+07	7.94831e+07	0.381452	Dolichotheline	195.123	100.4	195.137	0.909372	C10H17N3O	[M]+			C16696		23100-08-5		Nodiff
M195T240.pos	836705	556997	0.665703	-0.58705	0.326188	0.776002	157143	777918	851544	1.00896e+06	1.25925e+06	965410	226754	1.00937e+06	255762	256623	841779	751697	0.83228	Caffeine	195.088	239.6	194.08	0.00133404	C8H10N4O2	[M+H]+	Imidazopyrimidines	Purines and purine derivatives	C07481	Biosynthesis of other secondary metabolites	1958-08-02	HMDB0001847	Nodiff
M195T381.pos	3.36135e+07	1.62415e+07	0.483186	-1.04935	0.875797	0.98277	1.62414e+08	4.60833e+06	1.73678e+07	6.14606e+06	8.00772e+06	3.13731e+06	7.32707e+06	3.40838e+06	4.01238e+06	1.94152e+07	5.36985e+07	9.58765e+06	0.145518	Neocnidilide	195.138	381.2	194.131	0.12299	C12H18O2	[M+H]+	Lactones	Gamma butyrolactones	C17002		4567-33-3	HMDB0034450	Nodiff
M195T487.pos	1.80241e+08	9.7476e+07	0.540808	-0.886812	0.0707974	0.489351	1.98832e+08	2.6524e+08	2.77328e+08	1.24745e+08	1.5246e+08	6.28435e+07	9.4479e+07	1.48793e+08	9.65629e+07	9.24963e+07	8.97529e+07	6.27723e+07	1.6057	3-Methyl-L-tyrosine	195.102	486.7	195.089	0.0192185	C10H13NO3	[M]+			C20800				Nodiff
M195T71.pos	5.91629e+07	5.16672e+07	0.873304	-0.195443	0.369508	0.802659	7.04465e+07	7.04462e+07	7.38269e+07	4.92462e+07	5.00906e+07	4.09207e+07	6.03095e+07	6.74082e+07	4.49135e+07	4.97878e+07	5.52273e+07	3.23569e+07	0.898703	D-Glucuronic Acid	195.123	70.9	194.043	1.08905	C6H10O7	[M+H]+			C00191	Carbohydrate metabolism	655612-3		Nodiff
M196T58_1.neg	6.86269e+06	9.39796e+06	1.36943	0.453572	0.402657	0.819832	1.74896e+06	5.10677e+06	7.59573e+06	4.77686e+06	1.04563e+07	1.14915e+07	3.59126e+06	1.66307e+07	1.11717e+07	9.16319e+06	3.94139e+06	1.18895e+07	0.700232	L-Dopa	196	57.8	197.069	6.82447	C9H11NO4	[M-H]-	Carboxylic acids and derivatives	Amino acids, peptides, and analogues	C00355	Nervous system; Endocrine system; Neurodegenerative disease; Amino acid metabolism; Substance dependence	59-92-7	HMDB0000181	Nodiff
M198T49.pos	1.32899e+07	1.71552e+07	1.29084	0.368309	0.779985	0.967162	1.05336e+07	1.79459e+07	2.27318e+07	1.3228e+07	9.6251e+06	5.67512e+06	1.60077e+07	4.45876e+07	1.96159e+07	9.18611e+06	7.53421e+06	5.99944e+06	0.161774	N-Acetylhistidine	198.085	49.4	197.08	11.49	C8H11N3O3	[M+H]+	Carboxylic acids and derivatives	Amino acids, peptides, and analogues	C02997		2497-02-01	HMDB0032055	Nodiff
M198T640.pos	2.26861e+07	2.05556e+07	0.906087	-0.142278	0.804922	0.970085	2.22252e+07	1.5392e+07	4.9788e+07	1.92305e+07	2.0161e+07	9.32011e+06	2.69657e+07	8.42584e+06	2.39558e+07	9.27139e+06	2.84286e+07	2.62864e+07	0.237403	Vanillylmandelic acid	198.185	640.2	198.053	1.67747	C9H10O5	[M]+	Phenols	Methoxyphenols	C05584	Amino acid metabolism	1955-10-07	HMDB0000291	Nodiff
M199T528.neg	6.57383e+08	3.66743e+08	0.557884	-0.841963	0.0919302	0.668202	7.46798e+08	7.50926e+08	6.62432e+08	4.96548e+08	1.07768e+09	2.09916e+08	3.50233e+08	1.70648e+08	4.9028e+08	4.73842e+08	4.5611e+08	2.59346e+08	1.36209	N-Acetylserotonin	199.17	527.6	218.106	6.17428	C12H14N2O2	[M-H2O-H]-	Indoles and derivatives	Hydroxyindoles	C00978	Amino acid metabolism	1210-83-9	HMDB0001238	Nodiff
M200T79.pos	1.55493e+08	2.04811e+08	1.31717	0.397438	0.545448	0.894448	8.17286e+06	2.89926e+07	7.33952e+08	5.25964e+07	3.79788e+07	7.12664e+07	4.67312e+07	9.49612e+08	4.82355e+07	5.93563e+07	8.01234e+07	4.48051e+07	0.468217	Dodecanoic acid	199.989	78.9	200.178	5.0834	C12H24O2	[M]+	Fatty Acyls	Fatty acids and conjugates	C02679	Lipid metabolism	143-07-7	HMDB0000638	Nodiff
M203T49.pos	1.96318e+08	4.8741e+07	0.248276	-2.00999	0.183629	0.662554	8.99851e+08	4.03715e+07	8.11534e+07	5.45655e+07	8.84425e+07	1.35252e+07	1.41239e+08	1.95438e+07	2.88273e+07	5.24575e+06	5.05962e+06	9.25302e+07	1.15456	Asymmetric dimethylarginine	203.15	48.5	202.143	0.00348515	C8H18N4O2	[M+H]+	Carboxylic acids and derivatives	Amino acids, peptides, and analogues	C03626		30315-93-6 / 220805-22-1	HMDB0001539	Nodiff
M204T288.pos	4.80742e+07	1.98713e+07	0.413347	-1.27458	0.4105	0.826749	1.6947e+08	2.95178e+07	3.46351e+07	9.63582e+06	4.41785e+07	1.00806e+06	3.79418e+07	686612	6.08799e+06	2.1842e+06	4.28608e+07	2.94663e+07	0.736825	N5-(L-1-Carboxyethyl)-L-ornithine	204.123	287.8	204.111	1.05236	C8H16N2O4	[M]+			C04210				Nodiff
M204T59.pos	5.3237e+08	4.86571e+08	0.913972	-0.129779	0.789608	0.969201	1.87991e+09	1.78027e+08	3.79906e+08	4.37449e+08	2.18055e+08	1.00879e+08	9.07708e+08	9.56272e+07	2.00145e+08	4.40791e+08	7.7095e+08	5.04207e+08	0.241843	O-Acetylcarnitine	204.123	59.1	204.124	0.703514	C9H18NO4	[M+H]+			C02571	Endocrine and metabolic disease	5080-50-2		Nodiff
M205T184.pos	1.24796e+09	6.85991e+08	0.549689	-0.863312	0.129757	0.59718	1.82558e+09	1.81617e+09	1.71835e+09	7.34703e+08	1.00984e+09	3.83127e+08	7.56896e+08	4.86564e+08	7.16282e+08	7.50013e+08	5.54431e+08	8.51761e+08	1.37331	L-Tryptophan	205.097	183.5	204.09	0.246047	C11H12N2O2	[M+H]+	Indoles and derivatives	Indolyl carboxylic acids and derivatives	C00078	Cancer: overview; Nervous system; Digestive system; Translation; Amino acid metabolism; Infectious disease: parasitic	73-22-3	HMDB0000929	Nodiff
M205T550.neg	9.22866e+06	8.66349e+06	0.938759	-0.0911736	0.531113	0.859521	1.04064e+07	1.20188e+07	1.00723e+07	6.36462e+06	7.42463e+06	9.08508e+06	7.4095e+06	1.23355e+07	1.46468e+07	2.3846e+06	6.08112e+06	9.12331e+06	0.74501	Methyl jasmonate	205.16	549.6	224.141	2.78864	C13H20O3	[M-H2O-H]-	Fatty Acyls	Lineolic acids and derivatives	C11512	Lipid metabolism	1211-29-6 / 39924-52-2	HMDB0036583	Nodiff
M206T307.pos	1.31922e+06	1.46601e+06	1.11128	0.152217	0.300611	0.76084	1.72086e+06	968441	1.23911e+06	1.43322e+06	1.48324e+06	1.07044e+06	1.36083e+06	1.62888e+06	1.33904e+06	1.69994e+06	1.59316e+06	1.17422e+06	0.8989	Indolelactic acid	206.081	307.1	205.074	0.00136939	C11H11NO3	[M+H]+	Indoles and derivatives	Indolyl carboxylic acids and derivatives	C02043		1821-52-9	HMDB0000671	Nodiff
M208T297.pos	3.01097e+06	3.28796e+06	1.09199	0.126963	0.435653	0.842978	2.56746e+06	3.52477e+06	3.39038e+06	3.01757e+06	2.74304e+06	2.8226e+06	3.57556e+06	2.45437e+06	2.73918e+06	4.2978e+06	3.29239e+06	3.36847e+06	0.675886	N-Acetyl-L-phenylalanine	208.097	297.2	207.089	0.849577	C11H13NO3	[M+H]+	Carboxylic acids and derivatives	Amino acids, peptides, and analogues	C03519	Amino acid metabolism	2018-61-3	HMDB0000512	Nodiff
M209T499.pos	1.06619e+07	1.20379e+07	1.12906	0.175127	0.110116	0.565388	1.26793e+07	1.01527e+07	1.00138e+07	1.03468e+07	1.05122e+07	1.02664e+07	9.85501e+06	1.26745e+07	1.16865e+07	1.47995e+07	1.12127e+07	1.19993e+07	1.37565	Ethirimol	209.154	499.4	209.153	0.0289345	C11H19N3O	[M]+			C18828		23947-60-6		Nodiff
M209T51.neg	1.3381e+08	6.06301e+07	0.453106	-1.14208	0.156217	0.711016	4.31334e+08	8.91396e+07	7.85584e+07	5.58033e+07	8.41018e+07	6.39221e+07	5.66038e+07	4.78795e+07	7.99367e+07	3.89283e+07	4.96479e+07	9.07843e+07	1.3184	Sedoheptulose	209.067	51.5	210.074	1.32015	C7H14O7	[M-H]-	Organooxygen compounds	Carbohydrates and carbohydrate conjugates	C02076		3019-74-7	HMDB0003219	Nodiff
M211T500.pos	4.88927e+06	4.7473e+06	0.970963	-0.0425119	0.89474	0.986775	6.66152e+06	3.47917e+06	5.88445e+06	5.12756e+06	4.03714e+06	4.14577e+06	5.86417e+06	4.65056e+06	3.83736e+06	5.10617e+06	3.74496e+06	5.28057e+06	0.145806	(+)-7-Isojasmonic acid	211.133	499.8	210.126	0.0254733	C12H18O3	[M+H]+			C16317	Lipid metabolism	62653-85-4		Nodiff
M215T329.neg	1.29966e+06	1.65722e+06	1.27512	0.35063	0.34355	0.799338	1.01178e+06	1.22887e+06	3.42153e+06	1.01909e+06	529665	587045	1.03352e+06	1.68606e+06	3.05201e+06	2.07056e+06	688118	1.41305e+06	0.842211	12-Hydroxydodecanoic acid	215.166	329.4	216.173	2.67701	C12H24O3	[M-H]-	Hydroxy acids and derivatives	Medium-chain hydroxy acids and derivatives	C08317		505-95-3	HMDB0002059	Nodiff
M215T67.pos	2.58943e+07	3.10916e+07	1.20071	0.263886	0.223919	0.698212	2.17476e+07	2.65511e+07	2.45289e+07	3.06249e+07	2.94577e+07	2.24559e+07	2.39418e+07	2.92173e+07	2.37136e+07	4.33518e+07	4.01964e+07	2.61284e+07	1.08798	Dethiobiotin	215.139	66.8	214.132	0.0002837	C10H18N2O3	[M+H]+	Fatty Acyls	Fatty acids and conjugates	C01909	Metabolism of cofactors and vitamins	533-48-2	HMDB0003581	Nodiff
M216T77.pos	1.4658e+07	1.93501e+07	1.32011	0.400656	0.747853	0.958021	4.69291e+07	6.24761e+06	1.717e+07	7.31989e+06	6.78719e+06	3.49417e+06	1.48952e+07	776893	1.29201e+07	2.70158e+07	3.82474e+07	2.22454e+07	0.313959	Tetrahydroharmine	216.123	77.1	216.126	0.574871	C13H16N2O	[M]+			C09243		17019-01-1		Nodiff
M217T309.pos	5.15646e+06	4.05722e+06	0.786823	-0.34589	0.808082	0.970456	1.77911e+07	2.70078e+06	2.58103e+06	3.9923e+06	3.36468e+06	508878	5.82713e+06	1.13417e+06	2.79841e+06	3.3993e+06	6.68359e+06	4.5007e+06	0.225938	N-a-Acetylcitrulline	217.107	309.1	217.106	0.521162	C8H15N3O4	[M]+	Carboxylic acids and derivatives	Amino acids, peptides, and analogues	C15532	Amino acid metabolism	33965-42-3	HMDB0000856	Nodiff
M217T60.pos	1.15691e+07	1.35703e+07	1.17298	0.230173	0.730442	0.954463	2.00096e+07	8.13125e+06	1.14939e+07	1.49333e+07	7.86611e+06	6.98062e+06	1.56768e+07	3.66032e+06	1.11124e+07	1.89942e+07	1.95455e+07	1.24326e+07	0.34991	N-[(2S)-2-Amino-2-carboxyethyl]-L-glutamate	217.082	60.1	234.085	19.5045	C8H14N2O6	[M+H-H2O]+			C21559				Nodiff
M217T86.pos	5.08799e+06	5.15684e+06	1.01353	0.0193917	0.89644	0.986781	5.32169e+06	4.70766e+06	5.67761e+06	5.19272e+06	5.02485e+06	4.60342e+06	4.19338e+06	5.88285e+06	5.76331e+06	4.69435e+06	5.56618e+06	4.84099e+06	0.125022	beta-Alanyl-L-lysine	217.155	85.5	217.143	0.0696185	C9H19N3O3	[M]+	Peptidomimetics	Hybrid peptides	C05341	Metabolism of other amino acids		HMDB0060442	Nodiff
M218T67.pos	4.57545e+07	3.88332e+07	0.848729	-0.236625	0.881869	0.983767	3.13326e+06	6.11184e+07	5.56248e+07	4.31259e+07	4.98225e+07	6.17024e+07	1.69127e+07	4.19353e+07	6.29466e+07	3.64913e+07	3.98539e+07	3.48594e+07	0.154073	Propionylcarnitine	218.139	66.8	217.131	0.531368	C10H19NO4	[M+H]+	Fatty Acyls	Fatty acid esters	C03017		17298-37-2	HMDB0000824	Nodiff
M219T365.pos	6.53817e+06	7.87977e+06	1.2052	0.269267	0.259616	0.728115	2.12786e+06	7.37919e+06	7.57668e+06	7.28555e+06	7.51142e+06	7.34831e+06	6.8257e+06	8.26868e+06	7.7613e+06	7.90376e+06	8.27057e+06	8.24859e+06	1.02767	Capsidiol	219.174	364.6	236.178	2.28129	C15H24O2	[M+H-H2O]+	Prenol lipids	Sesquiterpenoids	C09627		37208-05-2	HMDB0002352	Nodiff
M219T62.pos	7.22777e+06	6.8534e+06	0.948204	-0.0767314	0.461253	0.852893	6.8901e+06	7.93269e+06	8.90011e+06	6.50191e+06	6.11982e+06	7.02198e+06	6.63217e+06	7.06566e+06	6.89309e+06	7.22512e+06	6.47109e+06	6.83324e+06	0.73419	gamma-Glutamylalanine	219.097	62.2	NA	0.0053781	C7H11N2O5R	[M+H]+	Carboxylic acids and derivatives	Amino acids, peptides, and analogues	C03740	Metabolism of other amino acids	5875-41-2	HMDB0006248	Nodiff
M220T109.pos	2.29138e+07	3.98823e+07	1.74054	0.799534	0.100464	0.548955	5.95716e+06	1.92208e+06	8.87446e+07	4.03172e+06	2.84322e+07	8.39488e+06	2.96768e+07	1.50062e+07	9.07074e+07	4.031e+07	4.74971e+07	1.60965e+07	1.36353	Pantothenic acid	220.118	109	219.111	0.563334	C9H17NO5	[M+H]+	Alcohols and polyols	Polyols	C00864	Metabolism of cofactors and vitamins; Metabolism of other amino acids; Digestive system	79-83-4 / 20938-62-9 / 137-08-6	HMDB0000210	Nodiff
M220T53.neg	1.77241e+07	3.05122e+07	1.72151	0.783673	0.528749	0.859405	2.24798e+07	4.25771e+06	6.72893e+06	3.31834e+07	2.39308e+07	1.57642e+07	7.51518e+06	2.04235e+07	3.80835e+06	4.34286e+07	5.0625e+07	5.72727e+07	0.712256	N-Acetylmannosamine	220.083	52.8	221.09	2.61719	C8H15NO6	[M-H]-	Organooxygen compounds	Carbohydrates and carbohydrate conjugates	C00645	Carbohydrate metabolism	7772-94-3 / 3615-17-6	HMDB0001129	Nodiff
M221T522.neg	1.62678e+07	6.63411e+06	0.407805	-1.29405	0.760391	0.934428	6.67145e+07	7.78019e+06	5.2071e+06	1.04041e+07	6.79386e+06	707226	8.89466e+06	2.01805e+06	4.52892e+06	5.44688e+06	9.56955e+06	9.34659e+06	0.190804	N-Acetyl-D-glucosamine	221.155	521.8	221.09	2.72349	C8H15NO6	[M]-	Organooxygen compounds	Carbohydrates and carbohydrate conjugates	C00140	Carbohydrate metabolism; Membrane transport	7512-17-6	HMDB0000215	Nodiff
M224T392.pos	3.06978e+06	2.70951e+06	0.882638	-0.180107	0.647802	0.932248	2.529e+06	3.59275e+06	3.80889e+06	2.85062e+06	4.48306e+06	1.15439e+06	1.20628e+06	2.15013e+06	3.86726e+06	3.11296e+06	1.82071e+06	4.0997e+06	0.369446	(2S)-Flavanone	224.092	391.5	224.084	0.443591	C15H12O2	[M]+			C02099		487-26-3		Nodiff
M224T41.pos	1.1564e+07	1.32721e+07	1.1477	0.198751	0.255811	0.725734	7.30507e+06	1.32496e+07	1.28243e+07	1.06993e+07	1.22422e+07	1.30635e+07	1.10178e+07	1.76656e+07	1.12543e+07	1.23429e+07	1.47186e+07	1.26331e+07	0.94647	Hydroxykynurenine	223.99	41.4	224.08	7.77175	C10H12N2O4	[M]+	Organooxygen compounds	Carbonyl compounds	C02794		484-78-6 / 2147-61-7	HMDB0000732	Nodiff
M227T44.pos	2.79443e+07	2.65617e+07	0.950522	-0.0732081	0.855277	0.980658	4.01218e+07	2.32777e+07	2.23474e+07	3.83397e+07	2.44642e+07	1.91154e+07	2.88454e+07	2.261e+07	3.27912e+07	3.07975e+07	2.56622e+07	1.86641e+07	0.127055	Carnosine	227.114	44.2	226.107	0.880615	C9H14N4O3	[M+H]+	Peptidomimetics	Hybrid peptides	C00386	Amino acid metabolism; Metabolism of other amino acids	305-84-0	HMDB0000033	Nodiff
M227T491.pos	3.58752e+06	2.16027e+06	0.602163	-0.731774	0.740673	0.956373	1.41865e+07	1.64786e+06	2.17015e+06	2.36829e+06	915352	236973	6.03594e+06	973318	408923	469424	1.57382e+06	3.50022e+06	0.322689	Myristoleic acid	227.201	491.3	226.193	1.32042	C14H26O2	[M+H]+	Fatty Acyls	Fatty acids and conjugates	C08322		544-64-9/NA	HMDB0002000	Nodiff
M227T640_2.pos	2.23723e+07	1.22686e+07	0.548386	-0.866737	0.0873547	0.52105	6.20869e+06	1.9783e+07	2.6826e+07	2.77257e+07	2.57939e+07	2.78963e+07	8.1065e+06	1.59021e+07	1.51005e+07	1.77116e+07	8.53297e+06	8.25817e+06	1.42017	Deoxycytidine	227.184	640.2	227.091	0.0275108	C9H13N3O4	[M]+	Pyrimidine nucleosides	Pyrimidine 2'-deoxyribonucleosides	C00881	Membrane transport; Nucleotide metabolism	951-77-9	HMDB0000014	Nodiff
M228T603.neg	9.02515e+07	8.1958e+07	0.908106	-0.139067	0.664113	0.901661	1.39555e+08	9.62734e+07	4.17883e+07	8.02136e+07	7.66707e+07	1.07008e+08	8.55701e+07	4.11839e+07	4.69479e+07	1.18009e+08	8.3625e+07	1.16412e+08	0.378159	Resveratrol	228.073	603	228.079	24.1151	C14H12O3	[M]-	Stilbenes		C03582	Aging	501-36-0	HMDB0003747	Nodiff
M228T649.pos	2.07024e+08	1.39528e+08	0.673973	-0.569237	0.696735	0.946021	7.48319e+08	8.69305e+07	1.12237e+08	1.3247e+08	9.8941e+07	6.32458e+07	3.67231e+08	4.61657e+07	9.97544e+07	1.11799e+08	8.34544e+07	1.28766e+08	0.360431	Deoxyuridine	228.196	648.9	228.075	0.895414	C9H12N2O5	[M]+	Pyrimidine nucleosides	Pyrimidine 2'-deoxyribonucleosides	C00526	Membrane transport; Nucleotide metabolism	951-78-0	HMDB0000012	Nodiff
M229T167.pos	5.45479e+06	5.75205e+06	1.05449	0.0765516	0.996891	0.999651	5.64796e+06	3.83029e+06	7.55777e+06	5.21824e+06	5.21616e+06	5.25834e+06	4.66094e+06	1.12327e+07	4.94708e+06	3.87034e+06	4.14608e+06	5.65518e+06	0.0457677	D-Octopine	229.119	167.3	246.133	29.9661	C9H18N4O4	[M+H-H2O]+	Carboxylic acids and derivatives	Amines	C04137	Amino acid metabolism; Membrane transport	34522-32-2		Nodiff
M229T246.neg	1.27428e+06	1.57366e+06	1.23494	0.304442	0.496872	0.84887	54240.9	1.58559e+06	1.4094e+06	799430	2.09232e+06	1.70471e+06	316554	2.09894e+06	2.21852e+06	2.27021e+06	1.19879e+06	1.33898e+06	0.611887	Dodecanedioic acid	229.144	246.3	230.152	0.97755	C12H22O4	[M-H]-	Fatty Acyls	Fatty acids and conjugates	C02678		693-23-2	HMDB0000623	Nodiff
M229T415_1.pos	8.07121e+06	9.12471e+06	1.13052	0.176993	0.420254	0.833528	188633	9.67502e+06	1.17455e+07	1.06259e+07	7.27464e+06	8.91762e+06	6.30495e+06	1.1051e+07	1.18129e+07	1.03598e+07	8.6128e+06	6.60674e+06	0.735275	Myristic acid	229.18	415.3	228.209	3.53097	C14H28O2	[M+H]+	Fatty Acyls	Fatty acids and conjugates	C06424	Lipid metabolism	544-63-8	HMDB0000806	Nodiff
M229T50.pos	1.48461e+07	1.72732e+07	1.16348	0.218449	0.905928	0.987922	2.21719e+07	4.89535e+06	1.89929e+07	8.79199e+06	1.56283e+07	1.8596e+07	4.58913e+07	1.88864e+07	4.27478e+06	1.51449e+07	1.48561e+07	4.58543e+06	0.204098	L-N2-(2-Carboxyethyl)arginine	229.129	49.9	246.133	14.9874	C9H18N4O4	[M+H-H2O]+	Carboxylic acids and derivatives	Amines	C06655				Nodiff
M230T417.pos	4.31947e+06	5.66276e+06	1.31099	0.390653	0.287104	0.748426	346085	5.6778e+06	3.82768e+06	4.47276e+06	5.40342e+06	6.18906e+06	5.47883e+06	8.23247e+06	4.49604e+06	5.59984e+06	4.96802e+06	5.20138e+06	0.954838	D-Ribose 5-phosphate	230.248	417.3	230.019	0.615421	C5H11O8P	[M]+	Organooxygen compounds	Carbohydrates and carbohydrate conjugates	C00117	Metabolism of cofactors and vitamins; Metabolism of other amino acids; Endocrine system; Carbohydrate metabolism; Nucleotide metabolism	3615-55-2 / 4300-28-1 / 4151-19-3 / 62746-84-3	HMDB0001548	Nodiff
M231T59.pos	2.96025e+07	1.14713e+07	0.387511	-1.36769	0.129822	0.59718	9.53996e+07	2.29689e+07	2.17177e+07	1.29349e+07	1.65649e+07	8.02917e+06	1.04997e+07	1.63233e+07	1.43608e+07	7.62101e+06	8.36907e+06	1.16539e+07	1.35922	N-Acetyl-L-2-amino-6-oxopimelate	231.098	58.8	231.074	2.15024	C9H13NO6	[M]+			C05539				Nodiff
M232T120.pos	2.51058e+07	2.65326e+07	1.05683	0.0797457	0.626658	0.925076	1.89595e+07	2.43241e+07	2.08517e+07	3.46723e+07	2.41515e+07	2.76756e+07	2.35309e+07	2.282e+07	3.80732e+07	2.52688e+07	2.43038e+07	2.51989e+07	0.53769	Butyryl-L-carnitine	232.155	120.1	231.147	0.000456269	C11H21NO4	[M+H]+			C02862		25576-40-3	HMDB02013	Nodiff
M234T477.pos	4.40761e+06	5.02797e+06	1.14075	0.189981	0.426071	0.8375	3.26477e+06	4.58411e+06	3.49573e+06	4.74963e+06	5.15216e+06	5.19925e+06	3.84851e+06	8.08742e+06	4.80987e+06	3.94612e+06	4.47483e+06	5.0011e+06	0.715501	Polygodial	234.162	477.3	234.162	0	C15H22O2	[M]+	Endogenous Metabolites		C09712		6754-20-7		Nodiff
M235T264.pos	2.65153e+06	2.6417e+06	0.996293	-0.00535774	0.922214	0.989732	3.05551e+06	2.96513e+06	1.19024e+06	2.70446e+06	3.05325e+06	2.94061e+06	3.27042e+06	1.56327e+06	2.81654e+06	2.59348e+06	2.94629e+06	2.66022e+06	0.152535	Lidocaine	235.181	264.2	234.173	0.85041	C14H22N2O	[M+H]+	Benzene and substituted derivatives	Xylenes	C07073	Xenobiotics biodegradation and metabolism	137-58-6	HMDB0014426	Nodiff
M235T555.pos	1.18379e+07	1.23051e+07	1.03947	0.0558478	0.269478	0.735244	1.32097e+07	1.15014e+07	1.21342e+07	1.13656e+07	1.12624e+07	1.1554e+07	1.32277e+07	1.30748e+07	1.21661e+07	1.15626e+07	1.18841e+07	1.19153e+07	0.867048	Confertifolin	235.169	554.6	234.162	0.00950265	C15H22O2	[M+H]+			C09376		1811-23-0		Nodiff
M241T44.pos	4.13509e+07	4.65333e+07	1.12533	0.170346	0.363905	0.797191	616992	6.51017e+07	3.47109e+07	7.57474e+07	5.22318e+06	6.67052e+07	4.47497e+07	7.61452e+07	4.65691e+07	3.03487e+07	1.51399e+07	6.62473e+07	0.832136	Anserine	241.13	44.4	240.122	0.00272245	C10H16N4O3	[M+H]+	Peptidomimetics	Hybrid peptides	C01262	Amino acid metabolism; Metabolism of other amino acids	584-85-0	HMDB0000194	Nodiff
M241T620.neg	1.60077e+08	3.92369e+07	0.245114	-2.02848	0.284896	0.767582	7.2159e+08	4.51408e+07	4.61142e+07	7.77871e+07	5.96043e+07	1.0223e+07	7.90672e+07	4.05324e+06	3.68308e+07	2.66494e+07	3.44703e+07	5.43506e+07	0.887953	Pentadecanoic acid	241.217	619.9	242.225	0.0174117	C15H30O2	[M-H]-	Fatty Acyls	Fatty acids and conjugates	C16537		1002-84-2	HMDB0000826	Nodiff
M242T384.pos	4.39362e+06	5.4723e+06	1.24551	0.316737	0.30603	0.765976	1.42951e+07	1.46997e+06	5.57406e+06	1.60981e+06	1.61447e+06	1.79834e+06	9.31275e+06	2.90207e+06	5.27294e+06	4.96313e+06	8.57395e+06	1.80896e+06	0.832013	Equol	242.284	383.8	242.094	0.700023	C15H14O3	[M]+	Isoflavonoids	Isoflavans	C14131		531-95-3	HMDB0002209	Nodiff
M242T649.neg	5.37058e+07	2.57645e+07	0.479734	-1.05969	0.129196	0.69981	5.02633e+07	2.41963e+07	5.4032e+07	1.11287e+08	6.74228e+07	1.5034e+07	3.24987e+07	3.67182e+06	2.20952e+07	1.927e+07	5.12397e+07	2.58119e+07	1.17648	Thymidine	242.176	648.6	242.09	0.408411	C10H14N2O5	[M]-	Pyrimidine nucleosides	Pyrimidine 2'-deoxyribonucleosides	C00214	Nucleotide metabolism	50-89-5	HMDB0000273	Nodiff
M243T158.pos	1.20693e+08	1.56348e+08	1.29542	0.373418	0.223149	0.698102	1.16413e+08	1.57623e+08	6.18272e+07	1.7758e+08	1.03891e+08	1.06827e+08	1.61321e+08	1.29697e+08	2.07869e+08	1.3576e+08	8.67533e+07	2.1669e+08	1.12258	1-Hexadecanol	243.183	157.8	242.261	2.22965	C16H34O	[M+H]+	Fatty Acyls	Fatty alcohols	C00823	Lipid metabolism	36653-82-4	HMDB0003424	Nodiff
M243T55.neg	3.76574e+07	2.05624e+07	0.546038	-0.872927	0.227416	0.741527	1.04919e+08	2.3854e+07	3.81787e+07	2.01608e+07	2.33286e+07	1.55025e+07	2.7786e+07	1.19437e+07	1.96841e+07	2.33015e+07	1.85791e+07	2.20798e+07	1.07375	Pseudouridine	243.062	55.3	244.07	0.164139	C9H12N2O6	[M-H]-	Nucleoside and nucleotide analogues		C02067	Nucleotide metabolism	1445-07-4	HMDB0000767	Nodiff
M243T64.neg	1.38445e+09	3.94585e+08	0.285013	-1.8109	0.764115	0.935097	6.87051e+09	2.95994e+08	6.91238e+08	1.9874e+08	2.04819e+08	4.5371e+07	4.3546e+08	2.98716e+07	2.6861e+08	6.13598e+08	5.36972e+08	4.82999e+08	0.196155	Uridine	243.062	64.5	244.07	1.74441	C9H12N2O6	[M-H]-	Pyrimidine nucleosides		C00299	Membrane transport; Nucleotide metabolism	58-96-8	HMDB0000296	Nodiff
M244T51.pos	1.13965e+09	1.80621e+09	1.58488	0.664374	0.634802	0.927798	1.6742e+08	2.42941e+08	5.06663e+09	2.98336e+08	7.2022e+08	3.4235e+08	1.53752e+09	7.94818e+09	2.87041e+08	3.31442e+08	4.96038e+08	2.3704e+08	0.306063	Cytidine	244.092	51.2	243.085	2.76945	C9H13N3O5	[M+H]+			C00475	Membrane transport; Nucleotide metabolism	65-46-3		Nodiff
M247T147.pos	1.76455e+06	855905	0.485055	-1.04378	0.260742	0.729296	2.98087e+06	2.58295e+06	2.32838e+06	1.98863e+06	409444	297037	768605	417201	1.20686e+06	389926	401912	1.95092e+06	0.958308	N-Acetyl-D-tryptophan	247.129	147.2	246.1	0.458407	C13H14N2O3	[M+H]+			C03137		2280-01-05		Nodiff
M249T281.pos	6.77657e+06	4.34616e+06	0.641352	-0.640813	0.101595	0.55056	6.70182e+06	1.00648e+07	9.20433e+06	6.39856e+06	5.4173e+06	2.87266e+06	4.83732e+06	3.68557e+06	4.08501e+06	7.15254e+06	2.47547e+06	3.84107e+06	1.4067	Pindolol	249.159	281	248.153	1.91042	C14H20N2O2	[M+H]+	Indoles and derivatives	Indoles	C07445		13523-86-9	HMDB0015095	Nodiff
M249T53.neg	2.20551e+08	1.31147e+08	0.594635	-0.749925	0.266532	0.757326	4.83433e+08	2.26926e+08	2.06322e+08	1.93022e+08	1.64629e+08	4.89775e+07	2.84489e+08	8.00503e+07	1.05145e+08	9.93309e+07	1.14345e+08	1.03524e+08	0.971509	gamma-Glutamylcysteine	248.96	53.1	250.062	0.0348602	C8H14N2O5S	[M-H]-	Carboxylic acids and derivatives	Amino acids, peptides, and analogues	C00669	Cell growth and death; Metabolism of other amino acids	636-58-8	HMDB0001049	Nodiff
M250T416.pos	8.40992e+07	7.79415e+07	0.92678	-0.109701	0.54715	0.894471	7.12011e+07	9.29842e+07	3.3201e+07	1.11582e+08	1.05119e+08	9.05077e+07	6.21128e+07	4.36805e+07	7.62232e+07	1.68377e+07	9.57812e+07	1.73014e+08	0.455539	Alprenolol	250.178	416	249.173	9.81298	C15H23NO2	[M+H]+	Therapeutics/Prescription Drugs		D07156				Nodiff
M251T508.pos	3.06112e+07	1.32187e+07	0.431827	-1.21148	0.36797	0.801223	1.11643e+08	9.47915e+06	2.44443e+07	1.73664e+07	1.43113e+07	6.42263e+06	1.79104e+07	2.39397e+07	1.0866e+07	8.45339e+06	7.63856e+06	1.05043e+07	0.84362	OPEO	251.201	508.5	250.193	1.3691	C16H26O2	[M+H]+	Extractables/Leachables; Textile Chemicals/Auxiliary/Dyes		D05229				Nodiff
M252T42_1.neg	1.94227e+06	284552	0.146505	-2.77098	0.936107	0.985758	1.07509e+07	70807	793057	20493	13169.2	5182.58	781345	1043.94	17501.3	340808	276378	290239	0.022671	Neopterin	251.867	42.2	253.081	0.689553	C9H11N5O4	[M-H]-	Pteridines and derivatives	Pterins and derivatives	C05926	Metabolism of cofactors and vitamins	2009-64-5	HMDB0000845	Nodiff
M252T51.pos	2.82033e+07	2.92805e+07	1.0382	0.0540791	0.728619	0.953295	3.41041e+07	3.90571e+07	3.76772e+07	1.08944e+07	3.50201e+07	1.24667e+07	2.84382e+07	3.28899e+07	2.63958e+07	1.3095e+07	4.19007e+07	3.29635e+07	0.223965	Muramic acid	252.107	50.8	251.101	1.88808	C9H17NO7	[M+H]+	Organooxygen compounds	Carbohydrates and carbohydrate conjugates	C06470		1114-41-6/484-57-1	HMDB0003254	Nodiff
M253T445.pos	3.00233e+06	2.51586e+06	0.83797	-0.25503	0.972258	0.994205	3.73093e+06	1.0409e+06	2.92634e+06	8.18797e+06	1.04916e+06	1.07865e+06	4.27412e+06	1.16149e+06	1.17416e+06	1.26598e+06	3.80201e+06	3.41739e+06	0.010406	16-Oxopalmitate	253.216	444.9	270.219	15.9311	C16H30O3	[M+H-H2O]+			C19614				Nodiff
M253T664.neg	6.49053e+07	3.13939e+07	0.483688	-1.04785	0.0461939	0.643426	9.55492e+07	8.44401e+07	8.4403e+07	6.19828e+07	3.95524e+07	2.35044e+07	4.25625e+07	9.97394e+06	2.71867e+07	3.353e+07	4.26996e+07	3.24109e+07	1.6125	Palmitoleic acid	253.219	664.3	254.225	7.80351	C16H30O2	[M-H]-	Fatty Acyls	Fatty acids and conjugates	C08362	Lipid metabolism	373-49-9	HMDB0003229	Down
M255T518.pos	5.85707e+07	5.37993e+07	0.918536	-0.122592	0.948602	0.991995	9.20108e+07	2.90386e+07	9.28902e+07	4.34533e+07	6.51075e+07	2.89242e+07	5.19972e+07	5.25821e+07	7.27308e+07	5.46319e+07	4.89451e+07	4.1909e+07	0.0122138	16-Hydroxy hexadecanoic acid	255.232	517.9	272.235	15.4135	C16H32O3	[M+H-H2O]+	Fatty Acyls	Fatty acids and conjugates	C18218		506-13-8	HMDB0006294	Nodiff
M255T677.neg	1.29486e+08	1.50609e+08	1.16314	0.218019	0.232125	0.743019	1.76224e+08	1.29232e+08	1.22093e+08	1.42179e+08	1.35721e+08	7.14643e+07	1.45861e+08	1.6312e+08	1.43613e+08	1.76258e+08	1.57429e+08	1.17375e+08	1.21133	Palmitic acid	255.233	677.1	256.24	1.47316	C16H32O2	[M-H]-	Fatty Acyls	Fatty acids and conjugates	C00249	Lipid metabolism	1957-10-03	HMDB0000220	Nodiff
M256T48_2.neg	7.11079e+06	1.01367e+07	1.42554	0.511506	0.333136	0.794116	1.0108e+07	5.73581e+06	9.85888e+06	7.30391e+06	4.15974e+06	5.4984e+06	6.66458e+06	6.85236e+06	9.35012e+06	4.14455e+06	1.81718e+07	1.56368e+07	0.899077	N2-gamma-Glutamylglutamine	256.094	47.6	275.112	2.30384	C10H17N3O6	[M-H2O-H]-	Carboxylic acids and derivatives	Amino acids, peptides, and analogues	C05283		10148-81-9/1466-50-8	HMDB0011738	Nodiff
M265T221.pos	7.45338e+06	1.16485e+07	1.56285	0.644183	0.235898	0.710093	91638.5	3.85577e+06	2.14753e+07	4.53935e+06	2.32195e+06	1.24363e+07	5.2452e+06	1.27095e+07	6.37913e+06	1.9984e+07	2.17507e+07	3.8227e+06	1.0316	Subaphylline	265.155	221	264.147	0.467651	C14H20N2O3	[M+H]+	Cinnamic acids and derivatives	Hydroxycinnamic acids and derivatives	C10497	Amino acid metabolism	501-13-3	HMDB0033463	Nodiff
M265T682.neg	4.20303e+07	2.07783e+07	0.494366	-1.01635	0.876378	0.971786	1.86042e+08	1.03513e+07	1.42056e+07	1.34802e+07	1.31345e+07	1.49682e+07	3.8222e+07	2.18947e+07	8.12262e+06	1.9736e+07	1.83292e+07	1.83655e+07	0.135227	Practolol	265.149	681.9	266.163	27.2451	C14H22N2O3	[M-H]-	Benzene and substituted derivatives	Anilides	C11696		6673-35-4	HMDB0015411	Nodiff
M267T465.neg	5.75678e+07	7.23968e+07	1.25759	0.330665	0.229086	0.74153	1.30109e+08	3.66749e+07	5.05648e+07	3.43299e+07	5.44617e+07	3.92668e+07	8.40034e+07	1.06096e+08	4.6888e+07	8.34145e+07	5.44055e+07	5.95729e+07	1.08378	Formononetin	267.197	464.7	268.074	20.2496	C16H12O4	[M-H]-	Isoflavonoids	O-methylated isoflavonoids	C00858		485-72-3	HMDB0005808	Nodiff
M267T492.neg	7.39125e+06	9.9528e+06	1.34656	0.429284	0.00709623	0.615984	9.14301e+06	6.7734e+06	8.05449e+06	7.4587e+06	7.32095e+06	5.59696e+06	9.04829e+06	1.07363e+07	8.85756e+06	1.20974e+07	1.05681e+07	8.40906e+06	2.18924	Hexadecanedioate	267.196	491.8	286.214	0.0374257	C16H30O4	[M-H2O-H]-	Fatty Acyls	Fatty acids and conjugates	C19615		505-54-4	HMDB0000672	Up
M267T66.neg	5.60236e+06	1.50298e+07	2.68277	1.42372	0.00148434	0.569986	4.18014e+06	3.25663e+06	4.65929e+06	5.85465e+06	4.59378e+06	1.10696e+07	1.04267e+07	1.1251e+07	1.46767e+07	2.44243e+07	1.99881e+07	9.41205e+06	2.36976	Inosine	267.073	66.1	268.081	2.99544	C10H12N4O5	[M-H]-	Purine nucleosides		C00294	Membrane transport; Nucleotide metabolism	58-63-9	HMDB0000195	Up
M268T63.pos	7.52829e+06	4.8891e+06	0.649431	-0.622751	0.15559	0.628146	7.88796e+06	9.90348e+06	8.61765e+06	7.46864e+06	2.48354e+06	8.80845e+06	6.56989e+06	9.97723e+06	6.10433e+06	2.0194e+06	2.40395e+06	2.25984e+06	1.25598	Adenosine	268.103	62.8	267.097	1.86495	C10H13N5O4	[M+H]+	Purine nucleosides		C00212	Circulatory system; Membrane transport; Signal transduction; Endocrine system; Neurodegenerative disease; Signaling molecules and interaction; Nucleotide metabolism; Substance dependence	58-61-7	HMDB0000050	Nodiff
M269T508.neg	2.7246e+07	1.60195e+07	0.587957	-0.766218	0.683552	0.907747	1.06426e+08	9.4818e+06	1.47571e+07	1.61425e+07	1.11442e+07	5.52417e+06	2.55231e+07	1.55158e+06	1.29149e+07	1.96522e+07	1.88228e+07	1.76523e+07	0.274687	Dehydroepiandrosterone	269.213	508.3	288.209	1.5854	C19H28O2	[M-H2O-H]-	Steroids and steroid derivatives	Androstane steroids	C01227	Lipid metabolism; Cancer: overview; Endocrine system; Cancer: specific types	53-43-0	HMDB0000077	Nodiff
M271T138.neg	3.69001e+06	3.30727e+06	0.896275	-0.157987	0.584679	0.878905	2.98111e+06	2.99011e+06	2.28513e+06	4.36696e+06	4.90713e+06	4.60964e+06	3.09592e+06	3.75302e+06	3.31e+06	3.30491e+06	2.78415e+06	3.59559e+06	0.495168	N2-Malonyl-D-tryptophan	271.07	137.8	290.09	6.30829	C14H14N2O5	[M-H2O-H]-	Azacyclic compounds	Amino acids, peptides, and analogues	C03414				Nodiff
M271T445.pos	3.78296e+06	5.6079e+06	1.48241	0.567942	0.127192	0.593608	7.09598e+06	875874	1.58387e+06	4.57888e+06	4.89565e+06	3.66754e+06	5.82854e+06	5.17569e+06	6.42893e+06	6.79936e+06	5.39689e+06	4.01796e+06	1.39654	Genistein	271.226	444.9	270.053	2.73747	C15H10O5	[M+H]+	Isoflavonoids	Isoflav-2-enes	C06563		446-72-0	HMDB0003217	Nodiff
M272T248.pos	9.78709e+06	1.0165e+07	1.03861	0.0546544	0.864865	0.981848	6.90488e+06	1.02277e+07	7.20282e+06	1.15894e+07	1.22308e+07	1.05669e+07	5.58426e+06	1.23653e+07	8.97754e+06	1.22328e+07	1.02337e+07	1.15963e+07	0.234437	17a-Estradiol	272.186	247.5	272.178	4.09167	C18H24O2	[M]+	Steroids and steroid derivatives	Estrane steroids	C02537	Lipid metabolism	57-91-0	HMDB0000429	Nodiff
M272T277.neg	96844.8	122394	1.26382	0.337787	0.351114	0.802164	40109.9	107382	99175.6	107945	142871	83585	96187.4	68901.5	94005.2	202283	163928	109059	0.953205	4-(3-Methylbut-2-enyl)-L-tryptophan	272.15	277.2	272.152	8.0837	C16H20N2O2	[M]-	Azacyclic compounds	Amines	C04290				Nodiff
M275T508.pos	2.24035e+07	1.08496e+07	0.484281	-1.04608	0.530477	0.88875	8.14885e+07	8.37327e+06	1.54965e+07	1.98975e+07	5.93559e+06	3.2298e+06	1.30041e+07	1.51017e+06	6.5581e+06	1.31721e+07	1.64272e+07	1.44259e+07	0.522231	Nandrolone	275.2	508.4	274.193	1.29387	C18H26O2	[M+H]+	Steroids and steroid derivatives	Estrane steroids	C07254		434-22-0	HMDB0002725	Nodiff
M276T61.pos	7.1214e+06	6.19898e+06	0.870472	-0.200131	0.827755	0.975126	6.47882e+06	1.40388e+07	1.62409e+07	1.67317e+06	2.68822e+06	1.60849e+06	1.1246e+07	1.24386e+06	4.75733e+06	8.59884e+06	750542	1.05973e+07	0.246613	Saccharopine	276.108	60.6	276.132	1.02831	C11H20N2O6	[M]+	Carboxylic acids and derivatives	Amino acids, peptides, and analogues	C00449	Amino acid metabolism	997-68-2	HMDB0000279	Nodiff
M276T67.pos	8.59071e+07	8.30022e+07	0.966186	-0.0496271	0.854942	0.980658	1.34933e+08	6.18132e+07	1.26504e+08	7.87889e+07	3.20347e+07	8.13687e+07	3.87272e+07	3.14417e+07	1.22159e+08	1.2766e+08	8.93984e+07	8.86274e+07	0.101465	4-Hydroxycinnamoylagmatine	276.144	66.8	276.159	0.3451	C14H20N4O2	[M]+	Cinnamic acids and derivatives	Hydroxycinnamic acids and derivatives	C04498	Amino acid metabolism	7295-86-5	HMDB0033460	Nodiff
M277T33.pos	3.66161e+07	1.20466e+07	0.328997	-1.60386	0.454264	0.850536	2.11443e+08	2.34389e+06	1.98694e+06	1.24646e+06	1.28846e+06	1.38836e+06	1.90452e+07	3.17605e+06	854920	1.20053e+07	1.73385e+07	1.98596e+07	0.642001	6-Phosphogluconic acid	276.899	33	276.025	8.13539	C6H13O10P	[M+H]+	Organooxygen compounds	Carbohydrates and carbohydrate conjugates	C00345	Carbohydrate metabolism	921-62-0 / 53411-70-4	HMDB0001316	Nodiff
M277T452.pos	1.05912e+07	1.22077e+07	1.15263	0.204929	0.352284	0.789194	8.22063e+06	4.96194e+06	6.78529e+06	2.18999e+07	9.5825e+06	1.20969e+07	8.87998e+06	1.84756e+07	1.08296e+07	1.05295e+07	1.27775e+07	1.17542e+07	0.90735	Stearidonic acid	277.216	451.6	276.209	1.35634	C18H28O2	[M+H]+	Fatty Acyls	Lineolic acids and derivatives	C16300	Lipid metabolism	20290-75-9	HMDB0006547	Nodiff
M279T550.pos	1.37924e+08	9.89352e+07	0.717315	-0.479321	0.316121	0.771534	2.13518e+08	1.17243e+08	1.94153e+08	1.29002e+08	1.27497e+08	4.61333e+07	1.1227e+08	5.44508e+07	1.59178e+08	8.87076e+07	6.8209e+07	1.10796e+08	0.878382	Dibutyl phthalate	279.159	550.3	278.152	1.12773	C16H22O4	[M+H]+	Benzene and substituted derivatives	Benzoic acids and derivatives	C14214		84-74-2	HMDB0033244	Nodiff
M279T555.pos	1.33184e+08	8.9545e+07	0.672339	-0.57274	0.337877	0.78242	3.22088e+08	7.16431e+07	9.09957e+07	5.96766e+07	1.59563e+08	9.51393e+07	8.2237e+07	1.82698e+08	7.86232e+07	3.17179e+07	7.61663e+07	8.58276e+07	0.877706	(9Z,12Z,15Z)-Octadecatrienoic acid	279.231	554.6	278.225	2.06281	C18H30O2	[M+H]+	Fatty Acyls	Lineolic acids and derivatives	C06427	Lipid metabolism	463-40-1	HMDB0001388	Nodiff
M279T567.pos	1.80145e+07	1.93005e+07	1.07139	0.0994834	0.656269	0.935051	3.76182e+07	1.71944e+07	6.76581e+06	2.53781e+07	4.49438e+06	1.66359e+07	3.41389e+07	1.37079e+07	2.75192e+07	9.85809e+06	9.12674e+06	2.14523e+07	0.435117	(9Z,11E,13E)-Octadecatrienoic acid	279.231	566.7	278.225	3.13719	C18H30O2	[M+H]+			C08315		506-23-0		Nodiff
M279T621.pos	6.91049e+06	2.97436e+07	4.30411	2.10572	0.0171534	0.340183	5.10385e+06	4.31153e+06	7.62246e+06	645756	6.8619e+06	1.69175e+07	1.02658e+07	1.812e+07	1.71969e+07	7.52463e+07	4.16226e+07	1.60097e+07	1.83204	13S-hydroxyoctadecadienoic acid	279.232	620.7	296.235	0.71625	C18H32O3	[M+H-H2O]+	Fatty Acyls	Lineolic acids and derivatives	C14762	Lipid metabolism; Endocrine system	5204-88-6/29623-28-7	HMDB0004667	Up
M279T90.neg	3.98524e+06	2.02022e+06	0.506926	-0.980153	0.45211	0.840158	1.32358e+07	2.24943e+06	3.64218e+06	2.26606e+06	1.60334e+06	914667	2.78975e+06	1.14343e+06	2.15354e+06	1.72994e+06	2.30974e+06	1.99492e+06	0.654476	Sulfamethoxypyridazine	279.057	90.1	280.063	3.45821	C11H12N4O3S	[M-H]-	Therapeutics/Prescription Drugs		D02439				Nodiff
M280T493_3.pos	1.22096e+07	3.76113e+07	3.08047	1.62315	0.0235988	0.348074	3.49625e+07	8.51579e+06	8.79773e+06	8.7077e+06	2.04829e+06	1.02255e+07	1.25598e+07	5.34049e+07	2.4623e+07	5.12852e+07	1.57642e+07	6.80306e+07	1.80289	3-Ketosphingosine	280.263	492.9	297.267	13.68	C18H35NO2	[M+H-H2O]+			C06121				Up
M280T565.neg	8.33253e+06	4.39079e+06	0.526945	-0.924275	0.805866	0.946686	3.12575e+07	3.48942e+06	4.91913e+06	7.31023e+06	2.79208e+06	226819	7.94681e+06	223062	4.31633e+06	3.13416e+06	5.16206e+06	5.5623e+06	0.119525	Linoleic acid	280.241	565.4	280.24	3.92519	C18H32O2	[M]-	Fatty Acyls	Lineolic acids and derivatives	C01595	Lipid metabolism	60-33-3	HMDB0000673	Nodiff
M281T495.pos	1.12585e+07	1.30283e+07	1.1572	0.210637	0.38513	0.813417	2.22997e+07	8.19804e+06	8.66146e+06	1.05144e+07	8.27081e+06	9.60659e+06	1.16631e+07	1.09108e+07	1.0614e+07	1.41325e+07	2.13514e+07	9.49824e+06	0.7719	Stearolic acid	281.247	495.2	280.24	1.3369	C18H32O2	[M+H]+	Endogenous Metabolites; Natural Products/Medicines		C08459		506-24-1		Nodiff
M281T527.pos	1.05303e+07	2.00564e+07	1.90463	0.929514	0.012203	0.322559	9.60949e+06	4.4664e+06	7.27321e+06	1.42597e+07	1.29712e+07	1.4602e+07	1.8258e+07	1.80983e+07	2.22909e+07	2.33071e+07	2.52251e+07	1.31592e+07	2.01998	10E,12Z-Octadecadienoic acid	281.247	527.5	280.24	2.84448	C18H32O2	[M+H]+	Fatty Acyls	Lineolic acids and derivatives	C04056	Lipid metabolism	2420-56-6	HMDB0005048	Up
M281T683.neg	1.26116e+09	1.52832e+09	1.21183	0.27719	0.20951	0.735052	2.11062e+09	1.02465e+09	1.37626e+09	1.21138e+09	9.12555e+08	9.31512e+08	1.70376e+09	1.67547e+09	1.55155e+09	1.97133e+09	1.08081e+09	1.18698e+09	1.15466	(6Z)-Octadecenoic acid	281.244	683.1	282.256	13.2577	C18H34O2	[M-H]-			C08363		593-39-5		Nodiff
M282T52.pos	3.66977e+07	4.29125e+07	1.16935	0.225709	0.314731	0.770833	1.12076e+07	3.8848e+07	3.74322e+07	3.7317e+07	4.69106e+07	4.84707e+07	4.73516e+07	4.26288e+07	4.14356e+07	4.36399e+07	4.12015e+07	4.12176e+07	0.907778	1-Methyladenosine	282.118	51.7	281.112	3.63614	C11H15N5O4	[M+H]+	Purine nucleosides		C02494		15763-06-1	HMDB0003331	Nodiff
M282T653.pos	1.09067e+07	1.30602e+07	1.19744	0.259956	0.0998913	0.548692	7.13461e+06	1.25681e+07	1.12383e+07	9.93653e+06	1.1358e+07	1.32046e+07	1.26667e+07	1.2016e+07	1.52261e+07	1.48466e+07	1.24343e+07	1.11712e+07	1.38457	Oleamide	282.285	653.4	281.272	20.6316	C18H35NO	[M+H]+	Fatty Acyls	Fatty amides	C19670		301-02-0	HMDB0002117	Nodiff
M282T663.pos	1.14441e+07	1.1743e+07	1.02612	0.0372008	0.632311	0.926956	1.46559e+06	1.33935e+07	1.38865e+07	1.4896e+07	1.11716e+07	1.38516e+07	1.2444e+07	5.96621e+06	1.14987e+07	1.42075e+07	1.49627e+07	1.13792e+07	0.453116	Oleic acid	282.281	662.5	282.256	4.66047	C18H34O2	[M]+	Fatty Acyls	Fatty acids and conjugates	C00712	Lipid metabolism	112-80-1	HMDB0000207	Nodiff
M283T552.neg	6.7776e+06	6.39397e+06	0.943398	-0.0840619	0.507569	0.849417	5.69749e+06	5.9015e+06	8.31045e+06	7.32812e+06	6.84045e+06	6.5876e+06	5.97223e+06	5.50447e+06	7.01327e+06	8.13586e+06	6.7055e+06	5.03252e+06	0.46645	2-Methoxyestradiol	283.17	551.6	302.188	0.670975	C19H26O3	[M-H2O-H]-	Steroids and steroid derivatives	Estrane steroids	C05302	Lipid metabolism	362-07-2	HMDB0000405	Nodiff
M283T566.pos	4.61703e+07	3.88028e+07	0.840428	-0.250804	0.593283	0.913771	2.49967e+07	5.84987e+07	1.94232e+07	5.00014e+07	7.34535e+07	5.06485e+07	5.40352e+07	5.28566e+07	1.96272e+07	2.39834e+07	2.86683e+07	5.36464e+07	0.468078	(R)-10-Hydroxystearate	283.263	566.4	300.266	14.2414	C18H36O3	[M+H-H2O]+	Carboxylic acids and derivatives	Alcohols and polyols	C03195		638-26-6		Nodiff
M283T637.neg	7.2746e+07	9.04586e+07	1.24348	0.314389	0.081161	0.656297	1.1092e+08	5.94743e+07	7.81458e+07	6.8297e+07	6.67361e+07	5.29031e+07	9.14618e+07	9.80977e+07	8.58888e+07	1.0667e+08	8.97216e+07	7.0911e+07	1.61575	Guanosine	283.259	637.2	283.092	16.7812	C10H13N5O5	[M]-	Purine nucleosides		C00387	Membrane transport; Nucleotide metabolism	118-00-3	HMDB0000133	Nodiff
M283T66_1.neg	3.52994e+07	1.21047e+07	0.342917	-1.54407	0.608452	0.883415	1.18893e+08	5.2695e+06	7.65679e+07	3.99692e+06	3.99718e+06	3.07225e+06	1.65189e+07	1.82712e+06	2.41166e+07	2.38092e+07	2.57154e+06	3.78511e+06	0.441424	Xanthosine	283.067	66.5	284.076	5.03061	C10H12N4O6	[M-H]-	Purine nucleosides		C01762	Membrane transport; Biosynthesis of other secondary metabolites; Nucleotide metabolism	146-80-5	HMDB0000299	Nodiff
M284T518.neg	2.39093e+08	1.3446e+08	0.562375	-0.830396	0.200264	0.731951	2.97177e+08	2.06829e+08	3.75879e+08	3.69377e+08	1.60101e+08	2.51933e+07	3.76906e+08	4.67537e+06	3.29695e+07	5.23654e+07	6.87662e+07	2.71076e+08	1.09192	Octadecanoic acid	284.267	518	284.272	15.1266	C18H36O2	[M]-	Fatty Acyls	Fatty acids and conjugates	C01530	Lipid metabolism	c("57-11-4", "646-29-7")	HMDB0000827	Nodiff
M284T578.pos	1.12698e+08	8.96962e+07	0.795896	-0.329348	0.180699	0.659529	1.28509e+08	9.72568e+07	1.16634e+08	7.42349e+07	1.10441e+08	1.49115e+08	1.28312e+08	1.0847e+08	4.91771e+07	7.26727e+07	7.22695e+07	1.07275e+08	1.22071	Octadecanamide	284.293	578.4	283.288	5.89532	C18H37NO	[M+H]+	Fatty Acyls	Fatty amides	C13846		124-26-5	HMDB0034146	Nodiff
M285T475.pos	8.81983e+06	7.25967e+06	0.823107	-0.280847	0.142964	0.613702	1.2293e+07	7.80556e+06	7.35653e+06	6.68814e+06	1.04045e+07	8.37124e+06	8.56323e+06	8.47834e+06	6.27291e+06	5.81e+06	7.52931e+06	6.90422e+06	1.30253	Biochanin A	285.204	474.7	284.068	1.69937	C16H12O5	[M+H]+	Isoflavonoids	O-methylated isoflavonoids	C00814		491-80-5	HMDB0002338	Nodiff
M285T532.pos	3.85833e+07	4.0636e+07	1.0532	0.0747802	0.656648	0.935074	8.19568e+07	4.41428e+07	1.46569e+07	4.7123e+07	2.1118e+07	2.25025e+07	6.23582e+07	5.55982e+07	2.59668e+07	2.19338e+07	2.99265e+07	4.80325e+07	0.400122	9-cis-Retinal	285.221	532.3	284.214	0.26646	C20H28O	[M+H]+	Prenol lipids	Retinoids	C16681	Metabolism of cofactors and vitamins	514-85-2	HMDB0006218	Nodiff
M286T421.pos	1.06094e+08	1.03858e+08	0.978924	-0.0307311	0.650065	0.93315	4.06093e+08	3.34474e+07	7.23248e+07	6.50598e+07	5.05624e+07	9.07502e+06	2.42835e+08	3.57174e+07	2.04735e+07	5.3679e+07	1.29183e+08	1.41258e+08	0.376842	Fisetin	286.274	421.2	286.048	3.24055	C15H10O6	[M]+			C10041		345909-34-4		Nodiff
M288T51_2.pos	7.226e+07	4.1309e+07	0.571672	-0.806741	0.582566	0.90845	1.86968e+08	1.46301e+08	1.93277e+07	6.55303e+07	1.16287e+07	3.80416e+06	2.5042e+07	4.20088e+06	1.04392e+08	9.15755e+06	9.48613e+06	9.55759e+07	0.438438	Indoleglycerol phosphate	288.075	51.4	287.056	0.391842	C11H14NO6P	[M+H]+			C03506	Amino acid metabolism	4220-97-7		Nodiff
M289T45_2.neg	2.2491e+06	1.24579e+06	0.553907	-0.852284	0.651936	0.898364	9.18756e+06	952560	1.4112e+06	1.23264e+06	643032	67611.1	3.0246e+06	12432.8	921484	527681	1.03057e+06	1.95799e+06	0.338382	Argininosuccinic acid	289.116	45	290.123	1.38353	C10H18N4O6	[M-H]-	Carboxylic acids and derivatives	Amino acids, peptides, and analogues	C03406	Amino acid metabolism	2387-71-5	HMDB0000052	Nodiff
M289T504.pos	4.15053e+06	5.03981e+06	1.21426	0.280074	0.795118	0.970018	1.07851e+06	6.52363e+06	5.74378e+06	2.56689e+06	3.55126e+06	5.43912e+06	650444	5.72543e+06	5.96717e+06	4.26209e+06	5.4676e+06	8.16613e+06	0.273616	Etiocholanedione	289.216	504	288.209	0.774507	C19H28O2	[M+H]+	Organic oxides	Androstane steroids	C03772	Lipid metabolism	1229-12-5	HMDB0003769	Nodiff
M289T53.neg	8.60868e+06	2.03359e+07	2.36226	1.24017	0.119897	0.695622	2.98526e+07	3.86491e+06	3.79628e+06	5.14999e+06	5.06536e+06	3.92293e+06	3.40708e+07	3.98566e+06	1.58542e+07	2.12111e+07	4.20889e+07	4.80475e+06	1.45505	Epiandrosterone	288.953	53	290.225	0.975961	C19H30O2	[M-H]-	Steroids and steroid derivatives	Androstane steroids	C07635		481-29-8	HMDB0000365	Nodiff
M291T386.pos	8.51395e+06	1.31122e+07	1.54009	0.623013	0.253122	0.723036	6.29182e+06	5.68815e+06	8.97203e+06	1.52313e+07	9.52677e+06	5.37359e+06	2.26409e+07	3.49694e+06	1.17332e+07	1.33469e+07	1.44883e+07	1.2967e+07	1.0309	Cyclopentolate	291.185	385.7	291.183	4.80794	C17H25NO3	[M]+	Benzene and substituted derivatives		C06932		512-15-2	HMDB0015114	Nodiff
M291T519.pos	4.44017e+06	4.91707e+06	1.10741	0.147185	0.995084	0.999306	1.07746e+07	878273	1.24524e+06	1.14008e+07	1.78373e+06	558329	8.00485e+06	562246	749765	777114	1.61557e+07	3.25276e+06	0.0410191	Etiocholanolone	291.232	518.6	290.225	0.60433	C19H30O2	[M+H]+	Steroids and steroid derivatives	Androstane steroids	C04373	Lipid metabolism	53-42-9	HMDB0000490	Nodiff
M293T499.pos	3.88843e+07	1.07992e+08	2.77726	1.47366	0.0325543	0.379964	1.24076e+08	2.32433e+06	4.92043e+06	8.62388e+06	1.53527e+07	7.80084e+07	6.37632e+07	1.33001e+08	7.05286e+07	8.88891e+07	1.98201e+08	9.35669e+07	1.84097	12-OPDA	293.211	498.7	292.204	0.111297	C18H28O3	[M+H]+			C01226	Lipid metabolism	67204-66-4 / 85551-10-6		Up
M293T508.pos	1.71183e+07	1.507e+07	0.880347	-0.183855	0.912507	0.988188	2.4763e+07	2.93436e+07	1.62021e+07	1.02193e+07	1.84779e+07	3.70386e+06	2.07361e+07	1.00613e+07	1.79859e+07	2.37192e+07	1.18593e+07	6.05836e+06	0.166872	13(S)-HpOTrE	293.212	508.2	310.214	15.7721	C18H30O4	[M+H-H2O]+			C04785	Lipid metabolism	67597-26-6		Nodiff
M293T513.neg	2.45988e+08	2.79185e+08	1.13495	0.182629	0.979006	0.995768	3.28941e+08	1.52038e+08	2.20672e+08	3.94537e+08	2.3864e+08	1.41102e+08	2.53997e+08	4.50868e+07	3.25497e+08	4.72387e+08	3.61993e+08	2.16148e+08	0.154051	9-OxoODE	293.212	513.3	294.219	1.42839	C18H30O3	[M-H]-	Fatty Acyls	Lineolic acids and derivatives	C14766	Lipid metabolism	54232-59-6	HMDB0004669	Nodiff
M295T229.pos	1.2953e+07	1.33166e+07	1.02807	0.0399427	0.915304	0.988188	1.39641e+06	3.71119e+07	1.10411e+06	3.61809e+07	972343	952159	855123	889281	3.91928e+07	930047	916005	3.71164e+07	0.00271394	Aspartame	295.129	229.3	294.122	0.30353	C14H18N2O5	[M+H]+	Carboxylic acids and derivatives	Amino acids, peptides, and analogues	C11045	Sensory system	22839-47-0	HMDB0001894	Nodiff
M295T415_2.pos	7.35958e+06	1.0228e+07	1.38976	0.474831	0.375771	0.8074	1.11758e+07	8.73758e+06	5.32964e+06	7.5357e+06	8.56576e+06	2.81298e+06	8.09479e+06	8.2744e+06	9.03587e+06	1.14459e+07	2.0907e+07	3.61009e+06	0.752066	(2'E,4'Z,8E)-Colneleic acid	295.221	414.5	294.219	12.5777	C18H30O3	[M+H]+	Fatty Acyls	Fatty acids and conjugates	C19827		52761-34-9	HMDB0030995	Nodiff
M295T452.pos	1.93484e+07	1.54311e+07	0.797541	-0.326369	0.561116	0.900334	1.89477e+07	3.39247e+07	1.42527e+07	2.88155e+07	1.26902e+07	7.45962e+06	1.16022e+07	1.40407e+07	1.25858e+07	1.49641e+07	2.88384e+07	1.05557e+07	0.495779	9,10-12,13-Diepoxyoctadecanoate	295.226	451.8	312.23	12.9868	C18H32O4	[M+H-H2O]+	Carboxylic acids and derivatives	Carbonyl compounds	C14836	Lipid metabolism			Nodiff
M295T47.pos	2.87929e+07	1.52741e+07	0.530482	-0.914623	0.533826	0.889977	9.85037e+07	1.51316e+07	1.88964e+07	2.7757e+07	8.94182e+06	3.52685e+06	3.12725e+07	2.09147e+06	1.04805e+07	1.05682e+07	1.59261e+07	2.13059e+07	0.530767	Indican	294.938	46.8	295.106	4.55274	C14H17NO6	[M]+			C08481		487-60-5		Nodiff
M295T471.pos	1.17265e+08	1.98401e+08	1.6919	0.758646	0.18381	0.662743	1.4734e+08	1.49748e+08	1.66366e+08	1.20593e+08	4.04889e+07	7.9053e+07	1.73682e+08	1.94148e+08	9.76204e+07	4.70723e+08	1.61463e+08	9.27689e+07	1.08786	13(S)-HOT	295.226	470.7	294.219	0.934875	C18H30O3	[M+H]+	Carboxylic acids and derivatives	Alcohols and polyols	C16316	Lipid metabolism	87984-82-5		Nodiff
M295T535.neg	5.4163e+08	7.88286e+08	1.4554	0.541411	0.0775315	0.65105	1.23382e+09	3.67825e+08	3.70355e+08	5.98798e+08	3.55809e+08	3.23169e+08	7.42222e+08	8.77991e+08	6.74345e+08	1.11896e+09	7.79247e+08	5.36947e+08	1.64965	Alpha-dimorphecolic acid	295.228	535.4	296.235	1.6936	C18H32O3	[M-H]-	Fatty Acyls	Lineolic acids and derivatives	C14767	Lipid metabolism; Endocrine system	73543-67-6	HMDB0004670	Nodiff
M295T538.pos	6.62187e+08	3.49074e+08	0.527153	-0.923707	0.0455642	0.423485	7.15953e+08	9.55042e+08	9.46667e+08	5.79195e+08	5.28175e+08	2.48092e+08	4.70173e+08	1.50254e+08	4.07624e+08	4.71385e+08	2.92261e+08	3.02748e+08	1.6322	13-L-Hydroperoxylinoleic acid	295.226	537.5	312.23	2.70978	C18H32O4	[M+H-H2O]+	Fatty Acyls	Lineolic acids and derivatives	C04717	Lipid metabolism	33964-75-9	HMDB0003871	Down
M295T548.pos	4.43813e+07	2.01095e+07	0.453108	-1.14207	0.0243893	0.351057	6.06644e+07	6.08719e+07	6.34231e+07	3.58907e+07	2.96387e+07	1.57991e+07	2.68155e+07	1.13404e+07	2.22443e+07	2.67043e+07	1.6638e+07	1.69147e+07	1.83426	9(S)-HPODE	295.226	548.4	312.23	2.70978	C18H32O4	[M+H-H2O]+	Fatty Acyls	Lineolic acids and derivatives	C14827	Lipid metabolism	29774-12-7	HMDB0006940	Down
M295T563_1.neg	2.2538e+06	1.28948e+06	0.572136	-0.80557	0.101403	0.676507	3.62701e+06	2.50694e+06	3.33565e+06	1.61793e+06	1.60829e+06	826972	1.67349e+06	887798	1.34242e+06	1.77564e+06	1.20372e+06	853809	1.40342	9,10-Epoxyoctadecenoic acid	295.219	563.1	296.235	28.5347	C18H32O3	[M-H]-	Fatty Acyls	Fatty acids and conjugates	C14825	Lipid metabolism		HMDB0004701	Nodiff
M296T105.pos	2.8164e+07	1.6566e+07	0.588198	-0.765626	0.298802	0.759312	5.30249e+07	2.51183e+07	4.77004e+07	1.006e+07	2.63264e+07	6.75405e+06	9.41685e+06	9.04983e+06	9.26536e+06	3.0196e+07	8.59335e+06	3.28746e+07	0.927822	Sumatriptan	296.135	104.5	295.135	10.7109	C14H21N3O2S	[M+H]+	Indoles and derivatives	Tryptamines and derivatives	C07319		103628-46-2	HMDB0005037	Nodiff
M297T554.pos	2.59597e+08	1.50118e+08	0.578272	-0.790181	0.0897084	0.525921	3.47996e+08	2.67706e+08	4.58142e+08	1.86311e+08	1.91404e+08	1.06026e+08	1.79768e+08	7.78178e+07	1.54491e+08	2.01205e+08	1.65426e+08	1.22e+08	1.46104	9,10-DHOME	297.243	554	314.246	0.258248	C18H34O4	[M+H-H2O]+	Fatty Acyls	Fatty acids and conjugates	C14828	Lipid metabolism	263399-34-4	HMDB0004704	Nodiff
M297T567.neg	3.32456e+08	1.91584e+08	0.576267	-0.795191	0.433678	0.830202	1.13283e+09	1.2722e+08	3.4928e+08	1.81462e+08	9.99624e+07	1.0398e+08	2.9966e+08	2.71273e+07	1.38661e+08	9.74187e+07	1.22772e+08	4.63863e+08	0.692964	Nonadecanoic acid	297.244	566.6	298.287	0.238521	C19H38O2	[M-H]-	Fatty Acyls	Fatty acids and conjugates	C16535		646-30-0	HMDB0000772	Nodiff
M298T652.pos	2.87105e+07	2.4091e+07	0.8391	-0.253086	0.580803	0.907258	6.44169e+07	1.86187e+07	2.6027e+07	2.85758e+07	2.31879e+07	1.14369e+07	3.49189e+07	2.9095e+06	2.34922e+07	2.5415e+07	2.82841e+07	2.95264e+07	0.454645	Tridemorph	298.31	652.2	297.303	0.0804531	C19H39NO	[M+H]+	Oxazinanes	Morpholines	C11285		c("24602-86-6", "81412-43-3", "NA")	HMDB0031810	Nodiff
M299T558.neg	1.53122e+07	1.51171e+07	0.987257	-0.0185018	0.984448	0.99674	2.71097e+07	1.41428e+07	1.36768e+07	1.24065e+07	1.49183e+07	9.6191e+06	1.83451e+07	8.58915e+06	1.3716e+07	2.13437e+07	1.72473e+07	1.14615e+07	0.0893715	all-trans-Retinoic acid	299.201	558.1	300.209	0.155525	C20H28O2	[M-H]-	Prenol lipids	Retinoids	C00777	Cancer: overview; Immune system; Metabolism of cofactors and vitamins; Cancer: specific types	302-79-4	HMDB0001852	Nodiff
M299T566.pos	2.0651e+07	1.54854e+07	0.749862	-0.415303	0.937001	0.991561	3.79182e+07	3.36933e+07	1.45885e+06	1.96291e+07	2.35072e+07	7.69916e+06	4.80154e+06	7.58234e+06	3.14354e+07	1.7023e+07	1.53896e+07	1.66804e+07	0.0192067	9,10-Dihydroxystearate	299.258	566.4	316.261	13.48	C18H36O4	[M+H-H2O]+			C19622				Nodiff
M300T443.pos	5.66815e+07	4.98701e+07	0.87983	-0.184703	0.324737	0.774669	2.42925e+08	2.12602e+07	1.69559e+07	2.16334e+07	2.08121e+07	1.65023e+07	6.35365e+07	2.84741e+07	3.47275e+07	4.68094e+07	6.65489e+07	5.91243e+07	0.883465	Sphingosine	300.291	442.9	299.282	0.817224	C18H37NO2	[M+H]+	Organonitrogen compounds	Amines	C00319	Lipid metabolism; Cell growth and death; Signal transduction	123-78-4	HMDB0000252	Nodiff
M300T611.pos	6.02469e+07	6.02562e+07	1.00015	0.000222145	0.840508	0.977786	2.96086e+07	1.8087e+06	1.09141e+08	1.87347e+06	8.40365e+07	1.35013e+08	1.38849e+07	1.0308e+08	1.87655e+06	1.36254e+08	9.27326e+07	1.37087e+07	0.116795	Palmitoylethanolamide	300.289	611.2	299.282	1.58514	C18H37NO2	[M+H]+	Carboximidic acids and derivatives	Carboximidic acids	C16512	Signaling molecules and interaction	544-31-0	HMDB0002100	Nodiff
M301T519.pos	2.70056e+07	2.2195e+07	0.82187	-0.283019	0.592819	0.913422	4.84859e+07	2.58451e+07	2.03113e+07	3.10582e+07	2.52247e+07	1.11082e+07	2.61299e+07	2.37997e+07	2.70213e+07	1.53916e+07	1.79524e+07	2.28753e+07	0.477895	9-cis-Retinoic acid	301.216	519.5	300.209	2.24424	C20H28O2	[M+H]+	Prenol lipids	Retinoids	C15493	Cancer: overview; Metabolism of cofactors and vitamins; Endocrine system; Cancer: specific types; Immune system	5300-03-08	HMDB0002369	Nodiff
M301T554.neg	3.85771e+06	3.69527e+06	0.957893	-0.0620636	0.621096	0.888799	1.11792e+07	1.82038e+06	2.68056e+06	3.64854e+06	2.71571e+06	1.10188e+06	6.23013e+06	4.42966e+06	3.58512e+06	2.36231e+06	3.1578e+06	2.40663e+06	0.518571	Quercetin	301.166	554.1	302.043	20.4304	C15H10O7	[M-H]-	Flavonoids	Flavones	C00389	Signal transduction	117-39-5	HMDB0005794	Nodiff
M302T452.pos	7.35958e+06	7.52059e+06	1.02188	0.0312219	0.871601	0.982403	3.51849e+06	2.1722e+07	1.85477e+06	1.27535e+07	1.67051e+06	2.63818e+06	5.71793e+06	2.86182e+06	1.73609e+07	1.97892e+06	1.66172e+06	1.55423e+07	0.209601	Sphinganine	302.305	452	301.298	0	C18H39NO2	[M+H]+	Organonitrogen compounds	Amines	C00836	Lipid metabolism; Signal transduction	764-22-7	HMDB0000269	Nodiff
M303T513.pos	3.73076e+07	1.61503e+07	0.432897	-1.20791	0.474327	0.859489	1.55184e+08	2.2302e+07	9.42716e+06	2.50948e+07	7.32813e+06	4.50897e+06	3.23647e+07	4.31114e+06	7.06708e+06	4.17892e+06	8.77948e+06	4.02006e+07	0.61251	19(R)-HETE	303.231	513	320.235	10.8469	C20H32O3	[M+H-H2O]+	Endogenous Metabolites		C14749	Lipid metabolism	115461-39-7		Nodiff
M303T523.pos	2.60965e+08	1.87068e+08	0.716834	-0.480288	0.358986	0.79396	4.65602e+08	2.33137e+08	4.01062e+08	1.69465e+08	1.82864e+08	1.13657e+08	2.21096e+08	1.03583e+08	2.16169e+08	1.66848e+08	1.98663e+08	2.16052e+08	0.84158	16(R)-HETE	303.231	523.4	320.235	4.94673	C20H32O3	[M+H-H2O]+	Fatty Acyls	Eicosanoids	C14778	Lipid metabolism	183509-22-0	HMDB0004680	Nodiff
M303T532.pos	6.42023e+08	5.06387e+08	0.788737	-0.342385	0.870169	0.982356	2.09281e+09	3.35988e+08	3.61627e+08	4.86522e+08	3.94908e+08	1.80291e+08	8.72805e+08	1.67458e+08	1.88045e+08	4.71483e+08	7.8008e+08	5.58453e+08	0.147034	8-HETE	303.231	532.3	320.235	4.28716	C20H32O3	[M+H-H2O]+	Fatty Acyls	Eicosanoids	C14776	Lipid metabolism; Endocrine system	98462-03-4	HMDB0004679	Nodiff
M304T650.neg	5.38319e+07	1.60963e+07	0.29901	-1.74174	0.160895	0.713103	1.87491e+08	3.79031e+07	4.1244e+07	3.12191e+07	2.01772e+07	4.95664e+06	2.97369e+07	799310	1.60563e+07	8.4062e+06	1.36181e+07	2.79607e+07	1.18612	Arachidonic acid	304.237	649.5	304.24	11.8329	C20H32O2	[M]-	Fatty Acyls	Fatty acids and conjugates	C00219	Circulatory system; Cell growth and death; Nervous system; Sensory system; Endocrine system; Lipid metabolism; Immune system; Infectious disease: parasitic	506-32-1	HMDB0001043	Nodiff
M306T466.pos	1.01882e+07	1.13325e+07	1.11231	0.153555	0.831605	0.976142	6.02745e+06	3.58907e+06	1.44432e+07	8.0241e+06	1.89888e+07	1.00568e+07	1.1152e+07	9.95546e+06	4.11345e+06	2.61882e+07	6.04824e+06	1.05375e+07	0.159612	8,11,14-Eicosatrienoic acid	306.243	466.3	306.256	26.2565	C20H34O2	[M]+	Fatty Acyls	Fatty acids and conjugates	C03242	Lipid metabolism	1783-84-2	HMDB0002925	Nodiff
M308T535.pos	1.02116e+07	1.33694e+07	1.30924	0.38873	0.307795	0.766467	4.59559e+06	4.29257e+06	2.50098e+07	8.63014e+06	4.30316e+06	1.44381e+07	8.16438e+06	2.94133e+07	8.47744e+06	1.3259e+07	1.27274e+07	8.1747e+06	0.849494	Eicosadienoic acid	308.279	535.1	308.272	25.3024	C20H36O2	[M]+	Carboxylic acids and derivatives	Carbonyl compounds	C16525	Lipid metabolism	2091-39-6/5598-38-9	HMDB0005060	Nodiff
M309T396.pos	1.79177e+07	1.15785e+07	0.646201	-0.629944	0.237175	0.711747	1.90287e+07	2.17306e+07	2.86463e+07	2.28472e+07	9.11407e+06	6.13958e+06	9.85889e+06	7.19422e+06	9.10027e+06	1.28915e+07	2.07876e+07	9.63828e+06	1.02772	2,3-Dinor-8-iso prostaglandin F2alpha	309.205	395.8	326.209	1.10809	C18H30O5	[M+H-H2O]+			C14794	Lipid metabolism	221664-05-7		Nodiff
M309T452.neg	1.0136e+07	1.38666e+07	1.36806	0.45213	0.393573	0.816823	3.81622e+06	9.44926e+06	1.54313e+07	1.37432e+06	1.95031e+07	1.12416e+07	1.99144e+07	2.05604e+07	2.7126e+06	1.24802e+07	1.53711e+07	1.21608e+07	0.690911	Ribose 1,5-bisphosphate	309.174	451.7	309.986	1.40148	C5H12O11P2	[M-H]-	Organooxygen compounds	Carbohydrates and carbohydrate conjugates	C01151	Carbohydrate metabolism; Metabolism of other amino acids	14689-84-0	HMDB0011688	Nodiff
M309T586_1.pos	1.79809e+06	5.39809e+06	3.00212	1.58598	0.0217067	0.348074	2.63318e+06	1.48392e+06	1.70389e+06	3.16447e+06	1.12267e+06	680415	8.87755e+06	7.07959e+06	4.68364e+06	7.70011e+06	1.32791e+06	2.71975e+06	1.77362	Nadolol	309.196	586.3	309.194	0.0739064	C17H27NO4	[M]+			C07249		42200-33-9		Up
M310T51_2.neg	1.22195e+07	1.59559e+07	1.30577	0.384903	0.086085	0.660133	1.12563e+07	9.48328e+06	1.00781e+07	1.42521e+07	1.07048e+07	1.75425e+07	2.03359e+07	1.5448e+07	1.64061e+07	1.42655e+07	1.91665e+07	1.01134e+07	1.5048	trans-Cinnamoyl beta-D-glucoside	310.114	50.9	310.105	28.3775	C15H18O7	[M]-	Benzene and substituted derivatives	Alcohols and polyols	C04164				Nodiff
M310T52.pos	5.16588e+07	5.0502e+07	0.977606	-0.0326745	0.512927	0.881836	7.75149e+07	4.86642e+07	7.69548e+07	3.86502e+07	4.21634e+07	2.60052e+07	1.46442e+08	3.05322e+07	2.62595e+07	1.34068e+07	2.91279e+07	5.72433e+07	0.653338	N-Acetylneuraminic acid	310.113	51.7	309.106	0.00456613	C11H19NO9	[M+H]+	Organooxygen compounds	Carbohydrates and carbohydrate conjugates	C19910		131-48-6	HMDB0000230	Nodiff
M310T540.pos	6.76551e+07	2.91011e+07	0.430139	-1.21712	0.400675	0.819623	2.26796e+08	1.8857e+07	3.11573e+07	8.71586e+07	3.09446e+07	1.10168e+07	6.41576e+07	1.53682e+07	1.74298e+07	1.8726e+07	3.13921e+07	2.75329e+07	0.735906	N,N-Dimethylsphing-4-enine	310.31	540.3	327.314	12.3554	C20H41NO2	[M+H-H2O]+	Organonitrogen compounds	Amines	C13914		c("122314-67-4", "119567-63-4")	HMDB0013645	Nodiff
M311T340.neg	5.87189e+06	5.70844e+06	0.972163	-0.0407299	0.962406	0.991968	2.48755e+06	2.83413e+06	6.45995e+06	1.22647e+07	4.11822e+06	7.06682e+06	4.49846e+06	2.40652e+06	3.21176e+06	9.0554e+06	7.3879e+06	7.69058e+06	0.178752	9,10,13-TriHOME	311.222	340.5	330.241	0.996073	C18H34O5	[M-H2O-H]-	Carboxylic acids and derivatives	Alcohols and polyols	C14835	Lipid metabolism	29907-57-1	HMDB0004710	Nodiff
M311T344.pos	4.85076e+06	7.79026e+06	1.60599	0.683462	0.102577	0.552159	9.31008e+06	1.39665e+06	6.38089e+06	6.43019e+06	3.82123e+06	1.76552e+06	1.04521e+07	6.42024e+06	1.16623e+07	7.37362e+06	5.36496e+06	5.46836e+06	1.40169	2,3-Dinor-8-iso prostaglandin F1alpha	311.221	343.7	328.225	11.6767	C18H32O5	[M+H-H2O]+	Carboxylic acids and derivatives	Alcohols and polyols	C14795	Lipid metabolism			Nodiff
M311T690.neg	1.18276e+07	6.52756e+06	0.551891	-0.857544	0.711428	0.915635	1.22373e+07	3.00173e+07	2.31736e+07	897840	789637	3.8499e+06	1.14177e+06	1.06483e+07	1.46273e+07	9.71138e+06	1.03272e+06	2.00384e+06	0.452203	Arachidic acid	311.296	689.5	312.303	1.50266	C20H40O2	[M-H]-	Fatty Acyls	Fatty acids and conjugates	C06425	Lipid metabolism	506-30-9	HMDB0002212	Nodiff
M312T521.pos	2.00125e+07	1.03107e+07	0.515211	-0.956764	0.53553	0.890902	7.99246e+07	7.54675e+06	1.11865e+07	1.21743e+07	8.29255e+06	950297	2.19106e+07	46667.4	8.66873e+06	7.41907e+06	1.11793e+07	1.26396e+07	0.520064	Aflatoxin B1	312.363	521.1	312.063	0.0315764	C17H12O6	[M]+	Coumarins and derivatives	Furanocoumarins	C06800	Xenobiotics biodegradation and metabolism; Cancer: specific types	1162-65-8	HMDB0006552	Nodiff
M313T378.neg	8.67346e+06	1.18643e+07	1.36789	0.451948	0.0574473	0.643426	1.23046e+07	5.43583e+06	1.06573e+07	8.06479e+06	9.84677e+06	5.73152e+06	1.0603e+07	1.21769e+07	1.00948e+07	1.37499e+07	1.48422e+07	9.71909e+06	1.78622	12,13-DHOME	313.238	378.4	314.246	0.242627	C18H34O4	[M-H]-	Fatty Acyls	Fatty acids and conjugates	C14829	Lipid metabolism		HMDB0004705	Nodiff
M313T529.pos	6.01158e+06	7.81627e+06	1.3002	0.378735	0.230413	0.704834	1.53515e+07	1.42915e+06	1.2989e+06	2.26606e+06	9.2e+06	6.52391e+06	6.76037e+06	7.07581e+06	3.69849e+06	6.27454e+06	1.26809e+07	1.04075e+07	1.07596	9,12,13-TriHOME	313.237	529.2	330.241	13.1978	C18H34O5	[M+H-H2O]+	Carboxylic acids and derivatives	Alcohols and polyols	C14833	Lipid metabolism	97134-11-7	HMDB0004708	Nodiff
M316T379.pos	8.22234e+06	6.09194e+06	0.740901	-0.432646	0.957333	0.992327	645866	497623	1.25101e+07	1.14805e+06	1.18545e+07	2.26779e+07	873636	1.19816e+07	2.17865e+06	9.42082e+06	1.17339e+07	363058	0.0849758	Decanoyl-L-carnitine	316.248	378.5	315.241	0.00146583	C17H33NO4	[M+H]+			C03299		3992-45-8	HMDB00651	Nodiff
M317T505.pos	1.33949e+07	1.58538e+07	1.18357	0.243151	0.0754682	0.500549	1.39803e+07	1.12614e+07	1.21046e+07	1.45653e+07	1.32143e+07	1.52432e+07	2.06907e+07	1.38119e+07	1.3149e+07	1.52939e+07	1.68999e+07	1.52776e+07	1.4708	Delta-12-Prostaglandin J2	317.21	504.8	334.214	10.1951	C20H30O4	[M+H-H2O]+	Fatty Acyls	Eicosanoids	C05958	Lipid metabolism	87893-54-7	HMDB0004238	Nodiff
M317T509.neg	1.48579e+07	1.59667e+07	1.07463	0.103836	0.406473	0.819897	2.21165e+07	2.22067e+07	2.72443e+07	265212	354629	1.69603e+07	2.21324e+07	1.91097e+07	2.20737e+07	8.70671e+06	2.19793e+06	2.158e+07	0.592466	15-KETE	317.212	508.6	318.219	0.689823	C20H30O3	[M-H]-	Fatty Acyls	Fatty acids and conjugates	C04577	Lipid metabolism	81416-72-0	HMDB0010210	Nodiff
M317T529.pos	7.75955e+07	1.01343e+08	1.30604	0.385201	0.80645	0.970085	3.38956e+07	1.38783e+08	9.56719e+07	6.46028e+07	1.0526e+08	2.73595e+07	1.00164e+08	3.98142e+07	1.35211e+08	5.4272e+07	2.20354e+07	2.56561e+08	0.225192	12-Keto-leukotriene B4	317.209	528.7	334.214	7.04267	C20H30O4	[M+H-H2O]+	Fatty Acyls	Eicosanoids	C05949	Lipid metabolism	136696-10-1	HMDB0004234	Nodiff
M317T538.pos	1.75512e+08	1.35782e+08	0.773631	-0.370283	0.931361	0.990665	3.29612e+08	1.95428e+08	6.0163e+07	2.32193e+08	2.14433e+08	2.12454e+07	1.92026e+08	1.44388e+08	1.61091e+08	3.55928e+07	1.36126e+08	1.45467e+08	0.0716971	15-Deoxy-d-12,14-PGJ2	317.209	537.5	316.204	5.91408	C20H28O3	[M+H]+	Fatty Acyls	Eicosanoids	C14717	Lipid metabolism	87893-55-8	HMDB0005079	Nodiff
M318T529.pos	1.2712e+07	1.97644e+07	1.55479	0.63672	0.737793	0.955548	1.142e+06	943637	2.56741e+07	2.2882e+06	2.48714e+07	2.13525e+07	1.74851e+06	2.58548e+07	4.27075e+06	5.2167e+07	3.38132e+07	732277	0.260028	Nateglinide	318.212	528.7	317.199	17.0453	C19H27NO3	[M+H]+	Carboxylic acids and derivatives	Amino acids, peptides, and analogues	C12508		105816-04-4	HMDB0014869	Nodiff
M319T412.pos	8.70001e+07	3.78569e+07	0.435136	-1.20046	0.628132	0.925416	3.75507e+08	4.87546e+07	3.51052e+07	2.14579e+07	2.1185e+07	1.99915e+07	7.37815e+07	5.94443e+07	2.94069e+07	2.5573e+07	1.63823e+07	2.25534e+07	0.498863	5(S)-HpETE	319.226	411.9	336.23	0.923904	C20H32O4	[M+H-H2O]+			C05356	Lipid metabolism; Nervous system; Endocrine system	71774-08-8		Nodiff
M319T434.pos	3.06736e+07	2.29961e+07	0.749704	-0.415608	0.331225	0.779676	6.01056e+07	2.02175e+07	2.29131e+07	3.94053e+07	2.17267e+07	1.96732e+07	2.84029e+07	1.33202e+07	3.29598e+07	2.25012e+07	2.21813e+07	1.86111e+07	0.803633	9(S)-HPETE	319.227	433.6	336.23	12.3237	C20H32O4	[M+H-H2O]+	Carboxylic acids and derivatives	Alkyl hydroperoxides	C14821	Lipid metabolism; Nervous system			Nodiff
M319T499.pos	5.32666e+07	5.73796e+07	1.07722	0.107309	0.698387	0.9464	4.50697e+07	6.53757e+07	3.85806e+07	3.28678e+07	9.10174e+07	4.66882e+07	5.97968e+07	4.44082e+07	3.41192e+07	4.8981e+07	6.18809e+07	9.50918e+07	0.329863	12-KETE	319.226	499.3	318.219	1.49111	C20H30O3	[M+H]+	Fatty Acyls	Fatty acids and conjugates	C14807	Lipid metabolism	108437-64-5	HMDB0013633	Nodiff
M319T524_2.pos	6.48424e+06	6.14467e+06	0.94763	-0.0776036	0.763763	0.962114	6.76396e+06	863577	3.74932e+06	1.84988e+06	7.89358e+06	1.77851e+07	7.68303e+06	7.86577e+06	1.81323e+06	9.10547e+06	8.56204e+06	1.83845e+06	0.221003	Prostaglandin B1	319.23	523.6	336.23	22.974	C20H32O4	[M+H-H2O]+	Fatty Acyls	Eicosanoids	C00959		13345-51-2	HMDB0002982	Nodiff
M319T555.pos	4.98456e+07	2.10349e+07	0.422002	-1.24468	0.078289	0.50461	5.85523e+07	9.68932e+07	1.03293e+07	4.94492e+07	6.043e+07	2.34197e+07	3.85322e+07	1.78524e+07	8.7848e+06	3.61929e+06	4.95884e+06	5.24621e+07	1.44874	5-KETE	319.226	555	318.219	3.37066	C20H30O3	[M+H]+	Fatty Acyls	Fatty acids and conjugates	C14732	Lipid metabolism	126432-17-5/106154-18-1	HMDB0010217	Nodiff
M320T499.pos	4.89959e+07	1.31934e+07	0.269275	-1.89285	0.113001	0.570377	6.65433e+07	9.97403e+07	8.77377e+07	1.88149e+07	1.50109e+07	6.12847e+06	1.4961e+07	9.29771e+06	1.10563e+07	1.40043e+07	1.41957e+07	1.56454e+07	1.46208	20-HETE	320.228	499.4	320.235	23.7326	C20H32O3	[M]+	Carboxylic acids and derivatives	Alcohols and polyols	C14748	Lipid metabolism; Circulatory system	79551-86-3	HMDB0005998	Nodiff
M321T502.pos	1.16023e+07	1.22116e+07	1.05251	0.0738392	0.627509	0.925416	8.4656e+06	1.58735e+07	1.00178e+07	1.10163e+07	1.28113e+07	1.14295e+07	9.25621e+06	1.20781e+07	1.59637e+07	1.13445e+07	1.3044e+07	1.15832e+07	0.465986	5,6-DHET	321.241	502.3	338.246	10.0672	C20H34O4	[M+H-H2O]+	Fatty Acyls	Eicosanoids	C14772	Lipid metabolism; Nervous system	213382-49-1	HMDB0002343	Nodiff
M321T523.pos	1.4904e+07	1.21634e+07	0.816118	-0.293151	0.780237	0.967162	3.0078e+07	1.36049e+07	2.09905e+07	1.13319e+07	1.09957e+07	2.42271e+06	1.31273e+07	2.29139e+06	1.83489e+07	1.39675e+07	1.57718e+07	9.47348e+06	0.248036	8,9-EET	321.242	523.2	320.235	1.48175	C20H32O3	[M+H]+	Fatty Acyls	Fatty acids and conjugates	C14769	Circulatory system; Nervous system; Sensory system; Endocrine system; Lipid metabolism	81246-85-7 / NA	HMDB0002232	Nodiff
M321T562.pos	1.91148e+07	2.77045e+07	1.44938	0.535434	0.237195	0.711747	2.86431e+07	1.25592e+07	1.47345e+07	1.87157e+07	7.07434e+06	3.29618e+07	1.58319e+07	3.16347e+07	1.41525e+07	3.88042e+07	4.73656e+07	1.84383e+07	1.03669	8,9-DiHETrE	321.242	561.7	338.246	11.9349	C20H34O4	[M+H-H2O]+	Fatty Acyls	Eicosanoids	C14773	Lipid metabolism; Nervous system	192461-96-4	HMDB0002311	Nodiff
M323T569.pos	3.44985e+07	3.8144e+07	1.10567	0.144923	0.485869	0.868263	4.934e+07	4.82129e+07	3.05432e+07	3.86225e+07	1.96216e+07	2.06509e+07	4.19856e+07	2.86936e+07	3.57452e+07	5.32962e+07	4.09018e+07	2.82416e+07	0.611228	CMP	323.258	569.5	323.052	26.9409	C9H14N3O8P	[M]+	Pyrimidine nucleotides	Pyrimidine ribonucleotides	C00055	Nucleotide metabolism	63-37-6	HMDB0000095	Nodiff
M324T46.neg	4.99869e+06	5.86606e+06	1.17352	0.230843	0.951318	0.989853	9.23738e+06	4.44727e+06	6.14087e+06	7.4128e+06	2.49345e+06	260362	9.62498e+06	227205	3.7149e+06	9.42049e+06	1.00765e+07	2.13231e+06	0.19786	N-Glycolylneuraminic acid	324.094	46.4	325.101	0.0611181	C11H19NO10	[M-H]-	Organooxygen compounds	Carbohydrates and carbohydrate conjugates	C03410	Carbohydrate metabolism	1113-83-3	HMDB0000833	Nodiff
M325T657.neg	9.5027e+07	7.65933e+07	0.806016	-0.311119	0.544308	0.861928	2.16726e+08	3.33948e+07	1.30223e+08	6.68883e+07	9.06802e+07	3.22504e+07	1.51119e+08	8.15095e+06	6.21384e+07	1.42984e+08	5.05878e+07	4.458e+07	0.442384	11-Dehydrocorticosterone	325.184	657.5	344.199	10.7324	C21H28O4	[M-H2O-H]-	Steroids and steroid derivatives	Hydroxysteroids	C05490	Lipid metabolism	72-23-1	HMDB0004029	Nodiff
M326T604_1.pos	2.89906e+08	3.93766e+08	1.35826	0.441754	0.199906	0.676245	7.58559e+07	3.51703e+08	3.83337e+08	3.12888e+08	3.83822e+08	2.31828e+08	2.99306e+08	5.10714e+08	2.93188e+08	4.98109e+08	4.66046e+08	2.95231e+08	1.09894	Oleoylethanolamide	326.305	604.4	325.298	2.37815	C20H39NO2	[M+H]+	Organonitrogen compounds	Amines	C20792	Signal transduction	111-58-0	HMDB0002088	Nodiff
M327T514_1.pos	1.04079e+07	3.84726e+06	0.369647	-1.43578	0.138027	0.606568	2.38925e+07	1.53356e+07	1.23129e+07	3.42425e+06	6.68424e+06	798070	3.44426e+06	951046	2.96999e+06	1.19745e+06	793204	1.37276e+07	1.26125	Triphenyl phosphate	327.077	514.2	326.071	1.30939	C18H15O4P	[M+H]+			C14235		115-86-6		Nodiff
M327T516.pos	7.13872e+06	4.71445e+06	0.660406	-0.598576	0.659965	0.937161	1.59066e+07	2.07146e+06	892213	4.39883e+06	1.94762e+07	87055.8	1.76978e+06	8.46963e+06	3.09418e+06	132380	94837.9	1.47259e+07	0.384649	Formoterol	327.159	515.9	344.174	22.5151	C19H24N2O4	[M+H-H2O]+	Benzene and substituted derivatives	Phenethylamines	C07805		73573-87-2	HMDB0015118	Nodiff
M329T253.pos	2.12423e+06	520860	0.2452	-2.02797	0.130295	0.597763	5.58344e+06	1.67043e+06	3.02715e+06	1.96265e+06	271575	230098	962027	229666	301553	852236	380643	399032	1.33282	(S)-Reticuline	329.149	253.4	329.163	1.07255	C19H23NO4	[M]+	Isoquinolines and derivatives	Benzylisoquinolines	C02105		485-19-8	HMDB0003601	Nodiff
M329T549.pos	2.79571e+06	1.64016e+06	0.58667	-0.769378	0.0346059	0.388516	2.55342e+06	2.71062e+06	3.4094e+06	2.80242e+06	2.6573e+06	2.6411e+06	3.4366e+06	1.80415e+06	1.73424e+06	1.32288e+06	767128	775947	1.89465	Docosahexaenoic acid	329.248	549	328.24	1.51861	C22H32O2	[M+H]+	Fatty Acyls	Fatty acids and conjugates	C06429	Lipid metabolism	6217-54-5	HMDB0002183	Down
M329T613_2.neg	4.50502e+09	2.75497e+09	0.611534	-0.709496	0.474622	0.845851	2.66432e+09	2.07944e+09	2.61961e+09	1.22679e+09	1.05632e+10	7.87681e+09	3.63786e+09	1.70076e+09	1.7986e+09	1.54785e+09	4.38355e+09	3.46122e+09	0.700537	Docosapentaenoic acid (22n-3)	329.248	612.9	330.256	1.21489	C22H34O2	[M-H]-	Fatty Acyls	Fatty acids and conjugates	C16513	Lipid metabolism	24880-45-3	HMDB0006528	Nodiff
M331T602.pos	2.92208e+06	2.16757e+06	0.741787	-0.430922	0.539362	0.892149	4.91191e+06	1.09507e+06	4.00835e+06	989878	1.25107e+06	5.27623e+06	1.31057e+06	2.9416e+06	674124	1.30881e+06	1.45e+06	5.32029e+06	0.559815	Ethyl icosapentate	331.262	602.5	330.256	2.04068	C22H34O2	[M+H]+	Fatty Acyls	Fatty acid esters	C16184		86227-47-6/NA	HMDB0039530	Nodiff
M331T645.neg	2.69599e+09	2.58423e+09	0.958547	-0.0610786	0.750572	0.930942	6.71907e+09	2.82145e+09	8.53263e+08	1.10371e+09	4.52164e+09	1.56807e+08	5.21748e+09	6.58723e+07	5.93825e+08	5.96674e+08	2.87979e+09	6.15176e+09	0.24435	Adrenic acid	331.264	644.5	332.272	0.978072	C22H36O2	[M-H]-	Fatty Acyls	Fatty acids and conjugates	C16527	Lipid metabolism; Cell growth and death	28874-58-0	HMDB0002226	Nodiff
M333T469.neg	3.10039e+06	1.76957e+06	0.570756	-0.809054	0.874293	0.971786	1.36029e+07	721392	1.58248e+06	1.41131e+06	1.13675e+06	147490	3.41425e+06	265952	1.08481e+06	2.05052e+06	2.00834e+06	1.79351e+06	0.257769	Lipoxin B4	333.207	468.7	352.225	0.0300114	C20H32O5	[M-H2O-H]-	Fatty Acyls	Eicosanoids	C06315	Lipid metabolism	98049-69-5/92950-25-9	HMDB0005082	Nodiff
M333T520.pos	2.81875e+07	9.18008e+06	0.325679	-1.61848	0.155781	0.628146	1.32725e+07	8.9613e+07	9.51385e+06	1.04661e+07	3.91913e+07	7.06839e+06	9.35584e+06	9.65014e+06	9.66919e+06	7.88349e+06	7.97953e+06	1.05423e+07	1.30413	15-Keto-prostaglandin E2	333.203	520.2	350.209	4.3037	C20H30O5	[M+H-H2O]+	Carboxylic acids and derivatives	Acryloyl compounds	C04707		26441-05-4	HMDB0003175	Nodiff
M334T398.pos	2.10928e+06	1.6057e+06	0.761253	-0.393552	0.398003	0.818913	899535	1.29246e+06	1.79619e+06	3.24542e+06	2.92428e+06	2.49781e+06	1.33265e+06	1.1998e+06	1.72922e+06	2.21368e+06	1.13438e+06	2.02445e+06	0.665038	Nicotinamide ribotide	334.295	397.6	334.057	1.17233	C11H15N2O8P	[M]+	Pyridine nucleotides	Nicotinamide nucleotides	C00455	Metabolism of cofactors and vitamins	1094-61-7	HMDB0000229	Nodiff
M335T375.pos	1.41175e+08	6.24307e+07	0.44222	-1.17716	0.134704	0.60388	1.19372e+08	2.10815e+08	2.21223e+08	1.82918e+08	9.26507e+07	2.00736e+07	1.11879e+08	4.94872e+06	4.33618e+07	1.2639e+08	2.05641e+07	6.74406e+07	1.25814	Prostaglandin F3a	335.221	374.5	352.225	0.486611	C20H32O5	[M+H-H2O]+	Fatty Acyls	Eicosanoids	C06476		745-64-2	HMDB0002122	Nodiff
M335T437.neg	3.49953e+07	3.66393e+07	1.04698	0.0662274	0.587429	0.879742	3.3854e+07	9.21238e+07	2.22445e+07	2.72917e+07	1.74146e+07	1.70434e+07	1.37974e+07	4.43764e+07	4.12128e+07	3.88534e+07	4.24455e+07	3.91501e+07	0.462136	(5Z,9E,14Z)-(8xi,11xi,12S)-8,11,12-Trihydroxyicosa-5,9,14-trienoate	335.221	436.8	354.241	3.01293	C20H34O5	[M-H2O-H]-	Carboxylic acids and derivatives	Alcohols and polyols	C04843				Nodiff
M335T439.pos	2.02477e+07	2.26694e+07	1.1196	0.16299	0.280951	0.742813	1.1445e+07	1.24535e+07	1.3495e+07	1.35857e+07	1.57601e+07	5.47468e+07	2.73539e+07	2.32945e+07	2.32625e+07	2.06079e+07	2.20134e+07	1.94843e+07	0.975384	13,14-Dihydro-15-keto-PGE2	335.223	439.2	352.225	1.28879	C20H32O5	[M+H-H2O]+	Fatty Acyls	Eicosanoids	C04671		363-23-5	HMDB0002776	Nodiff
M335T453.neg	5.74379e+07	1.9025e+08	3.31227	1.72782	0.0053902	0.615984	8.53578e+07	5.43795e+07	2.63547e+07	5.11026e+07	9.40195e+07	3.34134e+07	2.20956e+08	1.55898e+08	6.08589e+07	3.73977e+08	2.05009e+08	1.248e+08	2.20879	(5Z,9E,14Z)-(8xi,11R,12S)-11,12-epoxy-8-hydroxyicosa-5,9,14-trienoic Acid	335.222	453.3	336.23	2.38648	C20H32O4	[M-H]-	Fatty Acyls	Eicosanoids	C04849			HMDB0062619	Up
M335T461.pos	4.63363e+07	3.82504e+07	0.825496	-0.276667	0.248073	0.719993	4.30025e+07	6.60893e+07	6.15807e+07	3.92309e+07	3.32172e+07	3.48969e+07	3.85969e+07	3.46891e+07	4.01186e+07	4.01762e+07	3.81078e+07	3.78138e+07	1.09404	Prostaglandin-c2	335.221	461.5	334.214	2.30373	C20H30O4	[M+H]+	Fatty Acyls	Eicosanoids	C05955	Lipid metabolism; Nervous system	49825-91-4	HMDB0060095	Nodiff
M335T480.pos	1.12224e+08	1.57445e+07	0.140295	-2.83346	0.00924318	0.318354	1.01566e+08	2.10515e+08	2.34667e+08	1.68099e+07	8.75674e+07	2.22194e+07	7.79645e+06	3.75991e+06	4.37403e+07	1.04779e+07	2.22199e+07	6.47268e+06	1.99971	Prostaglandin B2	335.22	479.6	334.214	6.19296	C20H30O4	[M+H]+	Fatty Acyls	Eicosanoids	C05954	Lipid metabolism; Nervous system	13367-85-6	HMDB0004236	Down
M335T621_2.pos	1.31922e+07	2.28674e+06	0.17334	-2.52832	0.0248442	0.352935	2.03994e+07	2.56003e+07	2.40483e+07	2.4063e+06	4.18557e+06	2.51345e+06	1.55959e+06	1.07281e+06	6.14457e+06	1.51926e+06	2.21779e+06	1.20641e+06	1.85088	Prostaglandin E2	335.219	621	352.225	4.87442	C20H32O5	[M+H-H2O]+	Fatty Acyls	Eicosanoids	C00584	Cancer: overview; Nervous system; Signal transduction; Sensory system; Endocrine system; Digestive system; Lipid metabolism; Signaling molecules and interaction; Immune disease; Immune system; Infectious disease: parasitic; Infectious disease: viral	363-24-6	HMDB0001220	Down
M336T291_1.pos	1.9319e+07	5.3109e+06	0.274905	-1.863	0.00245075	0.304568	3.09787e+07	2.24275e+07	2.86604e+07	1.33155e+07	1.40385e+07	6.49362e+06	7.44156e+06	3.40178e+06	6.40192e+06	4.47042e+06	2.5198e+06	7.6299e+06	2.19534	Isopentenyl adenosine	336.166	291.1	335.159	1.02968	C15H21N5O4	[M+H]+			C16427		7724-76-7		Down
M336T594.pos	6.53918e+07	6.36083e+07	0.972726	-0.0398953	0.720996	0.952752	6.67055e+07	6.53748e+07	7.20274e+07	6.42174e+07	4.21906e+07	8.18352e+07	3.42362e+07	3.71133e+07	7.43763e+07	7.34826e+07	8.17247e+07	8.07167e+07	0.22601	12-Keto-tetrahydro-leukotriene B4	336.311	593.5	336.23	2.33274	C20H32O4	[M]+	Fatty Acyls	Eicosanoids	C02165	Sensory system; Nervous system; Digestive system; Endocrine system; Lipid metabolism; Signaling molecules and interaction	71160-24-2	HMDB0002995	Nodiff
M337T402.pos	6.41587e+06	5.47198e+06	0.852881	-0.229583	0.587914	0.910906	3.29796e+06	5.45563e+06	4.5741e+06	8.54843e+06	9.72181e+06	6.89731e+06	5.33531e+06	4.96102e+06	6.13504e+06	5.85797e+06	4.91201e+06	5.63051e+06	0.423447	11H-14,15-EETA	337.237	402	336.23	2.00452	C20H32O4	[M+H]+	Carboxylic acids and derivatives	Alcohols and polyols	C14813	Lipid metabolism	219535-29-2	HMDB0004693	Nodiff
M337T412.pos	4.37239e+07	3.31574e+07	0.758336	-0.399092	0.188221	0.667222	3.03288e+07	3.46337e+07	6.08859e+07	3.0571e+07	6.85031e+07	3.7421e+07	3.03702e+07	3.05644e+07	4.06045e+07	2.77442e+07	3.17382e+07	3.79228e+07	1.18605	Prostaglandin F2a	337.237	411.9	354.241	10.4793	C20H34O5	[M+H-H2O]+	Fatty Acyls	Eicosanoids	C00639	Nervous system; Signal transduction; Digestive system; Endocrine system; Lipid metabolism; Signaling molecules and interaction	551-11-1	HMDB0001139	Nodiff
M337T45_1.pos	1.67111e+07	1.85946e+07	1.11271	0.154075	0.949364	0.992065	2.76121e+07	2.84403e+07	3.2738e+06	3.8089e+07	1.87654e+06	975172	1.3491e+07	525455	4.58919e+07	4.55835e+06	4.07498e+06	4.30261e+07	0.128786	Kyotorphin	337.171	45.3	337.175	0.994092	C15H23N5O4	[M]+	Carboxylic acids and derivatives	Amino acids, peptides, and analogues	C02993		70904-56-2	HMDB0005768	Nodiff
M337T500.pos	1.18489e+07	7.24101e+06	0.61111	-0.710495	0.335964	0.781849	2.37124e+07	1.21671e+07	1.72342e+07	1.07286e+07	3.67566e+06	3.57571e+06	1.65968e+07	4.46606e+06	5.27284e+06	7.47178e+06	4.35754e+06	5.28106e+06	0.895419	Prostaglandin E1	337.238	499.8	354.241	1.24625	C20H34O5	[M+H-H2O]+	Fatty Acyls	Eicosanoids	C04741		745-65-3	HMDB0001442	Nodiff
M338T612_1.pos	1.15048e+10	1.55536e+10	1.35192	0.435013	0.0658985	0.475107	1.21482e+10	5.75931e+09	1.3781e+10	9.97935e+09	1.4e+10	1.3361e+10	1.61391e+10	1.75643e+10	1.35903e+10	1.31205e+10	1.90761e+10	1.38311e+10	1.53113	Erucic acid	338.341	612.1	338.318	0.0212491	C22H42O2	[M]+	Fatty Acyls	Fatty acids and conjugates	C08316	Lipid metabolism	112-86-7	HMDB0002068	Nodiff
M339T502.pos	8.80353e+06	1.36524e+07	1.55078	0.632997	0.0401009	0.40529	8.7433e+06	8.84937e+06	5.68448e+06	9.56628e+06	1.14021e+07	8.5757e+06	9.85938e+06	1.91696e+07	9.78157e+06	1.84046e+07	1.57168e+07	8.9823e+06	1.66751	11,12-DiHETrE	339.253	502.3	338.246	0.0707437	C20H34O4	[M+H]+	Fatty Acyls	Eicosanoids	C14774	Lipid metabolism; Nervous system	192461-95-3 / NA	HMDB0002314	Up
M339T606.neg	4.74382e+07	3.18094e+07	0.670544	-0.576595	0.370166	0.81182	1.03737e+08	3.84615e+07	4.98386e+07	5.35762e+07	2.47718e+07	1.42442e+07	6.34453e+07	1.39987e+07	2.77652e+07	1.90339e+07	3.66709e+07	2.99425e+07	0.76044	Fructose 1,6-bisphosphate	339.208	606.4	339.996	24.293	C6H14O12P2	[M-H]-	Organooxygen compounds	Carbohydrates and carbohydrate conjugates	C00354	Cancer: overview; Amino acid metabolism; Signal transduction; Endocrine system	488-69-7	HMDB0001058	Nodiff
M341T51.neg	1.21282e+06	1.58835e+06	1.30963	0.389163	0.24994	0.752647	723947	1.0381e+06	463059	1.53398e+06	1.62302e+06	1.89482e+06	1.53219e+06	2.2534e+06	1.46857e+06	2.19465e+06	882516	1.19878e+06	1.0326	Trehalose	341.11	50.6	342.116	1.68861	C12H22O11	[M-H]-	Organooxygen compounds	Carbohydrates and carbohydrate conjugates	C01083	Carbohydrate metabolism; Membrane transport	99-20-7	HMDB0000975	Nodiff
M343T408.pos	5.6889e+06	7.0439e+06	1.23818	0.308225	0.884218	0.984133	2.25229e+07	3.89265e+06	6.80308e+06	299456	390186	225168	2.54956e+07	194269	2.26557e+06	75214.1	443046	1.37897e+07	0.173601	Sucrose	343.295	408.3	342.116	0.984248	C12H22O11	[M+H]+	Organooxygen compounds	Carbohydrates and carbohydrate conjugates	C00089	Carbohydrate metabolism; Membrane transport; Sensory system; Digestive system	57-50-1	HMDB0000258	Nodiff
M345T616.pos	3.8188e+07	3.24249e+07	0.849087	-0.236015	0.82943	0.97611	6.2392e+07	3.07476e+07	7.0637e+07	3.5535e+07	2.58772e+07	3.93897e+06	3.08083e+07	3.59877e+06	5.72315e+07	3.49453e+07	2.20938e+07	4.58718e+07	0.172341	Medroxyprogesterone	345.239	615.5	344.235	9.48908	C22H32O3	[M+H]+	Steroids and steroid derivatives	Pregnane steroids	C07119		520-85-4	HMDB0001939	Nodiff
M346T432_2.pos	8.69009e+06	9.39953e+06	1.08164	0.113217	0.949177	0.992065	1.14704e+06	1.26541e+06	4.18633e+07	2.20133e+06	1.1528e+06	4.51064e+06	1.75428e+06	4.63125e+07	2.25122e+06	2.65122e+06	2.69756e+06	730425	0.0218798	Cortexolone	346.331	431.7	346.214	1.73144	C21H30O4	[M]+	Steroids and steroid derivatives	Hydroxysteroids	C05488	Lipid metabolism; Endocrine and metabolic disease; Endocrine system	152-58-9	HMDB0000015	Nodiff
M346T466_2.pos	7.20995e+06	9.3079e+06	1.29098	0.368468	0.791724	0.969668	9.78493e+06	28731.5	1.04517e+07	738153	1.08261e+07	1.14301e+07	2.01285e+07	1.10768e+07	14423.3	9.54542e+06	1.50446e+07	37679.6	0.310359	Cyclic GMP	346.331	466.4	345.047	1.60505	C10H12N5O7P	[M+H]+	Purine nucleotides	Cyclic purine nucleotides	C00942	Circulatory system; Nervous system; Signal transduction; Sensory system; Endocrine system; Digestive system; Environmental adaptation; Nucleotide metabolism; Cellular community - eukaryotes; Immune system	7665-99-8	HMDB0001314	Nodiff
M347T504_1.pos	1.57534e+08	4.57872e+07	0.290649	-1.78265	0.55359	0.896993	6.3633e+08	2.80353e+07	2.27337e+08	2.0911e+07	2.17876e+07	1.08064e+07	1.25775e+08	3.78473e+07	1.52647e+07	6.23813e+07	1.4849e+07	1.86057e+07	0.613987	21-Deoxycortisol	347.219	504	346.214	7.70695	C21H30O4	[M+H]+	Steroids and steroid derivatives	Pregnane steroids	C05497	Lipid metabolism	641-77-0	HMDB0004030	Nodiff
M348T567.pos	8.00494e+07	5.52146e+07	0.689756	-0.535841	0.913508	0.988188	1.98822e+08	6.44931e+07	1.54219e+08	2.65041e+07	2.75226e+07	8.73611e+06	5.9529e+07	1.07601e+08	2.89541e+07	4.08763e+07	8.01935e+07	1.41341e+07	0.197271	Anandamide	348.289	567	347.282	0.505327	C22H37NO2	[M+H]+	Organonitrogen compounds	Amines	C11695	Environmental adaptation; Nervous system; Signaling molecules and interaction; Sensory system	94421-68-8	HMDB0004080	Nodiff
M351T391.pos	1.36217e+07	3.31526e+06	0.24338	-2.03872	0.0302358	0.373234	2.81908e+07	1.64383e+07	2.2266e+07	5.99387e+06	6.8357e+06	2.00561e+06	7.21503e+06	1.45899e+06	3.02182e+06	1.93036e+06	1.68136e+06	4.58399e+06	1.78711	Prostaglandin G2	351.214	390.8	368.22	0.0100597	C20H32O6	[M+H-H2O]+	Fatty Acyls	Eicosanoids	C05956	Lipid metabolism; Immune system; Nervous system	51982-36-6	HMDB0003235	Down
M351T480.pos	1.47005e+07	1.49609e+06	0.101771	-3.2966	0.0520627	0.441557	4.74544e+07	2.14341e+07	8.5801e+06	6.61752e+06	3.80126e+06	315698	4.1907e+06	218051	1.04027e+06	753442	633497	2.14058e+06	1.6183	9S-hydroxy-11,15-dioxo-5Z,13E-prostadienoic acid	351.215	480.1	350.209	5.62619	C20H30O5	[M+H]+	Fatty Acyls	Eicosanoids	C04758			HMDB0062297	Nodiff
M352T499.pos	1.29476e+07	1.32025e+07	1.01969	0.0281243	0.963921	0.992765	2.69874e+07	1.24321e+07	6.28137e+06	2.1356e+07	5.84537e+06	4.78327e+06	2.95638e+07	2.70747e+06	1.16277e+07	1.53962e+07	9.77956e+06	1.01402e+07	0.0721489	Prostaglandin I2	352.25	499.4	352.225	4.60641	C20H32O5	[M]+	Fatty Acyls	Eicosanoids	C01312	Circulatory system; Signal transduction; Lipid metabolism; Signaling molecules and interaction; Immune system	35121-78-9	HMDB0001335	Nodiff
M353T403_2.pos	4.03331e+06	2.90035e+06	0.719101	-0.475735	0.0546018	0.448	3.94169e+06	3.00327e+06	2.5759e+06	4.91757e+06	4.71098e+06	5.05044e+06	2.35911e+06	2.1109e+06	3.20485e+06	3.5619e+06	3.44616e+06	2.71922e+06	1.46784	(13E)-11a-Hydroxy-9,15-dioxoprost-13-enoic acid	353.243	402.5	352.225	28.9433	C20H32O5	[M+H]+	Fatty Acyls	Eicosanoids	C04654		22973-19-9	HMDB0001320	Nodiff
M357T434.pos	878764	664743	0.756452	-0.402679	0.421256	0.834216	1.53157e+06	1.25105e+06	630932	888926	593390	376717	727458	507429	723336	538679	490111	1.00144e+06	0.691511	(4Z,7Z,10Z,13Z,16Z,19Z)-Docosahexaenoic acid ethyl ester	357.279	433.7	356.272	0.492613	C24H36O2	[M+H]+			C16185		81926-94-5		Nodiff
M361T576.pos	1.1014e+07	1.15356e+07	1.04735	0.0667487	0.740898	0.956373	255079	363257	2.46467e+07	747714	2.14871e+07	1.85843e+07	463957	2.12721e+07	1.09012e+06	1.68925e+07	2.80772e+07	1.41758e+06	0.264737	Aldosterone	361.221	575.8	360.194	2.27162	C21H28O5	[M+H]+	Steroids and steroid derivatives	Hydroxysteroids	C01780	Lipid metabolism; Excretory system; Endocrine system	52-39-1	HMDB0000037	Nodiff
M363T367.pos	551974	678040	1.22839	0.296771	0.915421	0.988188	622008	891129	182537	1.17879e+06	221709	215665	470246	235365	1.59812e+06	139755	234731	1.39002e+06	0.177546	Cortisol	363.216	367.3	362.209	1.58583	C21H30O5	[M+H]+	Steroids and steroid derivatives	Hydroxysteroids	C00735	Endocrine and metabolic disease; Cancer: overview; Excretory system; Digestive system; Endocrine system; Lipid metabolism; Signaling molecules and interaction; Cancer: specific types	50-23-7	HMDB0000063	Nodiff
M363T47_1.pos	7.55075e+07	3.14998e+07	0.417174	-1.26128	0.739272	0.955702	3.18782e+08	3.0239e+07	7.47608e+07	3.38153e+06	2.57009e+07	180521	2.30009e+07	30085.6	3.89127e+07	1.60595e+07	9.79231e+06	1.01203e+08	0.289688	GMP	362.924	46.8	363.058	6.85633	C10H14N5O8P	[M]+	Purine nucleotides	Purine ribonucleotides	C00144	Sensory system; Signal transduction; Nucleotide metabolism	85-32-5	HMDB0001397	Nodiff
M365T618.pos	2.58785e+06	3.51684e+06	1.35898	0.442524	0.161481	0.635376	2.00804e+06	3.61776e+06	1.19101e+06	4.12161e+06	3.0555e+06	1.53319e+06	4.06276e+06	2.3007e+06	4.52536e+06	2.3115e+06	4.31381e+06	3.58691e+06	1.26044	Dihydrocortisol	365.241	618.1	364.225	24.1594	C21H32O5	[M+H]+	Steroids and steroid derivatives	Hydroxysteroids	C05471	Lipid metabolism	1482-50-4	HMDB0003259	Nodiff
M369T441.pos	3.72781e+06	3.80697e+06	1.02124	0.0303159	0.941592	0.991561	8.96164e+06	3.62355e+06	3.67442e+06	3.50386e+06	2.45684e+06	146533	6.56689e+06	153875	3.79041e+06	2.34677e+06	4.12744e+06	5.85645e+06	0.0806269	Carboprost	369.263	441.2	368.256	0.747434	C21H36O5	[M+H]+			C06872		35700-23-3		Nodiff
M369T509.pos	2.62486e+07	1.68517e+07	0.642004	-0.639347	0.349491	0.787168	5.22594e+07	4.46395e+07	1.79276e+07	1.93461e+07	1.40362e+07	9.2824e+06	2.41896e+07	6.56165e+06	1.94328e+07	1.40743e+07	1.93073e+07	1.75443e+07	0.819513	Misoprostol	369.263	509.2	368.256	1.21935	C21H36O5	[M+H]+			C07227		59122-46-2		Nodiff
M369T637_2.pos	7.29791e+07	1.25531e+08	1.7201	0.782491	0.00123829	0.260975	8.16867e+07	5.18434e+07	7.23944e+07	7.50562e+07	5.70037e+07	9.98903e+07	1.14538e+08	1.36709e+08	1.17941e+08	1.31789e+08	1.4284e+08	1.09371e+08	2.35967	Cholesterol	369.351	636.9	386.355	3.79044	C27H46O	[M+H-H2O]+	Steroids and steroid derivatives	Cholestane steroids	C00187	Endocrine and metabolic disease; Cancer: overview; Digestive system; Endocrine system; Lipid metabolism; Cancer: specific types	57-88-5	HMDB0000067	Up
M371T474.neg	9.03509e+06	1.55846e+07	1.72489	0.786508	0.0527883	0.643426	3.06075e+07	4.35776e+06	4.59348e+06	2.6768e+06	6.25551e+06	5.71951e+06	1.93798e+07	2.18149e+07	7.72901e+06	1.50123e+07	1.50962e+07	1.44752e+07	1.68039	Deoxycorticosterone acetate	371.066	473.7	372.23	0.422927	C23H32O4	[M-H]-			C14554		56-47-3		Nodiff
M376T473.pos	1.36165e+07	1.64663e+07	1.20929	0.27416	0.237338	0.711921	9.14393e+06	7.85745e+06	1.10426e+07	2.19097e+07	1.8792e+07	1.29534e+07	1.46975e+07	1.57892e+07	1.52729e+07	2.45121e+07	1.36348e+07	1.48913e+07	1.09427	Lithocholic acid	376.312	473.2	376.298	1.65999	C24H40O3	[M]+	Lipids and lipid-like molecules	Steroids and steroid derivatives	C03990	Digestive system	434-13-9	HMDB0000761	Nodiff
M376T622_2.pos	4.60892e+07	4.54565e+07	0.986272	-0.0199421	0.763162	0.961804	3.98796e+07	4.69239e+07	4.94032e+07	4.70783e+07	4.69097e+07	4.63404e+07	4.20613e+07	4.72564e+07	4.86248e+07	4.72796e+07	4.92596e+07	3.82572e+07	0.287666	Docosatetraenoyl Ethanolamide	376.319	621.6	375.314	0.00397382	C24H41NO2	[M+H]+			C13829		150314-35-5		Nodiff
M377T254.pos	3.88225e+06	5.4623e+06	1.40699	0.492616	0.559342	0.899119	277422	1.37755e+07	417245	5.01596e+06	438548	3.36878e+06	8.41209e+06	252504	9.97298e+06	554218	2.71761e+06	1.08644e+07	0.576189	Riboflavin	377.145	253.6	376.138	0.00025679	C17H20N4O6	[M+H]+	Pteridines and derivatives	Alloxazines and isoalloxazines	C00255	Metabolism of cofactors and vitamins; Digestive system; Membrane transport	83-88-5	HMDB0000244	Nodiff
M379T501.pos	657653	906992	1.37913	0.463764	0.692492	0.945161	2.46708e+06	365608	365559	275635	341242	130796	2.72689e+06	108321	148315	562239	1.27495e+06	621234	0.317572	Sphingosine 1-phosphate	379.257	500.8	379.249	21.6217	C18H38NO5P	[M]+	Organic oxides	Alcohols and polyols	C06124	Signal transduction; Lipid metabolism; Signaling molecules and interaction; Infectious disease: bacterial; Immune system	26993-30-6	HMDB0000277	Nodiff
M382T621.pos	2.44576e+07	2.71367e+07	1.10954	0.149961	0.33948	0.783198	2.61993e+07	1.81752e+07	2.56353e+07	2.54115e+07	2.82606e+07	2.30636e+07	3.23434e+07	2.48368e+07	2.30281e+07	2.12281e+07	3.36671e+07	2.77164e+07	0.816799	7-Dehydrodesmosterol	382.331	621	382.324	19.355	C27H42O	[M]+	Steroids and steroid derivatives	Cholestane steroids	C05107	Lipid metabolism	1715-86-2	HMDB0003896	Nodiff
M384T381.pos	3.75762e+06	2.51538e+06	0.669408	-0.579043	0.201491	0.677279	7.28591e+06	2.35738e+06	4.14095e+06	2.71768e+06	1.74597e+06	4.29785e+06	1.93431e+06	4.4125e+06	1.67218e+06	1.90304e+06	1.45728e+06	3.71299e+06	1.10257	Myriocin	384.274	380.9	401.278	0.0139807	C21H39NO6	[M+H-H2O]+			C19914		35891-70-4		Nodiff
M384T556.pos	3.31141e+07	4.4458e+07	1.34257	0.424996	0.0755704	0.500549	5.30248e+07	3.16978e+07	1.88964e+07	3.58588e+07	3.76084e+07	2.15984e+07	5.1415e+07	4.17812e+07	3.90365e+07	4.8421e+07	4.58225e+07	4.02717e+07	1.56046	7-Dehydrocholesterol	384.348	555.6	384.339	22.1154	C27H44O	[M]+	Steroids and steroid derivatives	Cholestane steroids	C01164	Lipid metabolism	434-16-2	HMDB0000032	Nodiff
M384T622.pos	1.21344e+08	1.30301e+08	1.07381	0.102744	0.786564	0.967969	4.8095e+07	9.77991e+07	9.40763e+07	6.09738e+07	5.99363e+07	3.67185e+08	2.71639e+08	3.25939e+07	3.4834e+08	4.34441e+07	4.07385e+07	4.50505e+07	0.254971	Vitamin D3	384.345	621.6	384.339	14.8304	C27H44O	[M]+	Steroids and steroid derivatives	Vitamin D and derivatives	C05443	Lipid metabolism; Immune disease; Digestive system	67-97-0	HMDB0000876	Nodiff
M385T556.pos	1.72109e+07	1.79938e+07	1.04549	0.0641807	0.865739	0.981848	2.09063e+07	2.11374e+07	5.48994e+06	2.12101e+07	1.06647e+07	2.3857e+07	2.3656e+07	5.2979e+06	4.4367e+06	2.72272e+07	2.4667e+07	2.26781e+07	0.101644	Cholestenone	385.349	555.8	384.339	3.60262	C27H44O	[M+H]+	Steroids and steroid derivatives	Cholestane steroids	C00599		601-57-0	HMDB0000921	Nodiff
M391T543.pos	4.67286e+07	5.30281e+07	1.13481	0.182451	0.393959	0.817073	1.00928e+07	5.34335e+07	5.01842e+07	6.35549e+07	5.31602e+07	4.99459e+07	5.42836e+07	5.47931e+07	4.93506e+07	5.49469e+07	4.9897e+07	5.48972e+07	0.787181	Adenosine 5'-phosphate disodium	391.283	543.3	391.027	1.84703	C10H12N5O7P. 2Na	[M]+					4578-31-8		Nodiff
M397T467.pos	4.05743e+06	4.9841e+06	1.22839	0.296766	0.586432	0.910142	4.42107e+06	2.45831e+06	1.73384e+06	2.61429e+06	6.101e+06	7.0161e+06	7.82244e+06	2.07569e+06	1.85893e+06	6.33296e+06	5.75795e+06	6.05664e+06	0.494401	Ergocalciferol	397.2	466.6	396.339	0.823781	C28H44O	[M+H]+	Steroids and steroid derivatives	Vitamin D and derivatives	C05441	Lipid metabolism	50-14-6	HMDB0000900	Nodiff
M397T470.neg	5.49884e+06	6.96414e+06	1.26647	0.340817	0.0966785	0.668708	5.67619e+06	3.75854e+06	6.26969e+06	7.4366e+06	6.5791e+06	3.27293e+06	7.0179e+06	6.67192e+06	7.0095e+06	6.48225e+06	6.61156e+06	7.9917e+06	1.66318	Daidzin	397.227	470.3	416.111	0.00682116	C21H20O9	[M-H2O-H]-	Isoflavonoids	Isoflavonoid O-glycosides	C10216		552-66-9	HMDB0033991	Nodiff
M397T599_3.pos	3.77955e+07	2.87471e+07	0.760595	-0.3948	0.814139	0.972621	1.11675e+08	2.4958e+07	4.06886e+07	1.80346e+07	2.35876e+07	7.82978e+06	3.41428e+07	4.75335e+06	2.60252e+07	3.43205e+07	2.89282e+07	4.43124e+07	0.205595	beta-Sitosterol	397.379	598.8	414.386	0.166088	C29H50O	[M+H-H2O]+	Steroids and steroid derivatives	Stigmastanes and derivatives	C01753	Lipid metabolism	83-46-5	HMDB0000852	Nodiff
M398T460_2.pos	2.69496e+08	3.34904e+08	1.24271	0.313485	0.251388	0.722978	3.68755e+08	1.6615e+08	1.68058e+08	2.8806e+08	3.02236e+08	3.23715e+08	2.90838e+08	4.85847e+08	3.5204e+08	3.7589e+08	1.97892e+08	3.06917e+08	1.01641	S-Adenosylmethionine	398.24	459.9	398.137	3.31745	C15H22N6O5S	[M]+			C00019	Amino acid metabolism; Folding, sorting and degradation	17176-17-9		Nodiff
M399T538.pos	6.34164e+06	4.22478e+06	0.666196	-0.585981	0.276775	0.739545	1.04395e+07	6.45515e+06	1.15034e+07	4.74622e+06	2.19473e+06	2.71083e+06	9.28006e+06	746857	4.48873e+06	6.55703e+06	1.00969e+06	3.26629e+06	0.968365	Tris(butoxyethyl)phosphate	399.249	537.5	398.243	2.94553	C18H39O7P	[M+H]+	Extractables/Leachables; Textile Chemicals/Auxiliary/Dyes; Industrial Chemicals		C14446		78-51-3		Nodiff
M400T480_2.pos	5.66453e+08	7.15875e+08	1.26379	0.337752	0.328116	0.778061	1.46534e+09	2.80602e+08	6.36563e+08	2.95078e+08	3.15974e+08	4.05155e+08	1.14538e+09	1.21793e+09	4.68407e+08	4.5096e+08	5.74486e+08	4.38083e+08	0.764283	Palmitoyl-L-carnitine	400.344	479.8	399.335	0.747649	C23H45NO4	[M+H]+			C02990	Lipid metabolism	2364-67-2		Nodiff
M408T643_1.pos	2.31607e+08	1.35429e+08	0.584737	-0.774141	0.549314	0.895729	1.77981e+07	1.38736e+08	2.2428e+08	2.46375e+08	4.68958e+08	2.93495e+08	3.26758e+07	2.15763e+08	9.1141e+07	1.90788e+08	1.60883e+08	1.21324e+08	0.501434	Allocholic acid	408.366	643.3	408.288	1.6726	C24H40O5	[M]+	Steroids and steroid derivatives	Bile acids, alcohols and derivatives	C00695	Lipid metabolism; Digestive system	2464-18-8 / 81-25-4	HMDB0000505	Nodiff
M415T477_2.pos	2.67808e+08	8.10809e+07	0.302757	-1.72377	0.111054	0.567066	5.7957e+08	2.62228e+08	3.94801e+08	1.88858e+08	1.62239e+08	1.91522e+07	4.07988e+07	1.28654e+07	1.50858e+08	7.4224e+07	6.21237e+07	1.45615e+08	1.31095	Sodium deoxycholate	415.212	477.4	414.275	5.1095	C24H39O4. Na	[M+H]+			C11171		302-95-4		Nodiff
M426T475.pos	5.67983e+06	3.53994e+06	0.623247	-0.682124	0.233677	0.707246	7.99599e+06	9.87815e+06	5.80701e+06	4.58382e+06	4.42472e+06	1.38928e+06	2.97812e+06	5.27581e+06	7.42448e+06	908249	2.69858e+06	1.95437e+06	1.05894	Lanosterin	426.321	475.1	426.386	1.79647	C30H50O	[M]+	Prenol lipids	Triterpenoids	C01724	Lipid metabolism	79-63-0	HMDB0001251	Nodiff
M429T658_1.pos	2.42931e+08	2.61054e+08	1.0746	0.103802	0.528784	0.887577	4.25653e+08	3.18301e+08	1.23362e+08	1.20504e+08	2.50698e+08	2.19066e+08	2.80368e+08	1.91106e+08	2.01735e+08	3.16793e+08	3.41441e+08	2.34879e+08	0.538662	24,25-Dihydrolanosterol	429.403	658.5	428.402	13.6841	C30H52O	[M+H]+	Prenol lipids	Triterpenoids	C05109	Lipid metabolism	79-62-9	HMDB0006839	Nodiff
M429T683.pos	1.68316e+07	1.24426e+07	0.73924	-0.435886	0.418055	0.832181	3.88703e+07	6.20811e+06	1.43627e+07	1.0229e+07	1.6234e+07	1.50855e+07	1.46697e+07	4.4883e+06	2.32388e+07	6.61413e+06	7.72317e+06	1.79214e+07	0.678922	(24R,24(1)R)-Fucosterol epoxide	429.371	682.6	428.365	4.36918	C29H48O2	[M+H]+			C03910				Nodiff
M432T467_2.pos	3.74153e+08	4.10825e+08	1.09801	0.134896	0.923077	0.990016	1.98969e+07	3.7776e+07	4.71914e+08	3.92125e+07	6.65557e+08	1.01056e+09	1.8784e+07	8.08977e+08	2.64763e+07	7.04514e+08	8.8655e+08	1.96476e+07	0.121463	Isovitexin	432.236	466.5	432.106	5.80866	C21H20O10	[M]+			C01714		38953-85-4 / 29702-25-8		Nodiff
M433T465.pos	1.76261e+06	2.9156e+06	1.65414	0.726081	0.10701	0.558646	3.73465e+06	1.16949e+06	2.1296e+06	1.92858e+06	1.15119e+06	462133	2.47005e+06	2.17642e+06	1.70674e+06	5.13534e+06	3.99078e+06	2.01425e+06	1.34902	Genistin	433.341	464.8	432.106	8.38078	C21H20O10	[M+H]+	Isoflavonoids	Isoflavonoid O-glycosides	C09126		529-59-9	HMDB0033988	Nodiff
M434T459.neg	2.54126e+06	2.42734e+06	0.95517	-0.0661703	0.413282	0.823135	8.21155e+06	1.91766e+06	763007	2.468e+06	1.81476e+06	72616.2	2.86203e+06	1.68787e+06	1.41435e+06	1.81239e+06	4.1196e+06	2.66779e+06	0.866248	Paxilline	434.236	458.5	435.241	5.70197	C27H33NO4	[M-H]-	Naphthopyrans		C13782		57186-25-1	HMDB0030323	Nodiff
M465T572_2.neg	2.33238e+08	2.61825e+08	1.12257	0.166803	0.237034	0.746475	7.81598e+08	1.26724e+08	1.80612e+08	7.14861e+07	1.29985e+08	1.09021e+08	2.95645e+08	3.44066e+08	1.92826e+08	2.81515e+08	2.29287e+08	2.27611e+08	1.08281	Glycocholic acid	465.305	571.7	465.309	1.39863	C26H43NO6	[M]-			C01921	Lipid metabolism; Digestive system	1192657-83-2		Nodiff
M480T370.pos	1.56156e+06	1.61401e+06	1.03359	0.0476597	0.896563	0.986781	1.49413e+06	969065	1.55789e+06	1.62276e+06	1.3448e+06	2.38072e+06	803063	2.04338e+06	2.19688e+06	2.23954e+06	1.70095e+06	700245	0.09406	26-Hydroxyecdysone	480.275	369.9	480.309	5.13708	C27H44O7	[M]+			C16499		52717-49-4		Nodiff
M495T589.pos	6.19976e+07	2.84219e+08	4.58435	2.19672	0.0195753	0.346168	5.68671e+07	5.8888e+07	4.0004e+06	4.33349e+07	9.67787e+07	1.12117e+08	1.45827e+08	1.65233e+08	1.69132e+08	5.62167e+08	5.51226e+08	1.11728e+08	1.89538	Mibefradil	495.305	589.2	495.29	11.9603	C29H38FN3O3	[M-H2O+NH4]+			C07222		116644-53-2		Up
M496T524_2.pos	2.08495e+09	1.78519e+09	0.856224	-0.223939	0.683554	0.942929	3.74354e+09	2.41694e+09	1.23418e+09	2.1312e+09	2.05676e+09	9.27093e+08	9.8241e+08	1.91711e+09	2.09194e+09	2.06478e+09	2.43892e+09	1.21597e+09	0.332219	1-palmitoylglycerophosphocholine	496.334	523.7	496.34	11.8872	C24H51NO7P	[M+H]+	Glycerophospholipids	Glycerophosphocholines	C04102		17364-16-8	HMDB0062541	Nodiff
M498T370.pos	1.65983e+06	2.78847e+06	1.67997	0.74844	0.38577	0.813549	2.83771e+06	294783	368572	378396	4.58698e+06	1.49253e+06	5.41835e+06	6.4769e+06	1.80528e+06	1.89523e+06	312456	822589	0.700282	Taurocholic acid	498.289	370.2	515.292	10.1026	C26H45NO7S	[M+H-H2O]+	Steroids and steroid derivatives	Bile acids, alcohols and derivatives	C05122	Lipid metabolism; Metabolism of other amino acids; Digestive system	81-24-3	HMDB0000036	Nodiff
M507T579_2.pos	2.51769e+07	2.11626e+07	0.840557	-0.250583	0.344038	0.784967	2.13602e+07	2.64923e+07	2.73651e+07	1.94716e+07	3.85643e+07	1.78077e+07	3.60328e+07	5.51595e+06	1.38056e+07	1.83838e+07	1.79902e+07	3.52472e+07	0.841733	Deltaline	507.268	579.3	507.283	29.5702	C27H41NO8	[M]+			C08679		6836-11-9 / 3836-11-9		Nodiff
M507T592_2.neg	4.10234e+07	5.2828e+07	1.28775	0.364855	0.0778716	0.65105	2.91382e+07	6.00247e+07	3.69024e+07	3.69032e+07	3.82692e+07	4.49028e+07	5.49179e+07	4.53204e+07	5.37484e+07	3.69966e+07	6.93471e+07	5.66375e+07	1.42539	ATP	507.119	592.2	506.996	4.6796	C10H16N5O13P3	[M]-	Purine nucleotides	Purine ribonucleotides	C00002	Endocrine and metabolic disease; Transport and catabolism; Signal transduction; Cell growth and death; Nervous system; Sensory system; Environmental adaptation; Endocrine system; Neurodegenerative disease; Cardiovascular disease; Signaling molecules and interaction; Nucleotide metabolism; Energy metabolism; Immune system	56-65-5 / 987-65-5	HMDB0000538	Nodiff
M545T649_2.pos	6.51975e+06	3.47082e+06	0.532354	-0.909542	0.297444	0.757521	2.0691e+07	4.14699e+06	5.29958e+06	4.19049e+06	3.82974e+06	960697	2.86198e+06	745773	1.82534e+06	8.0481e+06	729813	6.61391e+06	0.888408	Protoporphyrin IX	545.408	649.1	562.258	12.3641	C34H34N4O4	[M+H-H2O]+	Tetrapyrroles and derivatives	Porphyrins	C02191	Metabolism of cofactors and vitamins	553-12-8	HMDB0000241	Nodiff
M570T524_1.pos	5.28036e+07	2.77227e+07	0.525016	-0.929567	0.615753	0.920934	2.53968e+08	1.22896e+07	1.48017e+07	2.28273e+07	3.70742e+06	9.22743e+06	4.15344e+07	3.02131e+07	3.50916e+07	2.85316e+07	2.13845e+07	9.58119e+06	0.435805	Avermectin B1b aglycone	570.352	524.3	570.319	5.96432	C33H46O8	[M]+			C11963				Nodiff
M659T626.pos	4.20828e+07	1.79674e+07	0.426953	-1.22785	0.451058	0.848846	1.52103e+08	2.15052e+07	5.27142e+07	1.19185e+07	8.77619e+06	5.47947e+06	2.61851e+07	5.92391e+06	2.8923e+07	3.50329e+07	4.35201e+06	7.38726e+06	0.706445	Fucoxanthin	659.442	626.4	658.423	16.8324	C42H58O6	[M+H]+	Prenol lipids	Tetraterpenoids	C08596		3351-86-8	HMDB0002741	Nodiff

## Sheet: +Ca+B VS +Ca-B
ID	meanControl	meanTreat	foldChange	log2FoldChange	pvalue	FDR	+Ca+B 1	+Ca+B 2	+Ca+B 3	+Ca+B 4	+Ca+B 5	+Ca+B 6	+Ca-B 1	+Ca-B 2	+Ca-B 3	+Ca-B 4	+Ca-B 5	+Ca-B 6	vip	Name	mz	rt	exact_mass	ppm	formula	precursor_type	class	sub_class	KEGG	KEGG_Pathway	CAS	hmdb	Regulation
M102T42_2.pos	1.84629e+07	1.66978e+07	0.904398	-0.144971	0.829079	0.955343	1.70857e+07	2.56092e+07	8.15954e+06	2.91814e+07	5.82862e+06	2.4913e+07	2.68033e+07	6.43725e+06	2.47443e+07	8.49387e+06	2.2231e+07	1.14771e+07	0.0997741	2-Ketobutyric acid	102.034	42	102.032	2.58889	C4H6O3	[M]+	Keto acids and derivatives	Short-chain keto acids and derivatives	C00109	Carbohydrate metabolism; Amino acid metabolism	600-18-0	HMDB0000005	Nodiff
M102T46.neg	7.33373e+06	4.44471e+06	0.606064	-0.722458	0.796117	0.96542	7.34832e+06	1.5516e+06	2.17753e+07	9.81583e+06	1.96344e+06	1.5479e+06	3.21961e+06	2.25857e+06	2.12524e+06	7.89504e+06	7.74902e+06	3.42078e+06	0.270811	Dimethylglycine	102.056	45.8	103.063	2.70439	C4H9NO2	[M-H]-	Carboxylic acids and derivatives	Amino acids, peptides, and analogues	C01026	Amino acid metabolism	1118-68-9	HMDB0000092	Nodiff
M102T51.pos	1.04688e+08	1.21233e+08	1.15803	0.211676	0.370075	0.779956	1.6435e+08	8.32712e+07	1.1768e+08	1.42835e+08	6.74947e+07	5.24986e+07	1.14089e+08	1.26646e+08	1.48275e+08	8.31099e+07	9.41572e+07	1.61118e+08	0.696336	1-Aminocyclopropanecarboxylic acid	102.055	50.6	101.048	0.979863	C4H7NO2	[M+H]+	Carboxylic acids and derivatives	Amino acids, peptides, and analogues	C01234	Amino acid metabolism	22059-21-8	HMDB0036458	Nodiff
M102T689.pos	5.75489e+07	6.68645e+07	1.16187	0.216453	0.622405	0.888387	3.62782e+07	7.30509e+07	7.4619e+07	5.3989e+07	5.45264e+07	5.28299e+07	1.05995e+08	3.84499e+07	2.13594e+07	1.20328e+07	4.39979e+07	1.79353e+08	0.461547	Triethylamine	102.128	688.7	101.12	0.00529945	C6H15N	[M+H]+	Amines	Tertiary amines	C14691		121-44-8	HMDB0032539	Nodiff
M103T49.neg	1.26768e+07	1.22823e+07	0.968875	-0.0456174	0.872476	0.977202	2.48745e+07	1.00517e+07	1.07412e+07	9.00062e+06	1.45643e+07	6.82852e+06	1.02974e+07	1.0376e+07	9.58534e+06	1.13204e+07	1.43489e+07	1.77655e+07	0.167513	(R)-3-Hydroxybutyric acid	103.04	49.3	104.047	2.67856	C4H8O3	[M-H]-	Hydroxy acids and derivatives	Beta hydroxy acids and derivatives	C01089	Carbohydrate metabolism; Signal transduction	625-72-9 / 300-85-6	HMDB0000011	Nodiff
M104T50.neg	5.95212e+07	5.69631e+07	0.957022	-0.0633755	0.672516	0.94537	1.89446e+08	3.09252e+07	4.38214e+07	4.12263e+07	2.81324e+07	2.35755e+07	4.16239e+07	5.09369e+07	6.69582e+07	3.31045e+07	3.37237e+07	1.15431e+08	0.4089	L-Serine	104.036	49.5	105.043	2.65294	C3H7NO3	[M-H]-	Carboxylic acids and derivatives	Amino acids, peptides, and analogues	C00065	Cancer: overview; Membrane transport; Signal transduction; Digestive system; Lipid metabolism; Carbohydrate metabolism; Translation; Amino acid metabolism; Energy metabolism	56-45-1	HMDB0000187	Nodiff
M104T575.pos	2.70075e+07	2.02267e+07	0.748931	-0.417095	0.945309	0.986144	9.19028e+07	3.03065e+06	1.20448e+07	2.1231e+07	1.76299e+07	1.62056e+07	1.56069e+07	1.65024e+07	2.41568e+07	2.3823e+07	4.70286e+06	3.65684e+07	0.000414755	Choline	104.107	574.5	104.108	0.960551	C5H14NO	[M+H]+	Organonitrogen compounds	Quaternary ammonium salts	C00114	Cancer: overview; Membrane transport; Nervous system; Digestive system; Lipid metabolism; Amino acid metabolism	62-49-7	HMDB0000097	Nodiff
M104T622.pos	2.29944e+07	2.22654e+07	0.968297	-0.0464783	0.977653	0.993343	1.71824e+07	4.19255e+07	7.20314e+06	1.80067e+07	2.67279e+07	2.69209e+07	3.56232e+07	2.34294e+07	2.98288e+07	7.69192e+06	2.1836e+07	1.51833e+07	0.161289	gamma-Aminobutyric acid	104.107	621.9	103.063	3.6859	C4H9NO2	[M+H]+	Carboxylic acids and derivatives	Amino acids, peptides, and analogues	C00334	Metabolism of cofactors and vitamins; Metabolism of other amino acids; Signal transduction; Nervous system; Sensory system; Endocrine system; Carbohydrate metabolism; Signaling molecules and interaction; Amino acid metabolism; Substance dependence	1956-12-02	HMDB0000112	Nodiff
M105T47.neg	2.8113e+07	2.67241e+07	0.950597	-0.0730942	0.616874	0.931218	9.55853e+07	1.25031e+07	1.89473e+07	1.95094e+07	1.23655e+07	9.76728e+06	2.02795e+07	2.50659e+07	3.5204e+07	1.41852e+07	1.40651e+07	5.1545e+07	0.488214	Glyceric acid	105.02	46.5	106.027	2.62808	C3H6O4	[M-H]-	Organooxygen compounds	Carbohydrates and carbohydrate conjugates	C00258	Carbohydrate metabolism; Amino acid metabolism; Lipid metabolism	473-81-4	HMDB0000139	Nodiff
M107T99.pos	8.1527e+06	8.86805e+06	1.08774	0.121339	0.439204	0.813842	1.81934e+07	6.09613e+06	7.79887e+06	6.95952e+06	8.74472e+06	1.1236e+06	6.60699e+06	8.03643e+06	1.05069e+07	8.44481e+06	6.93731e+06	1.26758e+07	0.575416	Benzaldehyde	107.049	99	106.042	0.00100233	C7H6O	[M+H]+	Benzene and substituted derivatives	Benzoyl derivatives	C00261		100-52-7	HMDB0006115	Nodiff
M109T33.pos	3.98838e+06	4.62551e+06	1.15975	0.213809	0.25944	0.714003	6.29483e+06	2.82902e+06	2.94079e+06	3.27277e+06	4.57262e+06	4.02026e+06	4.1149e+06	5.13635e+06	4.33629e+06	3.99808e+06	3.96697e+06	6.20046e+06	0.938783	m-Cresol	109.022	33.1	108.058	2.51839	C7H8O	[M+H]+	Phenols	Cresols	C01467		108-39-4	HMDB0002048	Nodiff
M110T331.pos	8.35961e+07	7.71037e+07	0.922336	-0.116635	0.42406	0.805749	1.00991e+08	8.96471e+07	8.31426e+07	6.83014e+07	6.92245e+07	9.02705e+07	1.09861e+08	2.65083e+07	1.10584e+08	8.19257e+07	1.16586e+08	1.71569e+07	0.65354	Catechol	110.019	330.8	110.037	12.4815	C6H6O2	[M]+			C00090		120-80-9 / 12385-08-9		Nodiff
M110T642.pos	5.35075e+08	3.90129e+08	0.72911	-0.455792	0.300985	0.740676	1.0202e+09	3.33785e+08	4.81421e+08	5.81595e+08	2.54203e+08	5.39247e+08	4.6954e+08	2.4669e+08	4.82202e+08	3.52586e+08	2.73153e+08	5.16602e+08	0.968183	Hydroquinone	110.021	641.8	110.037	1.89295	C6H6O2	[M]+	Phenols	Benzenediols	C00530	Amino acid metabolism	123-31-9	HMDB0002434	Nodiff
M111T41.neg	6.46401e+06	6.55424e+06	1.01396	0.0199989	0.965678	0.994074	5.41427e+06	5.62854e+06	8.22064e+06	7.30923e+06	5.65161e+06	6.55979e+06	5.06256e+06	9.56243e+06	6.67623e+06	5.77787e+06	6.33731e+06	5.90906e+06	0.0383945	2-Furoate	111.009	40.6	112.016	2.48628	C5H4O3	[M-H]-	Furans	Furoic acid and derivatives	C01546		88-14-2	HMDB0000617	Nodiff
M111T61.neg	3.17438e+08	2.51959e+08	0.793726	-0.333286	0.788531	0.963827	1.12089e+09	1.40675e+08	1.77471e+08	2.09836e+08	1.65892e+08	8.9873e+07	1.95995e+08	2.18493e+08	3.41002e+08	1.71957e+08	1.56478e+08	4.27832e+08	0.269099	Uracil	111.02	61.4	112.027	1.80148	C4H4N2O2	[M-H]-	Diazines	Pyrimidines and pyrimidine derivatives	C00106	Metabolism of cofactors and vitamins; Metabolism of other amino acids; Nucleotide metabolism	66-22-8	HMDB0000300	Nodiff
M112T509.pos	4.06168e+07	4.26523e+07	1.05011	0.070546	0.937301	0.983173	4.20604e+07	2.11185e+07	3.0106e+07	5.17583e+07	3.80345e+07	6.06235e+07	2.30029e+07	3.2607e+07	8.17604e+07	3.99648e+07	3.01968e+07	4.8382e+07	0.187778	Pyrrole-2-carboxylic acid	111.521	508.8	111.032	14.6606	C5H5NO2	[M+H]+	Pyrroles	Pyrrole carboxylic acids and derivatives	C05942	Amino acid metabolism	634-97-9	HMDB0004230	Nodiff
M112T51.pos	5.07175e+08	6.12254e+08	1.20719	0.271647	0.172408	0.651205	3.39282e+08	8.77602e+08	4.38451e+08	4.11171e+08	4.40538e+08	5.36006e+08	6.56099e+08	7.43054e+08	6.20381e+08	5.47491e+08	6.45567e+08	4.60935e+08	1.23332	Cytosine	112.051	51.2	111.043	0.214189	C4H5N3O	[M+H]+	Diazines	Pyrimidines and pyrimidine derivatives	C00380	Nucleotide metabolism	71-30-7	HMDB0000630	Nodiff
M113T54.pos	2.17912e+06	2.39627e+06	1.09965	0.137047	0.710496	0.923382	1.98472e+06	2.77687e+06	2.72148e+06	1.84908e+06	2.36189e+06	1.38065e+06	2.7455e+06	2.76844e+06	1.05958e+06	2.32609e+06	2.58357e+06	2.89445e+06	0.156603	Heptanoic acid	113	54.3	130.099	3.92321	C7H14O2	[M+H-H2O]+	Fatty Acyls	Fatty acids and conjugates	C17714		111-14-8	HMDB0000666	Nodiff
M114T185.pos	3.53448e+07	3.62724e+07	1.02624	0.0373718	0.787187	0.945792	4.45277e+07	2.78637e+07	3.15916e+07	4.78354e+07	3.58548e+07	2.43957e+07	7.73538e+07	2.26022e+07	2.50661e+07	2.19384e+07	4.49676e+07	2.57059e+07	0.222438	2-Heptanone	113.962	184.6	114.105	16.511	C7H14O	[M]+	Organooxygen compounds	Carbonyl compounds	C08380		110-43-0	HMDB0003671	Nodiff
M114T50.pos	6.12641e+07	6.39187e+07	1.04333	0.0611964	0.68096	0.910041	4.62376e+07	5.38125e+07	4.11543e+07	1.2122e+08	5.18527e+07	5.33072e+07	6.08968e+07	1.01789e+08	6.13618e+07	5.68807e+07	4.45536e+07	5.80302e+07	0.443553	Creatinine	114.066	50.2	113.059	0	C4H7N3O	[M+H]+	Carboxylic acids and derivatives	Amino acids, peptides, and analogues	C00791	Amino acid metabolism	60-27-5	HMDB0000562	Nodiff
M114T606.pos	3.28131e+07	3.38464e+07	1.03149	0.0447322	0.680305	0.909997	2.56239e+07	2.59366e+07	2.99481e+07	5.18157e+07	2.67203e+07	3.68338e+07	2.76343e+07	3.04087e+07	4.05768e+07	3.62085e+07	3.84009e+07	2.98491e+07	0.480605	Epsilon-caprolactam	114.091	605.6	113.084	0.00641237	C6H11NO	[M+H]+	Lactams	Caprolactams	C06593		105-60-2	HMDB0062769	Nodiff
M115T100.pos	6.34976e+06	4.58029e+06	0.721332	-0.471264	0.469586	0.827654	1.47213e+06	7.08213e+06	1.11942e+07	5.74582e+06	7.18913e+06	5.41517e+06	5.34299e+06	4.01534e+06	3.08237e+06	6.53838e+06	6.54623e+06	1.9564e+06	0.590853	Dihydrouracil	115.039	100.1	114.043	1.47177	C4H6N2O2	[M+H]+	Diazines	Pyrimidines and pyrimidine derivatives	C00429	Metabolism of cofactors and vitamins; Metabolism of other amino acids; Nucleotide metabolism	504-07-4	HMDB0000076	Nodiff
M115T44.neg	7.50385e+06	8.89938e+06	1.18598	0.246074	0.526749	0.914779	2.36609e+07	2.0231e+06	5.41612e+06	6.42185e+06	1.96207e+06	5.53905e+06	2.0409e+06	2.13485e+07	5.75564e+06	6.2913e+06	7.54327e+06	1.04167e+07	0.574696	Fumaric acid	115.004	44	116.011	1.53038	C4H4O4	[M-H]-	Carboxylic acids and derivatives	Dicarboxylic acids and derivatives	C00122	Cancer: overview; Metabolism of cofactors and vitamins; Endocrine system; Carbohydrate metabolism; Cancer: specific types; Amino acid metabolism; Energy metabolism	110-17-8	HMDB0000134	Nodiff
M115T686.neg	7.00332e+08	3.69933e+08	0.528226	-0.920773	0.302991	0.881918	2.59173e+09	2.23902e+08	9.08787e+08	1.58201e+08	1.56553e+08	1.62816e+08	4.7544e+08	5.88415e+06	2.63681e+08	1.01301e+07	3.01516e+08	1.16295e+09	0.999209	Caproic acid	114.933	686.3	116.084	3.09367	C6H12O2	[M-H]-	Fatty Acyls	Fatty acids and conjugates	C01585		142-62-1 / 151-33-7	HMDB0000535	Nodiff
M116T122.pos	1.94119e+07	1.6917e+07	0.871475	-0.198469	0.720952	0.926187	6.08045e+07	7.21177e+06	2.66598e+07	1.59751e+07	3.40985e+06	2.41069e+06	2.04903e+07	1.38002e+07	2.24935e+07	2.65898e+07	2.28802e+06	1.58404e+07	0.153603	L-Proline	116.072	121.8	115.063	2.97624	C5H9NO2	[M+H]+	Carboxylic acids and derivatives	Amino acids, peptides, and analogues	C00148	Cancer: overview; Membrane transport; Digestive system; Translation; Amino acid metabolism	147-85-3	HMDB0000162	Nodiff
M117T43_2.neg	3.17122e+06	6.3503e+06	2.00248	1.00179	0.0974816	0.830684	2.69368e+06	6.73226e+06	2.47719e+06	2.45737e+06	2.40473e+06	2.26208e+06	2.65217e+06	1.16531e+07	8.73527e+06	3.14218e+06	2.91708e+06	9.00205e+06	1.57642	Succinic acid	117.02	42.7	118.027	2.35858	C4H6O4	[M-H]-	Carboxylic acids and derivatives	Dicarboxylic acids and derivatives	C00042	Cancer: overview; Metabolism of cofactors and vitamins; Nervous system; Signal transduction; Endocrine system; Carbohydrate metabolism; Amino acid metabolism; Energy metabolism	110-15-6	HMDB0000254	Nodiff
M117T459.neg	3.23874e+07	3.17553e+07	0.980483	-0.0284349	0.857491	0.975927	2.82941e+07	3.15899e+07	4.45322e+07	2.59682e+07	2.80219e+07	3.59181e+07	3.71023e+07	2.35157e+07	4.27615e+07	2.73012e+07	3.09855e+07	2.88657e+07	0.16165	Guanidoacetic acid	116.927	459.2	117.054	0.0913984	C3H7N3O2	[M]-	Carboxylic acids and derivatives	Amino acids, peptides, and analogues	C00581	Amino acid metabolism	352-97-6	HMDB0000128	Nodiff
M117T527.neg	5.77318e+07	6.43562e+07	1.11474	0.156712	0.860179	0.975927	3.29577e+07	5.50691e+07	5.97164e+07	4.67598e+07	1.33364e+08	1.85237e+07	3.43191e+07	2.96009e+07	6.88316e+07	1.22817e+08	2.05321e+07	1.10036e+08	0.21357	Methylmalonic acid	116.928	527.2	118.027	2.85327	C4H6O4	[M-H]-	Carboxylic acids and derivatives	Dicarboxylic acids and derivatives	C02170	Carbohydrate metabolism; Amino acid metabolism; Nucleotide metabolism	516-05-2	HMDB0000202	Nodiff
M117T686.neg	7.69748e+09	6.83054e+09	0.887373	-0.172387	0.946649	0.991975	2.18063e+10	5.56404e+09	6.19527e+09	5.15212e+09	3.71615e+09	3.75107e+09	6.41943e+09	4.48665e+09	7.46485e+09	4.17036e+09	5.17894e+09	1.3263e+10	0.0561915	Betaine	116.927	686.1	117.079	0.319204	C5H11NO2	[M]-	Carboxylic acids and derivatives	Amino acids, peptides, and analogues	C00719	Amino acid metabolism; Membrane transport	107-43-7 / 590-46-5	HMDB0000043	Nodiff
M118T190.pos	2.15074e+07	2.29442e+07	1.0668	0.0932961	0.347081	0.768434	2.39886e+07	1.88157e+07	2.23139e+07	2.12967e+07	2.1943e+07	2.06866e+07	2.30344e+07	2.16095e+07	2.35696e+07	2.25874e+07	1.89638e+07	2.79005e+07	0.730632	Indole	118.065	190.3	117.058	1.89726	C8H7N	[M+H]+	Indoles and derivatives	Indoles	C00463	Amino acid metabolism; Digestive system	120-72-9	HMDB0000738	Nodiff
M118T219.pos	1.91523e+07	1.97607e+07	1.03176	0.0451134	0.821565	0.95337	9.45622e+06	1.73257e+07	2.86731e+07	2.50338e+07	6.67636e+06	2.77487e+07	1.59246e+07	2.99458e+07	3.09296e+07	1.53377e+07	1.81391e+07	8.28731e+06	0.271248	5-Aminopentanoic acid	118.085	219	117.079	7.6928	C5H11NO2	[M+H]+	Carboxylic acids and derivatives	Amino acids, peptides, and analogues	C00431	Amino acid metabolism	660-88-8	HMDB0003355	Nodiff
M118T58.pos	4.53214e+09	6.38211e+09	1.40819	0.493842	0.225063	0.695162	8.55694e+08	8.79525e+09	2.37176e+09	5.33937e+09	2.54711e+09	7.28363e+09	6.21934e+09	5.48294e+09	1.25104e+10	5.65324e+09	5.01424e+09	3.41254e+09	1.20177	L-Valine	118.086	57.7	117.079	0.846838	C5H11NO2	[M+H]+	Carboxylic acids and derivatives	Amino acids, peptides, and analogues	C00183	Cancer: overview; Metabolism of cofactors and vitamins; Membrane transport; Digestive system; Translation; Amino acid metabolism	72-18-4	HMDB0000883	Nodiff
M118T686.neg	8.99555e+08	8.4996e+08	0.944867	-0.0818168	0.538678	0.918203	6.46447e+08	9.77428e+08	9.04328e+08	9.03272e+08	9.34655e+08	1.0312e+09	8.90245e+08	8.50571e+08	8.99506e+08	8.7459e+08	8.82134e+08	7.02718e+08	0.58833	L-Homoserine	117.928	686.4	119.058	7.51624	C4H9NO3	[M-H]-	Carboxylic acids and derivatives	Amino acids, peptides, and analogues	C00263	Energy metabolism; Amino acid metabolism	672-15-1 / 1927-25-9	HMDB0000719	Nodiff
M119T190.pos	1.34481e+07	1.0945e+07	0.813872	-0.297126	0.214673	0.685785	1.13033e+07	9.257e+06	1.18716e+07	1.66069e+07	1.75337e+07	1.41159e+07	7.79954e+06	8.472e+06	1.44053e+07	1.66786e+07	6.99603e+06	1.13185e+07	0.999444	5-Hydroxypentanoic acid	119.073	190.4	118.063	24.5563	C5H10O3	[M+H]+	Fatty Acyls	Fatty acids and conjugates	C02804		13392-69-3	HMDB0061927	Nodiff
M119T467.pos	7.59223e+06	5.04001e+06	0.663838	-0.591098	0.360281	0.775233	3.35352e+06	1.06619e+07	3.66379e+06	8.25527e+06	1.58214e+07	3.79751e+06	4.38634e+06	6.6962e+06	8.42468e+06	2.38215e+06	3.2536e+06	5.09709e+06	0.620847	L-2,4-diaminobutyric acid	119.085	466.5	118.074	26.2335	C4H10N2O2	[M+H]+	Carboxylic acids and derivatives	Amino acids, peptides, and analogues	C03283	Amino acid metabolism	1758-80-1	HMDB0006284	Nodiff
M119T52.neg	6.69711e+07	2.37277e+07	0.354298	-1.49697	0.0535538	0.796789	1.06649e+07	4.62977e+07	1.14284e+08	8.25187e+07	5.13786e+07	9.66831e+07	3.69897e+07	3.96256e+07	1.01863e+07	7.0393e+06	3.80586e+07	1.04666e+07	1.73676	L-Erythrulose	119.035	51.8	120.042	2.31864	C4H8O4	[M-H]-	Organooxygen compounds	Carbohydrates and carbohydrate conjugates	C02045		533-50-6/496-55-9	HMDB0006293	Nodiff
M119T575.neg	3.25269e+07	3.28186e+07	1.00897	0.0128779	0.715596	0.950971	4.27802e+06	6.46687e+07	2.96867e+07	4.42828e+07	1.0415e+07	4.18302e+07	4.37839e+07	4.85337e+07	4.56018e+07	1.21282e+07	1.20612e+07	3.48027e+07	0.370434	3-Methylthiopropionic acid	118.927	574.9	120.025	17.7605	C4H8O2S	[M-H]-	Fatty Acyls	Fatty acids and conjugates	C08276	Energy metabolism; Amino acid metabolism	646-01-5	HMDB0001527	Nodiff
M120T50.pos	8.21064e+08	3.93316e+08	0.479032	-1.06181	0.794425	0.946862	4.14783e+09	8.74602e+07	2.7982e+08	6.47957e+07	2.70704e+08	7.57806e+07	3.4131e+08	1.93582e+08	4.3017e+08	5.52779e+07	2.7066e+08	1.0689e+09	0.15318	L-Threonine	120.066	50.5	119.058	0.199891	C4H9NO3	[M+H]+	Carboxylic acids and derivatives	Amino acids, peptides, and analogues	C00188	Metabolism of cofactors and vitamins; Membrane transport; Digestive system; Translation; Amino acid metabolism	72-19-5	HMDB0000167	Nodiff
M121T270.neg	2.69236e+07	2.73432e+07	1.01558	0.0223103	0.822984	0.968781	2.55426e+07	1.51957e+07	3.19692e+07	2.90721e+07	2.7279e+07	3.24831e+07	2.74948e+07	3.13692e+07	2.5964e+07	3.03684e+07	2.97837e+07	1.90792e+07	0.188956	Phenylethylamine	121.029	269.8	121.089	5.2182	C8H11N	[M]-	Benzene and substituted derivatives	Phenethylamines	C05332	Amino acid metabolism	64-04-0	HMDB0012275	Nodiff
M123T278.pos	781432	1.05513e+06	1.35026	0.433233	0.174687	0.652638	1.05438e+06	435038	698830	1.31076e+06	604564	585017	819204	919085	1.29481e+06	733350	794717	1.76963e+06	1.13047	3-Hydroxybenzaldehyde	123.044	277.7	122.037	0.690747	C7H6O2	[M+H]+			C03067		100-83-4		Nodiff
M123T480.pos	4.32301e+06	4.88238e+06	1.1294	0.17555	0.697539	0.917789	1.15093e+07	3.13138e+06	4.00922e+06	4.45798e+06	835318	1.99481e+06	4.85146e+06	4.69164e+06	6.61177e+06	725350	3.85623e+06	8.55783e+06	0.29817	Niacinamide	123.092	479.6	122.048	2.70179	C6H6N2O	[M+H]+	Pyridines and derivatives	Pyridinecarboxylic acids and derivatives	C00153	Metabolism of cofactors and vitamins; Digestive system	98-92-0	HMDB0001406	Nodiff
M123T66.pos	4.13682e+07	6.46632e+07	1.56311	0.644424	0.172311	0.651205	1.05844e+08	1.28401e+07	4.06718e+07	5.2996e+07	1.45423e+07	2.13149e+07	4.11514e+07	5.55808e+07	7.91993e+07	3.26113e+07	3.94151e+07	1.40021e+08	1.07372	4-Hydroxybenzaldehyde	123.044	66.3	122.037	1.82048	C7H6O2	[M+H]+	Organooxygen compounds	Carbonyl compounds	C00633		123-08-0	HMDB0011718	Nodiff
M124T537.pos	3.65581e+08	4.15521e+08	1.13661	0.184732	0.4054	0.798513	1.01697e+09	1.91832e+08	2.52712e+08	2.34928e+08	2.70559e+08	2.26485e+08	2.8682e+08	3.47846e+08	4.48604e+08	3.01509e+08	3.12116e+08	7.96233e+08	0.623474	3-Hydroxybenzyl alcohol glucoside	124.086	536.6	124.052	5.02801	C7H8O2	[M]+	Organooxygen compounds	Carbohydrates and carbohydrate conjugates	C03351		143995-98-6 / 620-24-6	HMDB0038331	Nodiff
M124T62.pos	2.72299e+06	4.29744e+06	1.57821	0.65829	0.156751	0.632619	780596	1.97095e+06	2.26729e+06	2.9047e+06	3.72626e+06	4.68812e+06	3.51973e+06	4.17848e+06	8.81992e+06	4.25916e+06	2.72843e+06	2.27894e+06	1.37769	Nicotinic acid	124.04	61.9	123.032	0.00083812	C6H5NO2	[M+H]+	Pyridines and derivatives	Pyridinecarboxylic acids and derivatives	C00253	Metabolism of cofactors and vitamins; Infectious disease: bacterial	59-67-6	HMDB0001488	Nodiff
M124T678.pos	1.96848e+09	2.74876e+09	1.39639	0.481698	0.0903574	0.539872	2.25342e+09	1.39849e+09	1.50267e+09	1.8279e+09	2.00722e+09	2.82118e+09	4.47269e+09	2.01087e+09	1.88985e+09	2.46074e+09	3.2114e+09	2.44701e+09	1.40834	Picolinic acid	124.086	678.2	123.032	0.710349	C6H5NO2	[M+H]+	Pyridines and derivatives	Pyridinecarboxylic acids and derivatives	C10164	Amino acid metabolism	98-98-6 / 14639-25-9	HMDB0002243	Nodiff
M126T51.pos	3.90744e+08	4.40826e+08	1.12817	0.173987	0.269382	0.71835	2.742e+08	3.55583e+08	3.2289e+08	3.34261e+08	4.64844e+08	5.92683e+08	4.09956e+08	4.12384e+08	3.83464e+08	5.08022e+08	5.03584e+08	4.27545e+08	1.06521	Taurine	126.022	51.4	125.015	0.983954	C2H7NO3S	[M+H]+	Organic sulfonic acids and derivatives	Organosulfonic acids and derivatives	C00245	Membrane transport; Metabolism of other amino acids; Lipid metabolism; Signaling molecules and interaction; Energy metabolism	107-35-7	HMDB0000251	Nodiff
M126T73.pos	6.54597e+06	9.48786e+06	1.44942	0.535475	0.162982	0.63807	2.134e+07	1.45294e+06	1.63537e+06	3.44273e+06	6.57766e+06	4.82717e+06	4.81851e+06	1.48862e+07	5.97217e+06	1.24281e+07	5.3355e+06	1.34868e+07	1.13491	Ciliatine	125.986	72.9	125.024	1.00399	C2H8NO3P	[M+H]+	Organic phosphonic acids and derivatives	Organic phosphonic acids	C03557	Membrane transport; Metabolism of other amino acids	2041-14-7	HMDB0011747	Nodiff
M127T88.pos	3.1687e+06	2.66319e+06	0.840466	-0.250738	0.574521	0.870667	1.76564e+06	4.45094e+06	1.88399e+06	4.90976e+06	1.83127e+06	4.17063e+06	3.18647e+06	1.72017e+06	2.76241e+06	1.47771e+06	4.8377e+06	1.99468e+06	0.351507	Thymine	127.05	87.9	126.043	0.78709	C5H6N2O2	[M+H]+	Diazines	Pyrimidines and pyrimidine derivatives	C00178	Nucleotide metabolism	65-71-4	HMDB0000262	Nodiff
M128T47.neg	2.44171e+08	2.67251e+08	1.09452	0.130301	0.717877	0.951207	2.65925e+08	2.97247e+08	1.60443e+08	2.46159e+08	2.6813e+08	2.27124e+08	1.89857e+08	1.56954e+08	2.96628e+08	2.41039e+08	3.56203e+08	3.62823e+08	0.381405	Pyroglutamic acid	128.035	47.4	129.043	1.70233	C5H7NO3	[M-H]-	Carboxylic acids and derivatives	Amino acids, peptides, and analogues	C01879	Metabolism of other amino acids	98-79-3	HMDB0000267	Nodiff
M128T584.neg	2.91537e+07	6.62333e+07	2.27186	1.18388	0.0840123	0.829891	5.20906e+07	8.27877e+06	1.08495e+07	8.18278e+06	3.97442e+07	5.57767e+07	6.00272e+07	4.12148e+07	1.29305e+08	1.37545e+07	7.64994e+07	7.6599e+07	1.58605	Cyanuric acid	128.01	583.5	129.017	1.74986	C3H3N3O3	[M-H]-	Triazines	1,3,5-triazines	C06554		108-80-5/504-19-8	HMDB0041861	Nodiff
M129T44.pos	2.48147e+07	1.83205e+07	0.738291	-0.437739	0.56573	0.866687	4.12365e+06	2.61847e+07	4.47859e+07	2.73589e+07	1.72443e+07	2.91909e+07	1.18196e+07	8.5915e+06	1.81813e+07	2.82995e+07	3.50334e+07	7.99758e+06	0.441532	1,1-Dimethylbiguanide	129.102	44.3	129.101	0.0520042	C4H11N5	[M]+	Organonitrogen compounds	Guanidines	C07151	Signal transduction; Aging; Digestive system	1115-70-4 / 657-24-9	HMDB0001921	Nodiff
M129T46.neg	8.17206e+06	8.20474e+06	1.004	0.0057578	0.592509	0.926481	1.8856e+07	8.93772e+06	6.83004e+06	3.24724e+06	1.01829e+07	978472	7.4124e+06	1.39754e+07	3.51337e+06	7.92639e+06	1.04487e+07	5.95218e+06	0.567729	Itaconate	129.019	45.9	130.027	1.36413	C5H6O4	[M-H]-	Fatty Acyls	Fatty acids and conjugates	C00490		c("97-65-4", "2964-00-3")	HMDB0002092	Nodiff
M129T479.pos	9.4664e+06	1.05209e+07	1.11139	0.152364	0.00671183	0.351184	1.00802e+07	8.69213e+06	9.88482e+06	9.78504e+06	8.89465e+06	9.46158e+06	9.86709e+06	1.10444e+07	1.08251e+07	1.07718e+07	1.00484e+07	1.05683e+07	1.94454	Oxoglutaric acid	129.127	478.7	146.022	2.02777	C5H6O5	[M+H-H2O]+	Keto acids and derivatives	Gamma-keto acids and derivatives	C00026	Metabolism of other amino acids; Signal transduction; Nervous system; Endocrine system; Excretory system; Carbohydrate metabolism; Amino acid metabolism	328-50-7 / 64-15-3	HMDB0000208	Up
M130T184.pos	9.75552e+06	8.16194e+06	0.836648	-0.257307	0.555995	0.864992	1.45466e+07	1.60944e+07	7.30167e+06	6.60441e+06	6.66018e+06	7.32586e+06	7.44494e+06	9.38818e+06	8.40693e+06	8.44268e+06	7.10264e+06	8.18624e+06	0.644887	Isoquinoline	130.065	183.7	129.058	2.49105	C9H7N	[M+H]+	Isoquinolines and derivatives		C06323		119-65-3	HMDB0034244	Nodiff
M130T44.pos	6.04247e+08	3.44489e+08	0.570112	-0.810683	0.584528	0.87448	1.3672e+07	7.68877e+08	7.01011e+08	5.89604e+08	7.24382e+08	8.27939e+08	4.70656e+08	3.02351e+08	4.43346e+08	7.04799e+08	1.12759e+08	3.30215e+07	0.359196	Pipecolic acid	130.087	44.4	129.079	0.00788478	C6H11NO2	[M+H]+	Carboxylic acids and derivatives	Amino acids, peptides, and analogues	C00408	Amino acid metabolism	535-75-1 / 3105-95-1	HMDB0000070	Nodiff
M130T58.pos	3.74397e+07	3.24537e+07	0.866825	-0.206187	0.888561	0.972632	8.03565e+07	3.34198e+07	3.95677e+07	3.14205e+07	2.59053e+07	1.39687e+07	3.11132e+07	2.72377e+07	4.16801e+07	2.07151e+07	2.98785e+07	4.40976e+07	0.233745	(2E)-Decenoyl-ACP	130.086	58	129.079	0.76872	C6H11NO2	[M+H]+	Carboxylic acids and derivatives	Amino acids, peptides, and analogues	C03969		52-52-8	HMDB0062225	Nodiff
M130T678.pos	7.5008e+06	1.16627e+07	1.55487	0.63679	0.316299	0.748655	1.21826e+07	5.89514e+06	3.11197e+06	4.47148e+06	1.37805e+07	5.5631e+06	1.37235e+07	1.68528e+07	3.87344e+06	4.46302e+06	2.15694e+07	9.49426e+06	0.876055	Quinoline	130.159	678.5	129.058	1.26348	C9H7N	[M+H]+	Quinolines and derivatives		C06413		91-22-5	HMDB0033731	Nodiff
M131T107.pos	4.6418e+07	6.38885e+07	1.37637	0.460873	0.117396	0.580004	4.49567e+07	5.29467e+07	3.38175e+07	6.61822e+07	3.7392e+07	4.32127e+07	8.35593e+07	3.22452e+07	7.42058e+07	5.50315e+07	7.63887e+07	6.19006e+07	1.36357	cis-4-Hydroxy-L-proline	130.967	107.3	131.058	0.244389	C5H9NO3	[M]+			C01015		618-27-9 / 51-35-4 / 30724-02-8		Nodiff
M131T309.pos	1.72539e+06	1.62538e+06	0.942034	-0.0861484	0.788909	0.946812	4.49017e+06	941817	1.55968e+06	1.83343e+06	805677	721584	1.18771e+06	1.43004e+06	2.12509e+06	977983	1.2084e+06	2.82306e+06	0.133056	Ketoleucine	131.086	309.1	130.063	27.7678	C6H10O3	[M+H]+	Keto acids and derivatives	Short-chain keto acids and derivatives	C00233	Amino acid metabolism	816-66-0	HMDB0000695	Nodiff
M131T49.neg	1.80301e+07	2.36096e+07	1.30945	0.388964	0.450355	0.903209	2.62662e+07	7.79675e+06	4.63838e+06	1.83368e+07	1.63081e+07	3.48346e+07	1.37385e+07	1.81861e+07	2.12431e+07	1.07019e+07	1.87486e+07	5.90395e+07	0.700176	L-Asparagine	131.046	49.2	132.054	1.34304	C4H8N2O3	[M-H]-	Carboxylic acids and derivatives	Amino acids, peptides, and analogues	C00152	Cancer: overview; Amino acid metabolism; Digestive system; Translation	2058-58-4	HMDB0033780	Nodiff
M131T51_1.neg	1.89109e+07	1.66927e+07	0.882704	-0.179998	0.670296	0.945034	6.0182e+07	9.51851e+06	8.73894e+06	1.81198e+07	8.9259e+06	7.98023e+06	1.08317e+07	1.08952e+07	2.0114e+07	2.17861e+07	1.41917e+07	2.23376e+07	0.40882	Glutaric acid	131.035	50.6	132.042	1.34315	C5H8O4	[M-H]-	Carboxylic acids and derivatives	Dicarboxylic acids and derivatives	C00489	Lipid metabolism; Amino acid metabolism	110-94-1	HMDB0000661	Nodiff
M131T79.pos	8.4487e+07	1.0745e+08	1.2718	0.346869	0.169854	0.648376	6.29563e+07	7.12537e+07	1.16962e+08	7.39711e+07	8.92831e+07	9.24956e+07	1.34932e+08	9.22491e+07	1.61014e+08	9.326e+07	7.25771e+07	9.06701e+07	1.24405	Leucine	130.967	78.9	131.095	0.0406383	C6H13NO2	[M]+	Carboxylic acids and derivatives	Amino acids, peptides, and analogues	C16439		328-39-2	HMDB0062203	Nodiff
M132T171.pos	5.95453e+07	5.59564e+07	0.939728	-0.0896844	0.51423	0.848604	2.11664e+08	2.71358e+07	4.05063e+07	3.92143e+07	2.73535e+07	1.13977e+07	4.56893e+07	4.85303e+07	6.95608e+07	2.91523e+07	3.56295e+07	1.07177e+08	0.460001	L-Isoleucine	132.1	171.1	131.095	11.4301	C6H13NO2	[M+H]+	Carboxylic acids and derivatives	Amino acids, peptides, and analogues	C00407	Cancer: overview; Membrane transport; Digestive system; Translation; Amino acid metabolism	73-32-5	HMDB0000172	Nodiff
M132T250.pos	3.80123e+07	2.29139e+07	0.602802	-0.730244	0.416577	0.803059	1.03293e+08	2.75249e+07	3.98337e+07	5.14086e+06	3.25432e+07	1.97376e+07	1.06065e+07	6.91758e+07	1.17147e+07	1.46108e+07	1.3821e+07	1.75545e+07	0.820559	L-Leucine	132.1	249.6	131.095	14.9584	C6H13NO2	[M+H]+	Carboxylic acids and derivatives	Amino acids, peptides, and analogues	C00123	Cancer: overview; Membrane transport; Signal transduction; Digestive system; Translation; Amino acid metabolism	61-90-5	HMDB0000687	Nodiff
M132T364.pos	5.56955e+07	4.89125e+07	0.878212	-0.187359	0.794077	0.946862	9.20771e+07	1.57966e+07	8.27884e+07	6.39442e+07	6.65392e+07	1.30274e+07	4.86777e+07	5.57001e+07	3.3938e+07	4.23175e+07	4.89902e+07	6.38514e+07	0.1289	N,N-Diethylglycine	132.1	364.4	131.095	14.9584	C6H13NO2	[M+H]+			C16647				Nodiff
M132T46.neg	1.20182e+08	1.34799e+08	1.12162	0.165586	0.52521	0.914779	3.45162e+08	2.55508e+07	6.13527e+07	7.30466e+07	1.08883e+08	1.07098e+08	5.51734e+07	7.82814e+07	2.83832e+08	1.06472e+08	1.05038e+08	1.79999e+08	0.610345	L-Aspartic acid	132.031	46.1	133.037	3.60522	C4H7NO4	[M-H]-	Carboxylic acids and derivatives	Amino acids, peptides, and analogues	C00049	Cancer: overview; Metabolism of cofactors and vitamins; Metabolism of other amino acids; Membrane transport; Digestive system; Signaling molecules and interaction; Translation; Amino acid metabolism	56-84-8	HMDB0000191	Nodiff
M132T51_2.pos	5.92995e+09	3.062e+09	0.516362	-0.953545	0.0395095	0.473757	1.00615e+10	5.55186e+09	6.65321e+09	3.45108e+09	5.37771e+09	4.48434e+09	1.74755e+09	4.76124e+09	4.72095e+09	1.73394e+09	4.42777e+09	9.80551e+08	1.63021	Creatine	132.077	51.1	131.07	0.181712	C4H9N3O2	[M+H]+	Carboxylic acids and derivatives	Amino acids, peptides, and analogues	C00300	Amino acid metabolism	57-00-1	HMDB0000064	Down
M132T511.pos	1.59066e+07	1.13791e+07	0.715368	-0.483243	0.564321	0.865818	3.87229e+07	1.14512e+07	3.72125e+06	1.60111e+07	9.50847e+06	1.60246e+07	8.3502e+06	1.94559e+07	8.15519e+06	3.7002e+06	1.15084e+07	1.71045e+07	0.477675	(R)-Pantolactone	131.534	511.1	130.063	0.00111366	C6H10O3	[M+H]+			C01012		599-04-2		Nodiff
M132T532.pos	4.00439e+07	4.3069e+07	1.07554	0.105067	0.451801	0.819459	5.52758e+07	5.22813e+07	1.58809e+07	1.00193e+07	4.87333e+07	5.8073e+07	4.5571e+07	3.46579e+07	4.00421e+07	4.00778e+07	4.62328e+07	5.18326e+07	0.679656	N-Carbamoylputrescine	132.1	532.2	131.106	13.768	C5H13N3O	[M+H]+	Carboximidic acids and derivatives	Carboximidic acids	C00436	Amino acid metabolism	6851-51-0	HMDB0033458	Nodiff
M132T78.pos	4.70455e+07	4.5525e+07	0.967681	-0.0473963	0.766371	0.938473	3.92848e+07	5.44153e+07	2.00907e+07	2.50608e+07	1.06069e+08	3.73524e+07	2.13676e+07	2.32053e+07	9.58685e+07	1.91128e+07	8.69242e+07	2.66717e+07	0.0819568	cis-4-Hydroxy-D-proline	131.974	78.3	131.058	0.379046	C5H9NO3	[M+H]+	Carboxylic acids and derivatives	Amino acids, peptides, and analogues	C03440	Amino acid metabolism	2584-71-6	HMDB0060460	Nodiff
M133T43.neg	3.61682e+07	2.8085e+07	0.77651	-0.364924	0.93183	0.989043	1.29291e+08	1.11839e+07	2.44881e+07	3.422e+07	8.7702e+06	9.05644e+06	1.87636e+07	1.87002e+07	3.22618e+07	1.18179e+07	1.26776e+07	7.4289e+07	0.0714754	L-Malic acid	133.014	42.6	134.022	2.07496	C4H6O5	[M-H]-	Hydroxy acids and derivatives	Beta hydroxy acids and derivatives	C00149	Cancer: overview; Sensory system; Excretory system; Endocrine system; Carbohydrate metabolism; Cancer: specific types	97-67-6 / 6915-15-7	HMDB0000156	Nodiff
M133T44.pos	3.45089e+07	5.62614e+07	1.63034	0.705177	0.173934	0.652578	5.33693e+07	1.96295e+07	1.24361e+07	2.16676e+07	3.55239e+07	6.4427e+07	3.4855e+07	3.93607e+07	5.35554e+07	2.84977e+07	4.61106e+07	1.35189e+08	1.18248	Ornithine	133.097	44.4	132.09	0.931649	C5H12N2O2	[M+H]+	Carboxylic acids and derivatives	Amino acids, peptides, and analogues	C00077	Amino acid metabolism; Membrane transport; Metabolism of other amino acids	3184-13-2/70-26-8	HMDB0000214	Nodiff
M133T64_1.pos	4.06218e+08	3.47188e+08	0.854684	-0.226537	0.758363	0.935905	9.2314e+08	1.71433e+08	4.60783e+08	4.3855e+08	2.00314e+08	2.43086e+08	4.65725e+08	1.93866e+08	1.76038e+08	1.85022e+08	4.43676e+08	6.18799e+08	0.400204	5,6-Dihydro-5-fluorouracil	133.032	63.7	132.034	0.00680574	C4H5FN2O2	[M+H]+	Diazines	Pyrimidines and pyrimidine derivatives	C16630	Xenobiotics biodegradation and metabolism	696-06-0	HMDB0060402	Nodiff
M134T67.neg	776593	751427	0.967594	-0.047527	0.714615	0.950971	580603	757793	708789	893487	878187	840701	729584	793303	580492	1.01775e+06	802901	584527	0.375164	Adenine	134.048	67	135.054	2.80497	C5H5N5	[M-H]-	Imidazopyrimidines	Purines and purine derivatives	C00147	Nucleotide metabolism	73-24-5	HMDB0000034	Nodiff
M135T291.neg	8.93524e+06	2.20002e+07	2.46218	1.29994	0.078623	0.828837	6.66934e+06	5.56146e+06	6.13414e+06	2.29896e+07	6.42151e+06	5.83537e+06	5.679e+06	1.01454e+07	1.98538e+07	1.24644e+07	5.54029e+07	2.84557e+07	1.63874	o-Toluate	135.045	291.1	136.052	2.04376	C8H8O2	[M-H]-	Benzene and substituted derivatives	Benzoic acids and derivatives	C07215		118-90-1	HMDB0002340	Nodiff
M135T47_1.neg	1.78185e+08	1.80714e+08	1.01419	0.0203325	0.927139	0.98807	2.87637e+08	2.06626e+08	2.20429e+08	1.80201e+07	2.10246e+08	1.26151e+08	5.00367e+07	5.69314e+07	3.38929e+08	5.86221e+07	2.29053e+08	3.50712e+08	0.0661619	Phenyl acetate	134.893	47.3	136.052	1.51758	C8H8O2	[M-H]-			C00548		122-79-2		Nodiff
M135T561.pos	1.109e+07	1.16745e+07	1.0527	0.0740921	0.609728	0.884037	2.29332e+07	9.13448e+06	8.95246e+06	9.2459e+06	9.43888e+06	6.83531e+06	8.43728e+06	9.94392e+06	1.35202e+07	1.07597e+07	9.92816e+06	1.74575e+07	0.332898	Chavicol	135.081	561.5	134.073	0.00360996	C9H10O	[M+H]+	Phenols	1-hydroxy-2-unsubstituted benzenoids	C16930		501-92-8	HMDB0034107	Nodiff
M135T662.neg	1.51424e+07	1.23477e+07	0.815437	-0.294355	0.896289	0.980978	4.46768e+07	2.70248e+07	5.16358e+06	5.39911e+06	4.53763e+06	4.05249e+06	5.19332e+06	8.96584e+06	5.27494e+06	7.30152e+06	2.98976e+07	1.74527e+07	0.129094	N,N-Dimethyl-1,4-phenylenediamine	134.895	662.1	136.1	11.8334	C8H12N2	[M-H]-			C04203		99-98-9		Nodiff
M135T82.neg	1.99917e+06	1.41434e+06	0.707462	-0.499276	0.526326	0.914779	750166	782278	601891	4.08546e+06	3.64798e+06	2.12727e+06	971651	3.30258e+06	812984	688866	2.27922e+06	430738	0.610345	Threonate	135.031	82	136.037	10.1902	C4H8O5	[M-H]-	Organooxygen compounds	Carbohydrates and carbohydrate conjugates	C01620	Carbohydrate metabolism	c("7306-96-9", "3909-12-4", "70753-61-6")	HMDB0000943	Nodiff
M136T265.pos	1.50805e+06	1.91513e+06	1.26994	0.344756	0.817072	0.952207	380758	549870	1.53841e+06	3.5346e+06	1.87987e+06	1.16479e+06	5.75492e+06	566410	1.09908e+06	2.39453e+06	1.1667e+06	509109	0.278384	2-Phenylacetamide	136.076	265.3	135.068	1.54393	C8H9NO	[M+H]+	Benzene and substituted derivatives	Phenylacetamides	C02505	Amino acid metabolism	103-81-1	HMDB0010715	Nodiff
M136T664.pos	3.33936e+06	4.33114e+06	1.297	0.375175	0.203385	0.676719	896684	3.73287e+06	5.16761e+06	2.1979e+06	3.70082e+06	4.34026e+06	5.11726e+06	4.39252e+06	4.14586e+06	3.57913e+06	4.92538e+06	3.82667e+06	1.20752	L-Homocysteine	136.048	664.5	135.035	2.52443	C4H9NO2S	[M+H]+			C00155	Energy metabolism; Amino acid metabolism; Immune system	6027-13-0		Nodiff
M136T685_1.neg	5.70199e+07	7.3084e+07	1.28173	0.358089	0.321714	0.883279	3.071e+07	1.00354e+07	3.11532e+07	5.63702e+07	8.07438e+07	1.33107e+08	4.81228e+07	6.89729e+07	4.44113e+07	5.49759e+07	6.31631e+07	1.58858e+08	0.926933	Phenylacetic acid	135.971	684.9	136.052	10.9987	C8H8O2	[M]-	Benzene and substituted derivatives		C07086	Amino acid metabolism	103-82-2	HMDB0000209	Nodiff
M137T60.neg	1.07758e+07	6.10964e+06	0.566978	-0.818635	0.166973	0.850745	6.72146e+06	5.62092e+06	6.30388e+06	5.73673e+06	2.08016e+07	1.94702e+07	1.02032e+07	7.48407e+06	2.36568e+06	6.41418e+06	5.05475e+06	5.13595e+06	1.34023	Urocanic acid	137.036	59.7	138.043	0.729736	C6H6N2O2	[M-H]-	Azoles	Imidazoles	C00785	Amino acid metabolism	104-98-3	HMDB0000301	Nodiff
M137T61.pos	2.16572e+08	5.19068e+08	2.39674	1.26107	0.109726	0.571462	7.17362e+07	2.82591e+08	6.71564e+07	1.96302e+08	3.72234e+08	3.09413e+08	2.91896e+08	2.5762e+08	1.67846e+09	3.79284e+08	2.13826e+08	2.93324e+08	1.50263	Hypoxanthine	137.046	61.4	136.038	0.0966976	C5H4N4O	[M+H]+	Imidazopyrimidines	Purines and purine derivatives	C00262	Nucleotide metabolism	68-94-0	HMDB0000157	Nodiff
M137T83.pos	7.6274e+06	2.4688e+07	3.23676	1.69455	0.0268491	0.436826	1.16499e+06	1.68339e+06	862202	2.17953e+06	1.12018e+07	2.86724e+07	6.55282e+06	3.76841e+07	5.19268e+07	2.20415e+07	2.16032e+07	8.31987e+06	1.91021	allopurinol	137.046	83.1	136.039	0.000164142	C5H4N4O	[M+H]+			C06816		315-30-0		Up
M138T334.neg	1.38207e+07	9.39483e+06	0.679765	-0.556893	0.457661	0.903209	2.90622e+07	6.60612e+06	2.87393e+07	4.89082e+06	6.41359e+06	7.21224e+06	8.09032e+06	2.53976e+06	9.74627e+06	4.0675e+06	7.62624e+06	2.42989e+07	0.732596	4-Nitrophenol	138.02	334	139.027	1.44907	C6H5NO3	[M-H]-	Phenols	Nitrophenols	C00870		100-02-7	HMDB0001232	Nodiff
M138T343.neg	7.91857e+06	6.28162e+06	0.793278	-0.334102	0.864265	0.976513	2.48671e+06	2.6527e+06	2.46261e+06	1.74692e+07	1.22645e+07	1.01757e+07	1.15878e+07	9.48773e+06	7.30752e+06	2.82709e+06	2.2889e+06	4.19066e+06	0.164744	6-Hydroxynicotinic acid	138.02	343.4	139.027	1.68802	C6H5NO3	[M-H]-	Pyridines and derivatives	Pyridinecarboxylic acids and derivatives	C01020	Metabolism of cofactors and vitamins	5006-66-6	HMDB0002658	Nodiff
M139T394.pos	4.40223e+06	3.0918e+06	0.702327	-0.509786	0.860448	0.964798	1.64335e+07	1.85447e+06	947655	3.31456e+06	2.59256e+06	1.27066e+06	1.66283e+06	4.95072e+06	2.67739e+06	2.77053e+06	1.81276e+06	4.67658e+06	0.0775612	Isophorone	139.112	394.4	138.105	0.891369	C9H14O	[M+H]+	Carbonyl compounds	Ketones	C14743		78-59-1	HMDB0031195	Nodiff
M140T80.pos	1.7416e+07	2.09442e+07	1.20258	0.266138	0.554299	0.864992	6.29463e+06	3.54505e+07	3.48355e+06	1.56017e+06	3.16472e+07	2.60597e+07	4.69479e+06	9.70908e+06	2.4047e+07	6.14118e+07	1.52856e+07	1.05167e+07	0.556128	Acetylphosphate	139.982	79.8	139.988	0.0154351	C2H5O5P	[M]+	Organic phosphoric acids and derivatives	Phosphate esters	C00227	Carbohydrate metabolism; Metabolism of other amino acids	590-54-5	HMDB0001494	Nodiff
M142T215.pos	4.01377e+07	5.28785e+07	1.31743	0.397721	0.138619	0.608352	7.02309e+07	2.16506e+07	3.19667e+07	3.62582e+07	3.91472e+07	4.15728e+07	3.65073e+07	6.55495e+07	6.31814e+07	4.46383e+07	4.11148e+07	6.62795e+07	1.22911	O-Phosphoethanolamine	141.957	214.8	141.019	13.9423	C2H8NO4P	[M+H]+	Organic phosphoric acids and derivatives	Phosphate esters	C00346	Lipid metabolism; Signal transduction	1071-23-4	HMDB0000224	Nodiff
M144T183.pos	4.07798e+06	3.73852e+06	0.916758	-0.125388	0.502803	0.844654	2.99272e+06	4.75275e+06	4.9904e+06	5.18588e+06	3.0369e+06	3.50925e+06	6.14353e+06	672503	3.8623e+06	4.21349e+06	4.33165e+06	3.20765e+06	0.602762	Tryptophanol	144.081	183.2	161.084	29.3863	C10H11NO	[M+H-H2O]+	Indoles and derivatives	Indoles	C00955	Amino acid metabolism	526-55-6	HMDB0003447	Nodiff
M144T95.neg	3.55687e+07	5.0601e+07	1.42262	0.508555	0.486537	0.904835	3.828e+06	4.24753e+07	1.25783e+07	2.36763e+07	5.21334e+07	7.87211e+07	6.26963e+07	7.09631e+07	4.42388e+06	6.91402e+07	5.70454e+07	3.93369e+07	0.65362	Spermidine	143.916	94.6	145.158	8.29365	C7H19N3	[M-H]-	Organonitrogen compounds	Amines	C00315	Amino acid metabolism; Membrane transport; Metabolism of other amino acids; Digestive system	124-20-9	HMDB0001257	Nodiff
M145T55.neg	3.46402e+07	3.45327e+07	0.996898	-0.00448265	0.301724	0.881918	1.86019e+08	2.38409e+06	2.59424e+06	1.35175e+07	1.61367e+06	1.71298e+06	8.16549e+06	1.03009e+07	8.15586e+07	1.57663e+06	3.35662e+07	7.20284e+07	1.00268	L-Lysine	145.099	54.7	146.106	1.90216	C6H14N2O2	[M-H]-	Carboxylic acids and derivatives	Amino acids, peptides, and analogues	C00047	Metabolism of cofactors and vitamins; Membrane transport; Digestive system; Translation; Amino acid metabolism	56-87-1	HMDB0000182	Nodiff
M145T641.pos	5.00544e+08	6.27417e+08	1.25347	0.325928	0.605989	0.881871	7.09328e+08	5.20051e+08	4.54671e+08	3.9469e+08	4.87124e+08	4.374e+08	9.33894e+08	5.64218e+08	7.5825e+08	9.33221e+08	2.73232e+08	3.01688e+08	0.427265	3-Hydroxymethylglutaric acid	144.982	641.5	162.053	0.477901	C6H10O5	[M+H-H2O]+	Fatty Acyls	Fatty acids and conjugates	C03761		503-49-1	HMDB0000355	Nodiff
M146T168.pos	1.14667e+07	2.13624e+07	1.86299	0.897622	0.731681	0.929631	2.3392e+07	7.93242e+06	5.94264e+06	1.06675e+07	1.93593e+07	1.50639e+06	5.11761e+06	6.12371e+07	2.71437e+07	2.59425e+07	7.78651e+06	946837	0.321348	2-Dehydropantoate	146.06	167.6	146.058	0.0338082	C6H10O4	[M]+			C00966	Metabolism of cofactors and vitamins	470-30-4		Nodiff
M146T203.pos	5.22285e+06	3.79807e+06	0.727203	-0.459571	0.697306	0.917773	525172	5.66354e+06	9.39002e+06	5.49236e+06	3.92695e+06	6.33905e+06	2.75203e+06	1.68874e+06	4.09481e+06	5.53549e+06	7.18052e+06	1.53683e+06	0.258422	Quinolin-2-ol	146.06	203.3	145.053	1.53361	C9H7NO	[M+H]+			C06338		c("70254-42-1", "59-31-4")		Nodiff
M146T310.neg	1.21763e+08	9.92664e+06	0.0815246	-3.61662	0.174813	0.850745	4.80515e+07	3.67607e+06	6.09698e+06	6.25679e+08	3.4315e+07	1.27571e+07	1.35149e+07	3.15908e+06	1.07754e+07	2.83977e+06	5.07701e+06	2.41937e+07	1.31399	N-Methyl-D-aspartic acid	146	310.3	147.053	7.10683	C5H9NO4	[M-H]-	Carboxylic acids and derivatives	Amino acids, peptides, and analogues	C12269		6384-92-5	HMDB0002393	Nodiff
M146T44.pos	1.80769e+07	1.14773e+07	0.634914	-0.655366	0.178273	0.656785	7.65978e+06	1.97668e+07	3.01294e+07	1.3728e+07	1.82992e+07	1.88785e+07	8.49534e+06	8.5625e+06	8.0723e+06	1.89333e+07	2.36591e+07	1.14131e+06	1.12184	L-Glutamine	146.081	44.1	146.069	0.0658478	C5H10N2O3	[M]+	Carboxylic acids and derivatives	Amino acids, peptides, and analogues	C00064	Cancer: overview; Metabolism of cofactors and vitamins; Membrane transport; Nervous system; Excretory system; Digestive system; Carbohydrate metabolism; Nucleotide metabolism; Translation; Amino acid metabolism; Energy metabolism	5959-95-5	HMDB0003423	Nodiff
M146T46.neg	2.67253e+08	2.19642e+08	0.821851	-0.283051	0.52168	0.914658	1.16101e+08	2.80126e+08	1.59061e+08	2.78477e+08	4.26178e+08	3.43574e+08	2.89751e+08	8.88514e+07	1.51988e+08	2.92361e+08	2.60804e+08	2.34097e+08	0.623939	L-Glutamic acid	146.046	46.4	147.053	2.57453	C5H9NO4	[M-H]-	Carboxylic acids and derivatives	Amino acids, peptides, and analogues	C00025	Neurodegenerative disease; Biosynthesis of other secondary metabolites; Translation; Substance dependence; Cellular community - eukaryotes; Energy metabolism; Metabolism of other amino acids; Excretory system; Carbohydrate metabolism; Cancer: overview; Membrane transport; Cell growth and death; Signal transduction; Nervous system; Digestive system; Environmental adaptation; Amino acid metabolism;…	56-86-0	HMDB0000148	Nodiff
M146T53.pos	4.74467e+06	6.54817e+06	1.38011	0.464785	0.109933	0.571462	5.79165e+06	3.1772e+06	4.50944e+06	7.34912e+06	4.10061e+06	3.53999e+06	6.68571e+06	5.55635e+06	8.14839e+06	5.00353e+06	4.10652e+06	9.78854e+06	1.30831	(S)-5-Amino-3-oxohexanoate	146.081	52.6	145.074	0.848843	C6H11NO3	[M+H]+	Carboxylic acids and derivatives	Amines	C03656	Amino acid metabolism	19355-90-9	HMDB0012131	Nodiff
M146T55_2.pos	3.86269e+07	3.44151e+07	0.890961	-0.166565	0.790338	0.946862	1.18211e+07	4.63051e+07	5.58107e+07	3.82587e+07	3.61546e+07	4.34115e+07	3.2279e+07	3.0689e+07	2.80271e+07	4.87409e+07	4.92511e+07	1.75036e+07	0.179468	Acetylcholine	146.118	55	146.118	0.68438	C7H16NO2	[M+H]+	Organonitrogen compounds	Quaternary ammonium salts	C01996	Nervous system; Signal transduction; Sensory system; Endocrine system; Digestive system; Lipid metabolism; Neurodegenerative disease; Signaling molecules and interaction; Substance dependence; Cell motility	51-84-3	HMDB0000895	Nodiff
M146T56.pos	1.7848e+07	1.80078e+07	1.00895	0.0128614	0.707518	0.923268	3.4849e+07	1.06702e+07	2.3798e+07	1.56671e+07	1.03701e+07	1.17337e+07	2.20963e+07	1.86929e+07	1.29366e+07	1.51913e+07	1.41741e+07	2.49558e+07	0.13884	4-Guanidinobutanoic acid	146.093	55.7	145.085	0.848777	C5H11N3O2	[M+H]+	Carboxylic acids and derivatives	Amino acids, peptides, and analogues	C01035	Amino acid metabolism	463-00-3	HMDB0003464	Nodiff
M148T290.pos	1.24512e+06	1.58816e+06	1.27551	0.351074	0.0992348	0.556387	1.84179e+06	872777	1.0427e+06	819875	1.58867e+06	1.30489e+06	1.2372e+06	1.42839e+06	1.68531e+06	1.63899e+06	1.63185e+06	1.90721e+06	1.37176	3-Methyloxindole	148.076	289.9	147.068	0.837409	C9H9NO	[M+H]+			C02366		1504-06-9		Nodiff
M148T50_2.pos	2.32335e+07	2.25505e+07	0.970607	-0.0430412	0.780233	0.942776	3.42543e+07	1.67035e+07	2.55316e+07	4.3038e+07	9.35847e+06	1.05149e+07	2.01231e+07	2.40501e+07	2.6303e+07	1.48972e+07	1.56658e+07	3.42641e+07	0.156421	(R) 2,3-Dihydroxy-3-methylvalerate	148.08	50.3	148.074	0.708944	C6H12O4	[M]+	Fatty Acyls	Fatty acids and conjugates	C06007	Amino acid metabolism	562-43-6	HMDB0012140	Nodiff
M148T61.neg	1.03277e+08	8.81894e+07	0.853909	-0.227845	0.730037	0.952869	3.48706e+08	4.38737e+07	7.13568e+07	9.54049e+07	3.84619e+07	2.18597e+07	7.04169e+07	7.46324e+07	1.22464e+08	4.18094e+07	5.00507e+07	1.69763e+08	0.349087	L-Methionine	148.044	61	149.051	0.675475	C5H11NO2S	[M-H]-	Carboxylic acids and derivatives	Amino acids, peptides, and analogues	C00073	Cancer: overview; Amino acid metabolism; Digestive system; Translation	63-68-3	HMDB0000696	Nodiff
M149T128.neg	1.10203e+06	708633	0.643025	-0.637053	0.237545	0.86905	1.59634e+06	733382	1.5284e+06	736478	1.68022e+06	337358	344133	618948	1.38458e+06	382087	1.09815e+06	423900	1.06439	(R)-4-Hydroxymandelate	149.025	127.6	168.042	5.30116	C8H8O4	[M-H2O-H]-	Benzene and substituted derivatives	1-hydroxy-2-unsubstituted benzenoids	C05343				Nodiff
M149T33.pos	2.40513e+08	2.45766e+08	1.02184	0.0311712	0.591359	0.876346	3.62067e+07	2.25165e+08	3.34569e+08	3.11183e+08	3.19167e+08	2.16785e+08	2.64848e+08	2.17998e+08	2.2673e+08	2.39013e+08	3.38253e+08	1.87753e+08	0.595331	L-2-Hydroxyglutaric acid	148.976	33.3	148.037	5.60843	C5H8O5	[M+H]+	Fatty Acyls	Fatty acids and conjugates	C03196	Amino acid metabolism	13095-48-2	HMDB0000694	Nodiff
M149T70.pos	6.8648e+07	7.06602e+07	1.02931	0.0416802	0.79744	0.948062	4.26814e+07	4.83109e+07	6.29448e+07	6.61659e+07	1.28631e+08	6.31543e+07	1.10676e+08	5.14091e+07	7.95663e+07	6.21989e+07	7.38585e+07	4.62522e+07	0.395639	(S)-2-Methylmalate	149.06	70.2	148.037	15.5761	C5H8O5	[M+H]+			C02614		6236-09-05		Nodiff
M149T99.pos	5.27312e+07	7.79077e+07	1.47745	0.563108	0.213684	0.684901	4.24808e+07	6.05148e+07	5.44042e+07	4.64204e+07	4.65759e+07	6.59913e+07	4.76961e+07	5.18231e+07	1.44755e+08	5.4916e+07	5.03165e+07	1.17939e+08	1.15711	trans-Cinnamate	149.06	99	148.052	0.161009	C9H8O2	[M+H]+	Benzene and substituted derivatives	Carbonyl compounds	C00423	Amino acid metabolism; Metabolism of cofactors and vitamins	140-10-3		Nodiff
M150T682.neg	8.48716e+09	1.1426e+10	1.34627	0.42897	0.288366	0.880461	1.09551e+10	1.24258e+10	9.17393e+08	9.90788e+09	8.17968e+09	8.5371e+09	1.17906e+10	1.61864e+10	1.03705e+10	5.78835e+09	1.38258e+10	1.05946e+10	1.05633	L-Arabinose	149.993	681.7	150.053	1.36953	C5H10O5	[M]-	Organooxygen compounds	Carbohydrates and carbohydrate conjugates	C00259	Carbohydrate metabolism; Membrane transport	5328-37-0 / 147-81-9 / 87-72-9	HMDB0000646	Nodiff
M151T251.neg	444893	1.25135e+06	2.8127	1.49195	0.032278	0.757625	918547	80624	411141	540558	472035	246453	776842	2.06704e+06	955327	389912	960814	2.35816e+06	1.88838	2',4'-Dihydroxyacetophenone	151.041	251.4	152.047	3.52146	C8H8O3	[M-H]-	Benzene and substituted derivatives	Acetophenones	C03663		89-84-9	HMDB0029659	Up
M151T288.neg	2.25067e+06	1.8928e+06	0.840995	-0.249831	0.346648	0.886396	2.16657e+06	1.75524e+06	2.48544e+06	2.00769e+06	2.90473e+06	2.18433e+06	1.9961e+06	3.0367e+06	1.47669e+06	268324	1.95578e+06	2.62322e+06	0.929011	3-Hydroxyphenylacetic acid	151.04	288	152.047	0.873172	C8H8O3	[M-H]-	Phenols	1-hydroxy-4-unsubstituted benzenoids	C05593	Amino acid metabolism	621-37-4	HMDB0000440	Nodiff
M151T66.neg	2.30633e+07	2.48942e+07	1.07939	0.110211	0.441978	0.903209	1.68907e+06	3.27066e+07	1.98465e+07	2.04569e+07	2.2757e+07	4.09239e+07	2.31376e+07	2.76669e+07	2.19457e+07	3.12429e+07	2.09354e+07	2.44369e+07	0.783949	Mandelic acid	151.04	66.4	152.047	0.503178	C8H8O3	[M-H]-	Benzene and substituted derivatives		C01984		90-64-2 / 17199-29-0	HMDB0000703	Nodiff
M151T73.neg	9.05626e+06	7.9824e+06	0.881423	-0.182094	0.743985	0.955859	3.77531e+06	1.54671e+07	1.07242e+07	1.01964e+07	9.58237e+06	4.59224e+06	1.38991e+07	1.01034e+07	4.92107e+06	8.35419e+06	6.24337e+06	4.37324e+06	0.282662	Xanthine	151.026	72.6	152.033	1.8275	C5H4N4O2	[M-H]-	Imidazopyrimidines	Purines and purine derivatives	C00385	Biosynthesis of other secondary metabolites; Nucleotide metabolism	69-89-6	HMDB0000292	Nodiff
M151T81.pos	7.01531e+06	5.00669e+06	0.71368	-0.48665	0.409762	0.799285	1.69218e+06	7.34928e+06	1.21776e+07	8.05585e+06	4.92866e+06	7.88829e+06	3.38752e+06	2.64475e+06	5.24551e+06	7.67403e+06	8.75177e+06	2.33656e+06	0.660115	Acetaminophen	151.062	81.1	151.063	0.189414	C8H9NO2	[M]+	Phenols	1-hydroxy-2-unsubstituted benzenoids	C06804	Digestive system	103-90-2	HMDB0001859	Nodiff
M152T382.neg	6.49823e+06	7.37886e+06	1.13552	0.183351	0.41199	0.901577	6.2e+06	6.43647e+06	6.54103e+06	6.67318e+06	6.6856e+06	6.45309e+06	6.13279e+06	7.03091e+06	1.17471e+07	5.9506e+06	5.91144e+06	7.50029e+06	0.873652	3-Hydroxyanthranilic acid	152.036	382.3	153.043	2.4731	C7H7NO3	[M-H]-	Benzene and substituted derivatives	Benzoic acids and derivatives	C00632	Amino acid metabolism	548-93-6	HMDB0001476	Nodiff
M153T202.pos	2.42289e+06	1.69607e+06	0.700022	-0.514527	0.421274	0.804944	520662	2.53034e+06	4.2572e+06	2.81711e+06	1.66762e+06	2.74438e+06	1.20569e+06	880067	1.7737e+06	2.60866e+06	2.98829e+06	720030	0.638285	3,4-Dihydroxyphenylacetaldehyde	153.055	202.3	152.047	0.810168	C8H8O3	[M+H]+	Benzene and substituted derivatives	Phenylacetaldehydes	C04043	Amino acid metabolism; Neurodegenerative disease	5707-55-1	HMDB0003791	Nodiff
M153T235.neg	425250	563550	1.32522	0.406233	0.496552	0.909643	945739	203921	344040	446902	476360	134537	288294	781102	720166	419403	151990	1.02034e+06	0.676935	Protocatechuic acid	153.02	234.8	154.027	2.40053	C7H6O4	[M-H]-	Benzene and substituted derivatives	Benzoic acids and derivatives	C00230		99-50-3	HMDB0001856	Nodiff
M153T296.pos	1.09107e+06	1.89215e+06	1.73422	0.794287	0.112183	0.574812	4.83469e+06	157303	229114	1.0202e+06	149941	155159	782511	4.60844e+06	2.75474e+06	1.7899e+06	1.07467e+06	342660	1.28553	4-Hydroxy-3-methoxy-benzaldehyde	153.055	295.6	152.047	0.810168	C8H8O3	[M+H]+	Phenols	Methoxyphenols	C00755		121-33-5	HMDB0012308	Nodiff
M153T561.pos	2.30714e+07	1.84207e+07	0.798421	-0.324778	0.561584	0.865818	9.34879e+07	1.14717e+07	1.38035e+07	1.42026e+07	4.11605e+06	1.3468e+06	9.13321e+06	1.35256e+07	3.17886e+07	5.98931e+06	1.4686e+07	3.54017e+07	0.405274	Perillyl alcohol	153.091	561.4	152.12	0.243816	C10H16O	[M+H]+	Prenol lipids	Monoterpenoids	C02452		536-59-4 / 18457-55-1	HMDB0003634	Nodiff
M154T190.pos	4.96503e+08	4.83927e+08	0.974671	-0.037013	0.71769	0.924608	4.47799e+08	4.36151e+08	6.15248e+08	4.54017e+08	5.4499e+08	4.8081e+08	5.62985e+08	6.03146e+08	5.86022e+08	3.09407e+08	4.42373e+08	3.99628e+08	0.192581	2-Pyrocatechuic acid	154.042	190.2	154.027	0.887384	C7H6O4	[M]+	Benzene and substituted derivatives	Benzoic acids and derivatives	C00196		303-38-8	HMDB0000397	Nodiff
M154T559.pos	2.80982e+07	5.61755e+07	1.99926	0.999464	0.0160964	0.400377	3.45912e+07	2.41593e+07	3.48977e+07	9.50382e+06	4.09529e+07	2.44841e+07	6.35849e+07	4.02135e+07	6.15696e+07	3.64005e+07	5.70218e+07	7.82625e+07	1.86174	psi-Pelletierine	154.123	559.3	153.115	1.45339	C9H15NO	[M+H]+	Piperidines	Piperidinones	C10865		552-70-5	HMDB0034580	Up
M155T381.pos	1.82579e+07	1.78342e+07	0.976795	-0.0338724	0.927383	0.981668	2.16353e+07	2.84951e+07	1.00422e+07	2.66866e+07	1.00726e+07	1.26158e+07	2.24313e+07	1.12786e+07	1.4181e+07	1.22017e+07	2.42343e+07	2.26785e+07	0.0513414	2,3-Butanediol	155.107	381.4	154.012	0.614339	C4H10O2S2	[M+H]+	Organooxygen compounds	Alcohols and polyols	C00265		513-85-9 / 3483-12-3	HMDB0003156	Nodiff
M155T49.pos	2.1566e+07	1.9632e+07	0.910323	-0.135549	0.488013	0.83924	1.67045e+07	2.38654e+07	2.37038e+07	2.13665e+07	1.52148e+07	2.85408e+07	2.77988e+07	1.17674e+07	1.33646e+07	2.73377e+07	2.55018e+07	1.20215e+07	0.644049	Imidazol-5-yl-pyruvate	155.043	49.2	154.038	0.0486571	C6H6N2O3	[M+H]+			C03277	Amino acid metabolism			Nodiff
M156T45.pos	2.38856e+08	2.72416e+08	1.1405	0.189672	0.767269	0.938505	4.75356e+08	2.47833e+08	1.98047e+08	1.22545e+08	2.06766e+08	1.82587e+08	1.72998e+08	1.32274e+08	4.91248e+08	3.80959e+08	1.33801e+08	3.23214e+08	0.182182	L-Histidine	156.077	45	155.07	0.489336	C6H9N3O2	[M+H]+	Carboxylic acids and derivatives	Amino acids, peptides, and analogues	C00135	Cancer: overview; Membrane transport; Metabolism of other amino acids; Digestive system; Translation; Amino acid metabolism	71-00-1	HMDB0000177	Nodiff
M157T360.pos	884425	610089	0.689814	-0.535721	0.926322	0.981438	3.40576e+06	234017	552540	637905	253271	223058	433392	404977	596705	221234	299436	1.70479e+06	0.192928	3-Indoleacetonitrile	157.123	359.6	156.069	0.0155382	C10H8N2	[M+H]+	Indoles and derivatives	Indoles	C02938	Amino acid metabolism	771-51-7	HMDB0006524	Nodiff
M157T80.pos	3.87272e+07	6.45996e+07	1.66807	0.738178	0.0599792	0.494026	2.59165e+07	1.38156e+07	3.33689e+07	2.17772e+07	4.35628e+07	9.39222e+07	4.66995e+07	7.19081e+07	1.06454e+08	5.33772e+07	5.98111e+07	4.93472e+07	1.68595	Uracil 5-carboxylate	156.966	79.7	156.017	1.29578	C5H4N2O4	[M+H]+			C03030		23945-44-0		Nodiff
M158T428.pos	2.73948e+07	7.05847e+07	2.57657	1.36545	0.0275799	0.439725	8.40516e+07	2.20886e+07	2.95666e+07	6.09022e+06	1.82571e+07	4.31472e+06	7.4025e+07	9.77997e+07	9.47548e+07	3.73472e+07	4.1467e+07	7.81143e+07	1.71697	4,5-Dihydroorotic acid	158.154	428.3	158.033	1.69266	C5H6N2O4	[M]+	Carboxylic acids and derivatives	Amino acids, peptides, and analogues	C00337	Nucleotide metabolism	155-54-4 / 5988-19-2	HMDB0000528	Up
M158T61.pos	3.42722e+07	4.79328e+07	1.39859	0.483974	0.178398	0.65693	2.7975e+07	1.3674e+07	2.59013e+07	1.79624e+07	5.25385e+07	6.75821e+07	2.59592e+07	5.90293e+07	3.71688e+07	5.42886e+07	3.7138e+07	7.40131e+07	1.16525	Pelargonic acid	158.154	60.7	158.131	2.65665	C9H18O2	[M]+	Fatty Acyls	Fatty acids and conjugates	C01601		112-05-0	HMDB0000847	Nodiff
M159T62.pos	3.88725e+06	4.93644e+06	1.26991	0.344722	0.237297	0.700445	5.57005e+06	3.77676e+06	4.12552e+06	4.38862e+06	3.05604e+06	2.40649e+06	4.27755e+06	2.85056e+06	5.06122e+06	5.81582e+06	4.05931e+06	7.55418e+06	0.853435	2-Hydroxy-3-oxoadipate	159.028	61.6	176.032	20.3361	C6H8O6	[M+H-H2O]+			C03217	Carbohydrate metabolism			Nodiff
M160T170.pos	4.39905e+07	3.99776e+07	0.908778	-0.138	0.386352	0.78678	1.8962e+08	1.05472e+07	1.49434e+07	2.55023e+07	1.51077e+07	8.22256e+06	3.10556e+07	4.47484e+07	4.47594e+07	1.55343e+07	2.1364e+07	8.24042e+07	0.674445	Pimelic acid	159.971	169.7	160.074	11.6804	C7H12O4	[M]+	Fatty Acyls	Fatty acids and conjugates	C02656	Metabolism of cofactors and vitamins	111-16-0	HMDB0000857	Nodiff
M160T272.pos	1.56745e+06	1.99515e+06	1.27286	0.348075	0.207399	0.679737	2.19345e+06	1.91163e+06	1.18275e+06	1.78326e+06	1.49826e+06	835349	1.79491e+06	1.23739e+06	2.04622e+06	1.83608e+06	1.97771e+06	3.07857e+06	0.986941	D-Alanyl-D-alanine	160.097	271.6	160.085	0.24262	C6H12N2O3	[M]+	Carboxylic acids and derivatives	Amino acids, peptides, and analogues	C00993		923-16-0	HMDB0003459	Nodiff
M161T527.neg	4.26178e+07	3.70841e+07	0.870157	-0.200653	0.966848	0.994074	1.77584e+07	4.82655e+07	2.82447e+07	1.37034e+07	8.76108e+07	6.01238e+07	4.32985e+07	5.34233e+07	3.66278e+07	1.89788e+07	1.96604e+07	5.05161e+07	0.0258199	Nicotine	160.936	527.2	162.116	9.39376	C10H14N2	[M-H]-	Pyridines and derivatives	Pyrrolidinylpyridines	C00745	Environmental adaptation; Xenobiotics biodegradation and metabolism; Substance dependence	1954-11-05	HMDB0001934	Nodiff
M162T316.pos	1.09172e+06	1.9148e+06	1.75394	0.810596	0.0555514	0.488752	449632	2.45118e+06	979549	1.22399e+06	356758	1.0892e+06	2.16954e+06	1.44402e+06	3.12485e+06	1.53675e+06	1.61539e+06	1.59828e+06	1.63546	Indole-3-carboxylic acid	162.055	316.1	161.048	0.0110536	C9H7NO2	[M+H]+	Indoles and derivatives	Indolecarboxylic acids and derivatives	C19837		771-50-6	HMDB0003320	Nodiff
M162T364.pos	2.09254e+06	4.46501e+06	2.13377	1.09341	0.331061	0.758479	1.05148e+07	43868	20996	1.79549e+06	144630	35511	1.42933e+06	305043	1.65972e+06	17827.8	1.6818e+06	2.16964e+07	0.841766	Phenacetin	162.092	363.8	179.095	27.3549	C10H13NO2	[M+H-H2O]+			C07591		62-44-2		Nodiff
M163T175.neg	294505	328153	1.11425	0.156078	0.158437	0.850745	239298	262332	293321	312047	359698	300335	302879	318501	399544	320674	333340	293983	1.37899	Phenylpyruvic acid	163.04	174.8	164.047	1.07949	C9H8O3	[M-H]-	Benzene and substituted derivatives	Phenylpyruvic acid derivatives	C00166	Amino acid metabolism	156-06-9	HMDB0000205	Nodiff
M163T185.neg	396418	392586	0.990335	-0.0140117	0.770892	0.958213	373321	398460	342721	424083	491094	348826	363701	326919	350104	364471	297443	652878	0.284568	Enol-phenylpyruvate	163.04	184.5	164.047	1.07949	C9H8O3	[M-H]-	Benzene and substituted derivatives	Carbonyl compounds	C02763	Amino acid metabolism	5801-57-0	HMDB0012225	Nodiff
M163T298.pos	1.37096e+06	5.21555e+06	3.80431	1.92764	0.00275089	0.264585	2.35576e+06	825428	732460	623448	737957	2.95068e+06	3.49617e+06	3.02274e+06	1.27222e+07	3.77561e+06	3.879e+06	4.39755e+06	2.17078	Anabasine	163.039	297.6	162.116	0.0428267	C10H14N2	[M+H]+			C06180		13078-04-1 / 494-52-0	HMDB0004350	Up
M163T414.pos	7.79856e+07	8.04324e+07	1.03137	0.0445678	0.960484	0.990086	5.95666e+07	7.66893e+07	7.37349e+07	9.33865e+07	9.72407e+07	6.72958e+07	1.29716e+08	7.84334e+07	7.74763e+07	7.31191e+07	5.17609e+07	7.20887e+07	0.120576	2-Deoxystreptamine	163.112	414.1	162.1	0.0037162	C6H14N2O3	[M+H]+			C02627	Biosynthesis of other secondary metabolites	2037-48-1		Nodiff
M163T55.neg	7.3762e+06	5.08649e+06	0.689581	-0.536208	0.673002	0.94537	2.22172e+07	3.10055e+06	6.68321e+06	6.70505e+06	2.65086e+06	2.90034e+06	4.72842e+06	2.72368e+06	5.54739e+06	2.72538e+06	4.064e+06	1.07301e+07	0.432562	Mannitol	163.061	55.1	182.079	4.8448	C6H14O6	[M-H2O-H]-	Organooxygen compounds	Carbohydrates and carbohydrate conjugates	C00392	Carbohydrate metabolism; Membrane transport	69-65-8	HMDB0000765	Nodiff
M163T62.neg	2.59791e+06	4.81686e+06	1.85413	0.890741	0.116435	0.834055	7.24798e+06	1.01265e+06	2.18186e+06	1.92503e+06	2.22854e+06	991397	2.25707e+06	1.16686e+07	2.38571e+06	6.1397e+06	3.00543e+06	3.44462e+06	1.44344	4-Hydroxycinnamic acid	163.04	62.4	164.047	1.07949	C9H8O3	[M-H]-	Cinnamic acids and derivatives	Hydroxycinnamic acids and derivatives	C00811	Amino acid metabolism; Metabolism of cofactors and vitamins	7400-08-0 / 7400-08-0 501-98-4 / 501-98-4	HMDB0002035	Nodiff
M164T34.pos	6.66502e+06	7.75314e+06	1.16326	0.21817	0.0889744	0.538831	4.66395e+06	6.61937e+06	7.41752e+06	7.02926e+06	6.72925e+06	7.53077e+06	8.68998e+06	7.60663e+06	8.54265e+06	7.69798e+06	7.15367e+06	6.8279e+06	1.54086	Acetylcysteine	163.94	33.8	163.03	2.76561	C5H9NO3S	[M+H]+	Carboxylic acids and derivatives	Amino acids, peptides, and analogues	C06809		616-91-1	HMDB0001890	Nodiff
M164T91.neg	4.86905e+08	3.1848e+08	0.65409	-0.612439	0.763611	0.957947	2.08562e+09	1.49166e+08	2.31089e+08	2.27834e+08	1.59125e+08	6.85958e+07	2.4494e+08	2.66416e+08	4.15837e+08	1.45074e+08	1.84386e+08	6.54226e+08	0.304465	D-Phenylalanine	164.072	90.8	165.079	2.90116	C9H11NO2	[M-H]-			C02265	Amino acid metabolism; Sensory system	673-06-3		Nodiff
M165T330.pos	1.88587e+06	2.13869e+06	1.13406	0.181494	0.672247	0.90692	2.20921e+06	1.6024e+06	1.5903e+06	2.61934e+06	1.10445e+06	2.18955e+06	908571	1.11543e+06	2.91744e+06	3.22724e+06	251229	4.41223e+06	0.43619	Eugenol	165.091	330.2	164.084	0.0123312	C10H12O2	[M+H]+	Phenols	Methoxyphenols	C10453		97-53-0	HMDB0005809	Nodiff
M165T378.neg	6.65325e+06	6.36384e+06	0.956501	-0.0641615	0.30474	0.882195	6.34071e+06	7.64213e+06	6.36353e+06	6.55436e+06	6.50665e+06	6.5121e+06	6.27262e+06	6.48629e+06	6.37468e+06	6.60749e+06	6.87792e+06	5.56402e+06	0.956411	4-Hydroxyphenylglyoxylate	165.02	378.4	166.027	6.52045	C8H6O4	[M-H]-	Benzene and substituted derivatives	1-hydroxy-2-unsubstituted benzenoids	C03590		15573-67-8		Nodiff
M165T547_2.neg	4.18845e+08	6.97448e+08	1.66517	0.735669	0.235425	0.866511	1.56148e+08	2.86328e+08	2.35834e+08	1.30285e+09	2.79193e+08	2.52716e+08	1.04916e+09	6.50185e+08	1.88401e+08	1.36072e+09	2.26945e+08	7.09277e+08	1.10873	Desaminotyrosine	165.041	547.1	166.063	6.61323	C9H10O3	[M-H]-	Phenylpropanoic acids		C01744		501-97-3	HMDB0002199	Nodiff
M165T592.neg	3.61141e+07	4.03131e+07	1.11627	0.158686	0.844949	0.975185	6.94234e+07	2.65913e+07	2.00739e+07	6.0351e+07	2.08025e+07	1.94424e+07	1.80515e+07	1.7233e+07	6.22826e+07	6.20681e+07	1.83268e+07	6.39165e+07	0.187274	Phthalic acid	165.041	592.1	166.027	7.77482	C8H6O4	[M-H]-	Benzene and substituted derivatives	Benzoic acids and derivatives	C01606	Membrane transport	88-99-3 / 3198-29-6	HMDB0002107	Nodiff
M165T90.neg	4.93124e+06	4.55688e+06	0.924084	-0.113904	0.699247	0.948707	1.80069e+07	2.64039e+06	1.91023e+06	3.2015e+06	2.69851e+06	1.12992e+06	2.07784e+06	1.17094e+07	1.90133e+06	3.97755e+06	3.66785e+06	4.00728e+06	0.370962	Phenyllactate	165.056	90.3	166.063	2.27801	C9H10O3	[M-H]-	Phenylpropanoic acids		C05607	Amino acid metabolism	7326-19-4	HMDB0000563	Nodiff
M166T374.neg	8.95833e+06	9.97279e+06	1.11324	0.154767	0.578336	0.926112	3.05448e+07	4.5687e+06	4.60998e+06	4.46688e+06	5.14974e+06	4.40983e+06	4.40438e+06	2.61847e+07	4.52866e+06	1.05941e+07	7.65953e+06	6.46538e+06	0.51607	6-Methylmercaptopurine	166.016	373.9	166.031	26.5505	C6H6N4S	[M]-	Imidazopyrimidines	Purines and purine derivatives	C16614	Xenobiotics biodegradation and metabolism	50-66-8	HMDB0060412	Nodiff
M166T407.neg	5.373e+06	4.43986e+06	0.826327	-0.275215	0.279273	0.879241	6.56e+06	4.83574e+06	6.25277e+06	4.28607e+06	4.44575e+06	5.85768e+06	1.55224e+06	1.68343e+06	7.85772e+06	5.22097e+06	5.1021e+06	5.22267e+06	1.07546	3-Methylxanthine	166.052	407.1	166.049	14.4533	C6H6N4O2	[M]-	Imidazopyrimidines	Purines and purine derivatives	C16357	Biosynthesis of other secondary metabolites	1076-22-8	HMDB0001886	Nodiff
M166T51.pos	4.67177e+08	5.08537e+08	1.08853	0.122383	0.343314	0.766016	3.76502e+08	5.31377e+08	3.83511e+08	4.56065e+08	5.56365e+08	4.99244e+08	4.9227e+08	6.10116e+08	5.27997e+08	4.24087e+08	4.40286e+08	5.56468e+08	0.964195	L-Methionine S-oxide	166.053	50.8	165.046	0.144532	C5H11NO3S	[M+H]+	Endogenous Metabolites		C02989	Amino acid metabolism	3226-65-1		Nodiff
M166T58.pos	1.18765e+07	1.76347e+07	1.48484	0.570308	0.235903	0.700445	3.22446e+07	7.79101e+06	1.00108e+07	9.1025e+06	9.0855e+06	3.0245e+06	8.00912e+06	4.09118e+07	2.0452e+07	1.32089e+07	1.11303e+07	1.2096e+07	0.9307	7-Methylguanine	166.072	57.7	165.065	0.00504575	C6H7N5O	[M+H]+	Imidazopyrimidines	Purines and purine derivatives	C02242		578-76-7	HMDB0000897	Nodiff
M166T99.pos	4.11578e+09	5.23855e+09	1.27279	0.347999	0.0866197	0.535198	5.5878e+09	3.50537e+09	5.01666e+09	4.67833e+09	3.54814e+09	2.35841e+09	5.35317e+09	4.79137e+09	5.12946e+09	5.0015e+09	4.91738e+09	6.23839e+09	1.34159	L-Phenylalanine	166.086	99	165.079	0.0267317	C9H11NO2	[M+H]+			C00079	Cancer: overview; Membrane transport; Digestive system; Translation; Amino acid metabolism	673-06-3		Nodiff
M167T302.pos	1.29791e+06	1.88668e+06	1.45363	0.539656	0.163252	0.638322	1.49702e+06	548713	1.3156e+06	983689	1.15585e+06	2.28661e+06	1.55525e+06	964119	2.86487e+06	1.58521e+06	1.50225e+06	2.84839e+06	1.20306	3,4-Dihydroxymandelic acid	167.03	302	184.037	4.39441	C8H8O5	[M+H-H2O]+	Phenols	Benzenediols	C05580	Amino acid metabolism	775-01-9	HMDB0001866	Nodiff
M167T408.pos	7.80684e+06	8.77773e+06	1.12436	0.169109	0.221304	0.691322	7.2742e+06	6.94467e+06	8.13339e+06	6.32542e+06	7.08866e+06	1.10747e+07	1.0242e+07	8.08505e+06	9.63545e+06	9.48806e+06	7.55677e+06	7.65904e+06	1.08547	Cyromazine	167.107	408	166.097	16.8994	C6H10N6	[M+H]+	Triazines	Aminotriazines	C14147		66215-27-8	HMDB0029862	Nodiff
M167T48.neg	4.47788e+08	7.15183e+08	1.59715	0.675497	0.0214872	0.69288	2.73822e+08	5.79112e+08	5.91704e+08	3.08919e+08	4.57878e+08	4.75292e+08	8.54541e+08	7.29456e+08	1.02585e+09	5.89065e+08	6.26526e+08	4.65664e+08	2.03107	Uric acid	167.021	47.7	168.028	0.143695	C5H4N4O3	[M-H]-	Imidazopyrimidines	Purines and purine derivatives	C00366	Digestive system; Nucleotide metabolism	69-93-2	HMDB0000289	Up
M168T99.pos	1.55265e+07	1.83841e+07	1.18404	0.243724	0.315294	0.748489	2.64358e+07	1.33764e+07	1.51992e+07	1.24758e+07	1.17953e+07	1.38766e+07	1.17616e+07	1.76254e+07	2.35301e+07	1.57786e+07	1.61198e+07	2.54891e+07	0.77278	D-synephrine	168.091	99	167.095	2.86475	C9H13NO2	[M+H]+	Benzene and substituted derivatives	Phenols	C01869		614-35-7	HMDB0062811	Nodiff
M169T277_1.neg	5.3675e+06	5.37973e+06	1.00228	0.00328458	0.998365	0.999406	4.70209e+06	5.76292e+06	5.27453e+06	5.56766e+06	5.06165e+06	5.83614e+06	5.23732e+06	6.09667e+06	6.10229e+06	4.64914e+06	5.30304e+06	4.88994e+06	0.0220442	Gallic acid	169.016	276.6	170.022	8.73292	C7H6O5	[M-H]-	Benzene and substituted derivatives	Benzoic acids and derivatives	C01424		149-91-7	HMDB0005807	Nodiff
M169T42.pos	8.01106e+06	1.13658e+07	1.41876	0.504629	0.630108	0.889785	6.38442e+06	2.14806e+07	8.50234e+06	1.91867e+06	4.86267e+06	4.91764e+06	1.11724e+07	7.61794e+06	1.39931e+07	3.01375e+07	2.32269e+06	2.95091e+06	0.348946	(S)-4-Hydroxymandelate	169.046	41.9	168.042	0.691062	C8H8O4	[M+H]+			C03198				Nodiff
M170T45.pos	4.22702e+07	4.36447e+07	1.03252	0.0461659	0.699611	0.919488	5.6646e+07	3.6164e+07	4.03426e+07	4.09465e+07	4.51729e+07	3.43492e+07	3.9257e+07	4.27423e+07	3.68598e+07	4.35512e+07	4.35571e+07	5.59009e+07	0.186135	1-Methylhistidine	170.094	44.5	169.085	9.99447	C7H11N3O2	[M+H]+	Carboxylic acids and derivatives	Amino acids, peptides, and analogues	C01152	Amino acid metabolism	332-80-9/368-16-1	HMDB0000001	Nodiff
M170T49.pos	1.41947e+07	1.43491e+07	1.01088	0.0156111	0.68779	0.913745	1.35868e+07	1.47076e+07	1.3809e+07	1.45786e+07	1.41432e+07	1.43428e+07	1.43039e+07	1.49702e+07	1.34115e+07	1.42267e+07	1.5396e+07	1.37865e+07	0.392194	Pyridoxine	169.986	49.4	169.074	3.9949	C8H11NO3	[M+H]+	Pyridines and derivatives	Pyridoxines	C00314	Metabolism of cofactors and vitamins	65-23-6	HMDB0000239	Nodiff
M170T561.pos	3.28643e+07	4.47165e+07	1.36064	0.444283	0.105093	0.566075	2.48742e+07	3.56297e+07	3.23288e+07	3.73222e+07	3.39277e+07	3.31034e+07	3.49806e+07	3.6836e+07	3.55986e+07	7.98137e+07	4.46305e+07	3.64394e+07	1.32715	8-Amino-7-oxononanoate	170.117	561.5	187.121	23.1252	C9H17NO3	[M+H-H2O]+			C01092	Metabolism of cofactors and vitamins	4707-58-8		Nodiff
M170T670.pos	3.17385e+07	3.51828e+07	1.10852	0.148636	0.187265	0.667066	2.84428e+07	3.06998e+07	3.3933e+07	3.13619e+07	2.96858e+07	3.63078e+07	4.59466e+07	3.30725e+07	3.43249e+07	3.3985e+07	3.30691e+07	3.06988e+07	1.16836	Diphenylamine	170.097	669.5	169.089	0.00200855	C12H11N	[M+H]+	Benzene and substituted derivatives	Anilines	C11016		122-39-4	HMDB0032562	Nodiff
M170T73.pos	4.26223e+07	4.01788e+07	0.942671	-0.0851731	0.473013	0.829622	1.14378e+08	3.13229e+07	3.09643e+07	4.7372e+07	3.09425e+07	753628	2.5974e+07	4.2362e+07	3.50505e+07	4.00696e+07	3.56119e+07	6.20048e+07	0.522247	Norepinephrine	169.977	73.2	169.074	0.14004	C8H11NO3	[M+H]+	Phenols	Benzenediols	C00547	Circulatory system; Nervous system; Signal transduction; Sensory system; Endocrine system; Digestive system; Environmental adaptation; Signaling molecules and interaction; Amino acid metabolism; Cellular community - eukaryotes	51-41-2	HMDB0000216	Nodiff
M171T242.pos	1.25343e+06	1.17887e+06	0.940518	-0.0884722	0.677783	0.909082	1.87643e+06	1.05698e+06	1.19703e+06	1.25538e+06	1.14894e+06	985808	1.04592e+06	1.08997e+06	1.18045e+06	1.14542e+06	1.08575e+06	1.52573e+06	0.503907	N-Butyryl-L-homoserine lactone	171.092	242	171.089	14.0275	C8H13NO3	[M]+			C11837		67605-85-0		Nodiff
M172T291.pos	8.49079e+07	9.34437e+07	1.10053	0.138199	0.292704	0.734505	6.72322e+07	9.37153e+07	6.26987e+07	8.00387e+07	9.80507e+07	1.07712e+08	1.02685e+08	1.04338e+08	9.66315e+07	8.12694e+07	8.58591e+07	8.9879e+07	1.10293	Gabapentin	172.133	290.8	171.126	0.083681	C9H17NO2	[M+H]+			C07018		60142-96-3		Nodiff
M172T33.pos	2.74239e+07	2.80367e+07	1.02235	0.0318846	0.518739	0.850016	8.51605e+06	4.69281e+07	3.24682e+07	3.10141e+07	4.50833e+07	533417	3.96256e+07	3.20778e+07	1.07275e+07	1.12325e+07	3.62393e+07	3.83175e+07	0.520161	3-Dehydroshikimate	171.992	33.2	172.037	8.30932	C7H8O5	[M]+			C02637	Amino acid metabolism	2922-42-1		Nodiff
M172T42.neg	1.27394e+07	7.89889e+06	0.620039	-0.68957	0.158689	0.850745	2.92394e+07	9.45315e+06	1.11704e+07	1.16786e+07	8.64483e+06	6.24985e+06	6.39386e+06	5.5911e+06	8.14458e+06	3.64241e+06	9.80017e+06	1.38213e+07	1.31817	4-Quinolinecarboxylic acid	171.912	42.4	173.048	14.2767	C10H7NO2	[M-H]-			C06414		486-74-8		Nodiff
M173T176.neg	5.11475e+07	3.08454e+07	0.603068	-0.729608	0.452299	0.903209	6.14079e+07	5.19488e+07	1.23431e+07	4.55648e+07	1.26036e+08	9.58513e+06	4.96907e+07	1.24239e+07	9.99356e+06	1.15162e+07	5.38249e+07	4.76233e+07	0.696201	Shikimic acid	172.992	176.1	174.053	29.2887	C7H10O5	[M-H]-	Organooxygen compounds	Alcohols and polyols	C00493	Amino acid metabolism	138-59-0	HMDB0003070	Nodiff
M173T390.pos	2.33212e+06	2.38679e+06	1.02344	0.033426	0.87813	0.969643	644502	2.52991e+06	2.26716e+06	3.80376e+06	2.3974e+06	2.35001e+06	2.50361e+06	1.35382e+06	4.6505e+06	1.36776e+06	2.358e+06	2.08704e+06	0.330916	Quinaldic acid	173.165	390.4	173.048	0.535269	C10H7NO2	[M]+	Quinolines and derivatives	Quinoline carboxylic acids	C06325		1993-10-07	HMDB0000842	Nodiff
M173T41.neg	6.08207e+06	7.35527e+06	1.20934	0.274217	0.524924	0.914779	3.58888e+06	8.5839e+06	1.23989e+07	1.75518e+06	5.11892e+06	5.04661e+06	1.37029e+07	2.80513e+06	6.51506e+06	4.08788e+06	9.5623e+06	7.45841e+06	0.645558	Isocitrate	173.009	41.2	192.027	4.56623	C6H8O7	[M-H2O-H]-	Carboxylic acids and derivatives	Tricarboxylic acids and derivatives	C00311	Carbohydrate metabolism; Cancer: overview; Endocrine system	320-77-4	HMDB0000193	Nodiff
M173T52.pos	1.34412e+07	1.2684e+07	0.943666	-0.0836525	0.806714	0.950745	1.89154e+07	1.57903e+07	2.00614e+07	1.23429e+07	9.09322e+06	4.44407e+06	5.97792e+06	6.97537e+06	1.15861e+07	1.7344e+07	8.4719e+06	2.57487e+07	0.403104	Iminoarginine	173.092	51.7	172.096	0.322414	C6H12N4O2	[M+H]+			C21026				Nodiff
M174T281.pos	3.55624e+06	4.00872e+06	1.12724	0.172789	0.639992	0.89414	9.76633e+06	2.55357e+06	2.37027e+06	2.63447e+06	3.45386e+06	558938	1.42915e+06	7.56606e+06	2.0749e+06	7.74136e+06	2.89445e+06	2.3464e+06	0.265624	N-Acetylleucine	174.113	280.9	173.105	0.574341	C8H15NO3	[M+H]+	Carboxylic acids and derivatives	Amino acids, peptides, and analogues	C02710		1188-21-2	HMDB0011756	Nodiff
M174T301.neg	3.03177e+07	5.46472e+07	1.80248	0.849984	0.0705648	0.828374	3.67609e+07	3.5645e+07	4.15634e+07	2.13486e+07	3.94448e+07	7.14375e+06	6.59681e+07	4.21565e+07	8.76212e+07	2.89317e+07	4.27792e+07	6.04263e+07	1.74616	1H-Indole-3-acetamide	174.056	300.6	174.079	7.29646	C10H10N2O	[M]-	Indoles and derivatives	Indoles	C02693	Amino acid metabolism	879-37-8	HMDB0029739	Nodiff
M174T45.neg	1.59024e+06	2.11557e+06	1.33035	0.411808	0.549974	0.918925	828301	3.01219e+06	2.43768e+06	302267	2.48536e+06	475614	1.21999e+06	482377	2.05725e+06	3.05409e+06	5.03966e+06	840082	0.638388	N-Acetyl-L-aspartic acid	174.041	45.2	175.048	2.16041	C6H9NO5	[M-H]-	Carboxylic acids and derivatives	Amino acids, peptides, and analogues	C01042	Amino acid metabolism	997-55-7	HMDB0000812	Nodiff
M174T50.neg	3.81252e+07	2.90913e+07	0.763047	-0.390157	0.505926	0.913465	1.88315e+08	5.84732e+06	1.93898e+07	3.07077e+06	8.02339e+06	4.10502e+06	2.3175e+07	9.9218e+06	2.42251e+07	6.22561e+06	1.34517e+07	9.75488e+07	0.649403	Citrulline	174.089	49.8	175.096	0.43656	C6H13N3O3	[M-H]-	Carboxylic acids and derivatives	Amino acids, peptides, and analogues	C00327	Amino acid metabolism	372-75-8	HMDB0000904	Nodiff
M174T55_2.pos	1.23527e+06	1.09551e+06	0.886852	-0.173235	0.448396	0.819016	722431	1.03238e+06	1.82334e+06	1.13232e+06	1.68882e+06	1.01234e+06	895585	1.14792e+06	2.4995e+06	836058	472820	721147	0.539111	2-Oxoarginine	174.088	55.4	173.08	1.28671	C6H11N3O3	[M+H]+	Carboxylic acids and derivatives	Alpha-keto acids and derivatives	C03771	Amino acid metabolism	3715-10-04	HMDB0004225	Nodiff
M174T77.neg	8.21829e+06	5.01175e+06	0.609829	-0.713523	0.442151	0.903209	2.19945e+07	3.98626e+06	5.51072e+06	8.74652e+06	1.58241e+06	7.48933e+06	4.67877e+06	4.40093e+06	4.77322e+06	2.06495e+06	2.68708e+06	1.14656e+07	0.799845	Dehydroascorbate	173.962	77	174.016	11.2081	C6H6O6	[M]-			C05422	Carbohydrate metabolism; Metabolism of other amino acids	490-83-5		Nodiff
M175T281.pos	667211	734564	1.10095	0.138745	0.548826	0.861952	29862.2	1.01822e+06	175628	181876	1.35742e+06	1.24026e+06	1.12577e+06	315263	1.4988e+06	1.04487e+06	232884	189796	0.684327	Demethylated antipyrine	175.087	280.6	174.079	0.508045	C10H10N2O	[M+H]+	Azoles	Pyrazoles	C13008		89-25-8	HMDB0006240	Nodiff
M175T325.neg	4.3213e+06	4.75101e+06	1.09944	0.136768	0.825222	0.969101	9.0379e+06	3.6126e+06	5.15561e+06	3.5458e+06	2.6881e+06	1.88779e+06	2.92705e+06	1.48131e+06	5.87118e+06	3.74347e+06	5.79983e+06	8.68323e+06	0.232005	Guanidinosuccinic acid	174.953	324.8	175.059	8.50632	C5H9N3O4	[M]-	Carboxylic acids and derivatives	Amino acids, peptides, and analogues	C03139		6133-30-8	HMDB0003157	Nodiff
M175T47.pos	2.40049e+07	4.19332e+07	1.74686	0.804762	0.334295	0.759725	1.36857e+07	2.57709e+07	2.36983e+07	2.50612e+07	2.34956e+07	3.23178e+07	2.54779e+07	1.77241e+07	6.71769e+07	1.74948e+07	2.26333e+07	1.01092e+08	0.930951	L-Arginine	174.938	47	174.112	0.233621	C6H14N4O2	[M+H]+	Carboxylic acids and derivatives	Amino acids, peptides, and analogues	C00062	Cancer: overview; Membrane transport; Signal transduction; Digestive system; Neurodegenerative disease; Translation; Amino acid metabolism; Infectious disease: parasitic	74-79-3	HMDB0000517	Nodiff
M175T51.pos	1.27702e+07	1.62848e+07	1.27522	0.350743	0.0118429	0.386644	1.41176e+07	1.13087e+07	1.27094e+07	9.87905e+06	1.58557e+07	1.27509e+07	1.49315e+07	1.45428e+07	1.77157e+07	1.6434e+07	1.60875e+07	1.79973e+07	1.95608	N-Acetylornithine	175.108	51.4	174.1	0.0291394	C7H14N2O3	[M+H]+	Carboxylic acids and derivatives	Amino acids, peptides, and analogues	C00437	Amino acid metabolism	6205-08-9 / 2185-16-2	HMDB0003357	Up
M176T334.pos	2.33939e+06	569478	0.243431	-2.03842	0.70147	0.920122	1.17792e+07	268804	874660	77132.6	706950	329589	572247	1.08353e+06	172544	812636	632181	143733	0.475999	2-Isopropylmalic acid	176.071	334.2	176.069	0.0776216	C7H12O5	[M]+	Fatty Acyls	Fatty acids and conjugates	C02504	Carbohydrate metabolism; Amino acid metabolism	3237-44-3	HMDB0000402	Nodiff
M177T171.pos	1.53106e+07	1.49878e+07	0.978919	-0.030738	0.965503	0.990429	1.58049e+07	1.15202e+07	2.20976e+07	1.47016e+07	9.72351e+06	1.80157e+07	1.09754e+07	1.63543e+07	2.07356e+07	1.33975e+07	1.24873e+07	1.59769e+07	0.0652533	N-Formyl-L-methionine	176.97	170.5	177.046	10.1334	C6H11NO3S	[M]+	Carboxylic acids and derivatives	Amino acids, peptides, and analogues	C03145	Amino acid metabolism	4289-98-9	HMDB0001015	Nodiff
M177T44.neg	1.79128e+06	2.98477e+06	1.66628	0.73663	0.179702	0.850745	907329	2.01065e+06	992019	3.12782e+06	892114	2.81772e+06	3.63706e+06	4.15786e+06	4.16876e+06	1.59662e+06	3.47149e+06	876800	1.27442	Pyrophosphate	176.935	44.3	177.943	2.26071	H4P2O7	[M-H]-	Non-metal oxoanionic compounds	Non-metal pyrophosphates	C00013	Energy metabolism; Neurodegenerative disease	14000-31-8/2466-09-3	HMDB0000250	Nodiff
M178T67.neg	1.68711e+08	8.26997e+07	0.490185	-1.0286	0.180271	0.850745	4.74084e+08	1.15435e+08	1.13666e+08	1.2383e+08	1.02627e+08	8.26242e+07	7.94326e+07	1.10197e+08	1.44512e+08	5.63358e+07	3.35117e+06	1.0237e+08	1.3085	Hippuric acid	178.05	67.3	179.058	0.700318	C9H9NO3	[M-H]-	Benzene and substituted derivatives	Benzoic acids and derivatives	C01586	Amino acid metabolism	495-69-2	HMDB0000714	Nodiff
M179T51.neg	1.18981e+08	1.3419e+08	1.12783	0.173546	0.341887	0.886396	3.44786e+08	6.2558e+07	8.48443e+07	8.19388e+07	1.02001e+08	3.77583e+07	1.09464e+08	1.17722e+08	1.65128e+08	9.03251e+07	1.03449e+08	2.19051e+08	0.952146	D-Fructose	179.056	51.2	180.063	0.134036	C6H12O6	[M-H]-			C00095	Endocrine and metabolic disease; Membrane transport; Sensory system; Digestive system; Carbohydrate metabolism	57-48-7		Nodiff
M180T62.neg	2.64228e+08	2.24774e+08	0.85068	-0.233311	0.856428	0.975927	3.23848e+08	4.71243e+07	7.25243e+07	7.70724e+07	1.04277e+09	2.20313e+07	5.8613e+07	2.99415e+08	4.28042e+08	2.98083e+07	4.20599e+07	4.90703e+08	0.225244	L-Tyrosine	180.066	62.4	181.074	1.24399	C9H11NO3	[M-H]-	Carboxylic acids and derivatives	Amino acids, peptides, and analogues	C00082	Cancer: overview; Metabolism of cofactors and vitamins; Nervous system; Digestive system; Endocrine system; Neurodegenerative disease; Translation; Amino acid metabolism; Substance dependence	60-18-4	HMDB0000158	Nodiff
M180T689.neg	1.15093e+07	1.35505e+07	1.17736	0.235554	0.639656	0.937081	1.53415e+07	1.69968e+07	8.30318e+06	5.17227e+06	5.44117e+06	1.78006e+07	1.09735e+07	1.66418e+07	3.75641e+06	1.40305e+07	1.3684e+07	2.2217e+07	0.395276	Theobromine	179.989	688.6	180.065	7.81731	C7H8N4O2	[M]-	Imidazopyrimidines	Purines and purine derivatives	C07480	Biosynthesis of other secondary metabolites	83-67-0	HMDB0002825	Nodiff
M180T83.neg	5.96819e+06	8.55867e+06	1.43405	0.520093	0.300795	0.881918	3.59037e+06	2.18316e+06	7.17789e+06	2.44748e+06	6.12651e+06	1.42837e+07	5.02494e+06	1.3053e+07	1.24984e+07	1.29036e+07	3.07567e+06	4.79638e+06	0.965626	Beta-Tyrosine	180.067	82.7	181.074	0.133284	C9H11NO3	[M-H]-	Benzene and substituted derivatives	1-hydroxy-2-unsubstituted benzenoids	C04368	Amino acid metabolism		HMDB0003831	Nodiff
M181T64.pos	7.28165e+06	1.03199e+07	1.41725	0.503096	0.355414	0.772662	1.86662e+07	6.51433e+06	1.12919e+06	8.58847e+06	8.37015e+06	421609	3.00638e+06	2.49127e+07	5.8436e+06	1.7134e+07	6.38554e+06	4.6374e+06	0.745088	Dulcin	181.097	63.8	180.09	1.10438	C9H12N2O2	[M+H]+	Benzene and substituted derivatives	N-phenylureas	C19415		150-69-6	HMDB0032565	Nodiff
M183T184.pos	1.06434e+08	1.15313e+08	1.08342	0.115595	0.454336	0.820997	1.02193e+08	8.37365e+07	1.43441e+08	1.12791e+08	9.40107e+07	1.02431e+08	1.01785e+08	1.27598e+08	8.82217e+07	1.08788e+08	1.18441e+08	1.47041e+08	0.509582	2-Hydroxy-3-(4-hydroxyphenyl)propanoic acid	182.983	183.6	182.058	10.8166	C9H10O4	[M+H]+			C03672		6482-98-0	HMDB0000755	Nodiff
M183T252.neg	6.69472e+06	7.56896e+06	1.13059	0.177071	0.461548	0.903209	6.08579e+06	7.55846e+06	8.38914e+06	6.48404e+06	5.12422e+06	6.52669e+06	9.50798e+06	4.83171e+06	8.15144e+06	9.76364e+06	7.40119e+06	5.75781e+06	0.725537	2,4-Dinitrophenol	183.005	252.3	184.012	3.14745	C6H4N2O5	[M-H]-	Textile Chemicals/Auxiliary/Dyes; Pesticides/Herbicides; Industrial Chemicals; Endogenous Metabolites		C02496		51-28-5		Nodiff
M183T290.pos	2.96114e+07	2.78276e+07	0.939759	-0.089637	0.869662	0.968435	1.46207e+07	3.15634e+07	3.74785e+07	3.00626e+07	3.29532e+07	3.09902e+07	2.65668e+07	3.00143e+07	2.58767e+07	2.86857e+07	2.64783e+07	2.93437e+07	0.0844182	Sorbitol	182.982	289.8	182.079	16.7063	C6H14O6	[M+H]+	Organooxygen compounds	Carbohydrates and carbohydrate conjugates	C00794	Carbohydrate metabolism; Membrane transport	50-70-4	HMDB0000247	Nodiff
M183T329.pos	1.2863e+07	1.93652e+07	1.50549	0.590234	0.0771744	0.521475	1.28984e+07	1.29716e+07	1.14257e+07	1.30088e+07	1.09543e+07	1.59194e+07	2.03389e+07	3.15482e+07	1.80014e+07	1.52807e+07	2.12556e+07	9.76635e+06	1.58483	Se-Methylselenocysteine	182.982	329.3	182.98	14.209	C4H9NO2Se	[M]+	Carboxylic acids and derivatives	Amino acids, peptides, and analogues	C05689	Metabolism of other amino acids	26046-90-2 / 2574-71-2 / NA	HMDB0004113	Nodiff
M183T687.pos	4.67962e+07	9.0833e+07	1.94103	0.956824	0.0138977	0.395931	2.60329e+07	6.38796e+07	5.3216e+07	5.9055e+07	5.21141e+07	2.64797e+07	7.71416e+07	1.6746e+08	5.78057e+07	8.88791e+07	6.89994e+07	8.47116e+07	1.8309	Homovanillic acid	182.983	687	182.058	11.1629	C9H10O4	[M+H]+	Phenols	Methoxyphenols	C05582	Amino acid metabolism; Nervous system	306-08-1	HMDB0000118	Up
M184T51.pos	6.0756e+07	6.68474e+07	1.10026	0.137844	0.431107	0.809445	6.80262e+07	7.4977e+07	5.08931e+07	4.16637e+07	7.43832e+07	5.45926e+07	6.12732e+07	7.02121e+07	6.86173e+07	6.01095e+07	5.07614e+07	9.01106e+07	0.646258	Phosphorylcholine	184.073	50.5	184.074	0.82723	C5H15NO4P	[M+H]+	Organonitrogen compounds	Quaternary ammonium salts	C00588	Lipid metabolism; Cancer: overview	3616-04-4 / 107-73-3	HMDB0001565	Nodiff
M187T333.pos	1.06832e+07	1.08834e+07	1.01874	0.0267828	0.869672	0.968435	1.94671e+07	8.57521e+06	6.74784e+06	1.19523e+07	6.82747e+06	1.05295e+07	6.92411e+06	9.74361e+06	1.23308e+07	1.16535e+07	7.0928e+06	1.75557e+07	0.0638313	Undecanoic acid	186.953	333.1	186.162	15.6043	C11H22O2	[M+H]+	Fatty Acyls	Fatty acids and conjugates	C17715		112-37-8	HMDB0000947	Nodiff
M187T52.neg	1.31052e+07	9.00694e+06	0.687281	-0.541029	0.0767139	0.828672	1.06916e+07	1.71999e+07	1.36379e+07	1.18636e+07	1.21708e+07	1.30673e+07	8.41438e+06	1.20031e+07	1.13084e+07	3.24829e+06	8.82392e+06	1.02435e+07	1.67411	Azelaic acid	187.098	52.1	188.105	2.00964	C9H16O4	[M-H]-	Fatty Acyls	Fatty acids and conjugates	C08261		123-99-9	HMDB0000784	Nodiff
M187T60.pos	2.32681e+07	5.12647e+07	2.20322	1.13961	0.0737492	0.512944	2.54879e+07	1.32772e+07	1.26651e+07	4.57453e+07	3.17654e+07	1.06678e+07	1.05247e+07	5.05838e+07	6.09163e+07	8.7536e+07	4.41113e+07	5.39163e+07	1.45507	5-Guanidino-3-methyl-2-oxopentanoate	187.108	59.7	187.096	0.0228995	C7H13N3O3	[M]+			C20234				Nodiff
M188T168.pos	3.89226e+08	6.1415e+08	1.57788	0.657983	0.126708	0.593652	2.0707e+08	5.03883e+08	8.76613e+07	4.64575e+08	4.57886e+08	6.14279e+08	3.36036e+08	5.47113e+08	9.10561e+08	5.80224e+08	4.94817e+08	8.16146e+08	1.44091	3-Indoleacrylate	188.071	168	187.063	0.00395492	C11H9NO2	[M+H]+			C21283				Nodiff
M188T184.pos	7.51549e+08	9.01386e+08	1.19937	0.262279	0.303437	0.741535	8.02204e+08	8.18054e+08	6.48268e+08	8.64905e+08	6.05425e+08	7.70436e+08	7.63242e+08	5.0087e+08	1.0514e+09	8.79098e+08	1.06229e+09	1.15141e+09	0.896911	N-Alpha-acetyllysine	188.071	183.5	188.116	0.352819	C8H16N2O3	[M]+	Carboxylic acids and derivatives	Amino acids, peptides, and analogues	C12989		1946-82-3	HMDB0000446	Nodiff
M188T50.pos	2.18878e+07	2.14528e+07	0.980126	-0.0289601	0.842788	0.959623	1.76989e+07	2.65135e+07	2.10706e+07	2.02308e+07	2.53648e+07	2.04479e+07	2.1902e+07	2.20315e+07	1.86375e+07	1.99294e+07	2.04286e+07	2.57876e+07	0.172425	(Z)-But-1-ene-1,2,4-tricarboxylate	188.035	50.3	188.032	16.4863	C7H8O6	[M]+	Carboxylic acids and derivatives	Tricarboxylic acids and derivatives	C04002			HMDB0060320	Nodiff
M189T45.pos	2.32259e+08	3.15452e+08	1.35819	0.441687	0.197933	0.672378	6.71914e+08	1.98843e+08	2.2118e+08	6.33508e+07	1.51888e+08	8.63788e+07	3.38994e+08	2.25858e+08	3.33207e+08	1.69663e+08	2.45255e+08	5.79737e+08	0.981721	N6,N6,N6-Trimethyl-L-lysine	189.16	45.2	188.153	1.18418	C9H20N2O2	[M+H]+	Carboxylic acids and derivatives	Amino acids, peptides, and analogues	C03793	Amino acid metabolism	c("19253-88-4", "55528-53-5")	HMDB0001325	Nodiff
M189T56_2.pos	9.5223e+07	5.53907e+07	0.581694	-0.781666	0.20339	0.676719	2.05792e+08	6.72582e+07	4.60685e+07	4.76279e+07	5.38004e+07	1.50791e+08	2.8959e+07	5.40609e+07	7.98659e+07	6.10393e+07	8.48738e+07	2.35455e+07	1.04674	N6-Acetyl-L-lysine	189.123	56.3	188.116	0.000387763	C8H16N2O3	[M+H]+	Carboxylic acids and derivatives	Amino acids, peptides, and analogues	C02727	Amino acid metabolism	692-04-6	HMDB0000206	Nodiff
M189T88.pos	1.56993e+07	1.80613e+07	1.15045	0.202201	0.388243	0.788392	3.95292e+07	1.02545e+07	1.28315e+07	1.60901e+07	9.39872e+06	6.09156e+06	1.76495e+07	1.50315e+07	2.31388e+07	1.07696e+07	1.2957e+07	2.88212e+07	0.66142	Glycylleucine	189.124	88	188.116	0.655656	C8H16N2O3	[M+H]+	Carboxylic acids and derivatives	Amino acids, peptides, and analogues	C02155		869-19-2	HMDB0000759	Nodiff
M190T61.pos	4.27262e+06	4.69859e+06	1.0997	0.137107	0.799408	0.94847	9.06145e+06	3.14595e+06	6.2648e+06	3.22671e+06	2.01853e+06	1.91827e+06	5.44951e+06	2.00484e+06	5.49931e+06	1.94882e+06	3.40415e+06	9.8849e+06	0.113619	Homocitrulline	190.108	61.3	189.111	0.0986939	C7H15N3O3	[M+H]+	Carboxylic acids and derivatives	Amino acids, peptides, and analogues	C02427		1190-49-4	HMDB0000679	Nodiff
M191T41.neg	1.48927e+08	9.02524e+07	0.60602	-0.722563	0.14619	0.850047	2.25008e+08	7.75313e+07	7.13809e+07	2.41884e+08	1.92723e+08	8.50322e+07	6.61196e+07	2.02631e+08	5.72e+07	1.14817e+08	4.77925e+07	5.29546e+07	1.3699	Citric acid	191.02	40.6	192.027	0.125641	C6H8O7	[M-H]-	Carboxylic acids and derivatives	Tricarboxylic acids and derivatives	C00158	Cancer: overview; Sensory system; Endocrine system; Carbohydrate metabolism; Amino acid metabolism	77-92-9 / 126-44-3	HMDB0000094	Nodiff
M191T47.neg	1.68006e+08	1.0711e+08	0.637538	-0.649417	0.767655	0.957947	6.57495e+08	1.74522e+07	1.96766e+08	4.21418e+07	4.98476e+07	4.43333e+07	1.11642e+08	6.1719e+07	1.05249e+08	4.19547e+07	8.60832e+07	2.36013e+08	0.275422	Quinate	191.056	46.6	192.063	0.649024	C7H12O6	[M-H]-			C00296	Amino acid metabolism	77-95-2		Nodiff
M191T49.pos	1.40816e+07	1.45706e+07	1.03473	0.0492517	0.359288	0.774827	1.25029e+07	1.45852e+07	1.38156e+07	1.39182e+07	1.44672e+07	1.52006e+07	1.4389e+07	1.516e+07	1.34895e+07	1.49388e+07	1.37941e+07	1.56524e+07	0.797575	Diaminopimelic acid	191.04	48.7	190.095	25.5229	C7H14N2O4	[M+H]+	Carboxylic acids and derivatives	Amino acids, peptides, and analogues	C00666		583-93-7 / 14289-34-0 / NA	HMDB0001370	Nodiff
M192T141.neg	2.47006e+06	8.87408e+06	3.59266	1.84505	0.0801768	0.82983	2.59345e+06	3.22606e+06	6.30865e+06	174822	297255	2.22012e+06	1.12989e+07	637643	1.57494e+07	3.89334e+06	7.88344e+06	1.37818e+07	1.60009	Phenylacetylglycine	192.067	140.6	193.074	3.5196	C10H11NO3	[M-H]-	Carboxylic acids and derivatives	Amino acids, peptides, and analogues	C05598	Amino acid metabolism	500-98-1	HMDB0000821	Nodiff
M192T417.pos	7.27233e+06	6.44259e+06	0.885904	-0.174778	0.966732	0.990686	1.22751e+06	8.43932e+06	9.25808e+06	8.26594e+06	7.4597e+06	8.98345e+06	5.41957e+06	5.50647e+06	5.7765e+06	8.71459e+06	8.88655e+06	4.35185e+06	0.132913	N,N-Diethyl-m-toluamide	192.138	417.5	191.131	0.0270969	C12H17NO	[M+H]+			C10935		134-62-3		Nodiff
M193T487.pos	9.24915e+06	1.15556e+07	1.24937	0.321197	0.289585	0.733753	8.61631e+06	1.18295e+07	1.57025e+07	3.17706e+06	1.26033e+07	3.56611e+06	1.42618e+07	1.46233e+07	1.49788e+07	7.7146e+06	9.87581e+06	7.87921e+06	0.892994	Jasmonic acid	193.123	487.4	210.126	22.4417	C12H18O3	[M+H-H2O]+	Fatty Acyls	Lineolic acids and derivatives	C08491	Lipid metabolism	59366-47-1/6894-38-8	HMDB0032797	Nodiff
M194T275.pos	9.63488e+06	4.69124e+06	0.486902	-1.0383	0.853376	0.962692	4.10649e+07	9.45052e+06	2.50292e+06	315811	4.43559e+06	39518.9	278742	1.52654e+07	305685	9.52862e+06	2.31932e+06	449629	0.318112	Sequoyitol	194.081	275.3	194.079	0.622927	C7H14O6	[M]+	Alcohols and polyols	Cyclic alcohols and derivatives	C03365		523-92-2	HMDB0031449	Nodiff
M194T291.pos	2.8982e+07	3.32644e+07	1.14776	0.198821	0.00171158	0.231503	2.61627e+07	3.08033e+07	2.80149e+07	2.98802e+07	2.9117e+07	2.99142e+07	3.1724e+07	3.18973e+07	3.23892e+07	3.48957e+07	3.25524e+07	3.61281e+07	2.17636	3,4-Methylenedioxyamphetamine	194.116	290.9	193.11	0.41206	C11H15NO2	[M+H]+	Benzodioxoles		C07577		4764-17-4 / 42542-10-9	HMDB0041931	Up
M195T100.pos	5.80563e+07	2.47869e+07	0.426947	-1.22787	0.932533	0.9829	2.96034e+08	2.58219e+06	2.53402e+07	2.7382e+06	2.09998e+07	643712	7.99361e+07	2.1628e+07	329989	6.04672e+06	3.78563e+07	2.92455e+06	0.212686	Dolichotheline	195.123	100.4	195.137	0.909372	C10H17N3O	[M]+			C16696		23100-08-5		Nodiff
M195T240.pos	836705	671540	0.8026	-0.317247	0.533872	0.856634	157143	777918	851544	1.00896e+06	1.25925e+06	965410	266211	314703	1.03284e+06	229913	941420	1.24415e+06	0.387602	Caffeine	195.088	239.6	194.08	0.00133404	C8H10N4O2	[M+H]+	Imidazopyrimidines	Purines and purine derivatives	C07481	Biosynthesis of other secondary metabolites	1958-08-02	HMDB0001847	Nodiff
M195T381.pos	3.36135e+07	9.14237e+06	0.271985	-1.8784	0.686609	0.912992	1.62414e+08	4.60833e+06	1.73678e+07	6.14606e+06	8.00772e+06	3.13731e+06	5.89299e+06	1.44338e+07	5.95174e+06	1.05552e+07	8.95701e+06	9.06355e+06	0.529943	Neocnidilide	195.138	381.2	194.131	0.12299	C12H18O2	[M+H]+	Lactones	Gamma butyrolactones	C17002		4567-33-3	HMDB0034450	Nodiff
M195T487.pos	1.80241e+08	1.05191e+08	0.583614	-0.776914	0.112548	0.575268	1.98832e+08	2.6524e+08	2.77328e+08	1.24745e+08	1.5246e+08	6.28435e+07	5.6469e+07	6.36942e+07	1.05673e+08	1.43031e+08	8.96658e+07	1.72616e+08	1.45898	3-Methyl-L-tyrosine	195.102	486.7	195.089	0.0192185	C10H13NO3	[M]+			C20800				Nodiff
M195T71.pos	5.91629e+07	5.43836e+07	0.919219	-0.12152	0.484209	0.836727	7.04465e+07	7.04462e+07	7.38269e+07	4.92462e+07	5.00906e+07	4.09207e+07	2.78297e+07	3.79322e+07	4.47745e+07	6.99322e+07	3.97663e+07	1.06067e+08	0.794094	D-Glucuronic Acid	195.123	70.9	194.043	1.08905	C6H10O7	[M+H]+			C00191	Carbohydrate metabolism	655612-3		Nodiff
M196T58_1.neg	6.86269e+06	8.189e+06	1.19326	0.254912	0.428764	0.903209	1.74896e+06	5.10677e+06	7.59573e+06	4.77686e+06	1.04563e+07	1.14915e+07	6.93371e+06	7.12386e+06	5.0065e+06	5.29428e+06	1.37276e+07	1.1048e+07	0.777819	L-Dopa	196	57.8	197.069	6.82447	C9H11NO4	[M-H]-	Carboxylic acids and derivatives	Amino acids, peptides, and analogues	C00355	Nervous system; Endocrine system; Neurodegenerative disease; Amino acid metabolism; Substance dependence	59-92-7	HMDB0000181	Nodiff
M198T49.pos	1.32899e+07	8.21152e+07	6.17875	2.62732	0.17461	0.652638	1.05336e+07	1.79459e+07	2.27318e+07	1.3228e+07	9.6251e+06	5.67512e+06	3.64038e+07	1.38883e+07	3.96022e+08	1.02692e+07	1.55374e+07	2.05705e+07	1.27497	N-Acetylhistidine	198.085	49.4	197.08	11.49	C8H11N3O3	[M+H]+	Carboxylic acids and derivatives	Amino acids, peptides, and analogues	C02997		2497-02-01	HMDB0032055	Nodiff
M198T640.pos	2.26861e+07	3.00548e+07	1.32481	0.405786	0.163982	0.639345	2.22252e+07	1.5392e+07	4.9788e+07	1.92305e+07	2.0161e+07	9.32011e+06	3.29147e+07	1.84715e+07	3.60924e+07	2.48792e+07	2.98941e+07	3.80771e+07	1.10091	Vanillylmandelic acid	198.185	640.2	198.053	1.67747	C9H10O5	[M]+	Phenols	Methoxyphenols	C05584	Amino acid metabolism	1955-10-07	HMDB0000291	Nodiff
M199T528.neg	6.57383e+08	4.09195e+08	0.622461	-0.683944	0.155059	0.850745	7.46798e+08	7.50926e+08	6.62432e+08	4.96548e+08	1.07768e+09	2.09916e+08	2.63844e+08	2.50728e+08	4.04962e+08	7.79345e+08	2.68959e+08	4.87333e+08	1.30115	N-Acetylserotonin	199.17	527.6	218.106	6.17428	C12H14N2O2	[M-H2O-H]-	Indoles and derivatives	Hydroxyindoles	C00978	Amino acid metabolism	1210-83-9	HMDB0001238	Nodiff
M200T79.pos	1.55493e+08	1.93748e+08	1.24602	0.317331	0.576706	0.870903	8.17286e+06	2.89926e+07	7.33952e+08	5.25964e+07	3.79788e+07	7.12664e+07	3.95891e+07	7.04134e+07	8.95267e+08	5.09295e+07	5.19153e+07	5.43754e+07	0.565308	Dodecanoic acid	199.989	78.9	200.178	5.0834	C12H24O2	[M]+	Fatty Acyls	Fatty acids and conjugates	C02679	Lipid metabolism	143-07-7	HMDB0000638	Nodiff
M203T49.pos	1.96318e+08	1.1006e+08	0.560619	-0.834908	0.711472	0.923382	8.99851e+08	4.03715e+07	8.11534e+07	5.45655e+07	8.84425e+07	1.35252e+07	8.56046e+07	7.21922e+07	1.40821e+08	4.1192e+07	1.01223e+08	2.19325e+08	0.23323	Asymmetric dimethylarginine	203.15	48.5	202.143	0.00348515	C8H18N4O2	[M+H]+	Carboxylic acids and derivatives	Amino acids, peptides, and analogues	C03626		30315-93-6 / 220805-22-1	HMDB0001539	Nodiff
M204T288.pos	4.80742e+07	4.39299e+07	0.913794	-0.130059	0.95463	0.98849	1.6947e+08	2.95178e+07	3.46351e+07	9.63582e+06	4.41785e+07	1.00806e+06	5.20659e+06	1.11321e+08	5.0196e+06	6.84279e+07	6.57583e+07	7.8464e+06	0.0955769	N5-(L-1-Carboxyethyl)-L-ornithine	204.123	287.8	204.111	1.05236	C8H16N2O4	[M]+			C04210				Nodiff
M204T59.pos	5.3237e+08	5.70245e+08	1.07114	0.0991516	0.311997	0.746387	1.87991e+09	1.78027e+08	3.79906e+08	4.37449e+08	2.18055e+08	1.00879e+08	3.55797e+08	6.34403e+08	5.63515e+08	4.33466e+08	3.89611e+08	1.04468e+09	0.751968	O-Acetylcarnitine	204.123	59.1	204.124	0.703514	C9H18NO4	[M+H]+			C02571	Endocrine and metabolic disease	5080-50-2		Nodiff
M205T184.pos	1.24796e+09	7.99021e+08	0.640261	-0.643268	0.224268	0.694635	1.82558e+09	1.81617e+09	1.71835e+09	7.34703e+08	1.00984e+09	3.83127e+08	2.76019e+08	4.68572e+08	1.63405e+09	7.74443e+08	4.59856e+08	1.18118e+09	1.11007	L-Tryptophan	205.097	183.5	204.09	0.246047	C11H12N2O2	[M+H]+	Indoles and derivatives	Indolyl carboxylic acids and derivatives	C00078	Cancer: overview; Nervous system; Digestive system; Translation; Amino acid metabolism; Infectious disease: parasitic	73-22-3	HMDB0000929	Nodiff
M205T550.neg	9.22866e+06	9.62889e+06	1.04337	0.0612489	0.969941	0.994074	1.04064e+07	1.20188e+07	1.00723e+07	6.36462e+06	7.42463e+06	9.08508e+06	6.96986e+06	1.69161e+07	6.36126e+06	9.51354e+06	7.5336e+06	1.0479e+07	0.0063964	Methyl jasmonate	205.16	549.6	224.141	2.78864	C13H20O3	[M-H2O-H]-	Fatty Acyls	Lineolic acids and derivatives	C11512	Lipid metabolism	1211-29-6 / 39924-52-2	HMDB0036583	Nodiff
M206T307.pos	1.31922e+06	1.26476e+06	0.958719	-0.0608206	0.77669	0.941118	1.72086e+06	968441	1.23911e+06	1.43322e+06	1.48324e+06	1.07044e+06	1.18448e+06	1.22703e+06	1.10334e+06	1.20117e+06	1.2833e+06	1.58922e+06	0.331989	Indolelactic acid	206.081	307.1	205.074	0.00136939	C11H11NO3	[M+H]+	Indoles and derivatives	Indolyl carboxylic acids and derivatives	C02043		1821-52-9	HMDB0000671	Nodiff
M208T297.pos	3.01097e+06	3.25513e+06	1.08109	0.112485	0.297	0.737943	2.56746e+06	3.52477e+06	3.39038e+06	3.01757e+06	2.74304e+06	2.8226e+06	2.91563e+06	3.33412e+06	2.84383e+06	3.77159e+06	2.98898e+06	3.67663e+06	0.741532	N-Acetyl-L-phenylalanine	208.097	297.2	207.089	0.849577	C11H13NO3	[M+H]+	Carboxylic acids and derivatives	Amino acids, peptides, and analogues	C03519	Amino acid metabolism	2018-61-3	HMDB0000512	Nodiff
M209T499.pos	1.06619e+07	1.26116e+07	1.18287	0.242297	0.027825	0.439725	1.26793e+07	1.01527e+07	1.00138e+07	1.03468e+07	1.05122e+07	1.02664e+07	1.40434e+07	1.48897e+07	1.2103e+07	1.26183e+07	1.1324e+07	1.06915e+07	1.69949	Ethirimol	209.154	499.4	209.153	0.0289345	C11H19N3O	[M]+			C18828		23947-60-6		Up
M209T51.neg	1.3381e+08	5.55774e+07	0.415346	-1.26762	0.111138	0.833351	4.31334e+08	8.91396e+07	7.85584e+07	5.58033e+07	8.41018e+07	6.39221e+07	4.02384e+07	7.32859e+07	6.80135e+07	6.20899e+07	4.62116e+07	4.3625e+07	1.55446	Sedoheptulose	209.067	51.5	210.074	1.32015	C7H14O7	[M-H]-	Organooxygen compounds	Carbohydrates and carbohydrate conjugates	C02076		3019-74-7	HMDB0003219	Nodiff
M211T500.pos	4.88927e+06	6.31388e+06	1.29137	0.368908	0.202432	0.67614	6.66152e+06	3.47917e+06	5.88445e+06	5.12756e+06	4.03714e+06	4.14577e+06	7.43222e+06	7.10181e+06	3.6248e+06	5.56495e+06	9.31775e+06	4.84174e+06	0.975665	(+)-7-Isojasmonic acid	211.133	499.8	210.126	0.0254733	C12H18O3	[M+H]+			C16317	Lipid metabolism	62653-85-4		Nodiff
M215T329.neg	1.29966e+06	1.71221e+06	1.31742	0.397719	0.206885	0.858164	1.01178e+06	1.22887e+06	3.42153e+06	1.01909e+06	529665	587045	2.10663e+06	867559	1.63213e+06	2.18255e+06	1.22278e+06	2.26159e+06	1.21892	12-Hydroxydodecanoic acid	215.166	329.4	216.173	2.67701	C12H24O3	[M-H]-	Hydroxy acids and derivatives	Medium-chain hydroxy acids and derivatives	C08317		505-95-3	HMDB0002059	Nodiff
M215T67.pos	2.58943e+07	2.84385e+07	1.09825	0.135209	0.13747	0.607262	2.17476e+07	2.65511e+07	2.45289e+07	3.06249e+07	2.94577e+07	2.24559e+07	2.83811e+07	2.91093e+07	2.83444e+07	2.88605e+07	2.72513e+07	2.86844e+07	1.3935	Dethiobiotin	215.139	66.8	214.132	0.0002837	C10H18N2O3	[M+H]+	Fatty Acyls	Fatty acids and conjugates	C01909	Metabolism of cofactors and vitamins	533-48-2	HMDB0003581	Nodiff
M216T77.pos	1.4658e+07	1.60728e+07	1.09652	0.132937	0.526345	0.853304	4.69291e+07	6.24761e+06	1.717e+07	7.31989e+06	6.78719e+06	3.49417e+06	1.07306e+07	3.55539e+07	5.48407e+06	1.82396e+07	1.86431e+07	7.78572e+06	0.375541	Tetrahydroharmine	216.123	77.1	216.126	0.574871	C13H16N2O	[M]+			C09243		17019-01-1		Nodiff
M217T309.pos	5.15646e+06	4.70931e+06	0.913284	-0.130864	0.681334	0.91024	1.77911e+07	2.70078e+06	2.58103e+06	3.9923e+06	3.36468e+06	508878	1.38425e+06	6.98984e+06	2.5657e+06	7.82011e+06	2.54685e+06	6.94912e+06	0.197885	N-a-Acetylcitrulline	217.107	309.1	217.106	0.521162	C8H15N3O4	[M]+	Carboxylic acids and derivatives	Amino acids, peptides, and analogues	C15532	Amino acid metabolism	33965-42-3	HMDB0000856	Nodiff
M217T60.pos	1.15691e+07	1.41802e+07	1.2257	0.293603	0.417289	0.803246	2.00096e+07	8.13125e+06	1.14939e+07	1.49333e+07	7.86611e+06	6.98062e+06	1.15523e+07	1.07755e+07	1.99167e+07	7.74e+06	1.14508e+07	2.36461e+07	0.662776	N-[(2S)-2-Amino-2-carboxyethyl]-L-glutamate	217.082	60.1	234.085	19.5045	C8H14N2O6	[M+H-H2O]+			C21559				Nodiff
M217T86.pos	5.08799e+06	4.56115e+06	0.896454	-0.157699	0.15289	0.629342	5.32169e+06	4.70766e+06	5.67761e+06	5.19272e+06	5.02485e+06	4.60342e+06	5.05495e+06	4.21996e+06	5.11762e+06	4.50583e+06	5.08594e+06	3.38261e+06	1.17366	beta-Alanyl-L-lysine	217.155	85.5	217.143	0.0696185	C9H19N3O3	[M]+	Peptidomimetics	Hybrid peptides	C05341	Metabolism of other amino acids		HMDB0060442	Nodiff
M218T67.pos	4.57545e+07	2.78554e+07	0.608802	-0.715955	0.439383	0.813868	3.13326e+06	6.11184e+07	5.56248e+07	4.31259e+07	4.98225e+07	6.17024e+07	3.0311e+07	2.6049e+07	2.25687e+07	4.81203e+07	3.8841e+07	1.24261e+06	0.560494	Propionylcarnitine	218.139	66.8	217.131	0.531368	C10H19NO4	[M+H]+	Fatty Acyls	Fatty acid esters	C03017		17298-37-2	HMDB0000824	Nodiff
M219T365.pos	6.53817e+06	8.30191e+06	1.26976	0.344558	0.186119	0.665451	2.12786e+06	7.37919e+06	7.57668e+06	7.28555e+06	7.51142e+06	7.34831e+06	8.00691e+06	7.89752e+06	8.44086e+06	8.8415e+06	8.67171e+06	7.95299e+06	1.28158	Capsidiol	219.174	364.6	236.178	2.28129	C15H24O2	[M+H-H2O]+	Prenol lipids	Sesquiterpenoids	C09627		37208-05-2	HMDB0002352	Nodiff
M219T62.pos	7.22777e+06	7.47078e+06	1.03362	0.0477093	0.593111	0.87669	6.8901e+06	7.93269e+06	8.90011e+06	6.50191e+06	6.11982e+06	7.02198e+06	7.05976e+06	7.14352e+06	7.49912e+06	7.70081e+06	6.68637e+06	8.73512e+06	0.30329	gamma-Glutamylalanine	219.097	62.2	NA	0.0053781	C7H11N2O5R	[M+H]+	Carboxylic acids and derivatives	Amino acids, peptides, and analogues	C03740	Metabolism of other amino acids	5875-41-2	HMDB0006248	Nodiff
M220T109.pos	2.29138e+07	4.74511e+07	2.07086	1.05023	0.260959	0.714637	5.95716e+06	1.92208e+06	8.87446e+07	4.03172e+06	2.84322e+07	8.39488e+06	4.8651e+07	5.40098e+07	6.03417e+06	6.53068e+06	1.58085e+07	1.53673e+08	0.895485	Pantothenic acid	220.118	109	219.111	0.563334	C9H17NO5	[M+H]+	Alcohols and polyols	Polyols	C00864	Metabolism of cofactors and vitamins; Metabolism of other amino acids; Digestive system	79-83-4 / 20938-62-9 / 137-08-6	HMDB0000210	Nodiff
M220T53.neg	1.77241e+07	3.14071e+07	1.772	0.825376	0.360788	0.886823	2.24798e+07	4.25771e+06	6.72893e+06	3.31834e+07	2.39308e+07	1.57642e+07	6.29228e+07	7.00659e+06	4.36315e+07	9.07006e+06	1.70787e+07	4.87329e+07	0.890594	N-Acetylmannosamine	220.083	52.8	221.09	2.61719	C8H15NO6	[M-H]-	Organooxygen compounds	Carbohydrates and carbohydrate conjugates	C00645	Carbohydrate metabolism	7772-94-3 / 3615-17-6	HMDB0001129	Nodiff
M221T522.neg	1.62678e+07	9.66374e+06	0.59404	-0.751369	0.704434	0.950332	6.67145e+07	7.78019e+06	5.2071e+06	1.04041e+07	6.79386e+06	707226	8.16313e+06	1.27625e+07	5.40249e+06	9.36769e+06	7.53607e+06	1.47506e+07	0.399326	N-Acetyl-D-glucosamine	221.155	521.8	221.09	2.72349	C8H15NO6	[M]-	Organooxygen compounds	Carbohydrates and carbohydrate conjugates	C00140	Carbohydrate metabolism; Membrane transport	7512-17-6	HMDB0000215	Nodiff
M224T392.pos	3.06978e+06	4.89712e+06	1.59526	0.673795	0.0510347	0.486018	2.529e+06	3.59275e+06	3.80889e+06	2.85062e+06	4.48306e+06	1.15439e+06	5.72625e+06	6.44561e+06	5.954e+06	3.72159e+06	3.98346e+06	3.55179e+06	1.61079	(2S)-Flavanone	224.092	391.5	224.084	0.443591	C15H12O2	[M]+			C02099		487-26-3		Nodiff
M224T41.pos	1.1564e+07	1.29392e+07	1.11892	0.162104	0.50257	0.844385	7.30507e+06	1.32496e+07	1.28243e+07	1.06993e+07	1.22422e+07	1.30635e+07	1.13619e+07	1.20576e+07	2.04702e+07	1.281e+07	1.1822e+07	9.11326e+06	0.748222	Hydroxykynurenine	223.99	41.4	224.08	7.77175	C10H12N2O4	[M]+	Organooxygen compounds	Carbonyl compounds	C02794		484-78-6 / 2147-61-7	HMDB0000732	Nodiff
M227T44.pos	2.79443e+07	1.69913e+07	0.60804	-0.717762	0.117739	0.580767	4.01218e+07	2.32777e+07	2.23474e+07	3.83397e+07	2.44642e+07	1.91154e+07	3.79964e+06	3.52244e+06	2.39453e+07	2.9099e+07	1.87229e+07	2.28585e+07	1.38802	Carnosine	227.114	44.2	226.107	0.880615	C9H14N4O3	[M+H]+	Peptidomimetics	Hybrid peptides	C00386	Amino acid metabolism; Metabolism of other amino acids	305-84-0	HMDB0000033	Nodiff
M227T491.pos	3.58752e+06	4.88378e+06	1.36132	0.445009	0.195612	0.672332	1.41865e+07	1.64786e+06	2.17015e+06	2.36829e+06	915352	236973	4.61884e+06	4.78315e+06	6.62256e+06	1.78672e+06	1.91676e+06	9.57464e+06	1.00481	Myristoleic acid	227.201	491.3	226.193	1.32042	C14H26O2	[M+H]+	Fatty Acyls	Fatty acids and conjugates	C08322		544-64-9/NA	HMDB0002000	Nodiff
M227T640_2.pos	2.23723e+07	1.73645e+07	0.776161	-0.365572	0.526342	0.853304	6.20869e+06	1.9783e+07	2.6826e+07	2.77257e+07	2.57939e+07	2.78963e+07	1.79118e+07	1.38015e+07	1.92254e+07	1.06905e+07	1.85313e+07	2.40265e+07	0.414461	Deoxycytidine	227.184	640.2	227.091	0.0275108	C9H13N3O4	[M]+	Pyrimidine nucleosides	Pyrimidine 2'-deoxyribonucleosides	C00881	Membrane transport; Nucleotide metabolism	951-77-9	HMDB0000014	Nodiff
M228T603.neg	9.02515e+07	7.7328e+07	0.856805	-0.222961	0.475676	0.903209	1.39555e+08	9.62734e+07	4.17883e+07	8.02136e+07	7.66707e+07	1.07008e+08	1.04175e+08	1.01185e+08	4.33071e+07	5.83469e+07	3.18599e+07	1.25094e+08	0.742653	Resveratrol	228.073	603	228.079	24.1151	C14H12O3	[M]-	Stilbenes		C03582	Aging	501-36-0	HMDB0003747	Nodiff
M228T649.pos	2.07024e+08	2.48756e+08	1.20158	0.264937	0.607081	0.882458	7.48319e+08	8.69305e+07	1.12237e+08	1.3247e+08	9.8941e+07	6.32458e+07	1.8228e+08	1.27676e+08	2.45348e+08	5.32578e+07	1.3249e+08	7.51486e+08	0.380272	Deoxyuridine	228.196	648.9	228.075	0.895414	C9H12N2O5	[M]+	Pyrimidine nucleosides	Pyrimidine 2'-deoxyribonucleosides	C00526	Membrane transport; Nucleotide metabolism	951-78-0	HMDB0000012	Nodiff
M229T167.pos	5.45479e+06	6.96651e+06	1.27714	0.352912	0.807443	0.951053	5.64796e+06	3.83029e+06	7.55777e+06	5.21824e+06	5.21616e+06	5.25834e+06	5.00159e+06	6.51867e+06	4.22446e+06	1.65242e+07	2.16965e+06	7.36049e+06	0.0633077	D-Octopine	229.119	167.3	246.133	29.9661	C9H18N4O4	[M+H-H2O]+	Carboxylic acids and derivatives	Amines	C04137	Amino acid metabolism; Membrane transport	34522-32-2		Nodiff
M229T246.neg	1.27428e+06	1.43929e+06	1.12949	0.175671	0.589977	0.926197	54240.9	1.58559e+06	1.4094e+06	799430	2.09232e+06	1.70471e+06	1.26761e+06	1.58448e+06	1.64987e+06	1.83861e+06	2.04815e+06	247025	0.565538	Dodecanedioic acid	229.144	246.3	230.152	0.97755	C12H22O4	[M-H]-	Fatty Acyls	Fatty acids and conjugates	C02678		693-23-2	HMDB0000623	Nodiff
M229T415_1.pos	8.07121e+06	6.06235e+06	0.751108	-0.412908	0.847932	0.960919	188633	9.67502e+06	1.17455e+07	1.06259e+07	7.27464e+06	8.91762e+06	5.44873e+06	4.51548e+06	5.37549e+06	8.37114e+06	9.4804e+06	3.18287e+06	0.275283	Myristic acid	229.18	415.3	228.209	3.53097	C14H28O2	[M+H]+	Fatty Acyls	Fatty acids and conjugates	C06424	Lipid metabolism	544-63-8	HMDB0000806	Nodiff
M229T50.pos	1.48461e+07	1.20884e+07	0.814246	-0.296464	0.323549	0.754534	2.21719e+07	4.89535e+06	1.89929e+07	8.79199e+06	1.56283e+07	1.8596e+07	2.99299e+06	1.7161e+07	5.65422e+06	3.46116e+07	3.37945e+06	8.73091e+06	0.962869	L-N2-(2-Carboxyethyl)arginine	229.129	49.9	246.133	14.9874	C9H18N4O4	[M+H-H2O]+	Carboxylic acids and derivatives	Amines	C06655				Nodiff
M230T417.pos	4.31947e+06	6.10925e+06	1.41435	0.500142	0.231805	0.697876	346085	5.6778e+06	3.82768e+06	4.47276e+06	5.40342e+06	6.18906e+06	5.80401e+06	4.80278e+06	7.96506e+06	5.24318e+06	5.28051e+06	7.55993e+06	1.19513	D-Ribose 5-phosphate	230.248	417.3	230.019	0.615421	C5H11O8P	[M]+	Organooxygen compounds	Carbohydrates and carbohydrate conjugates	C00117	Metabolism of cofactors and vitamins; Metabolism of other amino acids; Endocrine system; Carbohydrate metabolism; Nucleotide metabolism	3615-55-2 / 4300-28-1 / 4151-19-3 / 62746-84-3	HMDB0001548	Nodiff
M231T59.pos	2.96025e+07	1.66487e+07	0.562409	-0.830309	0.492384	0.840077	9.53996e+07	2.29689e+07	2.17177e+07	1.29349e+07	1.65649e+07	8.02917e+06	1.31743e+07	2.78739e+07	1.25562e+07	1.58368e+07	1.36092e+07	1.68419e+07	0.775351	N-Acetyl-L-2-amino-6-oxopimelate	231.098	58.8	231.074	2.15024	C9H13NO6	[M]+			C05539				Nodiff
M232T120.pos	2.51058e+07	2.93052e+07	1.16727	0.223139	0.162134	0.636623	1.89595e+07	2.43241e+07	2.08517e+07	3.46723e+07	2.41515e+07	2.76756e+07	3.86395e+07	2.97478e+07	2.85263e+07	2.71918e+07	2.45034e+07	2.72228e+07	1.29421	Butyryl-L-carnitine	232.155	120.1	231.147	0.000456269	C11H21NO4	[M+H]+			C02862		25576-40-3	HMDB02013	Nodiff
M234T477.pos	4.40761e+06	4.88198e+06	1.10763	0.14747	0.209501	0.68133	3.26477e+06	4.58411e+06	3.49573e+06	4.74963e+06	5.15216e+06	5.19925e+06	5.0249e+06	4.83675e+06	4.90882e+06	4.95131e+06	4.84774e+06	4.72236e+06	1.3005	Polygodial	234.162	477.3	234.162	0	C15H22O2	[M]+	Endogenous Metabolites		C09712		6754-20-7		Nodiff
M235T264.pos	2.65153e+06	2.55535e+06	0.963725	-0.053306	0.70525	0.921945	3.05551e+06	2.96513e+06	1.19024e+06	2.70446e+06	3.05325e+06	2.94061e+06	2.92001e+06	2.63068e+06	561465	3.40936e+06	2.92141e+06	2.88917e+06	0.424689	Lidocaine	235.181	264.2	234.173	0.85041	C14H22N2O	[M+H]+	Benzene and substituted derivatives	Xylenes	C07073	Xenobiotics biodegradation and metabolism	137-58-6	HMDB0014426	Nodiff
M235T555.pos	1.18379e+07	1.30098e+07	1.099	0.136191	0.0284993	0.442735	1.32097e+07	1.15014e+07	1.21342e+07	1.13656e+07	1.12624e+07	1.1554e+07	1.19685e+07	1.28876e+07	1.34555e+07	1.44809e+07	1.28989e+07	1.23676e+07	1.59743	Confertifolin	235.169	554.6	234.162	0.00950265	C15H22O2	[M+H]+			C09376		1811-23-0		Up
M241T44.pos	4.13509e+07	3.2728e+07	0.791471	-0.337391	0.885307	0.972072	616992	6.51017e+07	3.47109e+07	7.57474e+07	5.22318e+06	6.67052e+07	3.84755e+07	3.74937e+06	5.68322e+07	2.14114e+07	6.89508e+07	6.94909e+06	0.241384	Anserine	241.13	44.4	240.122	0.00272245	C10H16N4O3	[M+H]+	Peptidomimetics	Hybrid peptides	C01262	Amino acid metabolism; Metabolism of other amino acids	584-85-0	HMDB0000194	Nodiff
M241T620.neg	1.60077e+08	7.74753e+07	0.483989	-1.04695	0.872095	0.977202	7.2159e+08	4.51408e+07	4.61142e+07	7.77871e+07	5.96043e+07	1.0223e+07	5.41386e+07	1.06961e+08	5.57209e+07	5.42657e+07	5.20103e+07	1.41755e+08	0.169094	Pentadecanoic acid	241.217	619.9	242.225	0.0174117	C15H30O2	[M-H]-	Fatty Acyls	Fatty acids and conjugates	C16537		1002-84-2	HMDB0000826	Nodiff
M242T384.pos	4.39362e+06	4.31723e+06	0.982614	-0.025303	0.876296	0.969148	1.42951e+07	1.46997e+06	5.57406e+06	1.60981e+06	1.61447e+06	1.79834e+06	1.48435e+06	6.58888e+06	2.22413e+06	1.79795e+06	1.92652e+06	1.18816e+07	0.0254686	Equol	242.284	383.8	242.094	0.700023	C15H14O3	[M]+	Isoflavonoids	Isoflavans	C14131		531-95-3	HMDB0002209	Nodiff
M242T649.neg	5.37058e+07	3.55633e+07	0.662186	-0.594691	0.343415	0.886396	5.02633e+07	2.41963e+07	5.4032e+07	1.11287e+08	6.74228e+07	1.5034e+07	3.92532e+07	2.01611e+07	3.83131e+07	1.21766e+07	2.32948e+07	8.01809e+07	0.880761	Thymidine	242.176	648.6	242.09	0.408411	C10H14N2O5	[M]-	Pyrimidine nucleosides	Pyrimidine 2'-deoxyribonucleosides	C00214	Nucleotide metabolism	50-89-5	HMDB0000273	Nodiff
M243T158.pos	1.20693e+08	1.94406e+08	1.61074	0.687724	0.0341319	0.463533	1.16413e+08	1.57623e+08	6.18272e+07	1.7758e+08	1.03891e+08	1.06827e+08	2.08361e+08	9.99675e+07	1.85077e+08	2.42782e+08	2.28163e+08	2.02084e+08	1.68207	1-Hexadecanol	243.183	157.8	242.261	2.22965	C16H34O	[M+H]+	Fatty Acyls	Fatty alcohols	C00823	Lipid metabolism	36653-82-4	HMDB0003424	Up
M243T55.neg	3.76574e+07	2.07846e+07	0.551941	-0.857414	0.202512	0.854896	1.04919e+08	2.3854e+07	3.81787e+07	2.01608e+07	2.33286e+07	1.55025e+07	1.40794e+07	1.73879e+07	2.09764e+07	1.61131e+07	1.13819e+07	4.47691e+07	1.22713	Pseudouridine	243.062	55.3	244.07	0.164139	C9H12N2O6	[M-H]-	Nucleoside and nucleotide analogues		C02067	Nucleotide metabolism	1445-07-4	HMDB0000767	Nodiff
M243T64.neg	1.38445e+09	3.47291e+08	0.250852	-1.99509	0.808558	0.966318	6.87051e+09	2.95994e+08	6.91238e+08	1.9874e+08	2.04819e+08	4.5371e+07	2.47016e+08	5.10317e+08	2.98937e+08	1.15583e+08	3.5904e+08	5.52851e+08	0.232345	Uridine	243.062	64.5	244.07	1.74441	C9H12N2O6	[M-H]-	Pyrimidine nucleosides		C00299	Membrane transport; Nucleotide metabolism	58-96-8	HMDB0000296	Nodiff
M244T51.pos	1.13965e+09	1.31719e+09	1.15578	0.208871	0.717074	0.924562	1.6742e+08	2.42941e+08	5.06663e+09	2.98336e+08	7.2022e+08	3.4235e+08	2.96411e+08	4.45546e+08	5.41322e+09	1.15277e+09	2.58732e+08	3.36462e+08	0.349624	Cytidine	244.092	51.2	243.085	2.76945	C9H13N3O5	[M+H]+			C00475	Membrane transport; Nucleotide metabolism	65-46-3		Nodiff
M247T147.pos	1.76455e+06	1.7452e+06	0.98903	-0.0159132	0.85637	0.963654	2.98087e+06	2.58295e+06	2.32838e+06	1.98863e+06	409444	297037	2.13242e+06	475731	1.57982e+06	561318	483168	5.23872e+06	0.283129	N-Acetyl-D-tryptophan	247.129	147.2	246.1	0.458407	C13H14N2O3	[M+H]+			C03137		2280-01-05		Nodiff
M249T281.pos	6.77657e+06	4.03033e+06	0.594744	-0.749659	0.068237	0.505399	6.70182e+06	1.00648e+07	9.20433e+06	6.39856e+06	5.4173e+06	2.87266e+06	2.03509e+06	2.52835e+06	4.46259e+06	4.98808e+06	4.06715e+06	6.10071e+06	1.58215	Pindolol	249.159	281	248.153	1.91042	C14H20N2O2	[M+H]+	Indoles and derivatives	Indoles	C07445		13523-86-9	HMDB0015095	Nodiff
M249T53.neg	2.20551e+08	1.73391e+08	0.786172	-0.347084	0.6108	0.930688	4.83433e+08	2.26926e+08	2.06322e+08	1.93022e+08	1.64629e+08	4.89775e+07	2.23614e+08	1.04594e+08	1.6407e+08	1.57807e+08	4.57078e+07	3.44555e+08	0.484372	gamma-Glutamylcysteine	248.96	53.1	250.062	0.0348602	C8H14N2O5S	[M-H]-	Carboxylic acids and derivatives	Amino acids, peptides, and analogues	C00669	Cell growth and death; Metabolism of other amino acids	636-58-8	HMDB0001049	Nodiff
M250T416.pos	8.40992e+07	9.42924e+07	1.1212	0.165049	0.644759	0.897163	7.12011e+07	9.29842e+07	3.3201e+07	1.11582e+08	1.05119e+08	9.05077e+07	1.3858e+08	1.28327e+08	4.99203e+07	9.71103e+07	9.239e+07	5.94268e+07	0.475276	Alprenolol	250.178	416	249.173	9.81298	C15H23NO2	[M+H]+	Therapeutics/Prescription Drugs		D07156				Nodiff
M251T508.pos	3.06112e+07	2.7582e+07	0.901042	-0.150334	0.805221	0.950098	1.11643e+08	9.47915e+06	2.44443e+07	1.73664e+07	1.43113e+07	6.42263e+06	2.71945e+07	9.31134e+06	2.09566e+07	1.54154e+07	1.38545e+07	7.87595e+07	0.072668	OPEO	251.201	508.5	250.193	1.3691	C16H26O2	[M+H]+	Extractables/Leachables; Textile Chemicals/Auxiliary/Dyes		D05229				Nodiff
M252T42_1.neg	1.94227e+06	497572	0.25618	-1.96477	0.96007	0.994074	1.07509e+07	70807	793057	20493	13169.2	5182.58	300541	3413.05	337214	11440.2	157121	2.1757e+06	0.0575092	Neopterin	251.867	42.2	253.081	0.689553	C9H11N5O4	[M-H]-	Pteridines and derivatives	Pterins and derivatives	C05926	Metabolism of cofactors and vitamins	2009-64-5	HMDB0000845	Nodiff
M252T51.pos	2.82033e+07	3.08472e+07	1.09374	0.129276	0.788295	0.946485	3.41041e+07	3.90571e+07	3.76772e+07	1.08944e+07	3.50201e+07	1.24667e+07	3.21377e+07	1.40493e+07	5.0653e+07	4.77636e+07	2.58223e+07	1.4657e+07	0.186821	Muramic acid	252.107	50.8	251.101	1.88808	C9H17NO7	[M+H]+	Organooxygen compounds	Carbohydrates and carbohydrate conjugates	C06470		1114-41-6/484-57-1	HMDB0003254	Nodiff
M253T445.pos	3.00233e+06	2.42283e+06	0.806985	-0.309387	0.957787	0.989428	3.73093e+06	1.0409e+06	2.92634e+06	8.18797e+06	1.04916e+06	1.07865e+06	1.24871e+06	3.06506e+06	3.50139e+06	1.29092e+06	1.27678e+06	4.15413e+06	0.0781028	16-Oxopalmitate	253.216	444.9	270.219	15.9311	C16H30O3	[M+H-H2O]+			C19614				Nodiff
M253T664.neg	6.49053e+07	3.28132e+07	0.505556	-0.984058	0.0487184	0.787307	9.55492e+07	8.44401e+07	8.4403e+07	6.19828e+07	3.95524e+07	2.35044e+07	3.07679e+07	2.0006e+07	3.32872e+07	4.19344e+07	1.54804e+07	5.54035e+07	1.7613	Palmitoleic acid	253.219	664.3	254.225	7.80351	C16H30O2	[M-H]-	Fatty Acyls	Fatty acids and conjugates	C08362	Lipid metabolism	373-49-9	HMDB0003229	Down
M255T518.pos	5.85707e+07	4.41564e+07	0.753898	-0.407559	0.460325	0.823787	9.20108e+07	2.90386e+07	9.28902e+07	4.34533e+07	6.51075e+07	2.89242e+07	3.49964e+07	3.84152e+07	4.2277e+07	4.96599e+07	4.27172e+07	5.68726e+07	0.795245	16-Hydroxy hexadecanoic acid	255.232	517.9	272.235	15.4135	C16H32O3	[M+H-H2O]+	Fatty Acyls	Fatty acids and conjugates	C18218		506-13-8	HMDB0006294	Nodiff
M255T677.neg	1.29486e+08	1.3257e+08	1.02382	0.0339641	0.845989	0.975186	1.76224e+08	1.29232e+08	1.22093e+08	1.42179e+08	1.35721e+08	7.14643e+07	7.83803e+07	1.47004e+08	1.26521e+08	1.32305e+08	1.62972e+08	1.48239e+08	0.226196	Palmitic acid	255.233	677.1	256.24	1.47316	C16H32O2	[M-H]-	Fatty Acyls	Fatty acids and conjugates	C00249	Lipid metabolism	1957-10-03	HMDB0000220	Nodiff
M256T48_2.neg	7.11079e+06	1.78652e+07	2.51241	1.32907	0.000453861	0.484119	1.0108e+07	5.73581e+06	9.85888e+06	7.30391e+06	4.15974e+06	5.4984e+06	2.04274e+07	1.29534e+07	2.04896e+07	1.61027e+07	1.8551e+07	1.86674e+07	2.69696	N2-gamma-Glutamylglutamine	256.094	47.6	275.112	2.30384	C10H17N3O6	[M-H2O-H]-	Carboxylic acids and derivatives	Amino acids, peptides, and analogues	C05283		10148-81-9/1466-50-8	HMDB0011738	Up
M265T221.pos	7.45338e+06	4.99414e+06	0.67005	-0.57766	0.841999	0.959623	91638.5	3.85577e+06	2.14753e+07	4.53935e+06	2.32195e+06	1.24363e+07	2.69261e+06	1.0986e+07	2.13536e+06	7.43425e+06	6.63023e+06	86401.3	0.10115	Subaphylline	265.155	221	264.147	0.467651	C14H20N2O3	[M+H]+	Cinnamic acids and derivatives	Hydroxycinnamic acids and derivatives	C10497	Amino acid metabolism	501-13-3	HMDB0033463	Nodiff
M265T682.neg	4.20303e+07	3.05103e+07	0.725912	-0.462134	0.718923	0.951207	1.86042e+08	1.03513e+07	1.42056e+07	1.34802e+07	1.31345e+07	1.49682e+07	1.96903e+07	2.117e+07	3.86069e+07	1.1988e+07	1.59527e+07	7.56536e+07	0.337415	Practolol	265.149	681.9	266.163	27.2451	C14H22N2O3	[M-H]-	Benzene and substituted derivatives	Anilides	C11696		6673-35-4	HMDB0015411	Nodiff
M267T465.neg	5.75678e+07	7.22007e+07	1.25419	0.326751	0.216075	0.862413	1.30109e+08	3.66749e+07	5.05648e+07	3.43299e+07	5.44617e+07	3.92668e+07	5.76757e+07	6.45445e+07	7.70496e+07	5.56564e+07	6.12026e+07	1.17075e+08	1.1865	Formononetin	267.197	464.7	268.074	20.2496	C16H12O4	[M-H]-	Isoflavonoids	O-methylated isoflavonoids	C00858		485-72-3	HMDB0005808	Nodiff
M267T492.neg	7.39125e+06	7.76957e+06	1.05118	0.0720161	0.693121	0.948685	9.14301e+06	6.7734e+06	8.05449e+06	7.4587e+06	7.32095e+06	5.59696e+06	5.39561e+06	6.45377e+06	8.74545e+06	8.62347e+06	8.83858e+06	8.56055e+06	0.413022	Hexadecanedioate	267.196	491.8	286.214	0.0374257	C16H30O4	[M-H2O-H]-	Fatty Acyls	Fatty acids and conjugates	C19615		505-54-4	HMDB0000672	Nodiff
M267T66.neg	5.60236e+06	8.55475e+06	1.52699	0.610692	0.0579758	0.810142	4.18014e+06	3.25663e+06	4.65929e+06	5.85465e+06	4.59378e+06	1.10696e+07	8.57832e+06	6.91639e+06	1.4596e+07	6.45655e+06	6.4049e+06	8.37631e+06	1.70307	Inosine	267.073	66.1	268.081	2.99544	C10H12N4O5	[M-H]-	Purine nucleosides		C00294	Membrane transport; Nucleotide metabolism	58-63-9	HMDB0000195	Nodiff
M268T63.pos	7.52829e+06	7.75794e+06	1.03051	0.0433519	0.725424	0.927324	7.88796e+06	9.90348e+06	8.61765e+06	7.46864e+06	2.48354e+06	8.80845e+06	8.5452e+06	8.58189e+06	9.88095e+06	8.29455e+06	6.591e+06	4.65404e+06	0.260252	Adenosine	268.103	62.8	267.097	1.86495	C10H13N5O4	[M+H]+	Purine nucleosides		C00212	Circulatory system; Membrane transport; Signal transduction; Endocrine system; Neurodegenerative disease; Signaling molecules and interaction; Nucleotide metabolism; Substance dependence	58-61-7	HMDB0000050	Nodiff
M269T508.neg	2.7246e+07	2.67444e+07	0.981588	-0.0268098	0.481171	0.903255	1.06426e+08	9.4818e+06	1.47571e+07	1.61425e+07	1.11442e+07	5.52417e+06	2.11226e+07	1.7615e+07	3.96976e+07	1.05183e+07	1.44723e+07	5.70405e+07	0.699485	Dehydroepiandrosterone	269.213	508.3	288.209	1.5854	C19H28O2	[M-H2O-H]-	Steroids and steroid derivatives	Androstane steroids	C01227	Lipid metabolism; Cancer: overview; Endocrine system; Cancer: specific types	53-43-0	HMDB0000077	Nodiff
M271T138.neg	3.69001e+06	3.39392e+06	0.919759	-0.120672	0.722972	0.951502	2.98111e+06	2.99011e+06	2.28513e+06	4.36696e+06	4.90713e+06	4.60964e+06	3.38629e+06	3.73882e+06	3.26521e+06	3.14678e+06	3.19723e+06	3.62921e+06	0.367456	N2-Malonyl-D-tryptophan	271.07	137.8	290.09	6.30829	C14H14N2O5	[M-H2O-H]-	Azacyclic compounds	Amino acids, peptides, and analogues	C03414				Nodiff
M271T445.pos	3.78296e+06	4.4802e+06	1.18431	0.244045	0.302789	0.741507	7.09598e+06	875874	1.58387e+06	4.57888e+06	4.89565e+06	3.66754e+06	3.6752e+06	3.88422e+06	4.44088e+06	5.53951e+06	4.43892e+06	4.90245e+06	0.94785	Genistein	271.226	444.9	270.053	2.73747	C15H10O5	[M+H]+	Isoflavonoids	Isoflav-2-enes	C06563		446-72-0	HMDB0003217	Nodiff
M272T248.pos	9.78709e+06	8.2308e+06	0.840985	-0.249847	0.299818	0.740074	6.90488e+06	1.02277e+07	7.20282e+06	1.15894e+07	1.22308e+07	1.05669e+07	3.29913e+06	1.53449e+07	5.22143e+06	4.36892e+06	8.2317e+06	1.29187e+07	0.861518	17a-Estradiol	272.186	247.5	272.178	4.09167	C18H24O2	[M]+	Steroids and steroid derivatives	Estrane steroids	C02537	Lipid metabolism	57-91-0	HMDB0000429	Nodiff
M272T277.neg	96844.8	105768	1.09214	0.127154	0.516392	0.914337	40109.9	107382	99175.6	107945	142871	83585	116492	132854	128444	91971.1	81117.3	83727.8	0.697942	4-(3-Methylbut-2-enyl)-L-tryptophan	272.15	277.2	272.152	8.0837	C16H20N2O2	[M]-	Azacyclic compounds	Amines	C04290				Nodiff
M275T508.pos	2.24035e+07	1.64612e+07	0.734757	-0.44466	0.816366	0.952076	8.14885e+07	8.37327e+06	1.54965e+07	1.98975e+07	5.93559e+06	3.2298e+06	7.91239e+06	1.34494e+07	3.25164e+07	9.11314e+06	1.07441e+07	2.50314e+07	0.110112	Nandrolone	275.2	508.4	274.193	1.29387	C18H26O2	[M+H]+	Steroids and steroid derivatives	Estrane steroids	C07254		434-22-0	HMDB0002725	Nodiff
M276T61.pos	7.1214e+06	6.36497e+06	0.893781	-0.162007	0.99841	0.999372	6.47882e+06	1.40388e+07	1.62409e+07	1.67317e+06	2.68822e+06	1.60849e+06	4.51096e+06	1.66549e+06	9.21691e+06	2.95582e+06	1.67429e+07	3.09778e+06	0.0630039	Saccharopine	276.108	60.6	276.132	1.02831	C11H20N2O6	[M]+	Carboxylic acids and derivatives	Amino acids, peptides, and analogues	C00449	Amino acid metabolism	997-68-2	HMDB0000279	Nodiff
M276T67.pos	8.59071e+07	1.09857e+08	1.27879	0.354784	0.230588	0.697876	1.34933e+08	6.18132e+07	1.26504e+08	7.87889e+07	3.20347e+07	8.13687e+07	9.36937e+07	9.01289e+07	8.67102e+07	1.36062e+08	8.76707e+07	1.64879e+08	0.834002	4-Hydroxycinnamoylagmatine	276.144	66.8	276.159	0.3451	C14H20N4O2	[M]+	Cinnamic acids and derivatives	Hydroxycinnamic acids and derivatives	C04498	Amino acid metabolism	7295-86-5	HMDB0033460	Nodiff
M277T33.pos	3.66161e+07	1.18322e+07	0.323141	-1.62977	0.659072	0.901959	2.11443e+08	2.34389e+06	1.98694e+06	1.24646e+06	1.28846e+06	1.38836e+06	2.01689e+06	1.6257e+07	1.69066e+06	1.49276e+07	1.20076e+06	3.49001e+07	0.194196	6-Phosphogluconic acid	276.899	33	276.025	8.13539	C6H13O10P	[M+H]+	Organooxygen compounds	Carbohydrates and carbohydrate conjugates	C00345	Carbohydrate metabolism	921-62-0 / 53411-70-4	HMDB0001316	Nodiff
M277T452.pos	1.05912e+07	1.84623e+07	1.74318	0.801719	0.264	0.715835	8.22063e+06	4.96194e+06	6.78529e+06	2.18999e+07	9.5825e+06	1.20969e+07	3.18474e+06	1.65469e+07	2.36073e+07	2.25141e+07	1.34981e+07	3.1423e+07	0.992278	Stearidonic acid	277.216	451.6	276.209	1.35634	C18H28O2	[M+H]+	Fatty Acyls	Lineolic acids and derivatives	C16300	Lipid metabolism	20290-75-9	HMDB0006547	Nodiff
M279T550.pos	1.37924e+08	1.40874e+08	1.02139	0.0305306	0.656055	0.900473	2.13518e+08	1.17243e+08	1.94153e+08	1.29002e+08	1.27497e+08	4.61333e+07	1.17292e+08	1.50998e+08	1.20265e+08	1.48991e+08	1.19238e+08	1.8846e+08	0.21449	Dibutyl phthalate	279.159	550.3	278.152	1.12773	C16H22O4	[M+H]+	Benzene and substituted derivatives	Benzoic acids and derivatives	C14214		84-74-2	HMDB0033244	Nodiff
M279T555.pos	1.33184e+08	1.10459e+08	0.829373	-0.269908	0.727267	0.927746	3.22088e+08	7.16431e+07	9.09957e+07	5.96766e+07	1.59563e+08	9.51393e+07	6.92185e+07	1.50741e+08	7.66308e+07	8.17322e+07	6.71087e+07	2.17325e+08	0.407236	(9Z,12Z,15Z)-Octadecatrienoic acid	279.231	554.6	278.225	2.06281	C18H30O2	[M+H]+	Fatty Acyls	Lineolic acids and derivatives	C06427	Lipid metabolism	463-40-1	HMDB0001388	Nodiff
M279T567.pos	1.80145e+07	3.12406e+07	1.7342	0.794266	0.229645	0.697876	3.76182e+07	1.71944e+07	6.76581e+06	2.53781e+07	4.49438e+06	1.66359e+07	3.05996e+07	5.16708e+06	3.30072e+07	5.29455e+07	3.31458e+07	3.25786e+07	0.954224	(9Z,11E,13E)-Octadecatrienoic acid	279.231	566.7	278.225	3.13719	C18H30O2	[M+H]+			C08315		506-23-0		Nodiff
M279T621.pos	6.91049e+06	2.24196e+07	3.24428	1.6979	0.0199378	0.418477	5.10385e+06	4.31153e+06	7.62246e+06	645756	6.8619e+06	1.69175e+07	9.5518e+06	1.70064e+07	2.35335e+07	3.11091e+07	2.54812e+07	2.78357e+07	1.86188	13S-hydroxyoctadecadienoic acid	279.232	620.7	296.235	0.71625	C18H32O3	[M+H-H2O]+	Fatty Acyls	Lineolic acids and derivatives	C14762	Lipid metabolism; Endocrine system	5204-88-6/29623-28-7	HMDB0004667	Up
M279T90.neg	3.98524e+06	2.58731e+06	0.649223	-0.623214	0.87094	0.977202	1.32358e+07	2.24943e+06	3.64218e+06	2.26606e+06	1.60334e+06	914667	2.59121e+06	2.20915e+06	3.06557e+06	1.98225e+06	1.79948e+06	3.8762e+06	0.159917	Sulfamethoxypyridazine	279.057	90.1	280.063	3.45821	C11H12N4O3S	[M-H]-	Therapeutics/Prescription Drugs		D02439				Nodiff
M280T493_3.pos	1.22096e+07	2.12715e+07	1.74219	0.800905	0.0912212	0.54145	3.49625e+07	8.51579e+06	8.79773e+06	8.7077e+06	2.04829e+06	1.02255e+07	2.95349e+07	1.85451e+07	2.02931e+07	1.28367e+07	1.13884e+07	3.50307e+07	1.30811	3-Ketosphingosine	280.263	492.9	297.267	13.68	C18H35NO2	[M+H-H2O]+			C06121				Nodiff
M280T565.neg	8.33253e+06	1.1857e+07	1.42298	0.508918	0.222034	0.862413	3.12575e+07	3.48942e+06	4.91913e+06	7.31023e+06	2.79208e+06	226819	7.98115e+06	9.00338e+06	1.72816e+07	4.45333e+06	5.33507e+06	2.70878e+07	1.22707	Linoleic acid	280.241	565.4	280.24	3.92519	C18H32O2	[M]-	Fatty Acyls	Lineolic acids and derivatives	C01595	Lipid metabolism	60-33-3	HMDB0000673	Nodiff
M281T495.pos	1.12585e+07	1.10384e+07	0.980452	-0.0284815	0.896712	0.974784	2.22997e+07	8.19804e+06	8.66146e+06	1.05144e+07	8.27081e+06	9.60659e+06	7.83995e+06	1.36024e+07	8.89559e+06	1.11511e+07	9.59398e+06	1.51474e+07	0.0302684	Stearolic acid	281.247	495.2	280.24	1.3369	C18H32O2	[M+H]+	Endogenous Metabolites; Natural Products/Medicines		C08459		506-24-1		Nodiff
M281T527.pos	1.05303e+07	1.85976e+07	1.76609	0.820562	0.0729695	0.511461	9.60949e+06	4.4664e+06	7.27321e+06	1.42597e+07	1.29712e+07	1.4602e+07	1.70869e+07	1.94254e+07	2.18243e+07	6.75729e+06	1.65125e+07	2.9979e+07	1.57504	10E,12Z-Octadecadienoic acid	281.247	527.5	280.24	2.84448	C18H32O2	[M+H]+	Fatty Acyls	Lineolic acids and derivatives	C04056	Lipid metabolism	2420-56-6	HMDB0005048	Nodiff
M281T683.neg	1.26116e+09	1.24489e+09	0.987101	-0.01873	0.965133	0.994074	2.11062e+09	1.02465e+09	1.37626e+09	1.21138e+09	9.12555e+08	9.31512e+08	8.48523e+08	9.65925e+08	1.39617e+09	1.55417e+09	1.18725e+09	1.51733e+09	0.0260832	(6Z)-Octadecenoic acid	281.244	683.1	282.256	13.2577	C18H34O2	[M-H]-			C08363		593-39-5		Nodiff
M282T52.pos	3.66977e+07	4.29403e+07	1.17011	0.226642	0.313778	0.747491	1.12076e+07	3.8848e+07	3.74322e+07	3.7317e+07	4.69106e+07	4.84707e+07	4.45848e+07	4.43483e+07	4.27807e+07	4.32802e+07	3.84287e+07	4.4219e+07	1.03032	1-Methyladenosine	282.118	51.7	281.112	3.63614	C11H15N5O4	[M+H]+	Purine nucleosides		C02494		15763-06-1	HMDB0003331	Nodiff
M282T653.pos	1.09067e+07	1.16901e+07	1.07183	0.100073	0.533642	0.856634	7.13461e+06	1.25681e+07	1.12383e+07	9.93653e+06	1.1358e+07	1.32046e+07	1.06952e+07	1.06169e+07	1.41963e+07	1.19167e+07	1.3863e+07	8.85254e+06	0.700296	Oleamide	282.285	653.4	281.272	20.6316	C18H35NO	[M+H]+	Fatty Acyls	Fatty amides	C19670		301-02-0	HMDB0002117	Nodiff
M282T663.pos	1.14441e+07	1.26053e+07	1.10147	0.139426	0.44713	0.818129	1.46559e+06	1.33935e+07	1.38865e+07	1.4896e+07	1.11716e+07	1.38516e+07	1.3266e+07	1.1715e+07	1.41752e+07	1.15679e+07	1.21662e+07	1.27415e+07	0.80179	Oleic acid	282.281	662.5	282.256	4.66047	C18H34O2	[M]+	Fatty Acyls	Fatty acids and conjugates	C00712	Lipid metabolism	112-80-1	HMDB0000207	Nodiff
M283T552.neg	6.7776e+06	5.35688e+06	0.79038	-0.339381	0.0290707	0.742446	5.69749e+06	5.9015e+06	8.31045e+06	7.32812e+06	6.84045e+06	6.5876e+06	5.72612e+06	5.02505e+06	5.96877e+06	5.72179e+06	3.74568e+06	5.95388e+06	1.92818	2-Methoxyestradiol	283.17	551.6	302.188	0.670975	C19H26O3	[M-H2O-H]-	Steroids and steroid derivatives	Estrane steroids	C05302	Lipid metabolism	362-07-2	HMDB0000405	Down
M283T566.pos	4.61703e+07	4.25614e+07	0.921835	-0.11742	0.695094	0.916682	2.49967e+07	5.84987e+07	1.94232e+07	5.00014e+07	7.34535e+07	5.06485e+07	1.62283e+07	6.43785e+07	5.00649e+07	7.24563e+07	1.7983e+07	3.42576e+07	0.259922	(R)-10-Hydroxystearate	283.263	566.4	300.266	14.2414	C18H36O3	[M+H-H2O]+	Carboxylic acids and derivatives	Alcohols and polyols	C03195		638-26-6		Nodiff
M283T637.neg	7.2746e+07	7.47832e+07	1.028	0.0398449	0.815671	0.967801	1.1092e+08	5.94743e+07	7.81458e+07	6.8297e+07	6.67361e+07	5.29031e+07	5.45307e+07	6.03477e+07	8.05159e+07	7.21672e+07	7.52314e+07	1.05906e+08	0.231252	Guanosine	283.259	637.2	283.092	16.7812	C10H13N5O5	[M]-	Purine nucleosides		C00387	Membrane transport; Nucleotide metabolism	118-00-3	HMDB0000133	Nodiff
M283T66_1.neg	3.52994e+07	1.26179e+07	0.357453	-1.48417	0.552747	0.918925	1.18893e+08	5.2695e+06	7.65679e+07	3.99692e+06	3.99718e+06	3.07225e+06	4.48007e+06	2.64647e+06	5.02697e+06	3.16912e+06	1.32766e+07	4.71081e+07	0.59662	Xanthosine	283.067	66.5	284.076	5.03061	C10H12N4O6	[M-H]-	Purine nucleosides		C01762	Membrane transport; Biosynthesis of other secondary metabolites; Nucleotide metabolism	146-80-5	HMDB0000299	Nodiff
M284T518.neg	2.39093e+08	3.89065e+08	1.62726	0.702441	0.385313	0.896064	2.97177e+08	2.06829e+08	3.75879e+08	3.69377e+08	1.60101e+08	2.51933e+07	3.27346e+08	4.19217e+08	5.05793e+08	2.27183e+08	5.7514e+07	7.97337e+08	0.876372	Octadecanoic acid	284.267	518	284.272	15.1266	C18H36O2	[M]-	Fatty Acyls	Fatty acids and conjugates	C01530	Lipid metabolism	c("57-11-4", "646-29-7")	HMDB0000827	Nodiff
M284T578.pos	1.12698e+08	1.323e+08	1.17393	0.231348	0.442684	0.816406	1.28509e+08	9.72568e+07	1.16634e+08	7.42349e+07	1.10441e+08	1.49115e+08	1.44158e+08	1.36718e+08	8.78254e+07	1.8578e+08	1.60702e+08	7.86179e+07	0.599017	Octadecanamide	284.293	578.4	283.288	5.89532	C18H37NO	[M+H]+	Fatty Acyls	Fatty amides	C13846		124-26-5	HMDB0034146	Nodiff
M285T475.pos	8.81983e+06	8.38352e+06	0.950531	-0.0731942	0.702634	0.920864	1.2293e+07	7.80556e+06	7.35653e+06	6.68814e+06	1.04045e+07	8.37124e+06	7.01078e+06	7.45071e+06	9.61784e+06	6.34239e+06	7.73495e+06	1.21445e+07	0.33283	Biochanin A	285.204	474.7	284.068	1.69937	C16H12O5	[M+H]+	Isoflavonoids	O-methylated isoflavonoids	C00814		491-80-5	HMDB0002338	Nodiff
M285T532.pos	3.85833e+07	3.68279e+07	0.954502	-0.0671802	0.833991	0.956957	8.19568e+07	4.41428e+07	1.46569e+07	4.7123e+07	2.1118e+07	2.25025e+07	1.85261e+07	4.90768e+07	5.38777e+07	3.66586e+07	2.92059e+07	3.36222e+07	0.164255	9-cis-Retinal	285.221	532.3	284.214	0.26646	C20H28O	[M+H]+	Prenol lipids	Retinoids	C16681	Metabolism of cofactors and vitamins	514-85-2	HMDB0006218	Nodiff
M286T421.pos	1.06094e+08	2.08328e+08	1.96362	0.973514	0.191294	0.670747	4.06093e+08	3.34474e+07	7.23248e+07	6.50598e+07	5.05624e+07	9.07502e+06	1.58346e+08	1.58332e+08	3.91433e+08	4.59183e+07	3.71395e+07	4.58797e+08	1.03758	Fisetin	286.274	421.2	286.048	3.24055	C15H10O6	[M]+			C10041		345909-34-4		Nodiff
M288T51_2.pos	7.226e+07	9.4988e+07	1.31453	0.394549	0.387743	0.788035	1.86968e+08	1.46301e+08	1.93277e+07	6.55303e+07	1.16287e+07	3.80416e+06	1.65294e+08	1.56563e+07	1.36081e+08	2.01166e+07	1.25876e+08	1.06904e+08	0.7	Indoleglycerol phosphate	288.075	51.4	287.056	0.391842	C11H14NO6P	[M+H]+			C03506	Amino acid metabolism	4220-97-7		Nodiff
M289T45_2.neg	2.2491e+06	1.90531e+06	0.847143	-0.239322	0.446451	0.903209	9.18756e+06	952560	1.4112e+06	1.23264e+06	643032	67611.1	2.163e+06	2.40579e+06	1.7215e+06	488077	1.38311e+06	3.27038e+06	0.785779	Argininosuccinic acid	289.116	45	290.123	1.38353	C10H18N4O6	[M-H]-	Carboxylic acids and derivatives	Amino acids, peptides, and analogues	C03406	Amino acid metabolism	2387-71-5	HMDB0000052	Nodiff
M289T504.pos	4.15053e+06	5.97156e+06	1.43875	0.524812	0.377211	0.782971	1.07851e+06	6.52363e+06	5.74378e+06	2.56689e+06	3.55126e+06	5.43912e+06	7.01135e+06	5.75616e+06	9.41143e+06	6.96549e+06	5.39736e+06	1.28756e+06	0.864422	Etiocholanedione	289.216	504	288.209	0.774507	C19H28O2	[M+H]+	Organic oxides	Androstane steroids	C03772	Lipid metabolism	1229-12-5	HMDB0003769	Nodiff
M289T53.neg	8.60868e+06	1.50849e+07	1.7523	0.809246	0.271371	0.879241	2.98526e+07	3.86491e+06	3.79628e+06	5.14999e+06	5.06536e+06	3.92293e+06	2.76903e+06	3.32144e+07	3.85818e+06	1.4757e+07	1.98567e+07	1.60543e+07	1.02724	Epiandrosterone	288.953	53	290.225	0.975961	C19H30O2	[M-H]-	Steroids and steroid derivatives	Androstane steroids	C07635		481-29-8	HMDB0000365	Nodiff
M291T386.pos	8.51395e+06	1.44632e+07	1.69876	0.764486	0.123227	0.589578	6.29182e+06	5.68815e+06	8.97203e+06	1.52313e+07	9.52677e+06	5.37359e+06	1.65281e+07	1.5777e+07	1.97362e+07	5.88158e+06	6.72915e+06	2.2127e+07	1.35776	Cyclopentolate	291.185	385.7	291.183	4.80794	C17H25NO3	[M]+	Benzene and substituted derivatives		C06932		512-15-2	HMDB0015114	Nodiff
M291T519.pos	4.44017e+06	3.46437e+06	0.780233	-0.358022	0.671939	0.906773	1.07746e+07	878273	1.24524e+06	1.14008e+07	1.78373e+06	558329	1.34784e+06	4.16812e+06	1.79775e+06	3.11993e+06	2.56468e+06	7.78789e+06	0.283166	Etiocholanolone	291.232	518.6	290.225	0.60433	C19H30O2	[M+H]+	Steroids and steroid derivatives	Androstane steroids	C04373	Lipid metabolism	53-42-9	HMDB0000490	Nodiff
M293T499.pos	3.88843e+07	6.81126e+07	1.75167	0.808734	0.255552	0.713327	1.24076e+08	2.32433e+06	4.92043e+06	8.62388e+06	1.53527e+07	7.80084e+07	6.92405e+06	4.8078e+07	1.68622e+07	4.80339e+07	9.6279e+07	1.92499e+08	0.923931	12-OPDA	293.211	498.7	292.204	0.111297	C18H28O3	[M+H]+			C01226	Lipid metabolism	67204-66-4 / 85551-10-6		Nodiff
M293T508.pos	1.71183e+07	1.65364e+07	0.966009	-0.0498921	0.504874	0.844812	2.4763e+07	2.93436e+07	1.62021e+07	1.02193e+07	1.84779e+07	3.70386e+06	5.89648e+06	5.21835e+06	1.54492e+07	6.54744e+06	5.42257e+06	6.06844e+07	0.667352	13(S)-HpOTrE	293.212	508.2	310.214	15.7721	C18H30O4	[M+H-H2O]+			C04785	Lipid metabolism	67597-26-6		Nodiff
M293T513.neg	2.45988e+08	2.45858e+08	0.999468	-0.000767979	0.977807	0.995329	3.28941e+08	1.52038e+08	2.20672e+08	3.94537e+08	2.3864e+08	1.41102e+08	2.08669e+08	2.13507e+08	3.06419e+08	1.54697e+08	1.71801e+08	4.20053e+08	0.0451893	9-OxoODE	293.212	513.3	294.219	1.42839	C18H30O3	[M-H]-	Fatty Acyls	Lineolic acids and derivatives	C14766	Lipid metabolism	54232-59-6	HMDB0004669	Nodiff
M295T229.pos	1.2953e+07	3.27334e+07	2.52709	1.33748	0.28515	0.731012	1.39641e+06	3.71119e+07	1.10411e+06	3.61809e+07	972343	952159	4.87181e+07	879796	5.99152e+07	907579	5.6709e+07	2.92708e+07	0.992542	Aspartame	295.129	229.3	294.122	0.30353	C14H18N2O5	[M+H]+	Carboxylic acids and derivatives	Amino acids, peptides, and analogues	C11045	Sensory system	22839-47-0	HMDB0001894	Nodiff
M295T415_2.pos	7.35958e+06	8.14553e+06	1.10679	0.146384	0.903952	0.976797	1.11758e+07	8.73758e+06	5.32964e+06	7.5357e+06	8.56576e+06	2.81298e+06	6.42403e+06	1.57058e+07	5.72584e+06	1.14719e+07	6.92997e+06	2.61568e+06	0.0563391	(2'E,4'Z,8E)-Colneleic acid	295.221	414.5	294.219	12.5777	C18H30O3	[M+H]+	Fatty Acyls	Fatty acids and conjugates	C19827		52761-34-9	HMDB0030995	Nodiff
M295T452.pos	1.93484e+07	9.67882e+06	0.500239	-0.999312	0.0482877	0.483604	1.89477e+07	3.39247e+07	1.42527e+07	2.88155e+07	1.26902e+07	7.45962e+06	5.94354e+06	6.6904e+06	9.89387e+06	8.85295e+06	1.03772e+07	1.63149e+07	1.65377	9,10-12,13-Diepoxyoctadecanoate	295.226	451.8	312.23	12.9868	C18H32O4	[M+H-H2O]+	Carboxylic acids and derivatives	Carbonyl compounds	C14836	Lipid metabolism			Down
M295T47.pos	2.87929e+07	2.50763e+07	0.870922	-0.199385	0.765289	0.937984	9.85037e+07	1.51316e+07	1.88964e+07	2.7757e+07	8.94182e+06	3.52685e+06	2.24908e+07	1.79895e+07	2.9538e+07	7.94693e+06	1.16118e+07	6.08811e+07	0.158886	Indican	294.938	46.8	295.106	4.55274	C14H17NO6	[M]+			C08481		487-60-5		Nodiff
M295T471.pos	1.17265e+08	1.55122e+08	1.32283	0.403632	0.53982	0.858506	1.4734e+08	1.49748e+08	1.66366e+08	1.20593e+08	4.04889e+07	7.9053e+07	9.16346e+07	7.37515e+07	1.3554e+08	3.8933e+08	9.52734e+07	1.45203e+08	0.345458	13(S)-HOT	295.226	470.7	294.219	0.934875	C18H30O3	[M+H]+	Carboxylic acids and derivatives	Alcohols and polyols	C16316	Lipid metabolism	87984-82-5		Nodiff
M295T535.neg	5.4163e+08	4.79019e+08	0.884403	-0.177224	0.972119	0.994074	1.23382e+09	3.67825e+08	3.70355e+08	5.98798e+08	3.55809e+08	3.23169e+08	3.90162e+08	4.24219e+08	3.89615e+08	6.19689e+08	5.17211e+08	5.33221e+08	0.0627272	Alpha-dimorphecolic acid	295.228	535.4	296.235	1.6936	C18H32O3	[M-H]-	Fatty Acyls	Lineolic acids and derivatives	C14767	Lipid metabolism; Endocrine system	73543-67-6	HMDB0004670	Nodiff
M295T538.pos	6.62187e+08	3.66008e+08	0.552726	-0.855362	0.0599481	0.494026	7.15953e+08	9.55042e+08	9.46667e+08	5.79195e+08	5.28175e+08	2.48092e+08	2.1705e+08	1.83413e+08	4.16094e+08	4.3974e+08	3.61048e+08	5.78707e+08	1.62592	13-L-Hydroperoxylinoleic acid	295.226	537.5	312.23	2.70978	C18H32O4	[M+H-H2O]+	Fatty Acyls	Lineolic acids and derivatives	C04717	Lipid metabolism	33964-75-9	HMDB0003871	Nodiff
M295T548.pos	4.43813e+07	2.77116e+07	0.624398	-0.679462	0.157169	0.632619	6.06644e+07	6.08719e+07	6.34231e+07	3.58907e+07	2.96387e+07	1.57991e+07	1.78312e+07	1.17902e+07	2.68925e+07	2.75931e+07	2.68795e+07	5.52833e+07	1.32735	9(S)-HPODE	295.226	548.4	312.23	2.70978	C18H32O4	[M+H-H2O]+	Fatty Acyls	Lineolic acids and derivatives	C14827	Lipid metabolism	29774-12-7	HMDB0006940	Nodiff
M295T563_1.neg	2.2538e+06	1.60374e+06	0.711573	-0.490915	0.283708	0.879241	3.62701e+06	2.50694e+06	3.33565e+06	1.61793e+06	1.60829e+06	826972	901047	645916	1.47446e+06	1.48509e+06	1.54379e+06	3.57215e+06	1.01422	9,10-Epoxyoctadecenoic acid	295.219	563.1	296.235	28.5347	C18H32O3	[M-H]-	Fatty Acyls	Fatty acids and conjugates	C14825	Lipid metabolism		HMDB0004701	Nodiff
M296T105.pos	2.8164e+07	2.77965e+07	0.986951	-0.0189495	0.82623	0.954544	5.30249e+07	2.51183e+07	4.77004e+07	1.006e+07	2.63264e+07	6.75405e+06	2.75916e+07	8.85243e+06	4.49835e+07	1.49689e+07	3.16101e+07	3.87724e+07	0.110684	Sumatriptan	296.135	104.5	295.135	10.7109	C14H21N3O2S	[M+H]+	Indoles and derivatives	Tryptamines and derivatives	C07319		103628-46-2	HMDB0005037	Nodiff
M297T554.pos	2.59597e+08	1.16825e+08	0.450023	-1.15193	0.0586698	0.492171	3.47996e+08	2.67706e+08	4.58142e+08	1.86311e+08	1.91404e+08	1.06026e+08	4.91419e+07	6.22523e+07	1.57922e+07	1.57559e+08	1.51684e+08	2.6452e+08	1.74792	9,10-DHOME	297.243	554	314.246	0.258248	C18H34O4	[M+H-H2O]+	Fatty Acyls	Fatty acids and conjugates	C14828	Lipid metabolism	263399-34-4	HMDB0004704	Nodiff
M297T567.neg	3.32456e+08	3.1533e+08	0.948485	-0.0763031	0.786569	0.963023	1.13283e+09	1.2722e+08	3.4928e+08	1.81462e+08	9.99624e+07	1.0398e+08	3.71128e+08	1.74265e+08	4.14994e+08	6.44236e+07	1.90802e+08	6.76366e+08	0.267338	Nonadecanoic acid	297.244	566.6	298.287	0.238521	C19H38O2	[M-H]-	Fatty Acyls	Fatty acids and conjugates	C16535		646-30-0	HMDB0000772	Nodiff
M298T652.pos	2.87105e+07	3.80939e+07	1.32683	0.407979	0.305435	0.742136	6.44169e+07	1.86187e+07	2.6027e+07	2.85758e+07	2.31879e+07	1.14369e+07	3.26923e+07	3.26654e+07	3.83709e+07	1.89733e+07	2.74221e+07	7.84393e+07	0.788986	Tridemorph	298.31	652.2	297.303	0.0804531	C19H39NO	[M+H]+	Oxazinanes	Morpholines	C11285		c("24602-86-6", "81412-43-3", "NA")	HMDB0031810	Nodiff
M299T558.neg	1.53122e+07	1.44519e+07	0.943814	-0.0834258	0.750897	0.955859	2.71097e+07	1.41428e+07	1.36768e+07	1.24065e+07	1.49183e+07	9.6191e+06	9.28137e+06	1.53959e+07	1.27545e+07	1.51716e+07	8.83601e+06	2.52719e+07	0.323243	all-trans-Retinoic acid	299.201	558.1	300.209	0.155525	C20H28O2	[M-H]-	Prenol lipids	Retinoids	C00777	Cancer: overview; Immune system; Metabolism of cofactors and vitamins; Cancer: specific types	302-79-4	HMDB0001852	Nodiff
M299T566.pos	2.0651e+07	2.03933e+07	0.987522	-0.0181147	0.606058	0.881888	3.79182e+07	3.36933e+07	1.45885e+06	1.96291e+07	2.35072e+07	7.69916e+06	1.68977e+07	8.46856e+06	2.14724e+07	1.33143e+07	2.6997e+07	3.52098e+07	0.500767	9,10-Dihydroxystearate	299.258	566.4	316.261	13.48	C18H36O4	[M+H-H2O]+			C19622				Nodiff
M300T443.pos	5.66815e+07	7.91107e+07	1.39571	0.480994	0.357327	0.773346	2.42925e+08	2.12602e+07	1.69559e+07	2.16334e+07	2.08121e+07	1.65023e+07	4.80767e+07	2.74596e+07	6.02034e+07	1.88649e+07	4.22971e+07	2.77763e+08	0.708509	Sphingosine	300.291	442.9	299.282	0.817224	C18H37NO2	[M+H]+	Organonitrogen compounds	Amines	C00319	Lipid metabolism; Cell growth and death; Signal transduction	123-78-4	HMDB0000252	Nodiff
M300T611.pos	6.02469e+07	2.87175e+07	0.476664	-1.06896	0.928075	0.981668	2.96086e+07	1.8087e+06	1.09141e+08	1.87347e+06	8.40365e+07	1.35013e+08	1.0838e+07	7.58607e+07	1.76699e+07	1.0044e+07	1.10133e+07	4.68791e+07	0.0799424	Palmitoylethanolamide	300.289	611.2	299.282	1.58514	C18H37NO2	[M+H]+	Carboximidic acids and derivatives	Carboximidic acids	C16512	Signaling molecules and interaction	544-31-0	HMDB0002100	Nodiff
M301T519.pos	2.70056e+07	2.91472e+07	1.0793	0.110101	0.523429	0.85252	4.84859e+07	2.58451e+07	2.03113e+07	3.10582e+07	2.52247e+07	1.11082e+07	1.95151e+07	3.31287e+07	2.59524e+07	3.83677e+07	2.71674e+07	3.07519e+07	0.429938	9-cis-Retinoic acid	301.216	519.5	300.209	2.24424	C20H28O2	[M+H]+	Prenol lipids	Retinoids	C15493	Cancer: overview; Metabolism of cofactors and vitamins; Endocrine system; Cancer: specific types; Immune system	5300-03-08	HMDB0002369	Nodiff
M301T554.neg	3.85771e+06	3.8298e+06	0.992765	-0.0104765	0.52656	0.914779	1.11792e+07	1.82038e+06	2.68056e+06	3.64854e+06	2.71571e+06	1.10188e+06	2.92963e+06	4.31482e+06	3.05546e+06	3.58284e+06	2.66387e+06	6.43217e+06	0.626624	Quercetin	301.166	554.1	302.043	20.4304	C15H10O7	[M-H]-	Flavonoids	Flavones	C00389	Signal transduction	117-39-5	HMDB0005794	Nodiff
M302T452.pos	7.35958e+06	1.36582e+07	1.85584	0.892069	0.238851	0.70182	3.51849e+06	2.1722e+07	1.85477e+06	1.27535e+07	1.67051e+06	2.63818e+06	1.93003e+07	1.55308e+06	1.49623e+07	4.37927e+06	2.39145e+07	1.78397e+07	1.02818	Sphinganine	302.305	452	301.298	0	C18H39NO2	[M+H]+	Organonitrogen compounds	Amines	C00836	Lipid metabolism; Signal transduction	764-22-7	HMDB0000269	Nodiff
M303T513.pos	3.73076e+07	4.31153e+07	1.15567	0.208732	0.351676	0.771121	1.55184e+08	2.2302e+07	9.42716e+06	2.50948e+07	7.32813e+06	4.50897e+06	4.07303e+07	1.92027e+07	5.91566e+07	7.32738e+06	3.39984e+07	9.82764e+07	0.748472	19(R)-HETE	303.231	513	320.235	10.8469	C20H32O3	[M+H-H2O]+	Endogenous Metabolites		C14749	Lipid metabolism	115461-39-7		Nodiff
M303T523.pos	2.60965e+08	2.6362e+08	1.01018	0.0146056	0.736979	0.930796	4.65602e+08	2.33137e+08	4.01062e+08	1.69465e+08	1.82864e+08	1.13657e+08	2.31765e+08	1.96668e+08	3.28387e+08	1.96842e+08	2.1261e+08	4.15448e+08	0.144643	16(R)-HETE	303.231	523.4	320.235	4.94673	C20H32O3	[M+H-H2O]+	Fatty Acyls	Eicosanoids	C14778	Lipid metabolism	183509-22-0	HMDB0004680	Nodiff
M303T532.pos	6.42023e+08	6.59168e+08	1.0267	0.0380196	0.462688	0.824076	2.09281e+09	3.35988e+08	3.61627e+08	4.86522e+08	3.94908e+08	1.80291e+08	2.98833e+08	1.0507e+09	5.54518e+08	5.60871e+08	5.75784e+08	9.14302e+08	0.519928	8-HETE	303.231	532.3	320.235	4.28716	C20H32O3	[M+H-H2O]+	Fatty Acyls	Eicosanoids	C14776	Lipid metabolism; Endocrine system	98462-03-4	HMDB0004679	Nodiff
M304T650.neg	5.38319e+07	2.85921e+07	0.531137	-0.912843	0.802773	0.965497	1.87491e+08	3.79031e+07	4.1244e+07	3.12191e+07	2.01772e+07	4.95664e+06	2.5046e+07	1.98305e+07	3.98513e+07	1.97162e+07	2.63548e+07	4.0754e+07	0.222029	Arachidonic acid	304.237	649.5	304.24	11.8329	C20H32O2	[M]-	Fatty Acyls	Fatty acids and conjugates	C00219	Circulatory system; Cell growth and death; Nervous system; Sensory system; Endocrine system; Lipid metabolism; Immune system; Infectious disease: parasitic	506-32-1	HMDB0001043	Nodiff
M306T466.pos	1.01882e+07	1.28351e+07	1.25979	0.333185	0.583748	0.874144	6.02745e+06	3.58907e+06	1.44432e+07	8.0241e+06	1.89888e+07	1.00568e+07	1.34416e+07	3.28351e+06	1.54221e+07	2.23532e+07	7.42226e+06	1.50878e+07	0.491417	8,11,14-Eicosatrienoic acid	306.243	466.3	306.256	26.2565	C20H34O2	[M]+	Fatty Acyls	Fatty acids and conjugates	C03242	Lipid metabolism	1783-84-2	HMDB0002925	Nodiff
M308T535.pos	1.02116e+07	1.11815e+07	1.09499	0.130916	0.573863	0.870667	4.59559e+06	4.29257e+06	2.50098e+07	8.63014e+06	4.30316e+06	1.44381e+07	4.60891e+06	1.27757e+07	2.25457e+07	8.09913e+06	8.65024e+06	1.04096e+07	0.527012	Eicosadienoic acid	308.279	535.1	308.272	25.3024	C20H36O2	[M]+	Carboxylic acids and derivatives	Carbonyl compounds	C16525	Lipid metabolism	2091-39-6/5598-38-9	HMDB0005060	Nodiff
M309T396.pos	1.79177e+07	1.4342e+07	0.800435	-0.321144	0.503269	0.844807	1.90287e+07	2.17306e+07	2.86463e+07	2.28472e+07	9.11407e+06	6.13958e+06	1.27893e+07	5.57996e+06	1.63691e+07	9.7303e+06	1.02751e+07	3.13081e+07	0.692233	2,3-Dinor-8-iso prostaglandin F2alpha	309.205	395.8	326.209	1.10809	C18H30O5	[M+H-H2O]+			C14794	Lipid metabolism	221664-05-7		Nodiff
M309T452.neg	1.0136e+07	2.10515e+07	2.07692	1.05444	0.0533299	0.796789	3.81622e+06	9.44926e+06	1.54313e+07	1.37432e+06	1.95031e+07	1.12416e+07	1.50834e+07	2.4186e+07	2.61273e+07	1.75209e+07	2.03941e+07	2.29975e+07	1.89295	Ribose 1,5-bisphosphate	309.174	451.7	309.986	1.40148	C5H12O11P2	[M-H]-	Organooxygen compounds	Carbohydrates and carbohydrate conjugates	C01151	Carbohydrate metabolism; Metabolism of other amino acids	14689-84-0	HMDB0011688	Nodiff
M309T586_1.pos	1.79809e+06	3.43872e+06	1.91243	0.935404	0.41038	0.799461	2.63318e+06	1.48392e+06	1.70389e+06	3.16447e+06	1.12267e+06	680415	2.86794e+06	706853	7.13243e+06	2.19253e+06	837571	6.89499e+06	0.687526	Nadolol	309.196	586.3	309.194	0.0739064	C17H27NO4	[M]+			C07249		42200-33-9		Nodiff
M310T51_2.neg	1.22195e+07	1.31789e+07	1.07851	0.109039	0.554004	0.918925	1.12563e+07	9.48328e+06	1.00781e+07	1.42521e+07	1.07048e+07	1.75425e+07	1.67508e+07	9.85128e+06	1.49662e+07	1.21705e+07	1.0335e+07	1.49995e+07	0.539779	trans-Cinnamoyl beta-D-glucoside	310.114	50.9	310.105	28.3775	C15H18O7	[M]-	Benzene and substituted derivatives	Alcohols and polyols	C04164				Nodiff
M310T52.pos	5.16588e+07	5.38134e+07	1.04171	0.0589506	0.878104	0.969643	7.75149e+07	4.86642e+07	7.69548e+07	3.86502e+07	4.21634e+07	2.60052e+07	6.9828e+07	2.22551e+07	7.55645e+07	5.94965e+07	4.03794e+07	5.53567e+07	0.0252638	N-Acetylneuraminic acid	310.113	51.7	309.106	0.00456613	C11H19NO9	[M+H]+	Organooxygen compounds	Carbohydrates and carbohydrate conjugates	C19910		131-48-6	HMDB0000230	Nodiff
M310T540.pos	6.76551e+07	7.27913e+07	1.07592	0.105568	0.316156	0.748613	2.26796e+08	1.8857e+07	3.11573e+07	8.71586e+07	3.09446e+07	1.10168e+07	5.37704e+07	7.80164e+07	8.61226e+07	4.28055e+07	4.44872e+07	1.31546e+08	0.801501	N,N-Dimethylsphing-4-enine	310.31	540.3	327.314	12.3554	C20H41NO2	[M+H-H2O]+	Organonitrogen compounds	Amines	C13914		c("122314-67-4", "119567-63-4")	HMDB0013645	Nodiff
M311T340.neg	5.87189e+06	8.15513e+06	1.38884	0.473883	0.379051	0.894098	2.48755e+06	2.83413e+06	6.45995e+06	1.22647e+07	4.11822e+06	7.06682e+06	1.1418e+07	1.2163e+07	1.13146e+07	7.72738e+06	3.43906e+06	2.86882e+06	0.850672	9,10,13-TriHOME	311.222	340.5	330.241	0.996073	C18H34O5	[M-H2O-H]-	Carboxylic acids and derivatives	Alcohols and polyols	C14835	Lipid metabolism	29907-57-1	HMDB0004710	Nodiff
M311T344.pos	4.85076e+06	3.38994e+06	0.698847	-0.516952	0.465733	0.825118	9.31008e+06	1.39665e+06	6.38089e+06	6.43019e+06	3.82123e+06	1.76552e+06	952053	2.03804e+06	2.42892e+06	3.64553e+06	6.50485e+06	4.77023e+06	0.730068	2,3-Dinor-8-iso prostaglandin F1alpha	311.221	343.7	328.225	11.6767	C18H32O5	[M+H-H2O]+	Carboxylic acids and derivatives	Alcohols and polyols	C14795	Lipid metabolism			Nodiff
M311T690.neg	1.18276e+07	4.91084e+06	0.415202	-1.26812	0.594506	0.926481	1.22373e+07	3.00173e+07	2.31736e+07	897840	789637	3.8499e+06	347923	3.27214e+06	4.21203e+06	1.02981e+07	5.57629e+06	5.75858e+06	0.535469	Arachidic acid	311.296	689.5	312.303	1.50266	C20H40O2	[M-H]-	Fatty Acyls	Fatty acids and conjugates	C06425	Lipid metabolism	506-30-9	HMDB0002212	Nodiff
M312T521.pos	2.00125e+07	1.9145e+07	0.95665	-0.0639363	0.379153	0.784991	7.99246e+07	7.54675e+06	1.11865e+07	1.21743e+07	8.29255e+06	950297	1.4541e+07	1.41732e+07	2.46479e+07	8.93097e+06	1.16345e+07	4.09422e+07	0.663851	Aflatoxin B1	312.363	521.1	312.063	0.0315764	C17H12O6	[M]+	Coumarins and derivatives	Furanocoumarins	C06800	Xenobiotics biodegradation and metabolism; Cancer: specific types	1162-65-8	HMDB0006552	Nodiff
M313T378.neg	8.67346e+06	9.72485e+06	1.12122	0.165068	0.409831	0.901554	1.23046e+07	5.43583e+06	1.06573e+07	8.06479e+06	9.84677e+06	5.73152e+06	6.93229e+06	8.02073e+06	1.12743e+07	1.15124e+07	9.13654e+06	1.14728e+07	0.818376	12,13-DHOME	313.238	378.4	314.246	0.242627	C18H34O4	[M-H]-	Fatty Acyls	Fatty acids and conjugates	C14829	Lipid metabolism		HMDB0004705	Nodiff
M313T529.pos	6.01158e+06	1.2919e+07	2.14902	1.10368	0.183015	0.662399	1.53515e+07	1.42915e+06	1.2989e+06	2.26606e+06	9.2e+06	6.52391e+06	1.33105e+06	1.04246e+07	1.41082e+07	7.16588e+06	2.10181e+07	2.34663e+07	1.14613	9,12,13-TriHOME	313.237	529.2	330.241	13.1978	C18H34O5	[M+H-H2O]+	Carboxylic acids and derivatives	Alcohols and polyols	C14833	Lipid metabolism	97134-11-7	HMDB0004708	Nodiff
M316T379.pos	8.22234e+06	2.43866e+06	0.296589	-1.75346	0.239841	0.703252	645866	497623	1.25101e+07	1.14805e+06	1.18545e+07	2.26779e+07	1.78375e+06	1.02352e+07	523494	1.34271e+06	354243	392510	0.948875	Decanoyl-L-carnitine	316.248	378.5	315.241	0.00146583	C17H33NO4	[M+H]+			C03299		3992-45-8	HMDB00651	Nodiff
M317T505.pos	1.33949e+07	1.95786e+07	1.46165	0.547599	0.0438637	0.478351	1.39803e+07	1.12614e+07	1.21046e+07	1.45653e+07	1.32143e+07	1.52432e+07	1.64986e+07	1.53652e+07	3.48133e+07	1.70026e+07	1.8055e+07	1.5737e+07	1.82008	Delta-12-Prostaglandin J2	317.21	504.8	334.214	10.1951	C20H30O4	[M+H-H2O]+	Fatty Acyls	Eicosanoids	C05958	Lipid metabolism	87893-54-7	HMDB0004238	Up
M317T509.neg	1.48579e+07	2.74078e+07	1.84465	0.883351	0.129005	0.838988	2.21165e+07	2.22067e+07	2.72443e+07	265212	354629	1.69603e+07	2.6896e+07	2.46089e+07	3.64471e+07	2.68778e+07	2.50713e+07	2.45456e+07	1.49097	15-KETE	317.212	508.6	318.219	0.689823	C20H30O3	[M-H]-	Fatty Acyls	Fatty acids and conjugates	C04577	Lipid metabolism	81416-72-0	HMDB0010210	Nodiff
M317T529.pos	7.75955e+07	1.25223e+08	1.61379	0.690457	0.138162	0.607466	3.38956e+07	1.38783e+08	9.56719e+07	6.46028e+07	1.0526e+08	2.73595e+07	1.442e+08	2.39334e+08	5.46885e+07	1.0773e+08	1.11303e+08	9.40832e+07	1.192	12-Keto-leukotriene B4	317.209	528.7	334.214	7.04267	C20H30O4	[M+H-H2O]+	Fatty Acyls	Eicosanoids	C05949	Lipid metabolism	136696-10-1	HMDB0004234	Nodiff
M317T538.pos	1.75512e+08	1.59143e+08	0.906735	-0.141247	0.820859	0.953273	3.29612e+08	1.95428e+08	6.0163e+07	2.32193e+08	2.14433e+08	2.12454e+07	8.74807e+07	2.1397e+08	5.70896e+07	1.61751e+08	2.03037e+08	2.31532e+08	0.0982184	15-Deoxy-d-12,14-PGJ2	317.209	537.5	316.204	5.91408	C20H28O3	[M+H]+	Fatty Acyls	Eicosanoids	C14717	Lipid metabolism	87893-55-8	HMDB0005079	Nodiff
M318T529.pos	1.2712e+07	5.09584e+06	0.40087	-1.3188	0.26206	0.714883	1.142e+06	943637	2.56741e+07	2.2882e+06	2.48714e+07	2.13525e+07	3.46155e+06	2.16739e+07	1.61237e+06	2.91747e+06	158444	751283	0.911833	Nateglinide	318.212	528.7	317.199	17.0453	C19H27NO3	[M+H]+	Carboxylic acids and derivatives	Amino acids, peptides, and analogues	C12508		105816-04-4	HMDB0014869	Nodiff
M319T412.pos	8.70001e+07	8.84765e+07	1.01697	0.0242761	0.594645	0.876947	3.75507e+08	4.87546e+07	3.51052e+07	2.14579e+07	2.1185e+07	1.99915e+07	4.08077e+07	4.5179e+07	3.33145e+07	6.08806e+07	3.32262e+07	3.17451e+08	0.271451	5(S)-HpETE	319.226	411.9	336.23	0.923904	C20H32O4	[M+H-H2O]+			C05356	Lipid metabolism; Nervous system; Endocrine system	71774-08-8		Nodiff
M319T434.pos	3.06736e+07	3.29736e+07	1.07499	0.104317	0.871622	0.968779	6.01056e+07	2.02175e+07	2.29131e+07	3.94053e+07	2.17267e+07	1.96732e+07	2.61858e+07	1.3915e+07	4.02e+07	3.80875e+07	1.83753e+07	6.10783e+07	0.0492965	9(S)-HPETE	319.227	433.6	336.23	12.3237	C20H32O4	[M+H-H2O]+	Carboxylic acids and derivatives	Alkyl hydroperoxides	C14821	Lipid metabolism; Nervous system			Nodiff
M319T499.pos	5.32666e+07	1.02746e+08	1.92889	0.947773	0.00451353	0.325233	4.50697e+07	6.53757e+07	3.85806e+07	3.28678e+07	9.10174e+07	4.66882e+07	1.03592e+08	1.44499e+08	1.22559e+08	8.39374e+07	8.57516e+07	7.61334e+07	2.16027	12-KETE	319.226	499.3	318.219	1.49111	C20H30O3	[M+H]+	Fatty Acyls	Fatty acids and conjugates	C14807	Lipid metabolism	108437-64-5	HMDB0013633	Up
M319T524_2.pos	6.48424e+06	3.97612e+06	0.613197	-0.705577	0.586684	0.875386	6.76396e+06	863577	3.74932e+06	1.84988e+06	7.89358e+06	1.77851e+07	1.88062e+06	5.47803e+06	3.31366e+06	8.45087e+06	724190	4.00935e+06	0.481839	Prostaglandin B1	319.23	523.6	336.23	22.974	C20H32O4	[M+H-H2O]+	Fatty Acyls	Eicosanoids	C00959		13345-51-2	HMDB0002982	Nodiff
M319T555.pos	4.98456e+07	5.92792e+07	1.18926	0.250061	0.369614	0.779797	5.85523e+07	9.68932e+07	1.03293e+07	4.94492e+07	6.043e+07	2.34197e+07	2.89709e+07	6.62663e+07	6.51872e+07	8.29471e+07	5.62674e+07	5.60365e+07	0.811719	5-KETE	319.226	555	318.219	3.37066	C20H30O3	[M+H]+	Fatty Acyls	Fatty acids and conjugates	C14732	Lipid metabolism	126432-17-5/106154-18-1	HMDB0010217	Nodiff
M320T499.pos	4.89959e+07	2.51004e+07	0.512296	-0.964951	0.508308	0.84632	6.65433e+07	9.97403e+07	8.77377e+07	1.88149e+07	1.50109e+07	6.12847e+06	1.8269e+07	2.3396e+07	3.51367e+07	1.39609e+07	1.17013e+07	4.81385e+07	0.726205	20-HETE	320.228	499.4	320.235	23.7326	C20H32O3	[M]+	Carboxylic acids and derivatives	Alcohols and polyols	C14748	Lipid metabolism; Circulatory system	79551-86-3	HMDB0005998	Nodiff
M321T502.pos	1.16023e+07	1.40875e+07	1.21419	0.28	0.0755134	0.517494	8.4656e+06	1.58735e+07	1.00178e+07	1.10163e+07	1.28113e+07	1.14295e+07	1.32592e+07	1.13691e+07	1.62471e+07	1.4962e+07	1.51257e+07	1.35618e+07	1.56157	5,6-DHET	321.241	502.3	338.246	10.0672	C20H34O4	[M+H-H2O]+	Fatty Acyls	Eicosanoids	C14772	Lipid metabolism; Nervous system	213382-49-1	HMDB0002343	Nodiff
M321T523.pos	1.4904e+07	6.53702e+06	0.438609	-1.18899	0.131627	0.598784	3.0078e+07	1.36049e+07	2.09905e+07	1.13319e+07	1.09957e+07	2.42271e+06	9.38491e+06	2.94915e+06	7.88961e+06	1.03522e+07	3.71211e+06	4.93415e+06	1.39364	8,9-EET	321.242	523.2	320.235	1.48175	C20H32O3	[M+H]+	Fatty Acyls	Fatty acids and conjugates	C14769	Circulatory system; Nervous system; Sensory system; Endocrine system; Lipid metabolism	81246-85-7 / NA	HMDB0002232	Nodiff
M321T562.pos	1.91148e+07	4.47255e+07	2.33984	1.22641	0.240224	0.703346	2.86431e+07	1.25592e+07	1.47345e+07	1.87157e+07	7.07434e+06	3.29618e+07	8.72924e+06	6.0039e+07	4.1366e+07	1.22463e+08	1.3145e+07	2.26103e+07	0.940112	8,9-DiHETrE	321.242	561.7	338.246	11.9349	C20H34O4	[M+H-H2O]+	Fatty Acyls	Eicosanoids	C14773	Lipid metabolism; Nervous system	192461-96-4	HMDB0002311	Nodiff
M323T569.pos	3.44985e+07	4.17405e+07	1.20992	0.274915	0.211587	0.683966	4.934e+07	4.82129e+07	3.05432e+07	3.86225e+07	1.96216e+07	2.06509e+07	4.23441e+07	3.75918e+07	3.91929e+07	4.03258e+07	3.57795e+07	5.52089e+07	0.937301	CMP	323.258	569.5	323.052	26.9409	C9H14N3O8P	[M]+	Pyrimidine nucleotides	Pyrimidine ribonucleotides	C00055	Nucleotide metabolism	63-37-6	HMDB0000095	Nodiff
M324T46.neg	4.99869e+06	2.68009e+06	0.536158	-0.899269	0.263256	0.87734	9.23738e+06	4.44727e+06	6.14087e+06	7.4128e+06	2.49345e+06	260362	386055	79856	2.56527e+06	1.83526e+06	1.85081e+06	9.36328e+06	1.04642	N-Glycolylneuraminic acid	324.094	46.4	325.101	0.0611181	C11H19NO10	[M-H]-	Organooxygen compounds	Carbohydrates and carbohydrate conjugates	C03410	Carbohydrate metabolism	1113-83-3	HMDB0000833	Nodiff
M325T657.neg	9.5027e+07	8.60379e+07	0.905405	-0.143365	0.827141	0.969101	2.16726e+08	3.33948e+07	1.30223e+08	6.68883e+07	9.06802e+07	3.22504e+07	6.99022e+07	3.91057e+07	8.98082e+07	4.40544e+07	4.22644e+07	2.31093e+08	0.210068	11-Dehydrocorticosterone	325.184	657.5	344.199	10.7324	C21H28O4	[M-H2O-H]-	Steroids and steroid derivatives	Hydroxysteroids	C05490	Lipid metabolism	72-23-1	HMDB0004029	Nodiff
M326T604_1.pos	2.89906e+08	3.12933e+08	1.07943	0.110271	0.510458	0.846885	7.58559e+07	3.51703e+08	3.83337e+08	3.12888e+08	3.83822e+08	2.31828e+08	2.91561e+08	2.8218e+08	2.54985e+08	3.06269e+08	4.23491e+08	3.19112e+08	0.65774	Oleoylethanolamide	326.305	604.4	325.298	2.37815	C20H39NO2	[M+H]+	Organonitrogen compounds	Amines	C20792	Signal transduction	111-58-0	HMDB0002088	Nodiff
M327T514_1.pos	1.04079e+07	7.94404e+06	0.76327	-0.389735	0.830761	0.955465	2.38925e+07	1.53356e+07	1.23129e+07	3.42425e+06	6.68424e+06	798070	1.17143e+07	4.90856e+06	1.12826e+07	5.46041e+06	9.08316e+06	5.21519e+06	0.0848192	Triphenyl phosphate	327.077	514.2	326.071	1.30939	C18H15O4P	[M+H]+			C14235		115-86-6		Nodiff
M327T516.pos	7.13872e+06	1.59639e+07	2.23624	1.16108	0.0779471	0.52151	1.59066e+07	2.07146e+06	892213	4.39883e+06	1.94762e+07	87055.8	2.33564e+07	2.30892e+07	1.41935e+07	1.17385e+07	1.08742e+07	1.25317e+07	1.51822	Formoterol	327.159	515.9	344.174	22.5151	C19H24N2O4	[M+H-H2O]+	Benzene and substituted derivatives	Phenethylamines	C07805		73573-87-2	HMDB0015118	Nodiff
M329T253.pos	2.12423e+06	972928	0.458016	-1.12653	0.45992	0.823409	5.58344e+06	1.67043e+06	3.02715e+06	1.96265e+06	271575	230098	377614	325675	449526	1.11988e+06	1.50798e+06	2.0569e+06	0.84651	(S)-Reticuline	329.149	253.4	329.163	1.07255	C19H23NO4	[M]+	Isoquinolines and derivatives	Benzylisoquinolines	C02105		485-19-8	HMDB0003601	Nodiff
M329T549.pos	2.79571e+06	3.07171e+06	1.09872	0.135829	0.653992	0.899558	2.55342e+06	2.71062e+06	3.4094e+06	2.80242e+06	2.6573e+06	2.6411e+06	3.14538e+06	1.68882e+06	3.80002e+06	3.08618e+06	3.98683e+06	2.72305e+06	0.431364	Docosahexaenoic acid	329.248	549	328.24	1.51861	C22H32O2	[M+H]+	Fatty Acyls	Fatty acids and conjugates	C06429	Lipid metabolism	6217-54-5	HMDB0002183	Nodiff
M329T613_2.neg	4.50502e+09	1.18794e+10	2.63691	1.39885	0.39397	0.896064	2.66432e+09	2.07944e+09	2.61961e+09	1.22679e+09	1.05632e+10	7.87681e+09	6.92283e+09	4.36812e+10	2.35339e+09	1.18372e+10	5.51277e+09	9.68771e+08	0.819158	Docosapentaenoic acid (22n-3)	329.248	612.9	330.256	1.21489	C22H34O2	[M-H]-	Fatty Acyls	Fatty acids and conjugates	C16513	Lipid metabolism	24880-45-3	HMDB0006528	Nodiff
M331T602.pos	2.92208e+06	4.0361e+06	1.38124	0.465964	0.269124	0.71835	4.91191e+06	1.09507e+06	4.00835e+06	989878	1.25107e+06	5.27623e+06	3.60929e+06	5.14262e+06	5.17787e+06	4.28223e+06	1.19872e+06	4.80586e+06	0.868288	Ethyl icosapentate	331.262	602.5	330.256	2.04068	C22H34O2	[M+H]+	Fatty Acyls	Fatty acid esters	C16184		86227-47-6/NA	HMDB0039530	Nodiff
M331T645.neg	2.69599e+09	3.69811e+09	1.37171	0.455972	0.518249	0.914477	6.71907e+09	2.82145e+09	8.53263e+08	1.10371e+09	4.52164e+09	1.56807e+08	8.25196e+08	7.98116e+09	6.01416e+08	6.70074e+09	3.97313e+09	2.107e+09	0.655234	Adrenic acid	331.264	644.5	332.272	0.978072	C22H36O2	[M-H]-	Fatty Acyls	Fatty acids and conjugates	C16527	Lipid metabolism; Cell growth and death	28874-58-0	HMDB0002226	Nodiff
M333T469.neg	3.10039e+06	2.83955e+06	0.915869	-0.126787	0.330329	0.88582	1.36029e+07	721392	1.58248e+06	1.41131e+06	1.13675e+06	147490	1.43181e+06	2.85129e+06	4.29824e+06	1.5326e+06	1.43891e+06	5.48444e+06	0.98341	Lipoxin B4	333.207	468.7	352.225	0.0300114	C20H32O5	[M-H2O-H]-	Fatty Acyls	Eicosanoids	C06315	Lipid metabolism	98049-69-5/92950-25-9	HMDB0005082	Nodiff
M333T520.pos	2.81875e+07	1.03541e+07	0.36733	-1.44485	0.227182	0.697673	1.32725e+07	8.9613e+07	9.51385e+06	1.04661e+07	3.91913e+07	7.06839e+06	9.95947e+06	7.69751e+06	1.05011e+07	1.14393e+07	1.05714e+07	1.1956e+07	1.0712	15-Keto-prostaglandin E2	333.203	520.2	350.209	4.3037	C20H30O5	[M+H-H2O]+	Carboxylic acids and derivatives	Acryloyl compounds	C04707		26441-05-4	HMDB0003175	Nodiff
M334T398.pos	2.10928e+06	2.39459e+06	1.13526	0.183027	0.483442	0.836173	899535	1.29246e+06	1.79619e+06	3.24542e+06	2.92428e+06	2.49781e+06	2.06388e+06	1.73495e+06	2.06754e+06	4.14753e+06	1.90084e+06	2.45282e+06	0.685074	Nicotinamide ribotide	334.295	397.6	334.057	1.17233	C11H15N2O8P	[M]+	Pyridine nucleotides	Nicotinamide nucleotides	C00455	Metabolism of cofactors and vitamins	1094-61-7	HMDB0000229	Nodiff
M335T375.pos	1.41175e+08	5.36226e+07	0.37983	-1.39658	0.0684708	0.505623	1.19372e+08	2.10815e+08	2.21223e+08	1.82918e+08	9.26507e+07	2.00736e+07	1.63804e+07	2.00796e+07	4.84084e+07	4.42211e+07	4.63986e+07	1.46248e+08	1.56942	Prostaglandin F3a	335.221	374.5	352.225	0.486611	C20H32O5	[M+H-H2O]+	Fatty Acyls	Eicosanoids	C06476		745-64-2	HMDB0002122	Nodiff
M335T437.neg	3.49953e+07	3.83462e+07	1.09575	0.131922	0.3426	0.886396	3.3854e+07	9.21238e+07	2.22445e+07	2.72917e+07	1.74146e+07	1.70434e+07	3.60367e+07	3.00855e+07	3.3771e+07	4.9817e+07	4.24357e+07	3.79314e+07	0.970004	(5Z,9E,14Z)-(8xi,11xi,12S)-8,11,12-Trihydroxyicosa-5,9,14-trienoate	335.221	436.8	354.241	3.01293	C20H34O5	[M-H2O-H]-	Carboxylic acids and derivatives	Alcohols and polyols	C04843				Nodiff
M335T439.pos	2.02477e+07	4.08054e+07	2.01531	1.011	0.362512	0.777099	1.1445e+07	1.24535e+07	1.3495e+07	1.35857e+07	1.57601e+07	5.47468e+07	1.69815e+07	3.18589e+07	1.45999e+08	1.12602e+07	2.52732e+07	1.346e+07	0.993093	13,14-Dihydro-15-keto-PGE2	335.223	439.2	352.225	1.28879	C20H32O5	[M+H-H2O]+	Fatty Acyls	Eicosanoids	C04671		363-23-5	HMDB0002776	Nodiff
M335T453.neg	5.74379e+07	1.58838e+08	2.76539	1.46749	0.00366389	0.663929	8.53578e+07	5.43795e+07	2.63547e+07	5.11026e+07	9.40195e+07	3.34134e+07	1.13372e+08	1.17668e+08	1.88018e+08	1.06363e+08	1.10864e+08	3.16745e+08	2.36576	(5Z,9E,14Z)-(8xi,11R,12S)-11,12-epoxy-8-hydroxyicosa-5,9,14-trienoic Acid	335.222	453.3	336.23	2.38648	C20H32O4	[M-H]-	Fatty Acyls	Eicosanoids	C04849			HMDB0062619	Up
M335T461.pos	4.63363e+07	4.29391e+07	0.926684	-0.10985	0.716024	0.924241	4.30025e+07	6.60893e+07	6.15807e+07	3.92309e+07	3.32172e+07	3.48969e+07	3.81179e+07	3.65639e+07	3.83192e+07	4.69543e+07	4.15181e+07	5.6161e+07	0.512421	Prostaglandin-c2	335.221	461.5	334.214	2.30373	C20H30O4	[M+H]+	Fatty Acyls	Eicosanoids	C05955	Lipid metabolism; Nervous system	49825-91-4	HMDB0060095	Nodiff
M335T480.pos	1.12224e+08	2.90061e+07	0.258466	-1.95196	0.0726682	0.511264	1.01566e+08	2.10515e+08	2.34667e+08	1.68099e+07	8.75674e+07	2.22194e+07	1.7902e+07	1.77863e+07	4.41073e+07	3.99618e+07	4.35574e+07	1.07216e+07	1.55775	Prostaglandin B2	335.22	479.6	334.214	6.19296	C20H30O4	[M+H]+	Fatty Acyls	Eicosanoids	C05954	Lipid metabolism; Nervous system	13367-85-6	HMDB0004236	Nodiff
M335T621_2.pos	1.31922e+07	3.32639e+06	0.252148	-1.98766	0.07208	0.511026	2.03994e+07	2.56003e+07	2.40483e+07	2.4063e+06	4.18557e+06	2.51345e+06	2.59231e+06	766143	6.95416e+06	1.51812e+06	6.05224e+06	2.07541e+06	1.52636	Prostaglandin E2	335.219	621	352.225	4.87442	C20H32O5	[M+H-H2O]+	Fatty Acyls	Eicosanoids	C00584	Cancer: overview; Nervous system; Signal transduction; Sensory system; Endocrine system; Digestive system; Lipid metabolism; Signaling molecules and interaction; Immune disease; Immune system; Infectious disease: parasitic; Infectious disease: viral	363-24-6	HMDB0001220	Nodiff
M336T291_1.pos	1.9319e+07	1.15256e+07	0.596592	-0.745183	0.157664	0.632797	3.09787e+07	2.24275e+07	2.86604e+07	1.33155e+07	1.40385e+07	6.49362e+06	1.69252e+07	5.96771e+06	1.23795e+07	5.0641e+06	1.21284e+07	1.66886e+07	1.26144	Isopentenyl adenosine	336.166	291.1	335.159	1.02968	C15H21N5O4	[M+H]+			C16427		7724-76-7		Nodiff
M336T594.pos	6.53918e+07	6.0909e+07	0.931447	-0.102455	0.569931	0.868588	6.67055e+07	6.53748e+07	7.20274e+07	6.42174e+07	4.21906e+07	8.18352e+07	8.42898e+07	3.81797e+07	4.59802e+07	8.31298e+07	5.25507e+07	6.13238e+07	0.626144	12-Keto-tetrahydro-leukotriene B4	336.311	593.5	336.23	2.33274	C20H32O4	[M]+	Fatty Acyls	Eicosanoids	C02165	Sensory system; Nervous system; Digestive system; Endocrine system; Lipid metabolism; Signaling molecules and interaction	71160-24-2	HMDB0002995	Nodiff
M337T402.pos	6.41587e+06	5.30624e+06	0.827049	-0.273954	0.414504	0.801627	3.29796e+06	5.45563e+06	4.5741e+06	8.54843e+06	9.72181e+06	6.89731e+06	8.37888e+06	4.91218e+06	3.91688e+06	7.92528e+06	5.56857e+06	1.13568e+06	0.604531	11H-14,15-EETA	337.237	402	336.23	2.00452	C20H32O4	[M+H]+	Carboxylic acids and derivatives	Alcohols and polyols	C14813	Lipid metabolism	219535-29-2	HMDB0004693	Nodiff
M337T412.pos	4.37239e+07	4.23834e+07	0.969342	-0.0449222	0.975912	0.992885	3.03288e+07	3.46337e+07	6.08859e+07	3.0571e+07	6.85031e+07	3.7421e+07	3.85486e+07	3.87262e+07	2.68996e+07	5.11691e+07	3.99682e+07	5.89887e+07	0.112373	Prostaglandin F2a	337.237	411.9	354.241	10.4793	C20H34O5	[M+H-H2O]+	Fatty Acyls	Eicosanoids	C00639	Nervous system; Signal transduction; Digestive system; Endocrine system; Lipid metabolism; Signaling molecules and interaction	551-11-1	HMDB0001139	Nodiff
M337T45_1.pos	1.67111e+07	3.69284e+07	2.20981	1.14392	0.0930764	0.546235	2.76121e+07	2.84403e+07	3.2738e+06	3.8089e+07	1.87654e+06	975172	6.04438e+07	8.97235e+06	5.92069e+07	1.82067e+07	4.13318e+07	3.34089e+07	1.38077	Kyotorphin	337.171	45.3	337.175	0.994092	C15H23N5O4	[M]+	Carboxylic acids and derivatives	Amino acids, peptides, and analogues	C02993		70904-56-2	HMDB0005768	Nodiff
M337T500.pos	1.18489e+07	1.74764e+07	1.47493	0.560651	0.58575	0.875056	2.37124e+07	1.21671e+07	1.72342e+07	1.07286e+07	3.67566e+06	3.57571e+06	5.40836e+06	3.27566e+06	1.41774e+07	1.58291e+07	2.18401e+07	4.43278e+07	0.319358	Prostaglandin E1	337.238	499.8	354.241	1.24625	C20H34O5	[M+H-H2O]+	Fatty Acyls	Eicosanoids	C04741		745-65-3	HMDB0001442	Nodiff
M338T612_1.pos	1.15048e+10	1.52424e+10	1.32487	0.405854	0.0803246	0.525423	1.21482e+10	5.75931e+09	1.3781e+10	9.97935e+09	1.4e+10	1.3361e+10	1.40803e+10	1.33393e+10	2.00766e+10	1.36429e+10	1.43212e+10	1.5994e+10	1.5325	Erucic acid	338.341	612.1	338.318	0.0212491	C22H42O2	[M]+	Fatty Acyls	Fatty acids and conjugates	C08316	Lipid metabolism	112-86-7	HMDB0002068	Nodiff
M339T502.pos	8.80353e+06	1.02191e+07	1.16079	0.215108	0.155764	0.632155	8.7433e+06	8.84937e+06	5.68448e+06	9.56628e+06	1.14021e+07	8.5757e+06	8.94835e+06	1.08157e+07	1.01815e+07	1.21575e+07	9.83961e+06	9.37171e+06	1.30427	11,12-DiHETrE	339.253	502.3	338.246	0.0707437	C20H34O4	[M+H]+	Fatty Acyls	Eicosanoids	C14774	Lipid metabolism; Nervous system	192461-95-3 / NA	HMDB0002314	Nodiff
M339T606.neg	4.74382e+07	3.22634e+07	0.680115	-0.55615	0.466505	0.903209	1.03737e+08	3.84615e+07	4.98386e+07	5.35762e+07	2.47718e+07	1.42442e+07	2.92787e+07	2.2724e+07	3.53928e+07	3.02007e+07	2.67172e+07	4.92671e+07	0.713796	Fructose 1,6-bisphosphate	339.208	606.4	339.996	24.293	C6H14O12P2	[M-H]-	Organooxygen compounds	Carbohydrates and carbohydrate conjugates	C00354	Cancer: overview; Amino acid metabolism; Signal transduction; Endocrine system	488-69-7	HMDB0001058	Nodiff
M341T51.neg	1.21282e+06	1.71424e+06	1.41343	0.499203	0.513327	0.914337	723947	1.0381e+06	463059	1.53398e+06	1.62302e+06	1.89482e+06	3.2051e+06	557905	1.1752e+06	1.62148e+06	3.00302e+06	722743	0.643673	Trehalose	341.11	50.6	342.116	1.68861	C12H22O11	[M-H]-	Organooxygen compounds	Carbohydrates and carbohydrate conjugates	C01083	Carbohydrate metabolism; Membrane transport	99-20-7	HMDB0000975	Nodiff
M343T408.pos	5.6889e+06	1.37721e+07	2.42087	1.27552	0.106318	0.566976	2.25229e+07	3.89265e+06	6.80308e+06	299456	390186	225168	1.27246e+07	1.07355e+07	2.36065e+07	876229	5.08117e+06	2.96085e+07	1.24438	Sucrose	343.295	408.3	342.116	0.984248	C12H22O11	[M+H]+	Organooxygen compounds	Carbohydrates and carbohydrate conjugates	C00089	Carbohydrate metabolism; Membrane transport; Sensory system; Digestive system	57-50-1	HMDB0000258	Nodiff
M345T616.pos	3.8188e+07	2.30313e+07	0.603105	-0.729519	0.307646	0.744347	6.2392e+07	3.07476e+07	7.0637e+07	3.5535e+07	2.58772e+07	3.93897e+06	8.33861e+06	6.46156e+06	9.59323e+06	3.08201e+07	1.07173e+07	7.22572e+07	1.05817	Medroxyprogesterone	345.239	615.5	344.235	9.48908	C22H32O3	[M+H]+	Steroids and steroid derivatives	Pregnane steroids	C07119		520-85-4	HMDB0001939	Nodiff
M346T432_2.pos	8.69009e+06	3.82951e+06	0.440675	-1.18221	0.949221	0.986316	1.14704e+06	1.26541e+06	4.18633e+07	2.20133e+06	1.1528e+06	4.51064e+06	1.26791e+06	3.20363e+06	1.1759e+07	2.26613e+06	2.02515e+06	2.45526e+06	0.0570448	Cortexolone	346.331	431.7	346.214	1.73144	C21H30O4	[M]+	Steroids and steroid derivatives	Hydroxysteroids	C05488	Lipid metabolism; Endocrine and metabolic disease; Endocrine system	152-58-9	HMDB0000015	Nodiff
M346T466_2.pos	7.20995e+06	4.04978e+06	0.561693	-0.832146	0.150671	0.62517	9.78493e+06	28731.5	1.04517e+07	738153	1.08261e+07	1.14301e+07	26251.8	8.92165e+06	17622.7	1.52416e+07	6044.11	85448.3	1.28219	Cyclic GMP	346.331	466.4	345.047	1.60505	C10H12N5O7P	[M+H]+	Purine nucleotides	Cyclic purine nucleotides	C00942	Circulatory system; Nervous system; Signal transduction; Sensory system; Endocrine system; Digestive system; Environmental adaptation; Nucleotide metabolism; Cellular community - eukaryotes; Immune system	7665-99-8	HMDB0001314	Nodiff
M347T504_1.pos	1.57534e+08	1.25644e+08	0.797564	-0.326329	0.924175	0.980716	6.3633e+08	2.80353e+07	2.27337e+08	2.0911e+07	2.17876e+07	1.08064e+07	1.57198e+08	7.41393e+06	7.80582e+07	1.61193e+07	5.18679e+07	4.43205e+08	0.0477377	21-Deoxycortisol	347.219	504	346.214	7.70695	C21H30O4	[M+H]+	Steroids and steroid derivatives	Pregnane steroids	C05497	Lipid metabolism	641-77-0	HMDB0004030	Nodiff
M348T567.pos	8.00494e+07	3.60034e+07	0.449764	-1.15276	0.397622	0.793872	1.98822e+08	6.44931e+07	1.54219e+08	2.65041e+07	2.75226e+07	8.73611e+06	1.09272e+07	2.83082e+07	5.43865e+07	2.51357e+07	1.81564e+07	7.91061e+07	0.890992	Anandamide	348.289	567	347.282	0.505327	C22H37NO2	[M+H]+	Organonitrogen compounds	Amines	C11695	Environmental adaptation; Nervous system; Signaling molecules and interaction; Sensory system	94421-68-8	HMDB0004080	Nodiff
M351T391.pos	1.36217e+07	3.87098e+06	0.284177	-1.81514	0.0481739	0.483604	2.81908e+07	1.64383e+07	2.2266e+07	5.99387e+06	6.8357e+06	2.00561e+06	1.82528e+06	1.80006e+06	2.65182e+06	2.08555e+06	6.51943e+06	8.34372e+06	1.72151	Prostaglandin G2	351.214	390.8	368.22	0.0100597	C20H32O6	[M+H-H2O]+	Fatty Acyls	Eicosanoids	C05956	Lipid metabolism; Immune system; Nervous system	51982-36-6	HMDB0003235	Down
M351T480.pos	1.47005e+07	4.36542e+06	0.296957	-1.75167	0.51031	0.846885	4.74544e+07	2.14341e+07	8.5801e+06	6.61752e+06	3.80126e+06	315698	3.55013e+06	1.37069e+06	3.72235e+06	8.59374e+06	3.76632e+06	5.18932e+06	0.750809	9S-hydroxy-11,15-dioxo-5Z,13E-prostadienoic acid	351.215	480.1	350.209	5.62619	C20H30O5	[M+H]+	Fatty Acyls	Eicosanoids	C04758			HMDB0062297	Nodiff
M352T499.pos	1.29476e+07	1.14949e+07	0.887804	-0.171687	0.670971	0.90662	2.69874e+07	1.24321e+07	6.28137e+06	2.1356e+07	5.84537e+06	4.78327e+06	5.09296e+06	2.06637e+06	1.26922e+07	9.85553e+06	9.17396e+06	3.00885e+07	0.449123	Prostaglandin I2	352.25	499.4	352.225	4.60641	C20H32O5	[M]+	Fatty Acyls	Eicosanoids	C01312	Circulatory system; Signal transduction; Lipid metabolism; Signaling molecules and interaction; Immune system	35121-78-9	HMDB0001335	Nodiff
M353T403_2.pos	4.03331e+06	3.56669e+06	0.88431	-0.177376	0.462499	0.824076	3.94169e+06	3.00327e+06	2.5759e+06	4.91757e+06	4.71098e+06	5.05044e+06	4.03317e+06	3.41227e+06	3.12576e+06	4.03981e+06	2.80632e+06	3.98285e+06	0.568589	(13E)-11a-Hydroxy-9,15-dioxoprost-13-enoic acid	353.243	402.5	352.225	28.9433	C20H32O5	[M+H]+	Fatty Acyls	Eicosanoids	C04654		22973-19-9	HMDB0001320	Nodiff
M357T434.pos	878764	793874	0.903399	-0.146565	0.745656	0.932769	1.53157e+06	1.25105e+06	630932	888926	593390	376717	405722	1.24878e+06	813165	1.19585e+06	738422	361301	0.36562	(4Z,7Z,10Z,13Z,16Z,19Z)-Docosahexaenoic acid ethyl ester	357.279	433.7	356.272	0.492613	C24H36O2	[M+H]+			C16185		81926-94-5		Nodiff
M361T576.pos	1.1014e+07	3.53143e+06	0.32063	-1.64102	0.49509	0.84225	255079	363257	2.46467e+07	747714	2.14871e+07	1.85843e+07	1.05656e+06	1.64748e+07	538749	896667	1.63735e+06	584416	0.531573	Aldosterone	361.221	575.8	360.194	2.27162	C21H28O5	[M+H]+	Steroids and steroid derivatives	Hydroxysteroids	C01780	Lipid metabolism; Excretory system; Endocrine system	52-39-1	HMDB0000037	Nodiff
M363T367.pos	551974	1.17617e+06	2.13084	1.09142	0.146618	0.617498	622008	891129	182537	1.17879e+06	221709	215665	1.93527e+06	200055	1.67717e+06	527430	1.68521e+06	1.03187e+06	1.24362	Cortisol	363.216	367.3	362.209	1.58583	C21H30O5	[M+H]+	Steroids and steroid derivatives	Hydroxysteroids	C00735	Endocrine and metabolic disease; Cancer: overview; Excretory system; Digestive system; Endocrine system; Lipid metabolism; Signaling molecules and interaction; Cancer: specific types	50-23-7	HMDB0000063	Nodiff
M363T47_1.pos	7.55075e+07	1.62543e+07	0.215267	-2.2158	0.821474	0.953366	3.18782e+08	3.0239e+07	7.47608e+07	3.38153e+06	2.57009e+07	180521	2.34948e+07	9.64055e+06	1.01043e+06	2.00465e+07	2.3164e+07	2.01693e+07	0.402977	GMP	362.924	46.8	363.058	6.85633	C10H14N5O8P	[M]+	Purine nucleotides	Purine ribonucleotides	C00144	Sensory system; Signal transduction; Nucleotide metabolism	85-32-5	HMDB0001397	Nodiff
M365T618.pos	2.58785e+06	3.89555e+06	1.50532	0.590071	0.102661	0.563832	2.00804e+06	3.61776e+06	1.19101e+06	4.12161e+06	3.0555e+06	1.53319e+06	5.62867e+06	2.17698e+06	3.72398e+06	3.25336e+06	3.17741e+06	5.41288e+06	1.39773	Dihydrocortisol	365.241	618.1	364.225	24.1594	C21H32O5	[M+H]+	Steroids and steroid derivatives	Hydroxysteroids	C05471	Lipid metabolism	1482-50-4	HMDB0003259	Nodiff
M369T441.pos	3.72781e+06	5.70207e+06	1.52961	0.613159	0.236028	0.700445	8.96164e+06	3.62355e+06	3.67442e+06	3.50386e+06	2.45684e+06	146533	7.01201e+06	8.73338e+06	5.63114e+06	1.88705e+06	4.82842e+06	6.12045e+06	0.95416	Carboprost	369.263	441.2	368.256	0.747434	C21H36O5	[M+H]+			C06872		35700-23-3		Nodiff
M369T509.pos	2.62486e+07	1.75854e+07	0.669958	-0.577858	0.402983	0.797781	5.22594e+07	4.46395e+07	1.79276e+07	1.93461e+07	1.40362e+07	9.2824e+06	1.44958e+07	8.22023e+06	1.44266e+07	1.83625e+07	3.02146e+07	1.97927e+07	0.858373	Misoprostol	369.263	509.2	368.256	1.21935	C21H36O5	[M+H]+			C07227		59122-46-2		Nodiff
M369T637_2.pos	7.29791e+07	7.81429e+07	1.07076	0.0986316	0.741731	0.931922	8.16867e+07	5.18434e+07	7.23944e+07	7.50562e+07	5.70037e+07	9.98903e+07	3.03544e+07	1.25704e+08	1.08627e+08	3.55851e+07	3.54059e+07	1.33181e+08	0.25627	Cholesterol	369.351	636.9	386.355	3.79044	C27H46O	[M+H-H2O]+	Steroids and steroid derivatives	Cholestane steroids	C00187	Endocrine and metabolic disease; Cancer: overview; Digestive system; Endocrine system; Lipid metabolism; Cancer: specific types	57-88-5	HMDB0000067	Nodiff
M371T474.neg	9.03509e+06	1.49007e+07	1.6492	0.721769	0.110833	0.832901	3.06075e+07	4.35776e+06	4.59348e+06	2.6768e+06	6.25551e+06	5.71951e+06	8.92645e+06	1.03285e+07	1.59229e+07	8.47105e+06	1.01472e+07	3.5608e+07	1.47982	Deoxycorticosterone acetate	371.066	473.7	372.23	0.422927	C23H32O4	[M-H]-			C14554		56-47-3		Nodiff
M376T473.pos	1.36165e+07	1.53763e+07	1.12924	0.175351	0.530506	0.854968	9.14393e+06	7.85745e+06	1.10426e+07	2.19097e+07	1.8792e+07	1.29534e+07	1.44292e+07	8.65843e+06	1.27623e+07	2.49824e+07	1.60066e+07	1.54189e+07	0.588055	Lithocholic acid	376.312	473.2	376.298	1.65999	C24H40O3	[M]+	Lipids and lipid-like molecules	Steroids and steroid derivatives	C03990	Digestive system	434-13-9	HMDB0000761	Nodiff
M376T622_2.pos	4.60892e+07	3.90394e+07	0.84704	-0.239498	0.327224	0.756326	3.98796e+07	4.69239e+07	4.94032e+07	4.70783e+07	4.69097e+07	4.63404e+07	9.12253e+06	3.688e+07	5.06064e+07	5.18439e+07	4.35841e+07	4.21992e+07	0.876846	Docosatetraenoyl Ethanolamide	376.319	621.6	375.314	0.00397382	C24H41NO2	[M+H]+			C13829		150314-35-5		Nodiff
M377T254.pos	3.88225e+06	8.35657e+06	2.15251	1.10602	0.0645328	0.499838	277422	1.37755e+07	417245	5.01596e+06	438548	3.36878e+06	1.51616e+07	2.90443e+06	1.18279e+07	5.01158e+06	9.06996e+06	6.16398e+06	1.6434	Riboflavin	377.145	253.6	376.138	0.00025679	C17H20N4O6	[M+H]+	Pteridines and derivatives	Alloxazines and isoalloxazines	C00255	Metabolism of cofactors and vitamins; Digestive system; Membrane transport	83-88-5	HMDB0000244	Nodiff
M379T501.pos	657653	2.62358e+06	3.98931	1.99614	0.0439082	0.478351	2.46708e+06	365608	365559	275635	341242	130796	1.80161e+06	539501	4.07295e+06	492242	1.10606e+06	7.72911e+06	1.5502	Sphingosine 1-phosphate	379.257	500.8	379.249	21.6217	C18H38NO5P	[M]+	Organic oxides	Alcohols and polyols	C06124	Signal transduction; Lipid metabolism; Signaling molecules and interaction; Infectious disease: bacterial; Immune system	26993-30-6	HMDB0000277	Up
M382T621.pos	2.44576e+07	3.05839e+07	1.25049	0.322491	0.0235673	0.427675	2.61993e+07	1.81752e+07	2.56353e+07	2.54115e+07	2.82606e+07	2.30636e+07	3.4175e+07	2.77432e+07	3.21528e+07	2.4845e+07	2.90377e+07	3.55497e+07	1.7897	7-Dehydrodesmosterol	382.331	621	382.324	19.355	C27H42O	[M]+	Steroids and steroid derivatives	Cholestane steroids	C05107	Lipid metabolism	1715-86-2	HMDB0003896	Up
M384T381.pos	3.75762e+06	3.2266e+06	0.858681	-0.219806	0.626639	0.888575	7.28591e+06	2.35738e+06	4.14095e+06	2.71768e+06	1.74597e+06	4.29785e+06	4.15674e+06	2.26321e+06	5.10549e+06	1.05295e+06	2.82434e+06	3.95687e+06	0.415317	Myriocin	384.274	380.9	401.278	0.0139807	C21H39NO6	[M+H-H2O]+			C19914		35891-70-4		Nodiff
M384T556.pos	3.31141e+07	2.47418e+07	0.747168	-0.420495	0.255068	0.712977	5.30248e+07	3.16978e+07	1.88964e+07	3.58588e+07	3.76084e+07	2.15984e+07	4.44599e+06	8.11511e+06	3.09744e+07	2.40998e+07	3.88782e+07	4.19375e+07	1.0019	7-Dehydrocholesterol	384.348	555.6	384.339	22.1154	C27H44O	[M]+	Steroids and steroid derivatives	Cholestane steroids	C01164	Lipid metabolism	434-16-2	HMDB0000032	Nodiff
M384T622.pos	1.21344e+08	4.25129e+07	0.35035	-1.51313	0.0427063	0.477529	4.8095e+07	9.77991e+07	9.40763e+07	6.09738e+07	5.99363e+07	3.67185e+08	3.50591e+07	3.28622e+07	2.86845e+07	6.60581e+07	3.924e+07	5.31736e+07	1.67745	Vitamin D3	384.345	621.6	384.339	14.8304	C27H44O	[M]+	Steroids and steroid derivatives	Vitamin D and derivatives	C05443	Lipid metabolism; Immune disease; Digestive system	67-97-0	HMDB0000876	Down
M385T556.pos	1.72109e+07	2.51135e+07	1.45917	0.545144	0.0934748	0.547406	2.09063e+07	2.11374e+07	5.48994e+06	2.12101e+07	1.06647e+07	2.3857e+07	2.77523e+07	2.50658e+07	2.51419e+07	2.35694e+07	2.35826e+07	2.55693e+07	1.53001	Cholestenone	385.349	555.8	384.339	3.60262	C27H44O	[M+H]+	Steroids and steroid derivatives	Cholestane steroids	C00599		601-57-0	HMDB0000921	Nodiff
M391T543.pos	4.67286e+07	5.6221e+07	1.20314	0.266805	0.318491	0.750495	1.00928e+07	5.34335e+07	5.01842e+07	6.35549e+07	5.31602e+07	4.99459e+07	4.62518e+07	6.29227e+07	5.00408e+07	6.46615e+07	5.38182e+07	5.96313e+07	0.980419	Adenosine 5'-phosphate disodium	391.283	543.3	391.027	1.84703	C10H12N5O7P. 2Na	[M]+					4578-31-8		Nodiff
M397T467.pos	4.05743e+06	7.61665e+06	1.87721	0.908589	0.105363	0.566252	4.42107e+06	2.45831e+06	1.73384e+06	2.61429e+06	6.101e+06	7.0161e+06	5.93932e+06	8.40127e+06	5.43648e+06	1.60221e+07	7.46202e+06	2.43875e+06	1.37784	Ergocalciferol	397.2	466.6	396.339	0.823781	C28H44O	[M+H]+	Steroids and steroid derivatives	Vitamin D and derivatives	C05441	Lipid metabolism	50-14-6	HMDB0000900	Nodiff
M397T470.neg	5.49884e+06	6.59117e+06	1.19865	0.261408	0.168792	0.850745	5.67619e+06	3.75854e+06	6.26969e+06	7.4366e+06	6.5791e+06	3.27293e+06	5.55355e+06	7.10405e+06	6.22089e+06	6.86737e+06	6.85029e+06	6.9509e+06	1.38794	Daidzin	397.227	470.3	416.111	0.00682116	C21H20O9	[M-H2O-H]-	Isoflavonoids	Isoflavonoid O-glycosides	C10216		552-66-9	HMDB0033991	Nodiff
M397T599_3.pos	3.77955e+07	3.81395e+07	1.0091	0.0130716	0.498414	0.843185	1.11675e+08	2.4958e+07	4.06886e+07	1.80346e+07	2.35876e+07	7.82978e+06	3.65633e+07	3.93526e+07	6.8715e+07	2.69946e+07	3.56551e+07	2.15566e+07	0.518428	beta-Sitosterol	397.379	598.8	414.386	0.166088	C29H50O	[M+H-H2O]+	Steroids and steroid derivatives	Stigmastanes and derivatives	C01753	Lipid metabolism	83-46-5	HMDB0000852	Nodiff
M398T460_2.pos	2.69496e+08	2.79521e+08	1.0372	0.052693	0.912161	0.978234	3.68755e+08	1.6615e+08	1.68058e+08	2.8806e+08	3.02236e+08	3.23715e+08	2.16966e+08	1.69488e+08	3.69426e+08	4.31728e+08	1.90866e+08	2.98651e+08	0.1206	S-Adenosylmethionine	398.24	459.9	398.137	3.31745	C15H22N6O5S	[M]+			C00019	Amino acid metabolism; Folding, sorting and degradation	17176-17-9		Nodiff
M399T538.pos	6.34164e+06	7.99981e+06	1.26147	0.335111	0.782924	0.943914	1.04395e+07	6.45515e+06	1.15034e+07	4.74622e+06	2.19473e+06	2.71083e+06	4.6167e+06	741345	7.85283e+06	2.4427e+06	4.56406e+06	2.77812e+07	0.340738	Tris(butoxyethyl)phosphate	399.249	537.5	398.243	2.94553	C18H39O7P	[M+H]+	Extractables/Leachables; Textile Chemicals/Auxiliary/Dyes; Industrial Chemicals		C14446		78-51-3		Nodiff
M400T480_2.pos	5.66453e+08	7.15105e+08	1.26243	0.336199	0.990489	0.996549	1.46534e+09	2.80602e+08	6.36563e+08	2.95078e+08	3.15974e+08	4.05155e+08	3.6273e+08	2.08243e+08	3.66433e+08	3.21825e+08	4.43034e+08	2.58836e+09	0.131572	Palmitoyl-L-carnitine	400.344	479.8	399.335	0.747649	C23H45NO4	[M+H]+			C02990	Lipid metabolism	2364-67-2		Nodiff
M408T643_1.pos	2.31607e+08	1.73463e+08	0.748955	-0.417049	0.819384	0.952867	1.77981e+07	1.38736e+08	2.2428e+08	2.46375e+08	4.68958e+08	2.93495e+08	1.66239e+08	1.4259e+08	1.96268e+08	2.94061e+07	1.96041e+08	3.10234e+08	0.0232265	Allocholic acid	408.366	643.3	408.288	1.6726	C24H40O5	[M]+	Steroids and steroid derivatives	Bile acids, alcohols and derivatives	C00695	Lipid metabolism; Digestive system	2464-18-8 / 81-25-4	HMDB0000505	Nodiff
M415T477_2.pos	2.67808e+08	1.40722e+08	0.525457	-0.928354	0.399522	0.794493	5.7957e+08	2.62228e+08	3.94801e+08	1.88858e+08	1.62239e+08	1.91522e+07	7.88103e+07	3.56604e+07	1.30704e+08	1.73795e+08	6.74124e+07	3.57949e+08	0.892478	Sodium deoxycholate	415.212	477.4	414.275	5.1095	C24H39O4. Na	[M+H]+			C11171		302-95-4		Nodiff
M426T475.pos	5.67983e+06	5.12384e+06	0.902112	-0.148622	0.933391	0.9829	7.99599e+06	9.87815e+06	5.80701e+06	4.58382e+06	4.42472e+06	1.38928e+06	6.74235e+06	5.83946e+06	4.35592e+06	6.3307e+06	3.54264e+06	3.93198e+06	0.0716587	Lanosterin	426.321	475.1	426.386	1.79647	C30H50O	[M]+	Prenol lipids	Triterpenoids	C01724	Lipid metabolism	79-63-0	HMDB0001251	Nodiff
M429T658_1.pos	2.42931e+08	2.35808e+08	0.970681	-0.0429303	0.848871	0.961204	4.25653e+08	3.18301e+08	1.23362e+08	1.20504e+08	2.50698e+08	2.19066e+08	1.00074e+08	1.59589e+08	2.33274e+08	3.70439e+08	1.32576e+08	4.18898e+08	0.262294	24,25-Dihydrolanosterol	429.403	658.5	428.402	13.6841	C30H52O	[M+H]+	Prenol lipids	Triterpenoids	C05109	Lipid metabolism	79-62-9	HMDB0006839	Nodiff
M429T683.pos	1.68316e+07	1.17809e+07	0.699927	-0.514724	0.392701	0.790544	3.88703e+07	6.20811e+06	1.43627e+07	1.0229e+07	1.6234e+07	1.50855e+07	6.3473e+06	1.33137e+07	2.02681e+07	9.98482e+06	7.68263e+06	1.30887e+07	0.751318	(24R,24(1)R)-Fucosterol epoxide	429.371	682.6	428.365	4.36918	C29H48O2	[M+H]+			C03910				Nodiff
M432T467_2.pos	3.74153e+08	1.63225e+08	0.436252	-1.19677	0.236215	0.700445	1.98969e+07	3.7776e+07	4.71914e+08	3.92125e+07	6.65557e+08	1.01056e+09	1.2064e+07	6.59768e+08	7.27573e+07	2.27972e+08	3.30088e+06	3.48698e+06	0.949777	Isovitexin	432.236	466.5	432.106	5.80866	C21H20O10	[M]+			C01714		38953-85-4 / 29702-25-8		Nodiff
M433T465.pos	1.76261e+06	2.44905e+06	1.38945	0.474509	0.495745	0.842416	3.73465e+06	1.16949e+06	2.1296e+06	1.92858e+06	1.15119e+06	462133	819619	3.52216e+06	4.27727e+06	3.60704e+06	778755	1.68943e+06	0.499152	Genistin	433.341	464.8	432.106	8.38078	C21H20O10	[M+H]+	Isoflavonoids	Isoflavonoid O-glycosides	C09126		529-59-9	HMDB0033988	Nodiff
M434T459.neg	2.54126e+06	3.57281e+06	1.40592	0.491513	0.227602	0.862413	8.21155e+06	1.91766e+06	763007	2.468e+06	1.81476e+06	72616.2	2.36372e+06	4.8172e+06	7.28156e+06	1.92687e+06	1.9814e+06	3.06613e+06	1.24336	Paxilline	434.236	458.5	435.241	5.70197	C27H33NO4	[M-H]-	Naphthopyrans		C13782		57186-25-1	HMDB0030323	Nodiff
M465T572_2.neg	2.33238e+08	3.1405e+08	1.34648	0.429195	0.137843	0.841746	7.81598e+08	1.26724e+08	1.80612e+08	7.14861e+07	1.29985e+08	1.09021e+08	2.67281e+08	2.58878e+08	2.68377e+08	2.96955e+08	2.31666e+08	5.61146e+08	1.42161	Glycocholic acid	465.305	571.7	465.309	1.39863	C26H43NO6	[M]-			C01921	Lipid metabolism; Digestive system	1192657-83-2		Nodiff
M480T370.pos	1.56156e+06	1.20441e+06	0.771286	-0.374662	0.222916	0.693821	1.49413e+06	969065	1.55789e+06	1.62276e+06	1.3448e+06	2.38072e+06	429435	1.54276e+06	559693	724968	2.25688e+06	1.71273e+06	1.07246	26-Hydroxyecdysone	480.275	369.9	480.309	5.13708	C27H44O7	[M]+			C16499		52717-49-4		Nodiff
M495T589.pos	6.19976e+07	1.51871e+08	2.44963	1.29256	0.0692191	0.505623	5.68671e+07	5.8888e+07	4.0004e+06	4.33349e+07	9.67787e+07	1.12117e+08	1.6469e+08	2.14107e+08	2.15607e+08	1.24455e+08	1.40693e+08	5.16744e+07	1.66615	Mibefradil	495.305	589.2	495.29	11.9603	C29H38FN3O3	[M-H2O+NH4]+			C07222		116644-53-2		Nodiff
M496T524_2.pos	2.08495e+09	1.85671e+09	0.890527	-0.167269	0.572631	0.870203	3.74354e+09	2.41694e+09	1.23418e+09	2.1312e+09	2.05676e+09	9.27093e+08	2.81041e+08	1.42484e+09	1.58967e+09	2.97408e+09	1.89571e+09	2.97492e+09	0.586481	1-palmitoylglycerophosphocholine	496.334	523.7	496.34	11.8872	C24H51NO7P	[M+H]+	Glycerophospholipids	Glycerophosphocholines	C04102		17364-16-8	HMDB0062541	Nodiff
M498T370.pos	1.65983e+06	1.95079e+06	1.1753	0.233027	0.701222	0.920111	2.83771e+06	294783	368572	378396	4.58698e+06	1.49253e+06	441846	431876	1.14643e+06	889126	3.76698e+06	5.0285e+06	0.36182	Taurocholic acid	498.289	370.2	515.292	10.1026	C26H45NO7S	[M+H-H2O]+	Steroids and steroid derivatives	Bile acids, alcohols and derivatives	C05122	Lipid metabolism; Metabolism of other amino acids; Digestive system	81-24-3	HMDB0000036	Nodiff
M507T579_2.pos	2.51769e+07	5.85896e+07	2.32712	1.21855	0.0256285	0.435007	2.13602e+07	2.64923e+07	2.73651e+07	1.94716e+07	3.85643e+07	1.78077e+07	3.1913e+07	7.71002e+07	9.8424e+07	2.9561e+07	2.9023e+07	8.55165e+07	1.84773	Deltaline	507.268	579.3	507.283	29.5702	C27H41NO8	[M]+			C08679		6836-11-9 / 3836-11-9		Up
M507T592_2.neg	4.10234e+07	4.35595e+07	1.06182	0.0865376	0.653598	0.941417	2.91382e+07	6.00247e+07	3.69024e+07	3.69032e+07	3.82692e+07	4.49028e+07	3.62003e+07	4.67205e+07	4.36405e+07	6.29309e+07	3.32739e+07	3.85906e+07	0.44108	ATP	507.119	592.2	506.996	4.6796	C10H16N5O13P3	[M]-	Purine nucleotides	Purine ribonucleotides	C00002	Endocrine and metabolic disease; Transport and catabolism; Signal transduction; Cell growth and death; Nervous system; Sensory system; Environmental adaptation; Endocrine system; Neurodegenerative disease; Cardiovascular disease; Signaling molecules and interaction; Nucleotide metabolism; Energy metabolism; Immune system	56-65-5 / 987-65-5	HMDB0000538	Nodiff
M545T649_2.pos	6.51975e+06	4.0242e+06	0.617232	-0.696116	0.624817	0.888575	2.0691e+07	4.14699e+06	5.29958e+06	4.19049e+06	3.82974e+06	960697	4.61454e+06	1.66502e+06	4.1606e+06	2.10284e+06	2.87375e+06	8.72845e+06	0.553116	Protoporphyrin IX	545.408	649.1	562.258	12.3641	C34H34N4O4	[M+H-H2O]+	Tetrapyrroles and derivatives	Porphyrins	C02191	Metabolism of cofactors and vitamins	553-12-8	HMDB0000241	Nodiff
M570T524_1.pos	5.28036e+07	1.93052e+07	0.365604	-1.45165	0.723201	0.926932	2.53968e+08	1.22896e+07	1.48017e+07	2.28273e+07	3.70742e+06	9.22743e+06	1.54675e+07	1.27827e+07	1.17672e+07	1.05286e+07	5.72725e+06	5.95578e+07	0.472164	Avermectin B1b aglycone	570.352	524.3	570.319	5.96432	C33H46O8	[M]+			C11963				Nodiff
M659T626.pos	4.20828e+07	2.74377e+07	0.651993	-0.617071	0.831175	0.955465	1.52103e+08	2.15052e+07	5.27142e+07	1.19185e+07	8.77619e+06	5.47947e+06	3.66514e+07	3.08406e+06	2.2338e+07	2.0895e+07	1.10023e+07	7.06554e+07	0.361338	Fucoxanthin	659.442	626.4	658.423	16.8324	C42H58O6	[M+H]+	Prenol lipids	Tetraterpenoids	C08596		3351-86-8	HMDB0002741	Nodiff

## Sheet: +Ca+B VS -Ca-B
ID	meanControl	meanTreat	foldChange	log2FoldChange	pvalue	FDR	+Ca+B 1	+Ca+B 2	+Ca+B 3	+Ca+B 4	+Ca+B 5	+Ca+B 6	-Ca-B 1	-Ca-B 2	-Ca-B 3	-Ca-B 4	-Ca-B 5	-Ca-B 6	vip	Name	mz	rt	exact_mass	ppm	formula	precursor_type	class	sub_class	KEGG	KEGG_Pathway	CAS	hmdb	Regulation
M102T42_2.pos	1.84629e+07	5.86187e+06	0.317495	-1.6552	0.0102746	0.476131	1.70857e+07	2.56092e+07	8.15954e+06	2.91814e+07	5.82862e+06	2.4913e+07	4.51975e+06	1.20342e+07	2.91801e+06	3.50104e+06	5.75388e+06	6.44434e+06	2.03888	2-Ketobutyric acid	102.034	42	102.032	2.58889	C4H6O3	[M]+	Keto acids and derivatives	Short-chain keto acids and derivatives	C00109	Carbohydrate metabolism; Amino acid metabolism	600-18-0	HMDB0000005	Down
M102T46.neg	7.33373e+06	7.1009e+06	0.968253	-0.0465446	0.674309	0.945541	7.34832e+06	1.5516e+06	2.17753e+07	9.81583e+06	1.96344e+06	1.5479e+06	1.16194e+07	8.35376e+06	6.1088e+06	5.43923e+06	1.03975e+06	1.00445e+07	0.348288	Dimethylglycine	102.056	45.8	103.063	2.70439	C4H9NO2	[M-H]-	Carboxylic acids and derivatives	Amino acids, peptides, and analogues	C01026	Amino acid metabolism	1118-68-9	HMDB0000092	Nodiff
M102T51.pos	1.04688e+08	9.42806e+07	0.900583	-0.151069	0.693303	0.934076	1.6435e+08	8.32712e+07	1.1768e+08	1.42835e+08	6.74947e+07	5.24986e+07	6.64325e+07	6.8769e+07	7.64061e+07	1.7334e+08	6.25645e+07	1.18171e+08	0.36291	1-Aminocyclopropanecarboxylic acid	102.055	50.6	101.048	0.979863	C4H7NO2	[M+H]+	Carboxylic acids and derivatives	Amino acids, peptides, and analogues	C01234	Amino acid metabolism	22059-21-8	HMDB0036458	Nodiff
M102T689.pos	5.75489e+07	5.01374e+07	0.871214	-0.198902	0.259115	0.755926	3.62782e+07	7.30509e+07	7.4619e+07	5.3989e+07	5.45264e+07	5.28299e+07	4.24873e+07	4.56297e+07	1.55392e+08	3.62886e+07	1.16224e+07	9.40389e+06	1.08975	Triethylamine	102.128	688.7	101.12	0.00529945	C6H15N	[M+H]+	Amines	Tertiary amines	C14691		121-44-8	HMDB0032539	Nodiff
M103T49.neg	1.26768e+07	1.06787e+07	0.842383	-0.247452	0.605105	0.930318	2.48745e+07	1.00517e+07	1.07412e+07	9.00062e+06	1.45643e+07	6.82852e+06	6.78049e+06	1.16381e+07	8.15322e+06	1.57789e+07	9.59355e+06	1.21282e+07	0.617154	(R)-3-Hydroxybutyric acid	103.04	49.3	104.047	2.67856	C4H8O3	[M-H]-	Hydroxy acids and derivatives	Beta hydroxy acids and derivatives	C01089	Carbohydrate metabolism; Signal transduction	625-72-9 / 300-85-6	HMDB0000011	Nodiff
M104T50.neg	5.95212e+07	4.92903e+07	0.828113	-0.272101	0.865248	0.985563	1.89446e+08	3.09252e+07	4.38214e+07	4.12263e+07	2.81324e+07	2.35755e+07	2.11766e+07	3.07653e+07	3.15685e+07	1.2829e+08	3.94506e+07	4.44907e+07	0.323998	L-Serine	104.036	49.5	105.043	2.65294	C3H7NO3	[M-H]-	Carboxylic acids and derivatives	Amino acids, peptides, and analogues	C00065	Cancer: overview; Membrane transport; Signal transduction; Digestive system; Lipid metabolism; Carbohydrate metabolism; Translation; Amino acid metabolism; Energy metabolism	56-45-1	HMDB0000187	Nodiff
M104T575.pos	2.70075e+07	2.46803e+07	0.913833	-0.129997	0.447899	0.860815	9.19028e+07	3.03065e+06	1.20448e+07	2.1231e+07	1.76299e+07	1.62056e+07	2.088e+07	3.04993e+07	2.12389e+07	3.44607e+07	1.77244e+07	2.32785e+07	0.718129	Choline	104.107	574.5	104.108	0.960551	C5H14NO	[M+H]+	Organonitrogen compounds	Quaternary ammonium salts	C00114	Cancer: overview; Membrane transport; Nervous system; Digestive system; Lipid metabolism; Amino acid metabolism	62-49-7	HMDB0000097	Nodiff
M104T622.pos	2.29944e+07	1.62708e+07	0.707597	-0.498999	0.355928	0.813784	1.71824e+07	4.19255e+07	7.20314e+06	1.80067e+07	2.67279e+07	2.69209e+07	1.79567e+07	2.32706e+07	2.51345e+07	7.3185e+06	1.06676e+07	1.32768e+07	0.855591	gamma-Aminobutyric acid	104.107	621.9	103.063	3.6859	C4H9NO2	[M+H]+	Carboxylic acids and derivatives	Amino acids, peptides, and analogues	C00334	Metabolism of cofactors and vitamins; Metabolism of other amino acids; Signal transduction; Nervous system; Sensory system; Endocrine system; Carbohydrate metabolism; Signaling molecules and interaction; Amino acid metabolism; Substance dependence	1956-12-02	HMDB0000112	Nodiff
M105T47.neg	2.8113e+07	2.35355e+07	0.837175	-0.256398	0.865307	0.985563	9.55853e+07	1.25031e+07	1.89473e+07	1.95094e+07	1.23655e+07	9.76728e+06	7.04695e+06	1.2296e+07	1.36508e+07	6.74663e+07	1.95038e+07	2.12492e+07	0.312126	Glyceric acid	105.02	46.5	106.027	2.62808	C3H6O4	[M-H]-	Organooxygen compounds	Carbohydrates and carbohydrate conjugates	C00258	Carbohydrate metabolism; Amino acid metabolism; Lipid metabolism	473-81-4	HMDB0000139	Nodiff
M107T99.pos	8.1527e+06	8.16053e+06	1.00096	0.00138438	0.543088	0.891767	1.81934e+07	6.09613e+06	7.79887e+06	6.95952e+06	8.74472e+06	1.1236e+06	6.37893e+06	1.05635e+07	7.81041e+06	9.78953e+06	6.51816e+06	7.90266e+06	0.589549	Benzaldehyde	107.049	99	106.042	0.00100233	C7H6O	[M+H]+	Benzene and substituted derivatives	Benzoyl derivatives	C00261		100-52-7	HMDB0006115	Nodiff
M109T33.pos	3.98838e+06	4.07668e+06	1.02214	0.0315926	0.796664	0.957468	6.29483e+06	2.82902e+06	2.94079e+06	3.27277e+06	4.57262e+06	4.02026e+06	5.27663e+06	3.41393e+06	2.96966e+06	3.54286e+06	4.26566e+06	4.99135e+06	0.267411	m-Cresol	109.022	33.1	108.058	2.51839	C7H8O	[M+H]+	Phenols	Cresols	C01467		108-39-4	HMDB0002048	Nodiff
M110T331.pos	8.35961e+07	7.71584e+07	0.92299	-0.115613	0.466108	0.865832	1.00991e+08	8.96471e+07	8.31426e+07	6.83014e+07	6.92245e+07	9.02705e+07	1.38244e+08	8.03324e+07	8.61254e+07	8.19548e+07	5.99402e+07	1.63538e+07	0.73737	Catechol	110.019	330.8	110.037	12.4815	C6H6O2	[M]+			C00090		120-80-9 / 12385-08-9		Nodiff
M110T642.pos	5.35075e+08	5.04267e+08	0.942422	-0.0855549	0.980677	0.995757	1.0202e+09	3.33785e+08	4.81421e+08	5.81595e+08	2.54203e+08	5.39247e+08	4.49747e+08	4.35672e+08	7.54313e+08	4.19558e+08	6.56363e+08	3.09947e+08	0.0277341	Hydroquinone	110.021	641.8	110.037	1.89295	C6H6O2	[M]+	Phenols	Benzenediols	C00530	Amino acid metabolism	123-31-9	HMDB0002434	Nodiff
M111T41.neg	6.46401e+06	1.15894e+07	1.79291	0.842306	0.818962	0.979934	5.41427e+06	5.62854e+06	8.22064e+06	7.30923e+06	5.65161e+06	6.55979e+06	5.66637e+06	6.74398e+06	5.76498e+06	4.1335e+06	2.97053e+06	4.42572e+07	0.208622	2-Furoate	111.009	40.6	112.016	2.48628	C5H4O3	[M-H]-	Furans	Furoic acid and derivatives	C01546		88-14-2	HMDB0000617	Nodiff
M111T61.neg	3.17438e+08	1.85021e+08	0.582855	-0.778791	0.51615	0.90423	1.12089e+09	1.40675e+08	1.77471e+08	2.09836e+08	1.65892e+08	8.9873e+07	1.12841e+08	1.51937e+08	1.46147e+08	4.50264e+08	8.4414e+07	1.64521e+08	0.775138	Uracil	111.02	61.4	112.027	1.80148	C4H4N2O2	[M-H]-	Diazines	Pyrimidines and pyrimidine derivatives	C00106	Metabolism of cofactors and vitamins; Metabolism of other amino acids; Nucleotide metabolism	66-22-8	HMDB0000300	Nodiff
M112T509.pos	4.06168e+07	3.64459e+07	0.897309	-0.156322	0.652356	0.924051	4.20604e+07	2.11185e+07	3.0106e+07	5.17583e+07	3.80345e+07	6.06235e+07	4.14565e+07	4.43445e+07	4.26454e+07	4.40628e+07	1.80941e+07	2.80718e+07	0.451499	Pyrrole-2-carboxylic acid	111.521	508.8	111.032	14.6606	C5H5NO2	[M+H]+	Pyrroles	Pyrrole carboxylic acids and derivatives	C05942	Amino acid metabolism	634-97-9	HMDB0004230	Nodiff
M112T51.pos	5.07175e+08	5.39384e+08	1.06351	0.0888279	0.795506	0.957055	3.39282e+08	8.77602e+08	4.38451e+08	4.11171e+08	4.40538e+08	5.36006e+08	9.06614e+08	3.56005e+08	3.91611e+08	3.96868e+08	5.3148e+08	6.53725e+08	0.23893	Cytosine	112.051	51.2	111.043	0.214189	C4H5N3O	[M+H]+	Diazines	Pyrimidines and pyrimidine derivatives	C00380	Nucleotide metabolism	71-30-7	HMDB0000630	Nodiff
M113T54.pos	2.17912e+06	2.60707e+06	1.19639	0.258686	0.246321	0.747367	1.98472e+06	2.77687e+06	2.72148e+06	1.84908e+06	2.36189e+06	1.38065e+06	1.68989e+06	2.71511e+06	3.23343e+06	2.45209e+06	3.28028e+06	2.27163e+06	1.05019	Heptanoic acid	113	54.3	130.099	3.92321	C7H14O2	[M+H-H2O]+	Fatty Acyls	Fatty acids and conjugates	C17714		111-14-8	HMDB0000666	Nodiff
M114T185.pos	3.53448e+07	5.61998e+07	1.59004	0.669067	0.16282	0.673916	4.45277e+07	2.78637e+07	3.15916e+07	4.78354e+07	3.58548e+07	2.43957e+07	2.52446e+07	9.28165e+07	9.34958e+07	4.88892e+07	4.23736e+07	3.43791e+07	1.24286	2-Heptanone	113.962	184.6	114.105	16.511	C7H14O	[M]+	Organooxygen compounds	Carbonyl compounds	C08380		110-43-0	HMDB0003671	Nodiff
M114T50.pos	6.12641e+07	5.84233e+07	0.95363	-0.068499	0.776087	0.953123	4.62376e+07	5.38125e+07	4.11543e+07	1.2122e+08	5.18527e+07	5.33072e+07	3.73152e+07	8.71117e+07	4.12126e+07	2.68405e+07	9.21883e+07	6.58715e+07	0.229277	Creatinine	114.066	50.2	113.059	0	C4H7N3O	[M+H]+	Carboxylic acids and derivatives	Amino acids, peptides, and analogues	C00791	Amino acid metabolism	60-27-5	HMDB0000562	Nodiff
M114T606.pos	3.28131e+07	3.72473e+07	1.13514	0.182867	0.810602	0.961617	2.56239e+07	2.59366e+07	2.99481e+07	5.18157e+07	2.67203e+07	3.68338e+07	3.03305e+07	2.79135e+07	8.42662e+07	2.7834e+07	2.63294e+07	2.68102e+07	0.211651	Epsilon-caprolactam	114.091	605.6	113.084	0.00641237	C6H11NO	[M+H]+	Lactams	Caprolactams	C06593		105-60-2	HMDB0062769	Nodiff
M115T100.pos	6.34976e+06	6.65345e+06	1.04783	0.0674004	0.789237	0.955321	1.47213e+06	7.08213e+06	1.11942e+07	5.74582e+06	7.18913e+06	5.41517e+06	6.19692e+06	8.97066e+06	9.99391e+06	2.3643e+06	7.81506e+06	4.57986e+06	0.265135	Dihydrouracil	115.039	100.1	114.043	1.47177	C4H6N2O2	[M+H]+	Diazines	Pyrimidines and pyrimidine derivatives	C00429	Metabolism of cofactors and vitamins; Metabolism of other amino acids; Nucleotide metabolism	504-07-4	HMDB0000076	Nodiff
M115T44.neg	7.50385e+06	6.49877e+06	0.866058	-0.207465	0.991909	0.998452	2.36609e+07	2.0231e+06	5.41612e+06	6.42185e+06	1.96207e+06	5.53905e+06	8.09471e+06	7.06687e+06	9.62159e+06	6.95219e+06	696517	6.56072e+06	0.108909	Fumaric acid	115.004	44	116.011	1.53038	C4H4O4	[M-H]-	Carboxylic acids and derivatives	Dicarboxylic acids and derivatives	C00122	Cancer: overview; Metabolism of cofactors and vitamins; Endocrine system; Carbohydrate metabolism; Cancer: specific types; Amino acid metabolism; Energy metabolism	110-17-8	HMDB0000134	Nodiff
M115T686.neg	7.00332e+08	2.40561e+08	0.343495	-1.54164	0.20403	0.805395	2.59173e+09	2.23902e+08	9.08787e+08	1.58201e+08	1.56553e+08	1.62816e+08	1.34938e+07	4.37123e+08	1.48108e+08	5.80888e+08	2.96661e+07	2.34085e+08	1.28117	Caproic acid	114.933	686.3	116.084	3.09367	C6H12O2	[M-H]-	Fatty Acyls	Fatty acids and conjugates	C01585		142-62-1 / 151-33-7	HMDB0000535	Nodiff
M116T122.pos	1.94119e+07	1.31685e+07	0.678371	-0.559853	0.892116	0.980366	6.08045e+07	7.21177e+06	2.66598e+07	1.59751e+07	3.40985e+06	2.41069e+06	1.01673e+07	1.71062e+07	2.54522e+07	1.98625e+07	3.29278e+06	3.13007e+06	0.147914	L-Proline	116.072	121.8	115.063	2.97624	C5H9NO2	[M+H]+	Carboxylic acids and derivatives	Amino acids, peptides, and analogues	C00148	Cancer: overview; Membrane transport; Digestive system; Translation; Amino acid metabolism	147-85-3	HMDB0000162	Nodiff
M117T43_2.neg	3.17122e+06	6.07244e+06	1.91486	0.937239	0.178352	0.803923	2.69368e+06	6.73226e+06	2.47719e+06	2.45737e+06	2.40473e+06	2.26208e+06	2.41436e+06	7.67375e+06	1.05837e+07	2.56565e+06	2.46849e+06	1.07287e+07	1.23784	Succinic acid	117.02	42.7	118.027	2.35858	C4H6O4	[M-H]-	Carboxylic acids and derivatives	Dicarboxylic acids and derivatives	C00042	Cancer: overview; Metabolism of cofactors and vitamins; Nervous system; Signal transduction; Endocrine system; Carbohydrate metabolism; Amino acid metabolism; Energy metabolism	110-15-6	HMDB0000254	Nodiff
M117T459.neg	3.23874e+07	4.59269e+07	1.41805	0.503908	0.165745	0.796135	2.82941e+07	3.15899e+07	4.45322e+07	2.59682e+07	2.80219e+07	3.59181e+07	4.03436e+07	5.0252e+07	2.68906e+07	2.94169e+07	4.3325e+07	8.53337e+07	1.2943	Guanidoacetic acid	116.927	459.2	117.054	0.0913984	C3H7N3O2	[M]-	Carboxylic acids and derivatives	Amino acids, peptides, and analogues	C00581	Amino acid metabolism	352-97-6	HMDB0000128	Nodiff
M117T527.neg	5.77318e+07	5.51188e+07	0.954739	-0.0668213	0.682597	0.948051	3.29577e+07	5.50691e+07	5.97164e+07	4.67598e+07	1.33364e+08	1.85237e+07	6.41748e+07	4.47191e+07	5.61374e+07	7.05968e+07	4.78141e+07	4.72707e+07	0.420125	Methylmalonic acid	116.928	527.2	118.027	2.85327	C4H6O4	[M-H]-	Carboxylic acids and derivatives	Dicarboxylic acids and derivatives	C02170	Carbohydrate metabolism; Amino acid metabolism; Nucleotide metabolism	516-05-2	HMDB0000202	Nodiff
M117T686.neg	7.69748e+09	5.52137e+09	0.717296	-0.47936	0.490943	0.896525	2.18063e+10	5.56404e+09	6.19527e+09	5.15212e+09	3.71615e+09	3.75107e+09	3.30591e+09	3.99927e+09	3.41285e+09	1.21388e+10	3.02783e+09	7.24358e+09	0.838515	Betaine	116.927	686.1	117.079	0.319204	C5H11NO2	[M]-	Carboxylic acids and derivatives	Amino acids, peptides, and analogues	C00719	Amino acid metabolism; Membrane transport	107-43-7 / 590-46-5	HMDB0000043	Nodiff
M118T190.pos	2.15074e+07	2.13468e+07	0.99253	-0.0108168	0.877514	0.977516	2.39886e+07	1.88157e+07	2.23139e+07	2.12967e+07	2.1943e+07	2.06866e+07	2.34397e+07	2.14799e+07	2.02676e+07	2.31665e+07	2.021e+07	1.95168e+07	0.156737	Indole	118.065	190.3	117.058	1.89726	C8H7N	[M+H]+	Indoles and derivatives	Indoles	C00463	Amino acid metabolism; Digestive system	120-72-9	HMDB0000738	Nodiff
M118T219.pos	1.91523e+07	2.02461e+07	1.05711	0.0801273	0.878946	0.977913	9.45622e+06	1.73257e+07	2.86731e+07	2.50338e+07	6.67636e+06	2.77487e+07	2.79368e+07	1.9458e+07	2.39834e+07	3.34147e+07	8.37262e+06	8.31125e+06	0.080688	5-Aminopentanoic acid	118.085	219	117.079	7.6928	C5H11NO2	[M+H]+	Carboxylic acids and derivatives	Amino acids, peptides, and analogues	C00431	Amino acid metabolism	660-88-8	HMDB0003355	Nodiff
M118T58.pos	4.53214e+09	5.77355e+09	1.27391	0.349268	0.647028	0.923272	8.55694e+08	8.79525e+09	2.37176e+09	5.33937e+09	2.54711e+09	7.28363e+09	4.22065e+09	1.06145e+09	3.11069e+09	1.37567e+10	5.28393e+09	7.20789e+09	0.397754	L-Valine	118.086	57.7	117.079	0.846838	C5H11NO2	[M+H]+	Carboxylic acids and derivatives	Amino acids, peptides, and analogues	C00183	Cancer: overview; Metabolism of cofactors and vitamins; Membrane transport; Digestive system; Translation; Amino acid metabolism	72-18-4	HMDB0000883	Nodiff
M118T686.neg	8.99555e+08	8.23501e+08	0.915453	-0.127443	0.324614	0.846211	6.46447e+08	9.77428e+08	9.04328e+08	9.03272e+08	9.34655e+08	1.0312e+09	9.00383e+08	7.99655e+08	8.9388e+08	6.93494e+08	8.15009e+08	8.38581e+08	0.791663	L-Homoserine	117.928	686.4	119.058	7.51624	C4H9NO3	[M-H]-	Carboxylic acids and derivatives	Amino acids, peptides, and analogues	C00263	Energy metabolism; Amino acid metabolism	672-15-1 / 1927-25-9	HMDB0000719	Nodiff
M119T190.pos	1.34481e+07	9.07766e+06	0.675016	-0.567007	0.0514137	0.571523	1.13033e+07	9.257e+06	1.18716e+07	1.66069e+07	1.75337e+07	1.41159e+07	7.58993e+06	6.63659e+06	5.90082e+06	6.59966e+06	1.86088e+07	9.13012e+06	1.62289	5-Hydroxypentanoic acid	119.073	190.4	118.063	24.5563	C5H10O3	[M+H]+	Fatty Acyls	Fatty acids and conjugates	C02804		13392-69-3	HMDB0061927	Nodiff
M119T467.pos	7.59223e+06	6.32713e+06	0.83337	-0.262971	0.67945	0.931837	3.35352e+06	1.06619e+07	3.66379e+06	8.25527e+06	1.58214e+07	3.79751e+06	4.17559e+06	1.55095e+07	3.45311e+06	5.06173e+06	4.88813e+06	4.87475e+06	0.387164	L-2,4-diaminobutyric acid	119.085	466.5	118.074	26.2335	C4H10N2O2	[M+H]+	Carboxylic acids and derivatives	Amino acids, peptides, and analogues	C03283	Amino acid metabolism	1758-80-1	HMDB0006284	Nodiff
M119T52.neg	6.69711e+07	3.8288e+07	0.571709	-0.806646	0.371387	0.860461	1.06649e+07	4.62977e+07	1.14284e+08	8.25187e+07	5.13786e+07	9.66831e+07	3.83244e+07	5.1719e+07	2.55732e+07	4.27777e+07	3.46126e+07	3.67211e+07	0.762339	L-Erythrulose	119.035	51.8	120.042	2.31864	C4H8O4	[M-H]-	Organooxygen compounds	Carbohydrates and carbohydrate conjugates	C02045		533-50-6/496-55-9	HMDB0006293	Nodiff
M119T575.neg	3.25269e+07	3.59502e+07	1.10524	0.144364	0.491542	0.896525	4.27802e+06	6.46687e+07	2.96867e+07	4.42828e+07	1.0415e+07	4.18302e+07	3.42348e+07	5.20142e+07	1.19246e+07	3.71855e+07	4.64566e+07	3.38854e+07	0.686241	3-Methylthiopropionic acid	118.927	574.9	120.025	17.7605	C4H8O2S	[M-H]-	Fatty Acyls	Fatty acids and conjugates	C08276	Energy metabolism; Amino acid metabolism	646-01-5	HMDB0001527	Nodiff
M120T50.pos	8.21064e+08	1.65268e+08	0.201285	-2.31269	0.171364	0.679427	4.14783e+09	8.74602e+07	2.7982e+08	6.47957e+07	2.70704e+08	7.57806e+07	2.82688e+07	2.78507e+07	2.94213e+07	7.50405e+08	1.10751e+08	4.49096e+07	1.20468	L-Threonine	120.066	50.5	119.058	0.199891	C4H9NO3	[M+H]+	Carboxylic acids and derivatives	Amino acids, peptides, and analogues	C00188	Metabolism of cofactors and vitamins; Membrane transport; Digestive system; Translation; Amino acid metabolism	72-19-5	HMDB0000167	Nodiff
M121T270.neg	2.69236e+07	2.67027e+07	0.991793	-0.0118885	0.755675	0.964946	2.55426e+07	1.51957e+07	3.19692e+07	2.90721e+07	2.7279e+07	3.24831e+07	2.88672e+07	3.05251e+07	2.68278e+07	2.78554e+07	3.86035e+07	7.53698e+06	0.217957	Phenylethylamine	121.029	269.8	121.089	5.2182	C8H11N	[M]-	Benzene and substituted derivatives	Phenethylamines	C05332	Amino acid metabolism	64-04-0	HMDB0012275	Nodiff
M123T278.pos	781432	913953	1.16959	0.226	0.945181	0.990101	1.05438e+06	435038	698830	1.31076e+06	604564	585017	716925	603927	1.0727e+06	1.74592e+06	126071	1.21817e+06	0.0861872	3-Hydroxybenzaldehyde	123.044	277.7	122.037	0.690747	C7H6O2	[M+H]+			C03067		100-83-4		Nodiff
M123T480.pos	4.32301e+06	3.25513e+06	0.752978	-0.409321	0.642785	0.921524	1.15093e+07	3.13138e+06	4.00922e+06	4.45798e+06	835318	1.99481e+06	2.37912e+06	2.68108e+06	2.86427e+06	7.00972e+06	458065	4.13851e+06	0.453585	Niacinamide	123.092	479.6	122.048	2.70179	C6H6N2O	[M+H]+	Pyridines and derivatives	Pyridinecarboxylic acids and derivatives	C00153	Metabolism of cofactors and vitamins; Digestive system	98-92-0	HMDB0001406	Nodiff
M123T66.pos	4.13682e+07	6.59022e+07	1.59306	0.671804	0.687044	0.933093	1.05844e+08	1.28401e+07	4.06718e+07	5.2996e+07	1.45423e+07	2.13149e+07	2.55154e+07	2.07786e+07	3.55233e+07	2.34662e+08	1.18874e+07	6.70459e+07	0.354412	4-Hydroxybenzaldehyde	123.044	66.3	122.037	1.82048	C7H6O2	[M+H]+	Organooxygen compounds	Carbonyl compounds	C00633		123-08-0	HMDB0011718	Nodiff
M124T537.pos	3.65581e+08	3.35144e+08	0.916744	-0.12541	0.916246	0.98491	1.01697e+09	1.91832e+08	2.52712e+08	2.34928e+08	2.70559e+08	2.26485e+08	2.94099e+08	3.41846e+08	2.85856e+08	6.60229e+08	1.9358e+08	2.35254e+08	0.0713298	3-Hydroxybenzyl alcohol glucoside	124.086	536.6	124.052	5.02801	C7H8O2	[M]+	Organooxygen compounds	Carbohydrates and carbohydrate conjugates	C03351		143995-98-6 / 620-24-6	HMDB0038331	Nodiff
M124T62.pos	2.72299e+06	3.17678e+06	1.16665	0.222376	0.408856	0.838977	780596	1.97095e+06	2.26729e+06	2.9047e+06	3.72626e+06	4.68812e+06	3.49452e+06	3.86262e+06	4.68351e+06	2.22102e+06	2.62701e+06	2.172e+06	0.746154	Nicotinic acid	124.04	61.9	123.032	0.00083812	C6H5NO2	[M+H]+	Pyridines and derivatives	Pyridinecarboxylic acids and derivatives	C00253	Metabolism of cofactors and vitamins; Infectious disease: bacterial	59-67-6	HMDB0001488	Nodiff
M124T678.pos	1.96848e+09	1.63612e+09	0.831157	-0.266808	0.235343	0.740078	2.25342e+09	1.39849e+09	1.50267e+09	1.8279e+09	2.00722e+09	2.82118e+09	1.7721e+09	2.17531e+09	1.90075e+09	1.42201e+09	1.2937e+09	1.25283e+09	1.08341	Picolinic acid	124.086	678.2	123.032	0.710349	C6H5NO2	[M+H]+	Pyridines and derivatives	Pyridinecarboxylic acids and derivatives	C10164	Amino acid metabolism	98-98-6 / 14639-25-9	HMDB0002243	Nodiff
M126T51.pos	3.90744e+08	4.38655e+08	1.12262	0.166863	0.473757	0.868329	2.742e+08	3.55583e+08	3.2289e+08	3.34261e+08	4.64844e+08	5.92683e+08	5.61676e+08	5.45862e+08	5.24451e+08	3.48426e+08	3.46054e+08	3.05459e+08	0.618002	Taurine	126.022	51.4	125.015	0.983954	C2H7NO3S	[M+H]+	Organic sulfonic acids and derivatives	Organosulfonic acids and derivatives	C00245	Membrane transport; Metabolism of other amino acids; Lipid metabolism; Signaling molecules and interaction; Energy metabolism	107-35-7	HMDB0000251	Nodiff
M126T73.pos	6.54597e+06	7.32936e+06	1.11967	0.16308	0.404565	0.837186	2.134e+07	1.45294e+06	1.63537e+06	3.44273e+06	6.57766e+06	4.82717e+06	8.17229e+06	7.04667e+06	5.07771e+06	1.62769e+07	3.8958e+06	3.50686e+06	0.737545	Ciliatine	125.986	72.9	125.024	1.00399	C2H8NO3P	[M+H]+	Organic phosphonic acids and derivatives	Organic phosphonic acids	C03557	Membrane transport; Metabolism of other amino acids	2041-14-7	HMDB0011747	Nodiff
M127T88.pos	3.1687e+06	1.49171e+06	0.470764	-1.08692	0.0283602	0.537278	1.76564e+06	4.45094e+06	1.88399e+06	4.90976e+06	1.83127e+06	4.17063e+06	914095	2.63123e+06	579897	1.72993e+06	1.57851e+06	1.51661e+06	1.8112	Thymine	127.05	87.9	126.043	0.78709	C5H6N2O2	[M+H]+	Diazines	Pyrimidines and pyrimidine derivatives	C00178	Nucleotide metabolism	65-71-4	HMDB0000262	Down
M128T47.neg	2.44171e+08	1.78005e+08	0.729017	-0.455976	0.150431	0.779938	2.65925e+08	2.97247e+08	1.60443e+08	2.46159e+08	2.6813e+08	2.27124e+08	2.34827e+08	3.21169e+08	7.20074e+07	2.19298e+08	1.50868e+08	6.98592e+07	1.39273	Pyroglutamic acid	128.035	47.4	129.043	1.70233	C5H7NO3	[M-H]-	Carboxylic acids and derivatives	Amino acids, peptides, and analogues	C01879	Metabolism of other amino acids	98-79-3	HMDB0000267	Nodiff
M128T584.neg	2.91537e+07	5.46023e+07	1.87291	0.905281	0.478507	0.893635	5.20906e+07	8.27877e+06	1.08495e+07	8.18278e+06	3.97442e+07	5.57767e+07	9.08563e+07	1.00356e+07	1.41952e+07	1.01358e+08	1.01268e+08	9.90045e+06	0.64352	Cyanuric acid	128.01	583.5	129.017	1.74986	C3H3N3O3	[M-H]-	Triazines	1,3,5-triazines	C06554		108-80-5/504-19-8	HMDB0041861	Nodiff
M129T44.pos	2.48147e+07	3.05225e+07	1.23001	0.298673	0.629018	0.919655	4.12365e+06	2.61847e+07	4.47859e+07	2.73589e+07	1.72443e+07	2.91909e+07	3.00031e+07	3.14974e+07	4.63866e+07	5.19564e+06	4.03926e+07	2.96594e+07	0.470906	1,1-Dimethylbiguanide	129.102	44.3	129.101	0.0520042	C4H11N5	[M]+	Organonitrogen compounds	Guanidines	C07151	Signal transduction; Aging; Digestive system	1115-70-4 / 657-24-9	HMDB0001921	Nodiff
M129T46.neg	8.17206e+06	1.068e+07	1.30689	0.386133	0.317395	0.845505	1.8856e+07	8.93772e+06	6.83004e+06	3.24724e+06	1.01829e+07	978472	3.60339e+06	7.58473e+06	1.1387e+07	1.50869e+07	1.18076e+07	1.461e+07	0.849778	Itaconate	129.019	45.9	130.027	1.36413	C5H6O4	[M-H]-	Fatty Acyls	Fatty acids and conjugates	C00490		c("97-65-4", "2964-00-3")	HMDB0002092	Nodiff
M129T479.pos	9.4664e+06	9.65426e+06	1.01985	0.0283507	0.587442	0.905653	1.00802e+07	8.69213e+06	9.88482e+06	9.78504e+06	8.89465e+06	9.46158e+06	1.05959e+07	9.89631e+06	8.94572e+06	9.11175e+06	9.76767e+06	9.60824e+06	0.516114	Oxoglutaric acid	129.127	478.7	146.022	2.02777	C5H6O5	[M+H-H2O]+	Keto acids and derivatives	Gamma-keto acids and derivatives	C00026	Metabolism of other amino acids; Signal transduction; Nervous system; Endocrine system; Excretory system; Carbohydrate metabolism; Amino acid metabolism	328-50-7 / 64-15-3	HMDB0000208	Nodiff
M130T184.pos	9.75552e+06	7.60617e+06	0.779678	-0.359049	0.340119	0.804168	1.45466e+07	1.60944e+07	7.30167e+06	6.60441e+06	6.66018e+06	7.32586e+06	9.57027e+06	8.19498e+06	6.91185e+06	6.31452e+06	6.68801e+06	7.95736e+06	0.897042	Isoquinoline	130.065	183.7	129.058	2.49105	C9H7N	[M+H]+	Isoquinolines and derivatives		C06323		119-65-3	HMDB0034244	Nodiff
M130T44.pos	6.04247e+08	4.71217e+08	0.779841	-0.358747	0.840668	0.969468	1.3672e+07	7.68877e+08	7.01011e+08	5.89604e+08	7.24382e+08	8.27939e+08	7.4505e+08	7.02272e+08	5.41155e+08	2.00465e+07	5.14837e+08	3.03943e+08	0.166973	Pipecolic acid	130.087	44.4	129.079	0.00788478	C6H11NO2	[M+H]+	Carboxylic acids and derivatives	Amino acids, peptides, and analogues	C00408	Amino acid metabolism	535-75-1 / 3105-95-1	HMDB0000070	Nodiff
M130T58.pos	3.74397e+07	2.39553e+07	0.639837	-0.644224	0.215343	0.720595	8.03565e+07	3.34198e+07	3.95677e+07	3.14205e+07	2.59053e+07	1.39687e+07	1.58147e+07	1.72532e+07	1.81682e+07	4.11019e+07	2.013e+07	3.12639e+07	1.09586	(2E)-Decenoyl-ACP	130.086	58	129.079	0.76872	C6H11NO2	[M+H]+	Carboxylic acids and derivatives	Amino acids, peptides, and analogues	C03969		52-52-8	HMDB0062225	Nodiff
M130T678.pos	7.5008e+06	8.49158e+06	1.13209	0.178989	0.920035	0.98605	1.21826e+07	5.89514e+06	3.11197e+06	4.47148e+06	1.37805e+07	5.5631e+06	3.57528e+06	2.20646e+07	3.56e+06	9.21677e+06	4.83419e+06	7.69866e+06	0.0820249	Quinoline	130.159	678.5	129.058	1.26348	C9H7N	[M+H]+	Quinolines and derivatives		C06413		91-22-5	HMDB0033731	Nodiff
M131T107.pos	4.6418e+07	3.22383e+07	0.694523	-0.525906	0.0156438	0.504901	4.49567e+07	5.29467e+07	3.38175e+07	6.61822e+07	3.7392e+07	4.32127e+07	3.10932e+07	3.93242e+07	3.06982e+07	2.64508e+07	3.25324e+07	3.33312e+07	1.99414	cis-4-Hydroxy-L-proline	130.967	107.3	131.058	0.244389	C5H9NO3	[M]+			C01015		618-27-9 / 51-35-4 / 30724-02-8		Down
M131T309.pos	1.72539e+06	1.26289e+06	0.731943	-0.450196	0.511287	0.880473	4.49017e+06	941817	1.55968e+06	1.83343e+06	805677	721584	940089	870357	1.0065e+06	2.66594e+06	383661	1.71079e+06	0.608755	Ketoleucine	131.086	309.1	130.063	27.7678	C6H10O3	[M+H]+	Keto acids and derivatives	Short-chain keto acids and derivatives	C00233	Amino acid metabolism	816-66-0	HMDB0000695	Nodiff
M131T49.neg	1.80301e+07	2.30293e+07	1.27727	0.353059	0.487472	0.896115	2.62662e+07	7.79675e+06	4.63838e+06	1.83368e+07	1.63081e+07	3.48346e+07	2.23335e+07	1.61987e+07	2.72834e+07	5.13781e+07	9.81034e+06	1.11715e+07	0.618638	L-Asparagine	131.046	49.2	132.054	1.34304	C4H8N2O3	[M-H]-	Carboxylic acids and derivatives	Amino acids, peptides, and analogues	C00152	Cancer: overview; Amino acid metabolism; Digestive system; Translation	2058-58-4	HMDB0033780	Nodiff
M131T51_1.neg	1.89109e+07	1.66113e+07	0.878399	-0.187052	0.790344	0.973691	6.0182e+07	9.51851e+06	8.73894e+06	1.81198e+07	8.9259e+06	7.98023e+06	9.68303e+06	2.23661e+07	1.03074e+07	2.6777e+07	9.56349e+06	2.09709e+07	0.112354	Glutaric acid	131.035	50.6	132.042	1.34315	C5H8O4	[M-H]-	Carboxylic acids and derivatives	Dicarboxylic acids and derivatives	C00489	Lipid metabolism; Amino acid metabolism	110-94-1	HMDB0000661	Nodiff
M131T79.pos	8.4487e+07	7.10654e+07	0.84114	-0.249583	0.252036	0.751479	6.29563e+07	7.12537e+07	1.16962e+08	7.39711e+07	8.92831e+07	9.24956e+07	7.77203e+07	1.07779e+08	7.2731e+07	7.07531e+07	4.29585e+07	5.44503e+07	1.05348	Leucine	130.967	78.9	131.095	0.0406383	C6H13NO2	[M]+	Carboxylic acids and derivatives	Amino acids, peptides, and analogues	C16439		328-39-2	HMDB0062203	Nodiff
M132T171.pos	5.95453e+07	3.54675e+07	0.595639	-0.747489	0.575932	0.902282	2.11664e+08	2.71358e+07	4.05063e+07	3.92143e+07	2.73535e+07	1.13977e+07	2.01851e+07	2.39643e+07	2.22083e+07	9.3366e+07	1.3431e+07	3.96506e+07	0.517756	L-Isoleucine	132.1	171.1	131.095	11.4301	C6H13NO2	[M+H]+	Carboxylic acids and derivatives	Amino acids, peptides, and analogues	C00407	Cancer: overview; Membrane transport; Digestive system; Translation; Amino acid metabolism	73-32-5	HMDB0000172	Nodiff
M132T250.pos	3.80123e+07	2.12108e+07	0.557998	-0.841668	0.518215	0.884116	1.03293e+08	2.75249e+07	3.98337e+07	5.14086e+06	3.25432e+07	1.97376e+07	2.63008e+07	1.03339e+07	1.88753e+07	3.03058e+07	1.61443e+07	2.53044e+07	0.591987	L-Leucine	132.1	249.6	131.095	14.9584	C6H13NO2	[M+H]+	Carboxylic acids and derivatives	Amino acids, peptides, and analogues	C00123	Cancer: overview; Membrane transport; Signal transduction; Digestive system; Translation; Amino acid metabolism	61-90-5	HMDB0000687	Nodiff
M132T364.pos	5.56955e+07	5.00801e+07	0.899176	-0.153324	0.741967	0.946363	9.20771e+07	1.57966e+07	8.27884e+07	6.39442e+07	6.65392e+07	1.30274e+07	7.23988e+07	4.91799e+07	4.57302e+07	4.3008e+07	4.63873e+07	4.37762e+07	0.349316	N,N-Diethylglycine	132.1	364.4	131.095	14.9584	C6H13NO2	[M+H]+			C16647				Nodiff
M132T46.neg	1.20182e+08	8.74844e+07	0.72793	-0.458128	0.605735	0.930318	3.45162e+08	2.55508e+07	6.13527e+07	7.30466e+07	1.08883e+08	1.07098e+08	7.26157e+07	6.19853e+07	1.48073e+07	2.11485e+08	8.12589e+07	8.2754e+07	0.579818	L-Aspartic acid	132.031	46.1	133.037	3.60522	C4H7NO4	[M-H]-	Carboxylic acids and derivatives	Amino acids, peptides, and analogues	C00049	Cancer: overview; Metabolism of cofactors and vitamins; Metabolism of other amino acids; Membrane transport; Digestive system; Signaling molecules and interaction; Translation; Amino acid metabolism	56-84-8	HMDB0000191	Nodiff
M132T51_2.pos	5.92995e+09	4.08368e+09	0.688654	-0.538148	0.110827	0.633151	1.00615e+10	5.55186e+09	6.65321e+09	3.45108e+09	5.37771e+09	4.48434e+09	5.89836e+09	3.53756e+09	4.93318e+09	4.19275e+09	2.05003e+09	3.89023e+09	1.38703	Creatine	132.077	51.1	131.07	0.181712	C4H9N3O2	[M+H]+	Carboxylic acids and derivatives	Amino acids, peptides, and analogues	C00300	Amino acid metabolism	57-00-1	HMDB0000064	Nodiff
M132T511.pos	1.59066e+07	1.45087e+07	0.912122	-0.132701	0.932029	0.987669	3.87229e+07	1.14512e+07	3.72125e+06	1.60111e+07	9.50847e+06	1.60246e+07	9.65887e+06	2.99078e+07	1.03514e+07	2.35171e+07	6.4653e+06	7.15182e+06	0.130695	(R)-Pantolactone	131.534	511.1	130.063	0.00111366	C6H10O3	[M+H]+			C01012		599-04-2		Nodiff
M132T532.pos	4.00439e+07	1.48063e+07	0.369752	-1.43537	0.0379532	0.560745	5.52758e+07	5.22813e+07	1.58809e+07	1.00193e+07	4.87333e+07	5.8073e+07	2.62106e+07	9.01229e+06	8.15232e+06	2.31195e+07	8.40174e+06	1.39417e+07	1.76007	N-Carbamoylputrescine	132.1	532.2	131.106	13.768	C5H13N3O	[M+H]+	Carboximidic acids and derivatives	Carboximidic acids	C00436	Amino acid metabolism	6851-51-0	HMDB0033458	Down
M132T78.pos	4.70455e+07	2.78696e+07	0.592397	-0.755363	0.174343	0.681009	3.92848e+07	5.44153e+07	2.00907e+07	2.50608e+07	1.06069e+08	3.73524e+07	5.14597e+06	3.83667e+07	1.55962e+07	5.90764e+07	1.488e+07	3.41524e+07	1.21551	cis-4-Hydroxy-D-proline	131.974	78.3	131.058	0.379046	C5H9NO3	[M+H]+	Carboxylic acids and derivatives	Amino acids, peptides, and analogues	C03440	Amino acid metabolism	2584-71-6	HMDB0060460	Nodiff
M133T43.neg	3.61682e+07	2.32112e+07	0.641756	-0.639902	0.504708	0.899696	1.29291e+08	1.11839e+07	2.44881e+07	3.422e+07	8.7702e+06	9.05644e+06	8.96009e+06	1.06808e+07	6.63966e+06	8.42929e+07	7.8844e+06	2.08093e+07	0.794885	L-Malic acid	133.014	42.6	134.022	2.07496	C4H6O5	[M-H]-	Hydroxy acids and derivatives	Beta hydroxy acids and derivatives	C00149	Cancer: overview; Sensory system; Excretory system; Endocrine system; Carbohydrate metabolism; Cancer: specific types	97-67-6 / 6915-15-7	HMDB0000156	Nodiff
M133T44.pos	3.45089e+07	4.74202e+07	1.37414	0.458531	0.292069	0.777374	5.33693e+07	1.96295e+07	1.24361e+07	2.16676e+07	3.55239e+07	6.4427e+07	4.93381e+07	3.73212e+07	5.43512e+07	9.32567e+07	2.49114e+07	2.53424e+07	0.89563	Ornithine	133.097	44.4	132.09	0.931649	C5H12N2O2	[M+H]+	Carboxylic acids and derivatives	Amino acids, peptides, and analogues	C00077	Amino acid metabolism; Membrane transport; Metabolism of other amino acids	3184-13-2/70-26-8	HMDB0000214	Nodiff
M133T64_1.pos	4.06218e+08	3.21141e+08	0.790563	-0.339047	0.606015	0.911752	9.2314e+08	1.71433e+08	4.60783e+08	4.3855e+08	2.00314e+08	2.43086e+08	4.19599e+08	1.18367e+08	1.44792e+08	5.03754e+08	3.50041e+08	3.90291e+08	0.453681	5,6-Dihydro-5-fluorouracil	133.032	63.7	132.034	0.00680574	C4H5FN2O2	[M+H]+	Diazines	Pyrimidines and pyrimidine derivatives	C16630	Xenobiotics biodegradation and metabolism	696-06-0	HMDB0060402	Nodiff
M134T67.neg	776593	845059	1.08816	0.121892	0.539093	0.91034	580603	757793	708789	893487	878187	840701	850328	786883	674687	1.09485e+06	1.04506e+06	618544	0.637949	Adenine	134.048	67	135.054	2.80497	C5H5N5	[M-H]-	Imidazopyrimidines	Purines and purine derivatives	C00147	Nucleotide metabolism	73-24-5	HMDB0000034	Nodiff
M135T291.neg	8.93524e+06	2.36494e+07	2.64676	1.40423	0.0476578	0.689798	6.66934e+06	5.56146e+06	6.13414e+06	2.29896e+07	6.42151e+06	5.83537e+06	7.58633e+06	1.92892e+07	6.94856e+06	2.75053e+07	4.7739e+07	3.28283e+07	1.7392	o-Toluate	135.045	291.1	136.052	2.04376	C8H8O2	[M-H]-	Benzene and substituted derivatives	Benzoic acids and derivatives	C07215		118-90-1	HMDB0002340	Up
[truncated: 393 more rows]

## Sheet: -Ca+B VS +Ca-B
ID	meanControl	meanTreat	foldChange	log2FoldChange	pvalue	FDR	-Ca+B 1	-Ca+B 2	-Ca+B 3	-Ca+B 4	-Ca+B 5	-Ca+B 6	+Ca-B 1	+Ca-B 2	+Ca-B 3	+Ca-B 4	+Ca-B 5	+Ca-B 6	vip	Name	mz	rt	exact_mass	ppm	formula	precursor_type	class	sub_class	KEGG	KEGG_Pathway	CAS	hmdb	Regulation
[truncated: 468 more rows]

[truncated: 2 more sheets: -Ca+B VS -Ca-B, +Ca-B VS -Ca-B]
